# Supplementary material for: Cell and molecular transitions during efficient dedifferentiation
Source: eLife journal article supplement (doi:10.7554/elife.55435), 2020-04-07

**A**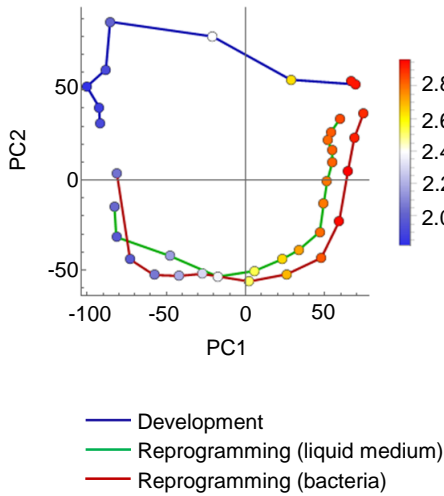**B****GO biological process complete**

|                                                              | FC    | p-value              |
|--------------------------------------------------------------|-------|----------------------|
| N-terminal protein amino acid acetylation                    | 14.44 | 0.00064              |
| ribosomal small subunit assembly                             | 12.38 | 2.5·10 <sup>-6</sup> |
| mitochondrial electron transport, NADH to ubiquinone         | 10.83 | 0.00140              |
| mitochondrial respiratory chain complex I assembly           | 10.83 | 0.00034              |
| cholesterol biosynthetic process                             | 10.83 | 0.00034              |
| ribosomal large subunit assembly                             | 10.36 | 1.3·10 <sup>-7</sup> |
| cytochrome complex assembly                                  | 10.19 | 7.6·10 <sup>-6</sup> |
| aminoacyl-tRNA metabolism involved in translational fidelity | 9.85  | 0.00048              |
| methionine metabolic process                                 | 9.85  | 0.00048              |
| mitochondrial translation                                    | 9.42  | 9.6·10 <sup>-7</sup> |
| positive regulation of translation                           | 9.03  | 0.00065              |
| translational elongation                                     | 8.96  | 1.2·10 <sup>-7</sup> |
| mitochondrial membrane organization                          | 8.33  | 0.00087              |
| protein targeting to mitochondrion                           | 7.74  | 4·10 <sup>-6</sup>   |
| formation of cytoplasmic translation initiation complex      | 7.22  | 0.00147              |
| aspartate family amino acid biosynthetic process             | 6.59  | 0.00026              |
| tRNA aminoacylation for protein translation                  | 6.05  | 3.8·10 <sup>-6</sup> |
| pyrimidine-containing compound metabolic process             | 5.83  | 0.00049              |
| cellular metabolic compound salvage                          | 5.65  | 0.00143              |
| protein transmembrane transport                              | 5.23  | 0.00086              |
| monocarboxylic acid biosynthetic process                     | 4.56  | 0.00081              |
| protein folding                                              | 3.78  | 3.5·10 <sup>-5</sup> |
| drug metabolic process                                       | 2.54  | 0.00081              |

**C**

abpE-2, adk, adkA, agnA, agps, alrB, ancA, apeA, aplB, aplH, aplO, aplP, aplR, aprA, asns, asnS1, asnS2, atp5D, bcs1A, bcs1B, bkdB, bkdC, cas1, cchl, cct2, cct3, cct4, cct5, cct6, cct7, cct8, cdsA, cepB, cf45-1, cmbl, cmfB, cox11, cox17, cpnF, ctsZ, cyb5B, cyb5r1, cyc1, cyp51, cyp518A1, cyp524A1, cypD, cytC, d2hgdh, dcd1A, ddcA, dduA, dduC, dduD, dmpA, dolpp1, dph5, drg1, dtd, dydA, ebp, efa1B, efa1G, efaAII, efbA, eif2b1, eif2b3, eif3C, eif3F, eif3H, eif3K, eif5a, eloB, erg2, erg24, etnkB, fahd1, fam45, fdft, fps, fszA, fxn, gatB, gcvP, gmfA, gpsn2, grlG, grn, guf1, gxcR, hatB, hibA, hspA, hspE-2, idhA, idhB, impa1, ivdA, jcdF, mcfG, mcfJ, mcfL, mcfN, mcfP, mecR, metK, mett1, mgluS, mhisS, midA, mileS, mleuS, mlysS, mmm1, mmsdh, mocs3, mppA2, mppB, mproS, mrpl13, mrpl15, mrpl17, mrpl21, mrpl22, mrpl27, mrpl3, mrpl33, mrpl51, mrpl53, mrps17, mserS, mth, mtr, mtyrS, mvd, mvk, naa20, naa50, nacA, nacB, nad2, nad4L, naprt, natA, ndkC-2, ndufa8, ndufab1, ndufb7, ndufv1, ndufv2, nipsnap, nudt19, oxaB, p2xA, pabpc1A, pabpc1B, pemtA, pfdn6, pmmB, porA, ppt2, ppt3, prmt5, ptcG, ptcl, purA, pus3, pyd2, pyrK, rab32B, rad50, ranbp1, rcaA, rcdBB, recA, redA, rliF, romo1, rpb8, rpkA, **rpl10, rpl10a, rpl11, rpl12, rpl13, rpl13a, rpl14, rpl15-2, rpl17, rpl18, rpl18a, rpl19, rpl21, rpl22, rpl22a, rpl23, rpl23a, rpl24, rpl26, rpl27, rpl27a, rpl28, rpl29, rpl3, rpl30, rpl31, rpl32, rpl34, rpl35, rpl35a, rpl36, rpl36a, rpl37, rpl37A, rpl38, rpl39, rpl4, rpl5, rpl6, rpl7, rpl7a, rpl8, rpl9, rplP0, rplP1, rplP1B, rplP2, rps10, rps11, rps12, rps13, rps14, rps15, rps15a, rps16, rps17, rps18, rps19, rps2, rps20, rps21, rps23, rps24, rps25, rps26, rps27, rps28, rps29, rps30-2, rps3a, rps4, rps5, rps6, rps7, rps8, rps9, rpsA, rvb1, sac1, sahA, samm50, scdB-2, scsA, scsC, serC, sfbA, smtA, srr, surf1-2, tbcB, tcp1, thrS2, timm10, timm23, tkrA, tom40, top2mt, trmt6, tRNA-Glu-UUC-1, tsfm, tufM, twfA, u2af2, ubqB, ubqC, ucr, uprt, urm1, valS2, vatA, vatC, vps26, vps33, wdr85, xpo4**

**D**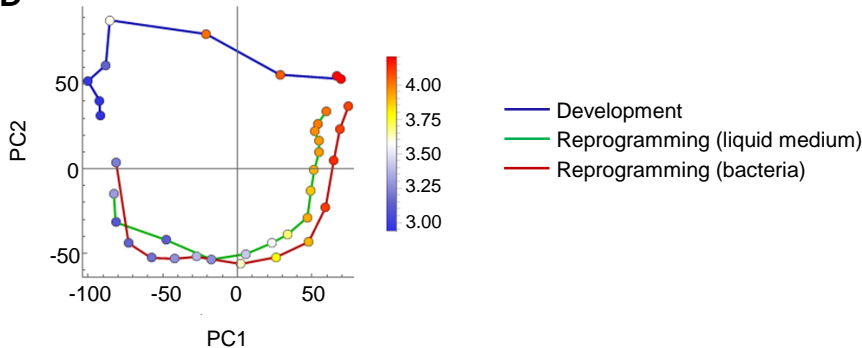

Supplement: supp [file elife-55435-supp-v1.zip › elife_poa_e55435_Figure_2_figure_supplement_1.pdf]
