# Supplementary material for: Cell and molecular transitions during efficient dedifferentiation
Source: eLife journal article supplement (doi:10.7554/elife.55435), 2020-04-07

**A**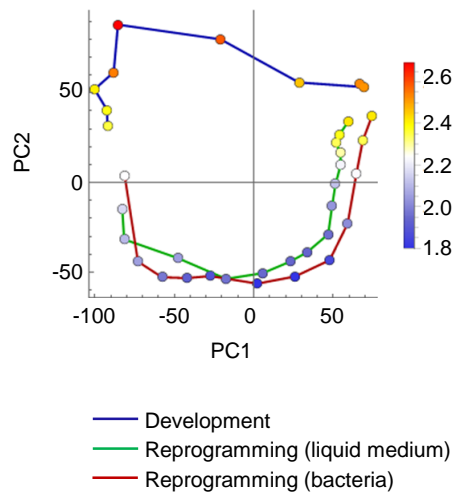**B****GO biological process complete**

|                                                                        | FC    | p-value               |
|------------------------------------------------------------------------|-------|-----------------------|
| positive regulation of RNA polymerase II transcriptional preinitiation | 23.72 | 2.3·10 <sup>-5</sup>  |
| complex assembly                                                       | 22.14 | 1.2·10 <sup>-12</sup> |
| proteasomal ubiquitin-independent protein catabolic process            | 18.98 | 0.00028               |
| protein N-linked glycosylation via asparagine                          | 18.98 | 0.00028               |
| oxaloacetate metabolic process                                         | 18.98 | 0.00028               |
| NADH metabolic process                                                 | 18.98 | 0.00028               |
| posttranslational protein targeting to endoplasmic reticulum membrane  | 18.98 | 0.00028               |
| proteasome assembly                                                    | 18.64 | 1.1·10 <sup>-9</sup>  |
| mitochondrial electron transport, succinate to ubiquinone              | 17.79 | 0.00204               |
| signal peptide processing                                              | 16.94 | 6.7·10 <sup>-5</sup>  |
| glycolipid biosynthetic process                                        | 9.82  | 4.6·10 <sup>-8</sup>  |
| cotranslational protein targeting to membrane                          | 13.84 | 5.6·10 <sup>-6</sup>  |
| poly(A) <sup>+</sup> mRNA export from nucleus                          | 13.55 | 0.00070               |
| protein prenylation                                                    | 13.55 | 0.00070               |
| peptide catabolic process                                              | 11.86 | 0.00101               |
| tricarboxylic acid cycle                                               | 9.66  | 1.9·10 <sup>-7</sup>  |
| glucose 6-phosphate metabolic process                                  | 9.49  | 0.00192               |
| glycolytic process                                                     | 9.49  | 1·10 <sup>-5</sup>    |
| NADP metabolic process                                                 | 9.12  | 0.00059               |
| retrograde vesicle-mediated transport, Golgi to endoplasmic reticulum  | 9.04  | 1.4·10 <sup>-5</sup>  |
| mannosylation                                                          | 8.37  | 0.00024               |
| glucose metabolic process                                              | 7.91  | 0.00099               |
| endoplasmic reticulum to Golgi vesicle-mediated transport              | 7.39  | 2.9·10 <sup>-10</sup> |
| ATP-dependent chromatin remodeling                                     | 6.98  | 0.00158               |
| cellular aldehyde metabolic process                                    | 6.78  | 0.00061               |
| negative regulation of cellular amide metabolic process                | 6.59  | 0.00195               |
| Golgi organization                                                     | 6.59  | 0.00195               |
| polyol biosynthetic process                                            | 6.24  | 0.00238               |
| nucleotide-sugar metabolic process                                     | 6.24  | 0.00238               |
| proteasome-mediated ubiquitin-dependent protein catabolic process      | 6.2   | 2.5·10 <sup>-13</sup> |
| protein peptidyl-prolyl isomerization                                  | 5.27  | 0.00186               |
| cell redox homeostasis                                                 | 4.41  | 0.00093               |
| response to endoplasmic reticulum stress                               | 4.13  | 0.00137               |
| transcription by RNA polymerase II                                     | 3.54  | 0.00019               |
| negative regulation of gene expression                                 | 2.58  | 0.00065               |
| mRNA processing                                                        | 2.52  | 0.00084               |

**C**

abnC, acbd6, aco2, acp1, act17, act18, act21, adm1-2, agnD, alg1, alg3, alyA, ap2a1-2, aplQ, apm2, argJ, arpA, arpD, arpE, arpF, arpH, arsA, atox1, bloc1s1, cdc73, cdk7, chcA, chid1, clc, clybl, cniB, cnr1, cnxX, copA, copB, copB2, copE, crtA, cstf1, cttnbl1, culD, cxdA, cxfA, cxgE, cycC, cyp508A4, cypE, DG1122, dgtA, dgtB, dhx16, dicA, dlcA, dnepe, dpm2-2, dpoA, dpp3-2, dr1, drnA-2, dynC, dync1li1, dynD, echs1, eco1, empA, empB, empC, empD, enoA, ergic3, erh, esd, etfa, etfb, etfdh, fntA, fntB, gabT, gcvH1, gemA, gemin1, ggtA, glk, glnA2, gloA, gloB1, gmd, gmppA, gnd, gpaI, gpdA, gpmA, gtaT, gtaW, gtf2h3, gxcL, H2Av2, hcpA, helC, hemB, hspL, idhM, ints7, ipkA1, ippB, isw, itpk1, iunH, lap, ldhd, lkhA, lsm4, lsm8, masA, mcee, mcfT, mdhA, mdhB, mdhC, med10, med15, med16, med18, med27, med4, med7, med9, mgm101, mlkA, mmgt, mtpn, myoC, nagB, ndkM, nif3, nup107, nup93, oplah, ost1, ost2, ost3, ost4, ostc, paf1, pcbd, pccA, pccB, pdhA, pdi1, pemtB, pex19, pex2, pfkA, pfp1, pggt1b, pgkA, pgmA, phbA, phbB, pigB, pigS, pigT, pigW, pigX, pksB, pmmA, ppa1, ppiA, ppp2r4, prdx5, prlA, prsB, psaA, psaB, **psmA1, psmA2, psmA3, psmA4, psmA5, psmA6, psmA7, psmB1, psmB2, psmB3, psmB4-2, psmB5, psmB6, psmB7, psmC1, psmC2, psmC3, psmC4, psmC5, psmC6, psmD1, psmD10, psmD11, psmD12, psmD13, psmD14, psmD2, psmD3, psmD4, psmD6, psmD7, psmD8-2, psmG1, psmG2, psmG3**, pter, rabF1-2, rabgta, rae1, rbbD, repE, rer1, rnu1b, rnu2c, rpb11, rpb4, rpiA, sae1, sarB, scfd2, scsB, sdhA, sdhB, sdhC, sdhD, sec11, sec13, sec20, sec24, sec31, sec61a, sec61b, sec61g, sf3b5, sgtA, sir2C, slc35b4, smlA, smp3, smu1, snd1, snrpA1, snrpD3, sod2, spc1, spc2, spc3, sr, srp14-2, srp19, srp68, srp72, srpA, srpB, ssr1, ssr2, ssr3, ssu72, stt3, swp1, thyB, tkt-2, trappc2, trappc4, tRNA-Met-CAU-2, tsn, tubA, tubA2, uba2, uba5, ubr7, uch2, ufc1, ufd1, ugt1, usp14, usp39, vatP, vps36, wbp1, xpnpep1, xpo7, zmpste24

**D**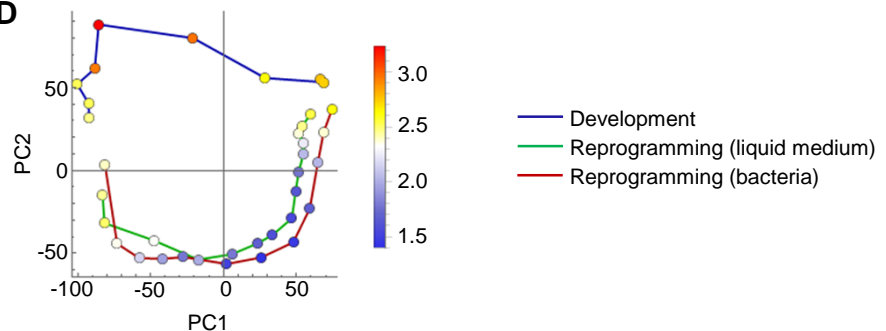

Supplement: supp [file elife-55435-supp-v1.zip › elife_poa_e55435_Figure_2_figure_supplement_3.pdf]
