# Supplementary material for: Cell and molecular transitions during efficient dedifferentiation
Source: eLife journal article supplement (doi:10.7554/elife.55435), 2020-04-07
Supplement: supp [file elife-55435-supp-v1.zip]

Archive with 19 entries (19 files):
- elife_poa_e55435_Figure_3_figure_supplement_1.pdf
- elife_poa_e55435_Figure_5_figure_supplement_1.pdf
- elife_poa_e55435_Figure_2_figure_supplement_8.pdf
- elife_poa_e55435_Figure_6_figure_supplement_1.pdf
- elife_poa_e55435_Figure_2_figure_supplement_6.pdf
- elife_poa_e55435_Supplementary_file_1.docx
- elife_poa_e55435_Transparent_Reporting_File.docx
- elife_poa_e55435_Figure_4_source_data_1.xlsx
- elife_poa_e55435_Figure_2_figure_supplement_3.pdf
- elife_poa_e55435_Figure_2_figure_supplement_1.pdf
- elife_poa_e55435_Figure_2_figure_supplement_2.pdf
- elife_poa_e55435_Figure_6_source_data_1.xlsx
- elife_poa_e55435_Figure_2_figure_supplement_7.pdf
- elife_poa_e55435_Figure_2_figure_supplement_5.pdf
- elife_poa_e55435_Figure_3_source_data_1.xlsx
- elife_poa_e55435_Figure_2_figure_supplement_9.pdf
- elife_poa_e55435_Figure_2_figure_supplement_4.pdf
- elife_poa_e55435_Figure_4_figure_supplement_1.pdf
- elife_poa_e55435_Figure_5_source_data_1.xlsx
