# Supplementary material for: Cell and molecular transitions during efficient dedifferentiation
Source: eLife journal article supplement (doi:10.7554/elife.55435), 2020-04-07
Supplement: supp [file elife-55435-supp-v1.zip › elife_poa_e55435_Figure_2_figure_supplement_4.pdf]

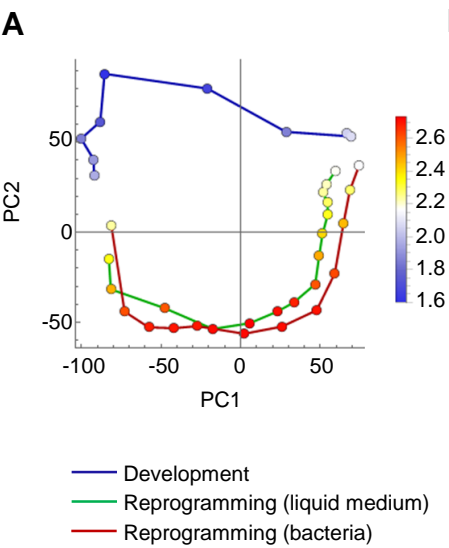

**B**

| GO biological process complete                     | FC    | p-value               |
|----------------------------------------------------|-------|-----------------------|
| small nucleolar ribonucleoprotein complex assembly | 13.68 | 0.00018               |
| ribosomal large subunit biogenesis                 | 7.06  | 1.1·10 <sup>-10</sup> |
| ribosomal subunit export from nucleus              | 9.58  | 0.00016               |
| maturation of 5.8S rRNA                            | 9.58  | 1·10 <sup>-6</sup>    |
| ribosomal small subunit biogenesis                 | 7.28  | 5.7·10 <sup>-10</sup> |
| cleavage involved in rRNA processing               | 7.66  | 0.00042               |
| rRNA methylation                                   | 7.45  | 0.00016               |
| tRNA modification                                  | 4.73  | 4.4·10 <sup>-8</sup>  |
