# Supplementary material for: Cell and molecular transitions during efficient dedifferentiation
Source: eLife journal article supplement (doi:10.7554/elife.55435), 2020-04-07
Supplement: supp [file elife-55435-supp-v1.zip › elife_poa_e55435_Figure_2_figure_supplement_6.pdf]

A

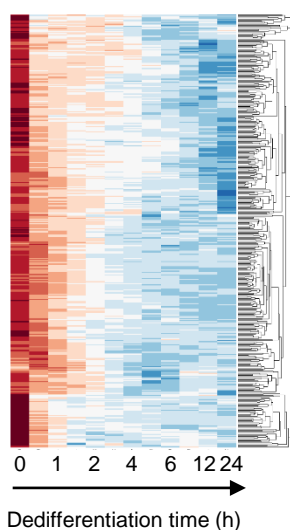**GO biological process complete**

spore wall assembly  
culmination involved in sorocarp development

| FC   | p-value              |
|------|----------------------|
| 15.5 | 6.8·10 <sup>-5</sup> |
| 3.47 | 0.00011              |

B

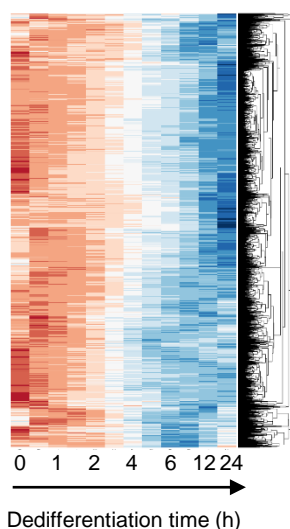**GO biological process complete**

regulation of cell-cell adhesion  
phosphorelay signal transduction system  
response to differentiation-inducing factor 1  
cell-cell adhesion via plasma-membrane adhesion molecules  
cAMP-mediated signaling  
sorocarp spore cell differentiation  
protein autophosphorylation  
peptidyl-threonine phosphorylation  
slug development involved in sorocarp development  
response to purine-containing compound  
positive regulation of chemorepellent activity  
signal transduction by protein phosphorylation  
peptidyl-serine phosphorylation  
negative regulation of hydrolase activity  
peptidyl-tyrosine phosphorylation  
actin filament bundle assembly  
sorocarp stalk cell differentiation  
stress-activated protein kinase signaling cascade  
regulation of cell differentiation  
activation of GTPase activity  
activation of protein kinase activity  
sporulation resulting in formation of a cellular spore  
aggregation involved in sorocarp development  
chemotaxis to cAMP  
regulation of Rho protein signal transduction  
regulation of protein serine/threonine kinase activity  
response to light stimulus  
multicellular organism development  
cell motility  
regulation of sorocarp development  
protein dephosphorylation  
mitotic cytokinesis  
response to drug  
small GTPase mediated signal transduction  
regulation of cytoskeleton organization  
protein ubiquitination

| FC   | p-value              |
|------|----------------------|
| 6.22 | 0.00251              |
| 5.19 | 7.6·10 <sup>-6</sup> |
| 4.84 | 1.4·10 <sup>-7</sup> |
| 4.47 | 0.00215              |
| 4.36 | 3.4·10 <sup>-5</sup> |
| 4.27 | 0.00079              |
| 4.15 | 0.00029              |
| 4.09 | 0.00182              |
| 3.84 | 0.00248              |
| 3.63 | 0.00073              |
| 3.63 | 0.00200              |
| 3.63 | 7.5·10 <sup>-7</sup> |
| 3.52 | 0.00013              |
| 3.51 | 0.00035              |
| 3.49 | 0.00096              |
| 3.28 | 0.00060              |
| 3.2  | 0.00266              |
| 3.11 | 0.00059              |
| 3.11 | 1.6·10 <sup>-5</sup> |
| 3.04 | 0.00022              |
| 2.96 | 6.3·10 <sup>-5</sup> |
| 2.89 | 4.1·10 <sup>-6</sup> |
| 2.86 | 3.4·10 <sup>-9</sup> |
| 2.78 | 1.2·10 <sup>-6</sup> |
| 2.72 | 0.00083              |
| 2.54 | 0.00084              |
| 2.52 | 0.00197              |
| 2.48 | 9.8·10 <sup>-5</sup> |
| 2.42 | 3.9·10 <sup>-5</sup> |
| 2.42 | 5.3·10 <sup>-5</sup> |
| 2.36 | 0.00031              |
| 2.3  | 0.00013              |
| 2.03 | 0.00104              |
| 1.99 | 0.00022              |
| 1.92 | 0.00168              |
| 1.76 | 0.00184              |
