# Supplementary material for: Cell and molecular transitions during efficient dedifferentiation
Source: eLife journal article supplement (doi:10.7554/elife.55435), 2020-04-07
Supplement: supp [file elife-55435-supp-v1.zip › elife_poa_e55435_Figure_2_figure_supplement_8.pdf]

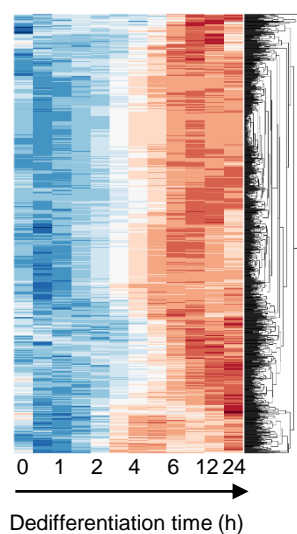

#### GO biological process complete

|                                                      | FC    | p-value               |
|------------------------------------------------------|-------|-----------------------|
| ATP synthesis coupled electron transport             | 7.95  | 4.2·10 <sup>-9</sup>  |
| ATP synthesis coupled proton transport               | 10.91 | 9.1·10 <sup>-7</sup>  |
| translation                                          | 7.72  | 2.3·10 <sup>-74</sup> |
| methionine biosynthetic process                      | 9.16  | 9.2·10 <sup>-5</sup>  |
| NADH dehydrogenase complex assembly                  | 9.16  | 9.2·10 <sup>-5</sup>  |
| valine catabolic process                             | 8.73  | 0.00036               |
| ribosomal small subunit assembly                     | 8.42  | 1.5·10 <sup>-5</sup>  |
| pyrimidine-containing compound salvage               | 8.18  | 0.00142               |
| mitochondrial electron transport, NADH to ubiquinone | 8.18  | 0.00142               |
| ergosterol biosynthetic process                      | 8.18  | 0.00142               |
| cholesterol biosynthetic process                     | 7.85  | 0.00054               |
| nucleotide salvage                                   | 7.64  | 0.00021               |
| mitochondrial protein processing                     | 7.27  | 0.00208               |
| inner mitochondrial membrane organization            | 7.27  | 0.00208               |
| mitochondrial transmembrane transport                | 6.81  | 1.1·10 <sup>-6</sup>  |
| acetyl-CoA metabolic process                         | 6.55  | 0.00043               |
| protein targeting to mitochondrion                   | 6.55  | 6·10 <sup>-7</sup>    |
| positive regulation of translation                   | 6.55  | 0.00111               |
| mitochondrial translation                            | 6.26  | 1.4·10 <sup>-5</sup>  |
| protein folding                                      | 4.57  | 3.1·10 <sup>-10</sup> |
| tRNA aminoacylation for protein translation          | 6.09  | 6.2·10 <sup>-9</sup>  |
| ribosomal large subunit assembly                     | 5.69  | 6.4·10 <sup>-5</sup>  |
| cytochrome complex assembly                          | 5.39  | 0.00105               |
| chaperone-mediated protein folding                   | 5.39  | 0.00105               |
| aerobic respiration                                  | 5.3   | 4.1·10 <sup>-7</sup>  |
| translational elongation                             | 4.97  | 7.4·10 <sup>-5</sup>  |
| pyrimidine-containing compound metabolic process     | 4.53  | 0.00058               |
| protein transmembrane transport                      | 4.06  | 0.00110               |
| oxidoreduction coenzyme metabolic process            | 3.8   | 0.00162               |
| protein import                                       | 3.17  | 0.00029               |
| mRNA splicing, via spliceosome                       | 2.7   | 0.00020               |
| cofactor biosynthetic process                        | 2.59  | 0.00021               |
| monocarboxylic acid metabolic process                | 2.13  | 0.00241               |
