# Supplementary material for: Cell and molecular transitions during efficient dedifferentiation
Source: eLife journal article supplement (doi:10.7554/elife.55435), 2020-04-07
Supplement: supp [file elife-55435-supp-v1.zip › elife_poa_e55435_Figure_2_figure_supplement_9.pdf]

A

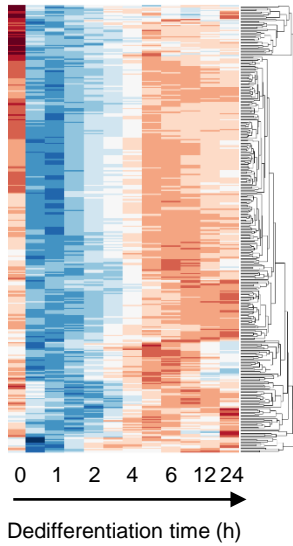

## GO biological process complete

|                                                              | FC    | p-value               |
|--------------------------------------------------------------|-------|-----------------------|
| DNA strand elongation involved in DNA replication            | 30.06 | 1.3·10 <sup>-14</sup> |
| mitotic DNA replication initiation                           | 36.5  | 3.2·10 <sup>-5</sup>  |
| pre-replicative complex assembly involved in DNA replication | 36.5  | 2.6·10 <sup>-8</sup>  |
| chromosome condensation                                      | 24.33 | 2.3·10 <sup>-8</sup>  |
| microtubule polymerization                                   | 22.81 | 1.4·10 <sup>-5</sup>  |
| replication fork arrest                                      | 36.5  | 0.00035               |
| lagging strand elongation                                    | 29.2  | 5.6·10 <sup>-5</sup>  |
| mitotic sister chromatid segregation                         | 18.84 | 3.3·10 <sup>-14</sup> |
| DNA repair                                                   | 8.05  | 8.7·10 <sup>-23</sup> |
| pyrimidine deoxyribonucleotide biosynthetic process          | 27.37 | 0.00061               |
| establishment of chromosome localization                     | 21.9  | 0.00095               |
| mitotic spindle assembly                                     | 20.86 | 0.00014               |
| DNA unwinding involved in DNA replication                    | 20.28 | 2.2·10 <sup>-5</sup>  |
| DNA replication checkpoint                                   | 18.25 | 3.2·10 <sup>-5</sup>  |
| cytoplasmic microtubule organization                         | 18.25 | 3.2·10 <sup>-5</sup>  |
| mitotic spindle assembly checkpoint                          | 18.25 | 0.00021               |
| maintenance of DNA repeat elements                           | 18.25 | 0.00140               |
| double-strand break repair via homologous recombination      | 7.87  | 6.2·10 <sup>-7</sup>  |
| 'de novo' IMP biosynthetic process                           | 15.64 | 0.00196               |
| mismatch repair                                              | 15.03 | 2.1·10 <sup>-6</sup>  |
| DNA synthesis involved in DNA repair                         | 13.69 | 0.00265               |
| regulation of cell cycle G2/M phase transition               | 12.17 | 0.00070               |
| sister chromatid cohesion                                    | 18.25 | 1.2·10 <sup>-7</sup>  |
| microtubule-based movement                                   | 13.27 | 8.3·10 <sup>-7</sup>  |
| base-excision repair                                         | 13.04 | 0.00011               |
| chromosome separation                                        | 12.88 | 2.4·10 <sup>-5</sup>  |
| centrosome cycle                                             | 12.17 | 0.00015               |
| chromatin silencing                                          | 11.23 | 0.00090               |
| mitotic DNA integrity checkpoint                             | 8.11  | 0.00249               |
| telomere maintenance                                         | 8.11  | 0.00249               |
| protein import into nucleus                                  | 7.1   | 0.00013               |
| cell division                                                | 6.48  | 2.3·10 <sup>-13</sup> |
| protein export from nucleus                                  | 6.08  | 0.00030               |
| proton transmembrane transport                               | 5.84  | 0.00014               |
| protein-containing complex localization                      | 4.87  | 0.00226               |
| mRNA splicing, via spliceosome                               | 3.39  | 0.00208               |

B

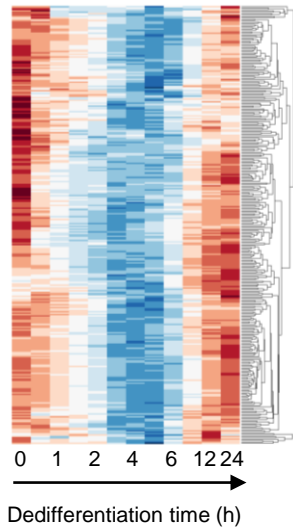

## GO biological process complete

|                                                                           | FC    | p-value               |
|---------------------------------------------------------------------------|-------|-----------------------|
| proteasomal protein catabolic process                                     | 12.49 | 3.8·10 <sup>-25</sup> |
| positive regulation of transcription initiation from RNA pol. II promoter | 25.44 | 8.4·10 <sup>-6</sup>  |
| fructose 1,6-bisphosphate metabolic process                               | 40.7  | 0.00026               |
| COPII-coated vesicle cargo loading                                        | 40.7  | 0.00026               |
| attachment of GPI anchor to protein                                       | 33.91 | 3.2·10 <sup>-6</sup>  |
| arginine biosynthetic process                                             | 32.56 | 3.7·10 <sup>-5</sup>  |
| oxaloacetate metabolic process                                            | 24.42 | 0.00070               |
| NADH metabolic process                                                    | 24.42 | 0.00070               |
| signal peptide processing                                                 | 23.26 | 9.4·10 <sup>-5</sup>  |
| proteasome assembly                                                       | 23.26 | 2.4·10 <sup>-8</sup>  |
| NADPH regeneration                                                        | 20.35 | 0.00014               |
| peptide catabolic process                                                 | 20.35 | 0.00014               |
| glyoxylate cycle                                                          | 20.35 | 0.00103               |
| hydrogen peroxide catabolic process                                       | 17.44 | 0.00145               |
| glycolytic process                                                        | 16.28 | 2.1·10 <sup>-7</sup>  |
| gluconeogenesis                                                           | 16.28 | 0.00027               |
| endoplasmic reticulum organization                                        | 14.8  | 0.00036               |
| ubiquitin-dependent ERAD pathway                                          | 11.63 | 1.7·10 <sup>-6</sup>  |
| retrograde vesicle-mediated transport, Golgi to ER                        | 9.69  | 0.00033               |
| protein localization to endoplasmic reticulum                             | 9.04  | 0.00012               |
| regulation of protein catabolic process                                   | 8.14  | 0.00019               |
| intra-Golgi vesicle-mediated transport                                    | 8.14  | 0.00067               |
| cellular response to oxidative stress                                     | 7.94  | 1.9·10 <sup>-5</sup>  |
| tricarboxylic acid cycle                                                  | 7.54  | 0.00091               |
| fatty acid beta-oxidation                                                 | 7.54  | 0.00091               |
| cellular oxidant detoxification                                           | 6.78  | 0.00046               |
| regulation of proteolysis                                                 | 5.81  | 0.00095               |
| cell redox homeostasis                                                    | 5.68  | 0.00106               |
| negative regulation of gene expression                                    | 3.13  | 0.00074               |
| intracellular protein transport                                           | 2.44  | 0.00035               |
