# Supplementary material for: Cell and molecular transitions during efficient dedifferentiation
Source: eLife journal article supplement (doi:10.7554/elife.55435), 2020-04-07
Supplement: supp [file elife-55435-supp-v1.zip › elife_poa_e55435_Figure_3_source_data_1.xlsx]

## Sheet: Fig 3D macropinocytosis
Fig 3D macropinocytosis assay
	fluid uptake (fraction of control)
time(h)	day1	day2	day3	day4
0	-0.04632	-0.15406	-0.08484	0.088125
4	0.077721	-0.10544	0.065465	0.01504
8	0.133108	0.238145	0.301551	0.074129
10	0.021207	-0.07874	0.176831	0.273598
24	0.541957	0.86402	0.087756	0.385609
30		0.551316	0.36599	0.615075

## Sheet: Fig 3 supp 1C
Figure 3 supplementary figure 1C forG- clonal recovery
Clonal recovery as % expected clones
	Dedifferentiation
	WT	forG-
day 1	82.6667	16
day 2	38.5	7
day 3	79	38
day 4	54.4	39.2
	Undifferentiated
	WT	forG-
day 1	90.5	79
day 2	74.5	53.5
day 3	84	74.8

## Sheet: Fig 3 supp 1D
Figure 3 supplementary figure 1D rasS- clonal recovery
Clonal recovery as % expected clones
	Dedifferentiation
	WT	rasS-
day1	48	47
day2	66	65.6667
day3	57.3333	49.3333
	Undifferentiated
	WT	rasS-
day1	88.5	65
day2	88.6667	89
day3	66.6667	46.3333
