# Supplementary material for: Cell and molecular transitions during efficient dedifferentiation
Source: eLife journal article supplement (doi:10.7554/elife.55435), 2020-04-07
Supplement: supp [file elife-55435-supp-v1.zip › elife_poa_e55435_Figure_4_source_data_1.xlsx]

## Sheet: Key
Act8:mNeonGreen intensity tracking and division scoring.
Related to Figure 4 and Figure 4 supplementary figure 1
Sheet "Act8 intensity tracks" contains median pixel intensity values at each timepoint for tracked cells. Each tracked cell has a unique track ID (track_ID column).
Following a division, each daughter cell starts a new track with new track_ID
Sheet "Act8 cell fate and division" contains information of tracking outcome, division times and lineages
The track_ID links this information to the act8 pixel intensity values for that cell
Lineages of cells share a "unique family" ID
Key to "fate" column
d = divides
nd = no division
e = exits field of view before end of imaging
l = cell lyses

## Sheet: Act8 intensity tracks
Median pixel intensity (AU)	Slice	time (h)	track_id
21835.6	1	0	1
29238.8	3	0.166667	1
24123.1	7	0.5	1
23373.2	9	0.666667	1
15734	13	1	1
15716.8	15	1.16667	1
23599.7	17	1.33333	1
22539.6	19	1.5	1
30304.8	21	1.66667	1
30603.2	23	1.83333	1
30046	25	2	1
27076.9	29	2.33333	1
27720.1	31	2.5	1
20829.1	33	2.66667	1
26492.4	35	2.83333	1
15172.3	37	3	1
18816.7	39	3.16667	1
17193.6	41	3.33333	1
15749.5	43	3.5	1
34360.9	47	3.83333	1
30106.7	49	4	1
31884.5	51	4.16667	1
42213.4	55	4.5	1
45811.2	57	4.66667	1
56649.4	59	4.83333	1
57151.7	61	5	1
77021.3	63	5.16667	1
68118.7	65	5.33333	1
69855.3	67	5.5	1
75027.5	69	5.66667	1
96863.3	71	5.83333	1
94423	73	6	1
119787	77	6.33333	1
123571	79	6.5	1
131760	81	6.66667	1
155414	83	6.83333	1
154512	85	7	1
171960	87	7.16667	1
200294	91	7.5	1
242168	93	7.66667	1
288959	95	7.83333	1
249809	97	8	1
308766	99	8.16667	1
340136	101	8.33333	1
345867	103	8.5	1
401078	105	8.66667	1
95906.3	53	4.33333	10
74301.1	55	4.5	10
103873	57	4.66667	10
115061	59	4.83333	10
77364.3	61	5	10
91628.9	63	5.16667	10
68109.7	65	5.33333	10
64225.5	67	5.5	10
93905.2	69	5.66667	10
84026.5	71	5.83333	10
74436.4	73	6	10
87402.4	75	6.16667	10
92075	77	6.33333	10
74665.1	79	6.5	10
60880.8	81	6.66667	10
77944.5	83	6.83333	10
87254.3	85	7	10
76268.2	87	7.16667	10
76405.8	89	7.33333	10
74496.5	91	7.5	10
70034.7	93	7.66667	10
58011.8	95	7.83333	10
56308.1	97	8	10
55870.3	99	8.16667	10
56371.5	101	8.33333	10
60769.8	103	8.5	10
51942.4	105	8.66667	10
50457.9	107	8.83333	10
48842.1	111	9.16667	10
46907.2	113	9.33333	10
46247.6	115	9.5	10
43448	117	9.66667	10
51176.5	119	9.83333	10
49929.6	121	10	10
46139.1	123	10.1667	10
42951.9	125	10.3333	10
50658.9	127	10.5	10
48934.2	129	10.6667	10
40103.2	131	10.8333	10
38894	133	11	10
30132.1	135	11.1667	10
32965.8	137	11.3333	10
40115.5	139	11.5	10
30048.6	141	11.6667	10
42712.1	143	11.8333	10
49587.1	145	12	10
59446	147	12.1667	10
55633.4	149	12.3333	10
45605.8	151	12.5	10
53581.2	153	12.6667	10
51123.4	155	12.8333	10
67231.8	157	13	10
79409.2	159	13.1667	10
73990.4	161	13.3333	10
79967.2	163	13.5	10
88807.5	165	13.6667	10
107930	167	13.8333	10
90053.4	169	14	10
96438.2	171	14.1667	10
86407.1	173	14.3333	10
83029.8	175	14.5	10
82564.6	177	14.6667	10
85754.4	179	14.8333	10
63626.5	183	15.1667	10
94547.8	185	15.3333	10
113834	189	15.6667	10
131121	191	15.8333	10
127589	193	16	10
168193	195	16.1667	10
165124	197	16.3333	10
224140	199	16.5	10
171878	201	16.6667	10
152721	203	16.8333	10
149794	205	17	10
194072	207	17.1667	10
162260	209	17.3333	10
159393	211	17.5	10
205708	213	17.6667	10
239056	215	17.8333	10
197328	217	18	10
212784	219	18.1667	10
279621	221	18.3333	10
319234	223	18.5	10
285652	225	18.6667	10
288627	227	18.8333	10
363069	229	19	10
295782	231	19.1667	10
297914	233	19.3333	10
285430	235	19.5	10
298707	237	19.6667	10
379717	239	19.8333	10
269594	241	20	10
351795	243	20.1667	10
314793	245	20.3333	10
507158	247	20.5	10
493029	249	20.6667	10
398005	251	20.8333	10
397143	253	21	10
435342	255	21.1667	10
582163	257	21.3333	10
530228	259	21.5	10
526680	261	21.6667	10
402857	263	21.8333	10
491562	265	22	10
527716	267	22.1667	10
462883	269	22.3333	10
481117	271	22.5	10
596885	273	22.6667	10
429851	275	22.8333	10
405189	277	23	10
444883	279	23.1667	10
383923	281	23.3333	10
421063	283	23.5	10
383613	285	23.6667	10
432029	287	23.8333	10
447907	289	24	10
530728	291	24.1667	10
446728	293	24.3333	10
541929	295	24.5	10
497181	297	24.6667	10
630254	299	24.8333	10
617078	303	25.1667	10
536774	305	25.3333	10
572274	307	25.5	10
661572	309	25.6667	10
516621	311	25.8333	10
764027	313	26	10
505110	315	26.1667	10
487565	317	26.3333	10
512463	319	26.5	10
444093	321	26.6667	10
517010	323	26.8333	10
614529	325	27	10
411842	327	27.1667	10
425152	329	27.3333	10
513749	331	27.5	10
487761	333	27.6667	10
517056	335	27.8333	10
556224	337	28	10
424471	339	28.1667	10
466045	341	28.3333	10
470522	343	28.5	10
408999	345	28.6667	10
478790	347	28.8333	10
617472	349	29	10
564363	351	29.1667	10
741861	353	29.3333	10
544734	355	29.5	10
540047	357	29.6667	10
597534	359	29.8333	10
685967	361	30	10
594410	363	30.1667	10
436777	365	30.3333	10
584292	367	30.5	10
622544	369	30.6667	10
566558	371	30.8333	10
590672	373	31	10
484801	375	31.1667	10
448057	377	31.3333	10
650583	379	31.5	10
473218	381	31.6667	10
628561	383	31.8333	10
525670	385	32	10
517931	387	32.1667	10
588879	389	32.3333	10
603207	391	32.5	10
500473	393	32.6667	10
566594	395	32.8333	10
695057	397	33	10
686928	399	33.1667	10
509975	401	33.3333	10
684001	405	33.6667	10
658513	407	33.8333	10
522858	409	34	10
641943	411	34.1667	10
626838	413	34.3333	10
603907	415	34.5	10
627070	417	34.6667	10
584371	419	34.8333	10
592952	421	35	10
554072	423	35.1667	10
588667	425	35.3333	10
558383	427	35.5	10
519806	429	35.6667	10
99608.7	57	4.66667	100
69355.9	59	4.83333	100
85721	61	5	100
67246.5	63	5.16667	100
58799.3	65	5.33333	100
57730.2	67	5.5	100
59818.3	69	5.66667	100
50501	71	5.83333	100
52266.5	73	6	100
50144.4	75	6.16667	100
46036.7	77	6.33333	100
48059.7	79	6.5	100
42769.7	81	6.66667	100
39707	83	6.83333	100
36109.7	85	7	100
37969.4	87	7.16667	100
40288.7	89	7.33333	100
32984.1	91	7.5	100
37672.7	93	7.66667	100
44106	95	7.83333	100
41557.9	97	8	100
36294.8	99	8.16667	100
32477.9	101	8.33333	100
35116.2	103	8.5	100
31244.7	105	8.66667	100
30886.2	107	8.83333	100
33923.5	109	9	100
30511.4	111	9.16667	100
27047.2	113	9.33333	100
35610.9	115	9.5	100
40516.8	117	9.66667	100
36208.4	119	9.83333	100
37785.2	121	10	100
39367.2	123	10.1667	100
41335.4	125	10.3333	100
47033.2	127	10.5	100
49038	129	10.6667	100
53029.2	131	10.8333	100
63107.6	133	11	100
65797.8	135	11.1667	100
61960.6	137	11.3333	100
74968.5	139	11.5	100
92788.6	141	11.6667	100
84913.7	143	11.8333	100
102398	145	12	100
98747.6	147	12.1667	100
105436	149	12.3333	100
125564	151	12.5	100
132677	153	12.6667	100
125689	155	12.8333	100
172842	157	13	100
148529	159	13.1667	100
163698	161	13.3333	100
135685	163	13.5	100
150387	165	13.6667	100
127416	167	13.8333	100
183776	169	14	100
218076	171	14.1667	100
173242	173	14.3333	100
186057	175	14.5	100
226703	177	14.6667	100
245342	179	14.8333	100
219209	181	15	100
271193	183	15.1667	100
273612	185	15.3333	100
257933	187	15.5	100
281466	189	15.6667	100
284876	191	15.8333	100
333009	193	16	100
229626	195	16.1667	101
166965	197	16.3333	101
169068	199	16.5	101
196541	201	16.6667	101
213926	203	16.8333	101
181848	205	17	101
247458	207	17.1667	101
301193	209	17.3333	101
259513	211	17.5	101
279093	213	17.6667	101
220269	215	17.8333	101
289138	217	18	101
313456	219	18.1667	101
276471	221	18.3333	101
278623	223	18.5	101
266446	225	18.6667	101
305512	227	18.8333	101
370134	229	19	101
262648	231	19.1667	101
275824	233	19.3333	101
374855	235	19.5	101
403323	237	19.6667	101
334795	239	19.8333	101
348899	241	20	101
323236	243	20.1667	101
436463	245	20.3333	101
360198	247	20.5	101
414642	249	20.6667	101
387276	251	20.8333	101
355030	253	21	101
344702	255	21.1667	101
461986	257	21.3333	101
698037	259	21.5	101
439809	261	21.6667	101
368871	263	21.8333	101
304196	265	22	101
442158	267	22.1667	101
392964	269	22.3333	101
471228	271	22.5	101
490133	273	22.6667	101
268715	275	22.8333	101
411767	277	23	101
606991	279	23.1667	101
497611	281	23.3333	101
715508	283	23.5	101
678466	285	23.6667	101
623549	287	23.8333	101
503943	289	24	101
627789	291	24.1667	101
751764	293	24.3333	101
489745	295	24.5	101
533518	297	24.6667	101
657726	299	24.8333	101
453779	301	25	101
460279	303	25.1667	101
540618	305	25.3333	101
722687	307	25.5	101
446268	309	25.6667	101
489206	311	25.8333	101
887825	313	26	101
659823	315	26.1667	101
603950	317	26.3333	101
503566	319	26.5	101
492651	321	26.6667	101
457547	323	26.8333	101
461607	325	27	101
410454	327	27.1667	101
268238	195	16.1667	102
197706	197	16.3333	102
207527	199	16.5	102
246983	201	16.6667	102
207754	203	16.8333	102
259254	205	17	102
302445	207	17.1667	102
300855	209	17.3333	102
236668	211	17.5	102
328590	213	17.6667	102
303621	215	17.8333	102
287722	217	18	102
263124	219	18.1667	102
274294	221	18.3333	102
327823	223	18.5	102
439812	225	18.6667	102
361491	227	18.8333	102
351674	229	19	102
441755	231	19.1667	102
345509	233	19.3333	102
398037	235	19.5	102
402004	237	19.6667	102
357606	239	19.8333	102
362564	241	20	102
433956	243	20.1667	102
343198	245	20.3333	102
508900	247	20.5	102
490237	249	20.6667	102
391423	251	20.8333	102
395173	253	21	102
468181	255	21.1667	102
385568	257	21.3333	102
548600	259	21.5	102
556723	261	21.6667	102
482209	263	21.8333	102
501464	265	22	102
464088	267	22.1667	102
645328	269	22.3333	102
543051	271	22.5	102
548848	273	22.6667	102
621169	275	22.8333	102
314903	277	23	102
360073	279	23.1667	102
341980	281	23.3333	102
377933	283	23.5	102
459047	285	23.6667	102
401031	287	23.8333	102
506092	289	24	102
440474	291	24.1667	102
481928	293	24.3333	102
322648	295	24.5	102
433064	297	24.6667	102
424385	299	24.8333	102
380502	301	25	102
382415	303	25.1667	102
324989	305	25.3333	102
380986	307	25.5	102
444489	309	25.6667	102
416315	311	25.8333	102
470075	313	26	102
523880	315	26.1667	102
468532	317	26.3333	102
558100	319	26.5	102
248987	53	4.33333	103
247274	55	4.5	103
228349	57	4.66667	103
184689	59	4.83333	103
184540	61	5	103
153271	63	5.16667	103
158075	65	5.33333	103
160367	67	5.5	103
159047	69	5.66667	103
143847	71	5.83333	103
129459	73	6	103
139968	75	6.16667	103
134955	77	6.33333	103
129173	79	6.5	103
97100.3	81	6.66667	103
128066	83	6.83333	103
117287	85	7	103
123815	87	7.16667	103
107317	89	7.33333	103
113681	91	7.5	103
116971	93	7.66667	103
128923	95	7.83333	103
113660	97	8	103
113174	99	8.16667	103
107616	101	8.33333	103
110262	103	8.5	103
95503.9	105	8.66667	103
105719	107	8.83333	103
97460.2	109	9	103
105517	111	9.16667	103
93079	113	9.33333	103
102862	115	9.5	103
104754	117	9.66667	103
99532.9	119	9.83333	103
96963.5	121	10	103
107907	123	10.1667	103
118067	125	10.3333	103
132749	127	10.5	103
112328	129	10.6667	103
122763	131	10.8333	103
127320	133	11	103
140455	135	11.1667	103
154930	137	11.3333	103
191241	139	11.5	103
176566	141	11.6667	103
195583	143	11.8333	103
211567	145	12	103
225645	147	12.1667	103
234565	149	12.3333	103
255510	151	12.5	103
252611	153	12.6667	103
301785	155	12.8333	103
290776	157	13	103
292998	159	13.1667	103
360039	161	13.3333	103
401303	163	13.5	103
410332	165	13.6667	103
411125	167	13.8333	103
408789	169	14	103
399268	171	14.1667	103
522029	173	14.3333	103
531845	175	14.5	103
494415	177	14.6667	103
455919	179	14.8333	103
481880	181	15	103
565358	183	15.1667	103
487550	185	15.3333	103
410686	187	15.5	103
473190	189	15.6667	103
567456	191	15.8333	103
547795	193	16	103
558111	195	16.1667	103
574327	197	16.3333	103
603208	199	16.5	103
559622	201	16.6667	103
668874	203	16.8333	103
582436	205	17	103
644888	207	17.1667	103
589923	209	17.3333	103
683740	211	17.5	103
624326	213	17.6667	103
610319	215	17.8333	103
709454	217	18	103
752533	219	18.1667	103
706642	221	18.3333	103
730443	223	18.5	103
778105	225	18.6667	103
623334	227	18.8333	104
708179	229	19	104
623263	231	19.1667	104
641902	233	19.3333	104
620708	235	19.5	104
528898	237	19.6667	104
602950	239	19.8333	104
560793	241	20	104
553956	243	20.1667	104
542765	245	20.3333	104
545351	247	20.5	104
597193	249	20.6667	104
608164	251	20.8333	104
568205	253	21	104
737413	255	21.1667	104
694426	257	21.3333	104
600617	259	21.5	104
688035	261	21.6667	104
609092	263	21.8333	104
663818	265	22	104
591818	267	22.1667	104
600288	269	22.3333	104
483642	271	22.5	104
485421	273	22.6667	104
532330	275	22.8333	104
683984	277	23	104
550862	279	23.1667	104
590089	281	23.3333	104
683879	283	23.5	104
660677	285	23.6667	104
683189	287	23.8333	104
968304	289	24	104
596139	291	24.1667	104
666954	293	24.3333	104
839868	295	24.5	104
830299	297	24.6667	104
787363	299	24.8333	104
796883	301	25	104
795348	303	25.1667	104
1218468	305	25.3333	104
1.00616e+06	307	25.5	104
924445	309	25.6667	104
790056	311	25.8333	104
1.21479e+06	313	26	104
834708	315	26.1667	104
895114	317	26.3333	104
840016	319	26.5	104
993283	321	26.6667	104
802122	323	26.8333	104
1.07786e+06	325	27	104
1.1348e+06	327	27.1667	104
1.10859e+06	329	27.3333	104
971219	331	27.5	104
1114110	333	27.6667	104
1.07626e+06	335	27.8333	104
1.06247e+06	337	28	104
1.04503e+06	339	28.1667	104
1.05767e+06	341	28.3333	104
1.12933e+06	343	28.5	104
952563	345	28.6667	104
988343	347	28.8333	104
1.34609e+06	349	29	104
1.09672e+06	351	29.1667	104
1.23786e+06	353	29.3333	104
433737	227	18.8333	105
497772	229	19	105
516215	231	19.1667	105
417789	233	19.3333	105
705770	235	19.5	105
362947	237	19.6667	105
324632	239	19.8333	105
536705	241	20	105
425505	243	20.1667	105
449927	245	20.3333	105
668719	247	20.5	105
560716	249	20.6667	105
457093	251	20.8333	105
611366	253	21	105
553939	255	21.1667	105
688671	257	21.3333	105
662139	259	21.5	105
658963	261	21.6667	105
614971	263	21.8333	105
666915	265	22	105
608334	267	22.1667	105
592226	269	22.3333	105
660445	271	22.5	105
611221	273	22.6667	105
605251	275	22.8333	105
587345	277	23	105
759406	279	23.1667	105
703538	281	23.3333	105
658676	283	23.5	105
859368	285	23.6667	105
554410	287	23.8333	105
685325	289	24	105
750059	291	24.1667	105
665306	293	24.3333	105
799706	295	24.5	105
803947	297	24.6667	105
1.03892e+06	299	24.8333	105
1086758	301	25	105
1.08363e+06	303	25.1667	105
1.12355e+06	305	25.3333	105
809764	307	25.5	105
912110	309	25.6667	105
1.20019e+06	311	25.8333	105
917993	313	26	105
1.06265e+06	315	26.1667	105
968912	317	26.3333	105
1.05786e+06	319	26.5	105
1.1394e+06	321	26.6667	105
994826	323	26.8333	105
1.28966e+06	325	27	105
1.20495e+06	327	27.1667	105
883355	329	27.3333	105
979278	331	27.5	105
1.35253e+06	333	27.6667	105
1.09384e+06	335	27.8333	105
940508	337	28	105
1.2466e+06	339	28.1667	105
1.2755e+06	341	28.3333	105
1.22723e+06	343	28.5	105
1.39895e+06	345	28.6667	105
1.13772e+06	347	28.8333	105
1.10541e+06	349	29	105
1.06518e+06	351	29.1667	105
1.17326e+06	353	29.3333	105
1088350	355	29.5	105
687842	355	29.5	106
939640	357	29.6667	106
654805	359	29.8333	106
656401	361	30	106
1.01799e+06	363	30.1667	106
1025734	365	30.3333	106
858093	367	30.5	106
835452	369	30.6667	106
904482	371	30.8333	106
1.09821e+06	373	31	106
978102	375	31.1667	106
838739	377	31.3333	106
876691	379	31.5	106
1.14455e+06	381	31.6667	106
957774	383	31.8333	106
962107	385	32	106
817860	387	32.1667	106
900422	389	32.3333	106
989431	391	32.5	106
839602	393	32.6667	106
845381	395	32.8333	106
918790	397	33	106
929321	399	33.1667	106
740480	401	33.3333	106
891966	403	33.5	106
736420	405	33.6667	106
690415	407	33.8333	106
677156	409	34	106
563773	411	34.1667	106
801773	413	34.3333	106
607635	415	34.5	106
606611	417	34.6667	106
538725	419	34.8333	106
586278	421	35	106
652348	423	35.1667	106
539654	425	35.3333	106
516378	427	35.5	106
650319	355	29.5	107
634023	357	29.6667	107
560988	359	29.8333	107
602860	361	30	107
654852	363	30.1667	107
571472	365	30.3333	107
707753	367	30.5	107
794485	369	30.6667	107
728528	371	30.8333	107
910936	373	31	107
640163	375	31.1667	107
784649	377	31.3333	107
981361	379	31.5	107
838683	381	31.6667	107
1.23706e+06	383	31.8333	107
873368	385	32	107
838046	387	32.1667	107
735351	389	32.3333	107
809014	391	32.5	107
627520	393	32.6667	107
667978	395	32.8333	107
582252	397	33	107
488868	399	33.1667	107
461748	401	33.3333	107
432470	403	33.5	107
373019	405	33.6667	107
311303	407	33.8333	107
355447	409	34	107
385303	411	34.1667	107
350520	413	34.3333	107
251327	415	34.5	107
318921	417	34.6667	107
331878	419	34.8333	107
281085	421	35	107
221686	423	35.1667	107
351392	425	35.3333	107
249931	427	35.5	107
471163	357	29.6667	108
629182	359	29.8333	108
653664	361	30	108
642740	363	30.1667	108
805639	365	30.3333	108
944144	367	30.5	108
639506	369	30.6667	108
798314	371	30.8333	108
722591	373	31	108
766175	375	31.1667	108
715382	377	31.3333	108
743911	379	31.5	108
621537	381	31.6667	108
665727	383	31.8333	108
683727	385	32	108
626388	387	32.1667	108
977476	389	32.3333	108
949441	391	32.5	108
1.3044e+06	393	32.6667	108
1.34226e+06	395	32.8333	108
1.10898e+06	397	33	108
1195274	399	33.1667	108
1.33329e+06	401	33.3333	108
1464914	403	33.5	108
1562864	405	33.6667	108
1.9346e+06	407	33.8333	108
1072862	409	34	108
1706346	411	34.1667	108
1.39576e+06	413	34.3333	108
1581202	415	34.5	108
844847	417	34.6667	108
1.58228e+06	419	34.8333	108
1.59921e+06	421	35	108
1.08855e+06	423	35.1667	108
1.66643e+06	425	35.3333	108
1.73337e+06	427	35.5	108
679605	357	29.6667	109
724173	359	29.8333	109
727935	361	30	109
603120	363	30.1667	109
694896	365	30.3333	109
737305	367	30.5	109
694383	369	30.6667	109
849361	371	30.8333	109
1.02155e+06	373	31	109
864624	375	31.1667	109
842416	377	31.3333	109
1.19483e+06	379	31.5	109
1120152	381	31.6667	109
857253	383	31.8333	109
950603	385	32	109
1.02365e+06	387	32.1667	109
911654	389	32.3333	109
1.26731e+06	391	32.5	109
1.39572e+06	393	32.6667	109
1.69402e+06	395	32.8333	109
1.63882e+06	397	33	109
1.31257e+06	399	33.1667	109
1.85021e+06	401	33.3333	109
1.46557e+06	403	33.5	109
1.68794e+06	405	33.6667	109
1.83889e+06	407	33.8333	109
1959791	409	34	109
1.75785e+06	411	34.1667	109
1825718	413	34.3333	109
1.73515e+06	415	34.5	109
1.8815e+06	417	34.6667	109
1663111	419	34.8333	109
1614244	421	35	109
1824005	423	35.1667	109
1.87674e+06	425	35.3333	109
1.74413e+06	427	35.5	109
141190	29	2.33333	11
242743	31	2.5	11
277196	33	2.66667	11
256253	35	2.83333	11
324718	37	3	11
253931	39	3.16667	11
259242	41	3.33333	11
292767	43	3.5	11
268418	45	3.66667	11
232600	47	3.83333	11
269103	49	4	11
224595	51	4.16667	11
209100	53	4.33333	11
122455	55	4.5	11
226055	57	4.66667	11
232167	59	4.83333	11
158566	61	5	11
197801	63	5.16667	11
203177	65	5.33333	11
174318	67	5.5	11
208320	69	5.66667	11
170542	71	5.83333	11
159400	73	6	11
158927	75	6.16667	11
165233	77	6.33333	11
168556	79	6.5	11
146676	81	6.66667	11
149562	83	6.83333	11
145357	85	7	11
142259	87	7.16667	11
135445	89	7.33333	11
137245	91	7.5	11
135878	93	7.66667	11
112252	95	7.83333	11
117780	97	8	11
125111	99	8.16667	11
127883	101	8.33333	11
131880	103	8.5	11
123715	105	8.66667	11
115902	107	8.83333	11
115874	109	9	11
112402	111	9.16667	11
100369	113	9.33333	11
108115	115	9.5	11
96717.4	117	9.66667	11
92033.5	119	9.83333	11
100116	121	10	11
89567.7	125	10.3333	11
105530	127	10.5	11
109369	129	10.6667	11
95091.4	131	10.8333	11
105286	133	11	11
98062.8	135	11.1667	11
119062	137	11.3333	11
110434	139	11.5	11
90657.1	141	11.6667	11
111992	143	11.8333	11
137492	145	12	11
149885	147	12.1667	11
172600	149	12.3333	11
179696	151	12.5	11
186184	153	12.6667	11
170454	155	12.8333	11
190269	157	13	11
207740	159	13.1667	11
221409	163	13.5	11
206385	165	13.6667	11
205171	167	13.8333	11
252259	169	14	11
247461	171	14.1667	11
229500	173	14.3333	11
231499	175	14.5	11
214458	177	14.6667	11
240955	179	14.8333	11
226443	181	15	11
250120	183	15.1667	11
242741	185	15.3333	11
244872	187	15.5	11
303773	189	15.6667	11
363781	191	15.8333	11
313659	193	16	11
311116	195	16.1667	11
378084	197	16.3333	11
301764	199	16.5	11
329806	201	16.6667	11
532448	203	16.8333	11
330754	205	17	11
579281	207	17.1667	11
432787	209	17.3333	11
497938	211	17.5	11
376292	215	17.8333	11
527450	217	18	11
441054	221	18.3333	11
493200	225	18.6667	11
506707	227	18.8333	11
542956	229	19	11
521796	231	19.1667	11
644699	233	19.3333	11
653970	235	19.5	11
41244.6	81	6.66667	110
46956.6	83	6.83333	110
59279.8	85	7	110
44839	87	7.16667	110
94612.2	89	7.33333	110
92227.8	91	7.5	110
75117.8	93	7.66667	110
99987.3	95	7.83333	110
89611.6	97	8	110
90490.1	99	8.16667	110
84422	101	8.33333	110
79041.7	103	8.5	110
71973.9	105	8.66667	110
94713.7	107	8.83333	110
92412.1	109	9	110
103397	111	9.16667	110
99335	113	9.33333	110
96722.8	115	9.5	110
111944	117	9.66667	110
95761.9	119	9.83333	110
85634.5	121	10	110
91960.8	123	10.1667	110
84954	125	10.3333	110
100289	127	10.5	110
91294.4	129	10.6667	110
104281	131	10.8333	110
104178	133	11	110
106491	135	11.1667	110
106792	137	11.3333	110
106259	139	11.5	110
103471	141	11.6667	110
105404	143	11.8333	110
104200	145	12	110
97395	147	12.1667	110
106218	149	12.3333	110
86063.2	151	12.5	110
74178.2	153	12.6667	110
95803.9	155	12.8333	110
100444	157	13	110
92879.5	159	13.1667	110
101652	161	13.3333	110
108873	163	13.5	110
113156	165	13.6667	110
119573	167	13.8333	110
139189	169	14	110
155974	171	14.1667	110
144208	173	14.3333	110
187671	175	14.5	110
180243	177	14.6667	110
200304	179	14.8333	110
207511	181	15	110
219945	183	15.1667	110
304055	185	15.3333	110
243077	187	15.5	110
263403	189	15.6667	110
271577	191	15.8333	110
267074	193	16	110
346819	195	16.1667	110
302693	197	16.3333	110
307645	199	16.5	110
390360	201	16.6667	110
331449	203	16.8333	110
331776	205	17	110
394664	207	17.1667	110
364052	209	17.3333	110
432005	211	17.5	110
363866	213	17.6667	110
390137	215	17.8333	110
394466	217	18	110
451608	219	18.1667	110
445323	221	18.3333	110
397179	223	18.5	110
318317	225	18.6667	110
431060	227	18.8333	110
447092	229	19	110
329023	231	19.1667	110
377166	233	19.3333	110
391220	235	19.5	110
440099	237	19.6667	110
384708	239	19.8333	110
399759	241	20	110
395452	243	20.1667	110
524037	245	20.3333	110
557212	247	20.5	110
30352.6	82	6.75	111
30954.5	84	6.91667	111
32023.6	87	7.16667	111
30244.9	89	7.33333	111
28079	91	7.5	111
29057.1	93	7.66667	111
37316.1	95	7.83333	111
40976.5	97	8	111
33441.8	99	8.16667	111
27457.3	101	8.33333	111
30933.4	103	8.5	111
34740.2	105	8.66667	111
35392.3	107	8.83333	111
22607.6	109	9	111
23584.8	111	9.16667	111
34940.3	113	9.33333	111
19668	115	9.5	111
23637.2	117	9.66667	111
14318.8	119	9.83333	111
28802	121	10	111
33124.2	123	10.1667	111
32639.8	125	10.3333	111
33158.3	127	10.5	111
34614.1	129	10.6667	111
35503.8	131	10.8333	111
32708.4	133	11	111
32000.2	135	11.1667	111
33526.8	137	11.3333	111
31411.9	139	11.5	111
35106.2	141	11.6667	111
34083.6	143	11.8333	111
39398.4	145	12	111
30515.3	147	12.1667	111
32271.4	149	12.3333	111
38401.3	151	12.5	111
30329.2	153	12.6667	111
35704	155	12.8333	111
29413.9	157	13	111
31181.4	159	13.1667	111
31787	161	13.3333	111
32634.8	163	13.5	111
36311.8	165	13.6667	111
35594.5	167	13.8333	111
38874.1	169	14	111
35942.6	171	14.1667	111
44628.3	173	14.3333	111
61461.5	175	14.5	111
44077.3	177	14.6667	111
47378.7	179	14.8333	111
48945.3	181	15	111
55707.8	183	15.1667	111
66561.6	185	15.3333	111
66960.5	187	15.5	111
68013.3	189	15.6667	111
61344	191	15.8333	111
78227.8	193	16	111
103478	195	16.1667	111
58388.4	197	16.3333	111
71987.8	199	16.5	111
67172	201	16.6667	111
78381.7	203	16.8333	111
68457.8	205	17	111
54249.2	207	17.1667	111
71801.2	209	17.3333	111
68746.5	211	17.5	111
89746.8	213	17.6667	111
72837.1	215	17.8333	111
54057.3	217	18	111
54515.3	219	18.1667	111
67934.2	220	18.25	111
63275.2	221	18.3333	111
67067.9	223	18.5	111
55665	225	18.6667	111
78459.9	227	18.8333	111
66951.2	229	19	111
61301.6	231	19.1667	111
61749.5	233	19.3333	111
71494.1	235	19.5	111
82725.9	237	19.6667	111
71969.6	239	19.8333	111
71215.8	241	20	111
78244.6	243	20.1667	111
74825.7	245	20.3333	111
62294.2	247	20.5	111
81784.1	249	20.6667	111
108698	251	20.8333	111
82324.9	253	21	111
88071.6	255	21.1667	111
100418	257	21.3333	111
105312	259	21.5	111
111164	261	21.6667	111
123712	263	21.8333	111
150802	265	22	111
142800	267	22.1667	111
206183	269	22.3333	111
147798	271	22.5	111
156780	273	22.6667	111
160634	275	22.8333	111
206333	277	23	111
187568	279	23.1667	111
250853	281	23.3333	111
267990	283	23.5	111
370543	285	23.6667	111
275200	287	23.8333	111
283578	289	24	111
336018	291	24.1667	111
322930	295	24.5	111
219459	297	24.6667	111
241732	299	24.8333	111
272774	301	25	111
424850	303	25.1667	111
483583	305	25.3333	111
455434	307	25.5	111
523380	309	25.6667	111
454416	311	25.8333	111
398853	313	26	111
405878	315	26.1667	111
536585	317	26.3333	111
487563	319	26.5	111
552856	321	26.6667	111
604382	323	26.8333	111
504531	325	27	111
366229	327	27.1667	111
601681	329	27.3333	111
680357	331	27.5	111
562158	333	27.6667	111
444004	335	27.8333	111
563918	337	28	111
511410	339	28.1667	111
606638	341	28.3333	111
609827	343	28.5	111
611754	345	28.6667	111
631881	347	28.8333	111
537722	349	29	111
593553	351	29.1667	111
544450	353	29.3333	111
552514	355	29.5	111
610086	357	29.6667	111
723309	359	29.8333	111
503186	361	30	111
419678	363	30.1667	111
500439	365	30.3333	111
602238	367	30.5	111
655029	369	30.6667	111
559537	371	30.8333	111
613695	373	31	111
798053	375	31.1667	111
707381	377	31.3333	111
830299	379	31.5	111
927342	381	31.6667	111
682857	383	31.8333	111
707864	385	32	111
622097	387	32.1667	111
570529	389	32.3333	111
678915	391	32.5	111
477500	393	32.6667	111
776849	395	32.8333	111
447916	397	33	111
468341	399	33.1667	111
532728	401	33.3333	111
487141	403	33.5	111
698168	405	33.6667	111
672282	407	33.8333	111
605874	409	34	111
480166	411	34.1667	111
533396	413	34.3333	111
532549	415	34.5	111
433425	417	34.6667	111
601310	419	34.8333	111
709904	421	35	111
765152	423	35.1667	111
698908	425	35.3333	111
834505	427	35.5	111
70785.8	67	5.5	112
68909.6	69	5.66667	112
71573.9	71	5.83333	112
75088.7	73	6	112
73196.9	75	6.16667	112
73522.1	77	6.33333	112
65319.5	79	6.5	112
63415.4	81	6.66667	112
62769.2	83	6.83333	112
60015.1	85	7	112
62168.3	87	7.16667	112
64871.4	89	7.33333	112
55872	91	7.5	112
63530.7	93	7.66667	112
61391.7	95	7.83333	112
59543	97	8	112
53432.8	99	8.16667	112
57492	101	8.33333	112
52236.6	103	8.5	112
58385.3	105	8.66667	112
57548.2	107	8.83333	112
55500.8	109	9	112
67061.2	111	9.16667	112
65451.1	113	9.33333	112
72779.9	115	9.5	112
80333.1	117	9.66667	112
67747.6	119	9.83333	112
80380.2	121	10	112
99077.5	123	10.1667	112
106589	125	10.3333	112
113651	127	10.5	112
114869	129	10.6667	112
112836	131	10.8333	112
119545	133	11	112
145817	135	11.1667	112
146556	137	11.3333	112
212453	139	11.5	112
185816	141	11.6667	112
215872	143	11.8333	112
223691	145	12	112
252648	147	12.1667	112
268641	149	12.3333	112
302755	151	12.5	112
378966	153	12.6667	112
343096	155	12.8333	112
334454	157	13	112
343567	159	13.1667	112
393011	161	13.3333	112
427665	163	13.5	112
417835	165	13.6667	112
437169	167	13.8333	112
449824	169	14	112
425879	171	14.1667	112
603465	173	14.3333	112
577841	175	14.5	112
544856	177	14.6667	112
368590	179	14.8333	113
342112	181	15	113
395674	183	15.1667	113
414712	185	15.3333	113
476261	187	15.5	113
437403	189	15.6667	113
315732	191	15.8333	113
531875	193	16	113
518595	195	16.1667	113
622127	197	16.3333	113
452495	199	16.5	113
603925	201	16.6667	113
484338	203	16.8333	113
625631	205	17	113
622093	207	17.1667	113
726206	209	17.3333	113
581548	211	17.5	113
592693	213	17.6667	113
958060	215	17.8333	113
547964	217	18	113
603075	219	18.1667	113
699328	221	18.3333	113
564488	223	18.5	113
654506	225	18.6667	113
512253	227	18.8333	113
719840	230	19.0833	113
602420	232	19.25	113
596853	234	19.4167	113
786089	236	19.5833	113
1.01799e+06	238	19.75	113
637240	240	19.9167	113
854012	242	20.0833	113
704351	244	20.25	113
807951	246	20.4167	113
982505	248	20.5833	113
658672	250	20.75	113
939003	252	20.9167	113
854016	254	21.0833	113
615010	256	21.25	113
658655	258	21.4167	113
667264	260	21.5833	113
904145	262	21.75	113
606858	264	21.9167	113
675025	266	22.0833	113
819704	268	22.25	113
818871	270	22.4167	113
856845	272	22.5833	113
718436	274	22.75	113
837523	276	22.9167	113
870637	278	23.0833	113
819616	280	23.25	113
1.03835e+06	282	23.4167	113
821991	284	23.5833	113
845045	286	23.75	113
684190	288	23.9167	113
765335	290	24.0833	113
874940	292	24.25	113
1.07307e+06	294	24.4167	113
794959	296	24.5833	113
901993	298	24.75	113
1.08897e+06	300	24.9167	113
1001080	302	25.0833	113
823045	304	25.25	113
1.41809e+06	306	25.4167	113
908232	307	25.5	113
873850	309	25.6667	113
980745	311	25.8333	113
898135	313	26	113
844759	315	26.1667	113
1.03998e+06	317	26.3333	113
975976	319	26.5	113
878167	321	26.6667	113
977067	323	26.8333	113
950163	325	27	113
1.12463e+06	327	27.1667	113
963610	329	27.3333	113
877178	331	27.5	113
995559	333	27.6667	113
842679	335	27.8333	113
838548	337	28	113
1.00407e+06	339	28.1667	113
1.20175e+06	341	28.3333	113
947478	343	28.5	113
272816	179	14.8333	114
315170	181	15	114
353660	183	15.1667	114
452464	185	15.3333	114
367357	187	15.5	114
334985	189	15.6667	114
310264	191	15.8333	114
307276	193	16	114
369302	195	16.1667	114
438590	197	16.3333	114
463285	199	16.5	114
460938	201	16.6667	114
496072	203	16.8333	114
495896	205	17	114
477227	207	17.1667	114
576015	209	17.3333	114
547151	211	17.5	114
777315	213	17.6667	114
713122	215	17.8333	114
778080	217	18	114
749240	219	18.1667	114
660519	221	18.3333	114
673562	223	18.5	114
715591	225	18.6667	114
708144	227	18.8333	114
889140	229	19	114
955338	231	19.1667	114
633165	233	19.3333	114
824613	235	19.5	114
1.0433e+06	237	19.6667	114
829094	239	19.8333	114
1.07954e+06	241	20	114
1.00888e+06	243	20.1667	114
855798	245	20.3333	114
982483	247	20.5	114
955900	249	20.6667	114
1.07723e+06	251	20.8333	114
1138087	253	21	114
917085	255	21.1667	114
939370	257	21.3333	114
897036	259	21.5	114
998642	261	21.6667	114
1205557	263	21.8333	114
1.11913e+06	265	22	114
971539	267	22.1667	114
917786	269	22.3333	114
891593	271	22.5	114
1.10023e+06	273	22.6667	114
1.06905e+06	275	22.8333	114
867063	277	23	114
893849	279	23.1667	114
1.0373e+06	281	23.3333	114
902429	283	23.5	114
892987	285	23.6667	114
868563	287	23.8333	114
962285	289	24	114
867403	291	24.1667	114
941777	293	24.3333	114
1.10904e+06	295	24.5	114
873732	297	24.6667	114
1.26517e+06	299	24.8333	114
858068	301	25	114
920397	303	25.1667	114
827120	305	25.3333	114
894153	307	25.5	114
1.13239e+06	309	25.6667	114
999560	311	25.8333	114
1.59301e+06	313	26	114
1.12131e+06	315	26.1667	114
930352	317	26.3333	114
979717	319	26.5	114
965367	321	26.6667	114
1.14406e+06	323	26.8333	114
1.045e+06	325	27	114
1.14003e+06	327	27.1667	114
1265270	329	27.3333	114
1.15144e+06	331	27.5	114
1080092	333	27.6667	114
1.23606e+06	335	27.8333	114
1.08206e+06	337	28	114
1.0906e+06	339	28.1667	114
1.13564e+06	341	28.3333	114
1.71021e+06	343	28.5	114
1.4751e+06	345	28.6667	114
1372929	347	28.8333	114
1.19764e+06	349	29	114
1.71163e+06	351	29.1667	114
1333126	353	29.3333	114
1.40187e+06	355	29.5	114
1.80771e+06	357	29.6667	114
1452551	359	29.8333	114
1.3407e+06	361	30	114
1.42242e+06	363	30.1667	114
1.18765e+06	365	30.3333	114
1.40002e+06	367	30.5	114
1274679	369	30.6667	114
1.25291e+06	371	30.8333	114
1241160	373	31	114
1.56485e+06	375	31.1667	114
1.05363e+06	377	31.3333	114
1.38589e+06	379	31.5	114
1.16091e+06	381	31.6667	114
1.264e+06	383	31.8333	114
1.25363e+06	385	32	114
1.18424e+06	387	32.1667	114
1.36495e+06	389	32.3333	114
1.16297e+06	391	32.5	114
1.13694e+06	393	32.6667	114
1168492	395	32.8333	114
1.08517e+06	397	33	114
527890	345	28.6667	115
420152	347	28.8333	115
620955	349	29	115
823604	351	29.1667	115
587904	353	29.3333	115
774163	355	29.5	115
529332	357	29.6667	115
788472	359	29.8333	115
1.09006e+06	361	30	115
845494	363	30.1667	115
888312	365	30.3333	115
1.10223e+06	367	30.5	115
861480	369	30.6667	115
1097090	371	30.8333	115
1494507	373	31	115
1.14711e+06	375	31.1667	115
1.03906e+06	377	31.3333	115
1140961	379	31.5	115
976836	381	31.6667	115
1.02808e+06	383	31.8333	115
1.14201e+06	385	32	115
1.17551e+06	387	32.1667	115
970957	389	32.3333	115
1.08829e+06	391	32.5	115
1.33238e+06	393	32.6667	115
897248	395	32.8333	115
970508	397	33	115
1.25312e+06	399	33.1667	115
1.36181e+06	401	33.3333	115
1.14419e+06	403	33.5	115
1333511	405	33.6667	115
1.12594e+06	407	33.8333	115
895536	409	34	115
1.38599e+06	411	34.1667	115
1.0704e+06	413	34.3333	115
1.34953e+06	415	34.5	115
840304	417	34.6667	115
882293	419	34.8333	115
876654	421	35	115
1.07699e+06	423	35.1667	115
1.27808e+06	425	35.3333	115
1.00295e+06	427	35.5	115
467679	345	28.6667	116
405989	347	28.8333	116
465026	349	29	116
514651	351	29.1667	116
617100	353	29.3333	116
579754	355	29.5	116
631460	357	29.6667	116
828078	359	29.8333	116
1.10203e+06	361	30	116
819207	363	30.1667	116
920074	365	30.3333	116
1.1419e+06	367	30.5	116
888474	369	30.6667	116
1.10576e+06	371	30.8333	116
1.44931e+06	373	31	116
1.16098e+06	375	31.1667	116
1.02181e+06	377	31.3333	116
1.02138e+06	379	31.5	116
1.05144e+06	381	31.6667	116
1053963	383	31.8333	116
1.1327e+06	385	32	116
1.07452e+06	387	32.1667	116
1.05741e+06	389	32.3333	116
1.23553e+06	391	32.5	116
1.18524e+06	393	32.6667	116
1.01968e+06	395	32.8333	116
1.07505e+06	397	33	116
1094629	399	33.1667	116
1.26996e+06	401	33.3333	116
1.20987e+06	403	33.5	116
1164023	405	33.6667	116
1.08358e+06	407	33.8333	116
1.58297e+06	411	34.1667	116
898274	413	34.3333	116
1.33633e+06	415	34.5	116
692968	417	34.6667	116
900822	419	34.8333	116
948277	421	35	116
1.13621e+06	423	35.1667	116
1.20258e+06	425	35.3333	116
987257	427	35.5	116
569378	399	33.1667	117
623060	401	33.3333	117
868051	403	33.5	117
839125	405	33.6667	117
922572	407	33.8333	117
930920	409	34	117
1.22528e+06	411	34.1667	117
1112775	413	34.3333	117
924126	415	34.5	117
798508	417	34.6667	117
871594	419	34.8333	117
964967	421	35	117
1.06293e+06	423	35.1667	117
1191172	425	35.3333	117
831982	427	35.5	117
1.23687e+06	428	35.5833	117
674645	399	33.1667	118
834014	401	33.3333	118
624807	403	33.5	118
615192	405	33.6667	118
716065	407	33.8333	118
626711	409	34	118
629092	411	34.1667	118
736773	413	34.3333	118
770116	415	34.5	118
706240	417	34.6667	118
883904	419	34.8333	118
754546	421	35	118
911905	423	35.1667	118
656521	425	35.3333	118
821524	427	35.5	118
41822.3	59	4.83333	119
27072.9	61	5	119
32808.4	63	5.16667	119
24219.9	65	5.33333	119
41052.4	67	5.5	119
59316.2	69	5.66667	119
53169.3	71	5.83333	119
33635.8	73	6	119
36752.5	75	6.16667	119
42362	77	6.33333	119
30407.1	79	6.5	119
36674	81	6.66667	119
34209.8	83	6.83333	119
41198.5	85	7	119
39047.1	87	7.16667	119
35235	89	7.33333	119
49282.6	91	7.5	119
54839	93	7.66667	119
55795.2	95	7.83333	119
47718.3	97	8	119
34370.2	99	8.16667	119
29750.3	101	8.33333	119
37083.8	103	8.5	119
51544.6	105	8.66667	119
40482.1	107	8.83333	119
41048.7	109	9	119
42576.9	111	9.16667	119
33504.5	113	9.33333	119
46980.7	115	9.5	119
61504.2	117	9.66667	119
39636	119	9.83333	119
44623.7	121	10	119
49550.6	123	10.1667	119
44199.6	125	10.3333	119
31846.8	127	10.5	119
44271.1	129	10.6667	119
44994.2	131	10.8333	119
36336.8	133	11	119
33912.7	135	11.1667	119
36212.3	137	11.3333	119
33418.5	139	11.5	119
40958.5	141	11.6667	119
35668.8	143	11.8333	119
43913.1	145	12	119
38185.9	147	12.1667	119
52550.3	149	12.3333	119
84368	151	12.5	119
60383.9	153	12.6667	119
70110.9	155	12.8333	119
88707.3	157	13	119
85428.1	159	13.1667	119
93679	161	13.3333	119
116054	163	13.5	119
97646.5	165	13.6667	119
88209.5	167	13.8333	119
87387.5	169	14	119
102788	171	14.1667	119
97413	173	14.3333	119
121492	175	14.5	119
122621	177	14.6667	119
150649	179	14.8333	119
145371	181	15	119
153004	183	15.1667	119
195719	185	15.3333	119
165418	187	15.5	119
175878	189	15.6667	119
116165	191	15.8333	119
230129	193	16	119
235501	195	16.1667	119
203931	197	16.3333	119
270217	199	16.5	119
275077	201	16.6667	119
249200	203	16.8333	119
278580	205	17	119
310359	207	17.1667	119
323264	209	17.3333	119
379487	211	17.5	119
404543	213	17.6667	119
347883	215	17.8333	119
391959	217	18	119
488106	219	18.1667	119
450436	221	18.3333	119
452301	223	18.5	119
497756	225	18.6667	119
533338	227	18.8333	119
596795	229	19	119
740132	231	19.1667	119
510273	233	19.3333	119
471693	235	19.5	119
630643	237	19.6667	119
489735	239	19.8333	119
397586	241	20	119
410295	243	20.1667	119
482950	245	20.3333	119
512468	247	20.5	119
432454	249	20.6667	119
435216	251	20.8333	119
592954	253	21	119
535006	255	21.1667	119
393331	257	21.3333	119
378747	259	21.5	119
383770	261	21.6667	119
344172	263	21.8333	119
373736	265	22	119
318282	267	22.1667	119
488201	269	22.3333	119
476811	271	22.5	119
406337	273	22.6667	119
347270	275	22.8333	119
504126	277	23	119
477164	279	23.1667	119
462147	281	23.3333	119
555694	283	23.5	119
637757	285	23.6667	119
496352	287	23.8333	119
445700	289	24	119
659854	291	24.1667	119
580026	293	24.3333	119
553430	295	24.5	119
575129	297	24.6667	119
723181	299	24.8333	119
555456	301	25	119
528785	303	25.1667	119
688345	305	25.3333	119
666979	307	25.5	119
667553	309	25.6667	119
658930	311	25.8333	119
542974	313	26	119
403596	315	26.1667	119
405778	317	26.3333	119
623448	319	26.5	119
552940	321	26.6667	119
754086	323	26.8333	119
567599	325	27	119
642209	327	27.1667	119
610247	329	27.3333	119
797670	331	27.5	119
592249	333	27.6667	119
730285	335	27.8333	119
729448	337	28	119
750903	339	28.1667	119
714160	341	28.3333	119
785023	343	28.5	119
864423	345	28.6667	119
792697	347	28.8333	119
730602	349	29	119
584098	351	29.1667	119
815548	353	29.3333	119
675264	355	29.5	119
570850	357	29.6667	119
731064	359	29.8333	119
754981	361	30	119
636887	363	30.1667	119
680154	365	30.3333	119
724730	367	30.5	119
730430	369	30.6667	119
732554	371	30.8333	119
512513	373	31	119
703396	375	31.1667	119
755626	377	31.3333	119
824826	379	31.5	119
767875	381	31.6667	119
669496	383	31.8333	119
602727	385	32	119
778025	387	32.1667	119
754503	389	32.3333	119
685790	391	32.5	119
800001	393	32.6667	119
865733	395	32.8333	119
660757	397	33	119
854692	399	33.1667	119
647513	401	33.3333	119
690835	403	33.5	119
818934	405	33.6667	119
697172	407	33.8333	119
750346	409	34	119
719968	411	34.1667	119
1118796	413	34.3333	119
952685	415	34.5	119
974683	417	34.6667	119
905720	419	34.8333	119
1.44925e+06	421	35	119
1.24039e+06	423	35.1667	119
914992	425	35.3333	119
993390	427	35.5	119
356333	237	19.6667	12
408396	239	19.8333	12
422248	241	20	12
555924	243	20.1667	12
505720	245	20.3333	12
543358	247	20.5	12
535548	249	20.6667	12
442138	251	20.8333	12
464304	253	21	12
480900	255	21.1667	12
443583	257	21.3333	12
475593	259	21.5	12
481320	261	21.6667	12
640367	263	21.8333	12
515572	265	22	12
662794	267	22.1667	12
611455	269	22.3333	12
576909	271	22.5	12
614328	273	22.6667	12
752004	275	22.8333	12
657937	277	23	12
566418	279	23.1667	12
845228	281	23.3333	12
768101	283	23.5	12
746919	285	23.6667	12
771133	287	23.8333	12
807448	289	24	12
738329	291	24.1667	12
773694	293	24.3333	12
567330	295	24.5	12
849136	297	24.6667	12
1.06725e+06	299	24.8333	12
744899	301	25	12
732626	303	25.1667	12
705382	307	25.5	12
938296	309	25.6667	12
884233	311	25.8333	12
987340	313	26	12
762536	315	26.1667	12
953364	317	26.3333	12
744061	319	26.5	12
598398	321	26.6667	12
873088	323	26.8333	12
987611	325	27	12
911783	327	27.1667	12
830991	329	27.3333	12
879459	331	27.5	12
841374	333	27.6667	12
796980	335	27.8333	12
781349	337	28	12
683744	339	28.1667	12
890729	341	28.3333	12
804506	343	28.5	12
753939	345	28.6667	12
640180	347	28.8333	12
613462	349	29	12
506007	351	29.1667	12
508408	353	29.3333	12
412772	355	29.5	12
530324	357	29.6667	12
377964	359	29.8333	12
332781	361	30	12
336402	363	30.1667	12
319571	365	30.3333	12
286356	367	30.5	12
311676	369	30.6667	12
291468	371	30.8333	12
264410	373	31	12
243429	375	31.1667	12
227488	377	31.3333	12
218287	379	31.5	12
211585	381	31.6667	12
205359	383	31.8333	12
202236	385	32	12
188860	387	32.1667	12
184676	389	32.3333	12
182113	393	32.6667	12
179462	395	32.8333	12
161262	397	33	12
152231	399	33.1667	12
157680	401	33.3333	12
127793	405	33.6667	12
149095	407	33.8333	12
129643	411	34.1667	12
129657	413	34.3333	12
128671	415	34.5	12
129187	417	34.6667	12
114504	419	34.8333	12
122258	421	35	12
126889	423	35.1667	12
119201	427	35.5	12
117389	429	35.6667	12
90860.2	55	4.5	120
106188	57	4.66667	120
131233	59	4.83333	120
141671	61	5	120
156449	63	5.16667	120
143454	65	5.33333	120
139415	67	5.5	120
122741	69	5.66667	120
108072	71	5.83333	120
120161	73	6	120
116411	75	6.16667	120
107841	77	6.33333	120
108218	79	6.5	120
100312	81	6.66667	120
90817.9	83	6.83333	120
93023.2	85	7	120
87746.7	87	7.16667	120
96296.2	89	7.33333	120
81485	91	7.5	120
86697.5	93	7.66667	120
75513.5	95	7.83333	120
76507.8	97	8	120
65505.7	99	8.16667	120
67056.5	101	8.33333	120
68046.8	103	8.5	120
62290	105	8.66667	120
64013.6	107	8.83333	120
49269.1	109	9	120
58199.7	111	9.16667	120
49620.2	113	9.33333	120
49710.7	115	9.5	120
54486.8	117	9.66667	120
55053.9	119	9.83333	120
47414.5	121	10	120
50505	123	10.1667	120
39453.2	125	10.3333	120
44894.8	127	10.5	120
32649.8	129	10.6667	120
33166.2	131	10.8333	120
29954.1	133	11	120
32406.6	135	11.1667	120
31833.8	137	11.3333	120
32656.3	139	11.5	120
34202.9	141	11.6667	120
37157.5	143	11.8333	120
40097.4	145	12	120
47032.8	147	12.1667	120
48911.5	149	12.3333	120
56328.6	151	12.5	120
51919.2	153	12.6667	120
71898.6	155	12.8333	120
79602.1	157	13	120
97623.9	159	13.1667	120
90210	161	13.3333	120
132739	163	13.5	120
165142	165	13.6667	120
167931	167	13.8333	120
171958	169	14	120
209398	171	14.1667	120
191869	173	14.3333	120
306846	175	14.5	120
211053	177	14.6667	120
233915	179	14.8333	120
280219	181	15	120
276158	183	15.1667	120
285161	185	15.3333	120
282402	187	15.5	120
375315	189	15.6667	120
326334	191	15.8333	120
277791	193	16	120
289581	195	16.1667	120
336234	197	16.3333	120
377711	199	16.5	120
384782	201	16.6667	120
331225	203	16.8333	120
329212	205	17	120
449954	207	17.1667	120
390764	209	17.3333	120
405275	211	17.5	120
473632	213	17.6667	120
563477	215	17.8333	120
536804	217	18	120
429157	219	18.1667	120
253832	221	18.3333	121
291699	223	18.5	121
338361	225	18.6667	121
301640	227	18.8333	121
225294	229	19	121
328620	231	19.1667	121
271799	233	19.3333	121
355458	235	19.5	121
373287	237	19.6667	121
327412	239	19.8333	121
377697	241	20	121
461451	243	20.1667	121
415327	245	20.3333	121
487984	247	20.5	121
474283	249	20.6667	121
417903	251	20.8333	121
530164	253	21	121
508199	255	21.1667	121
385724	257	21.3333	121
355221	259	21.5	121
391014	261	21.6667	121
344172	263	21.8333	121
380555	265	22	121
318282	267	22.1667	121
436646	269	22.3333	121
474938	271	22.5	121
413573	273	22.6667	121
379852	275	22.8333	121
431854	277	23	121
422142	279	23.1667	121
458797	281	23.3333	121
551325	283	23.5	121
630553	285	23.6667	121
496352	287	23.8333	121
449007	289	24	121
412141	291	24.1667	121
605636	293	24.3333	121
554881	295	24.5	121
555016	297	24.6667	121
632149	299	24.8333	121
611306	301	25	121
630770	303	25.1667	121
668891	305	25.3333	121
671114	307	25.5	121
698489	309	25.6667	121
724669	311	25.8333	121
949597	313	26	121
629375	315	26.1667	121
799749	317	26.3333	121
931672	319	26.5	121
872819	321	26.6667	121
769673	323	26.8333	121
658969	325	27	121
621338	327	27.1667	121
781748	329	27.3333	121
812188	331	27.5	121
707820	333	27.6667	121
699874	335	27.8333	121
976404	337	28	121
782174	339	28.1667	121
744395	341	28.3333	121
797234	343	28.5	121
886542	345	28.6667	121
853166	347	28.8333	121
677436	349	29	121
531459	351	29.1667	121
819434	353	29.3333	121
697507	355	29.5	121
577165	357	29.6667	121
795239	359	29.8333	121
737562	361	30	121
636887	363	30.1667	121
680154	365	30.3333	121
1.1041e+06	367	30.5	121
1.02076e+06	369	30.6667	121
717436	371	30.8333	121
916494	373	31	121
1.14638e+06	375	31.1667	121
1270065	377	31.3333	121
1.01346e+06	379	31.5	121
1.0546e+06	381	31.6667	121
1188922	383	31.8333	121
964219	385	32	121
864519	387	32.1667	121
883238	389	32.3333	121
533633	391	32.5	121
808843	393	32.6667	121
780049	395	32.8333	121
809331	397	33	121
780362	399	33.1667	121
635130	401	33.3333	121
713118	403	33.5	121
783816	405	33.6667	121
799804	407	33.8333	121
887291	409	34	121
964576	411	34.1667	121
1091931	413	34.3333	121
964394	415	34.5	121
957604	417	34.6667	121
881910	419	34.8333	121
1263882	421	35	121
1030094	423	35.1667	121
978801	425	35.3333	121
912564	427	35.5	121
266835	221	18.3333	122
275126	223	18.5	122
325328	225	18.6667	122
209486	227	18.8333	122
286318	229	19	122
323485	231	19.1667	122
257037	233	19.3333	122
264197	235	19.5	122
387410	237	19.6667	122
370461	239	19.8333	122
358164	241	20	122
307140	243	20.1667	122
302137	245	20.3333	122
364170	247	20.5	122
590095	249	20.6667	122
500585	251	20.8333	122
432452	253	21	122
554689	255	21.1667	122
512995	257	21.3333	122
804801	259	21.5	122
634313	261	21.6667	122
425422	263	21.8333	122
408855	265	22	122
383959	267	22.1667	122
555502	269	22.3333	122
[truncated: 52,662 more rows]

## Sheet: Act8 cell fate and division
track_id	day	unique family	parent track_id	fate	division time (h)	cell_gen
1	1	1		d	8.66667	parent
2	1	1	1	d	16.8333	daughter
3	1	1	1	d	21	daughter
4	1	1	2	nd		granddaughter
5	1	1	2	d	28.6667	granddaughter
6	1	1	5	nd		great grandaughter
7	1	1	5	nd		great grandaughter
8	1	1	3	nd		granddaughter
9	1	1	3	nd		granddaughter
10	1	2		nd		parent
11	1	3		d	19.5	parent
12	1	3	11	nd		daughter
13	1	3	11	nd		daughter
14	1	4		nd		parent
15	1	5		d	25.3333	parent
16	1	5	15	nd		daughter
17	1	5	15	nd		daughter
18	1	6		nd		parent
19	1	7		d	25	parent
20	1	7	20	e		daughter
21	1	7	20	nd		daughter
22	1	8		d	23.1667	parent
23	1	8	22	nd		daughter
24	1	8	22	e		daughter
25	1	9		d	24.6667	parent
26	1	9	25	nd		daughter
27	1	9	25	nd		daughter
28	1	10		e		parent
29	1	11		nd		parent
30	1	12		nd		parent
31	1	13		nd		parent
32	1	14		d	19	parent
33	1	14	32	nd		daughter
34	1	14	32	nd		daughter
35	1	15		d	20.8333	parent
36	1	15	35	d	32.6667	daughter
37	1	15	35	nd		daughter
38	1	15	36	nd		granddaughter
39	1	15	36	nd		granddaughter
40	1	16		nd		parent
41	1	17		nd		parent
42	1	18		d	23	parent
43	1	18	42	nd		daughter
44	1	18	42	nd		daughter
45	1	19		d	20.5	parent
46	1	19	45	d	32.5	daughter
47	1	19	45	d	29.1667	daughter
48	1	19	46	nd		granddaughter
49	1	19	46	nd		granddaughter
50	1	19	47	nd		granddaughter
51	1	19	47	e		granddaughter
52	1	20		d	22.9167	parent
53	1	20	52	nd		daughter
54	1	20	52	nd		daughter
55	1	21		d	31.5	parent
56	1	21	55	nd		daughter
57	1	21	55	nd		daughter
58	1	22		d	22.3333	parent
59	1	22	58	d	32.8333	daughter
60	1	22	58	d	34.1667	daughter
61	1	22	59	nd		granddaughter
62	1	22	59	nd		granddaughter
63	1	22	60	nd		granddaughter
64	1	22	60	nd		granddaughter
65	1	23		nd		parent
66	1	24		d	18.1667	parent
67	1	24	66	nd		daughter
68	1	24	66	nd		daughter
69	1	25		e		parent
70	1	26		nd		parent
71	1	27		nd		parent
72	1	28		nd		parent
73	1	29		d	18.6667	parent
74	1	29	73	nd		daughter
75	1	29	73	nd		daughter
76	1	30		nd		parent
77	1	31		d	25.3333	parent
78	1	31	77	nd		daughter
79	1	31	77	nd		daughter
80	1	32		nd		parent
81	1	33		nd		parent
82	1	34		nd		parent
83	1	35		nd		parent
84	1	36		d	20.3333	parent
85	1	36	84	e		daughter
86	1	36	84	e		daughter
87	1	37		d	29.6667	parent
88	1	37	87	nd		daughter
89	1	37	87	nd		daughter
90	1	38		d	27.3333	parent
91	1	38	90	e		daughter
92	1	38	90	e		daughter
93	1	39		d	24.5	parent
94	1	39	93	nd		daughter
95	1	39	93	nd		daughter
96	1	40		d	33.6667	parent
97	1	40	96	nd		daughter
98	1	40	96	nd		daughter
99	1	41		e		parent
100	1	42		d	16	parent
101	1	42	100	e		daughter
102	1	42	100	e		daughter
103	1	43		d	18.6667	parent
104	1	43	103	d	29.3333	daughter
105	1	43	103	d	29.5	daughter
106	1	43	104	nd		granddaughter
107	1	43	104	nd		granddaughter
108	1	43	105	nd		granddaughter
109	1	43	105	nd		granddaughter
110	1	44		e		parent
111	1	45		nd		parent
112	1	46		d	14.6667	parent
113	1	46	112	d	28.5	daughter
114	1	46	112	d	33	daughter
115	1	46	113	nd		granddaughter
116	1	46	113	nd		granddaughter
117	1	46	114	nd		granddaughter
118	1	46	114	nd		granddaughter
119	1	47		nd		parent
120	1	48		d	18.1667	parent
121	1	48	120	nd		daughter
122	1	48	120	nd		daughter
123	1	49		d	30.5	parent
124	1	49	123	nd		daughter
125	1	49	123	nd		daughter
126	1	50		nd		parent
127	1	51		nd		parent
128	1	52		d	23	parent
129	1	52	128	nd		daughter
130	1	52	128	e		daughter
131	1	53		nd		parent
132	1	54		nd		parent
133	1	55		nd		parent
134	1	56		d	34.1667	parent
135	1	56	134	nd		daughter
136	1	56	134	nd		daughter
137	1	57		d	18.1667	parent
138	1	57	137	e		daughter
139	1	57	137	nd		daughter
140	1	58		e		parent
141	1	59		nd		parent
142	1	60		d	21.8333	parent
143	1	60	142	d	33.8333	daughter
144	1	60	143	nd		granddaughter
145	1	60	143	nd		granddaughter
146	1	60	142	nd		daughter
147	1	61		d	26.1667	parent
148	1	61	147	nd		daughter
149	1	61	147	nd		daughter
150	1	62		nd		parent
151	1	63		nd		parent
152	1	64		d	26.5	parent
153	1	64	152	nd		daughter
154	1	64	152	nd		daughter
155	1	65		d	23	parent
156	1	65	155	nd		daughter
157	1	65	155	nd		daughter
158	1	66		d	21.3333	parent
159	1	66	158	nd		daughter
160	1	66	158	nd		daughter
161	1	67		e		parent
162	1	68		e		parent
163	2	69		d	17.3333	parent
164	2	69	163	d	24.8333	daughter
165	2	69	164	nd		granddaughter
166	2	69	164	nd		granddaughter
167	2	69	163	nd		daughter
168	2	70		d	17.5	parent
169	2	70	168	d	24.8333	daughter
170	2	70	169	nd		granddaughter
171	2	70	169	nd		granddaughter
172	2	70	168	d	24.8333	daughter
173	2	70	172	nd		granddaughter
174	2	70	172	nd		granddaughter
175	2	71		d	20	parent
176	2	71	175	nd		daughter
177	2	71	175	nd		daughter
178	2	72		d	18.8333	parent
179	2	72	178	nd		daughter
180	2	72	178	nd		daughter
181	2	73		nd		parent
182	2	74		d	19.1667	parent
183	2	74	182	nd		daughter
184	2	74	182	e		daughter
185	2	75		nd		parent
186	2	76		nd		parent
187	2	77		d	17.5	parent
188	2	77	187	d	23	daughter
189	2	77	188	nd		granddaughter
190	2	77	188	e		granddaughter
191	2	77	187	d	22.3333	daughter
192	2	77	191	nd		granddaughter
193	2	77	191	nd		granddaughter
194	2	78		d	17.3333	parent
195	2	78	194	d	23	daughter
196	2	78	195	nd		granddaughter
197	2	78	195	nd		granddaughter
198	2	78	194	d	23	daughter
199	2	78	198	nd		granddaughter
200	2	78	198	nd		granddaughter
201	2	79		d	16.8333	parent
202	2	79	201	e		daughter
203	2	79	201	d	23.5	daughter
204	2	79	203	nd		granddaughter
205	2	79	203	nd		granddaughter
206	2	80		nd		parent
207	2	81		nd		parent
208	2	82		d	13.3333	parent
209	2	82	208	d	22.1667	daughter
210	2	82	209	nd		granddaughter
211	2	82	209	nd		granddaughter
212	2	82	208	d	23.3333	daughter
213	2	82	212	nd		granddaughter
214	2	82	212	nd		granddaughter
215	2	83		e		parent
216	2	84		d	16.1667	parent
217	2	84	216	d	23.5	daughter
218	2	84	217	nd		granddaughter
219	2	84	217	nd		granddaughter
220	2	84	216	e		daughter
221	2	85		d	18	parent
222	2	85	221	nd		daughter
223	2	85	221	nd		daughter
224	2	86		nd		parent
225	2	87		d	24.5	parent
226	2	87	225	e		daughter
227	2	87	225	nd		daughter
228	2	88		nd		parent
229	2	89		nd		parent
230	2	90		nd		parent
231	2	91		d	15.3333	parent
232	2	91	231	d	22.8333	daughter
233	2	91	232	nd		granddaughter
234	2	91	232	nd		granddaughter
235	2	91	231	d	22.6667	daughter
236	2	91	235	nd		granddaughter
237	2	91	235	nd		granddaughter
238	2	92		nd		parent
239	2	93		d	15.3333	parent
240	2	93	239	d	22.1667	daughter
241	2	93	240	e		granddaughter
242	2	93	240	nd		granddaughter
243	2	93	239	d	21.8333	daughter
244	2	93	243	nd		granddaughter
245	2	93	243	nd		granddaughter
246	2	94		d	17.8333	parent
247	2	94	246	d	22.8333	daughter
248	2	94	247	nd		granddaughter
249	2	94	247	nd		granddaughter
250	2	94	246	nd		daughter
251	2	95		d	19.6667	parent
252	2	95	251	nd		daughter
253	2	95	251	d	24.5	daughter
254	2	95	253	nd		granddaughter
255	2	95	253	nd		granddaughter
256	2	96		nd		parent
257	2	97		d	14.5	parent
258	2	97	257	d	22.3333	daughter
259	2	97	257	d	22.3333	daughter
260	2	97	258	nd		granddaughter
261	2	97	258	nd		granddaughter
262	2	97	259	nd		granddaughter
263	2	97	259	nd		granddaughter
264	2	98		d	18.5	parent
265	2	98	264	nd		daughter
266	2	98	264	nd		daughter
267	2	99		d	19.6667	parent
268	2	99	267	nd		daughter
269	2	99	267	nd		daughter
270	2	100		nd		parent
271	2	101		d	17.3333	parent
272	2	101	271	d	23	daughter
273	2	101	272	e		granddaughter
274	2	101	272	e		granddaughter
275	2	101	271	d	24.1667	daughter
276	2	101	275	nd		granddaughter
277	2	101	275	nd		granddaughter
278	2	102		d	15.6667	parent
279	2	102	278	d	23	daughter
280	2	102	279	nd		granddaughter
281	2	102	279	nd		granddaughter
282	2	102	278	d	22.6667	daughter
283	2	102	282	nd		granddaughter
284	2	102	282	nd		granddaughter
285	2	103		d	17.3333	parent
286	2	103	285	nd		daughter
287	2	103	285	e		daughter
288	2	104		nd		parent
289	2	105		d	23.5	parent
290	2	105	289	nd		daughter
291	2	105	289	nd		daughter
292	2	106		nd		parent
293	2	107		nd		parent
294	2	108		d	19.8333	parent
295	2	108	294	nd		daughter
296	2	108	294	nd		daughter
297	2	109		nd		parent
298	2	110		d	24.3333	parent
299	2	110	298	nd		daughter
300	2	110	298	nd		daughter
301	2	111		d	19.1667	parent
302	2	111	301	nd		daughter
303	2	111	301	nd		daughter
304	2	112		nd		parent
305	2	113		d	21.3333	parent
306	2	113	305	nd		daughter
307	2	113	305	nd		daughter
308	2	114		d	17.6667	parent
309	2	114	308	nd		daughter
310	2	114	308	nd		daughter
311	2	115		d	17.1667	parent
312	2	115	311	d	24.6667	daughter
313	2	115	312	nd		granddaughter
314	2	115	312	nd		granddaughter
315	2	115	311	d	24.8333	daughter
316	2	115	315	nd		granddaughter
317	2	115	315	nd		granddaughter
318	2	116		d	11.5	parent
319	2	116	318	d	20.3333	daughter
320	2	116	319	nd		granddaughter
321	2	116	319	nd		granddaughter
322	2	116	318	d	18.3333	daughter
323	2	116	322	d	24.5	granddaughter
324	2	116	323	nd		great grandaughter
325	2	116	323	nd		great grandaughter
326	2	116	322	d	24.6667	granddaughter
327	2	116	326	nd		great grandaughter
328	2	116	326	nd		great grandaughter
329	2	117		nd		parent
330	2	118		d	14.1667	parent
331	2	118	330	d	20.6667	daughter
332	2	118	331	e		granddaughter
333	2	118	331	nd		granddaughter
334	2	118	330	d	20.1667	daughter
335	2	118	334	nd		granddaughter
336	2	118	334	d	24.6667	granddaughter
337	2	118	336	nd		great grandaughter
338	2	118	336	nd		great grandaughter
339	2	119		d	21.1667	parent
340	2	119	339	nd		daughter
341	2	119	339	nd		daughter
342	2	120		d	18	parent
343	2	120	342	d	24	daughter
344	2	120	343	nd		granddaughter
345	2	120	343	nd		granddaughter
346	2	120	342	d	23.3333	daughter
347	2	120	346	nd		granddaughter
348	2	120	346	nd		granddaughter
349	2	121		d	14.1667	parent
350	2	121	349	d	21.8333	daughter
351	2	121	350	nd		granddaughter
352	2	121	350	nd		granddaughter
353	2	121	349	d	20.6667	daughter
354	2	121	353	nd		granddaughter
355	2	121	353	nd		granddaughter
356	2	122		d	14.6667	parent
357	2	122	356	d	20.3333	daughter
358	2	122	357	nd		granddaughter
359	2	122	357	d	24.8333	granddaughter
360	2	122	359	nd		great grandaughter
361	2	122	359	nd		great grandaughter
362	2	122	356	e		daughter
363	2	123		nd		parent
364	2	124		d	17.6667	parent
365	2	124	364	e		daughter
366	2	124	364	nd		daughter
367	2	125		d	14.5	parent
368	2	125	367	d	22.1667	daughter
369	2	125	368	nd		granddaughter
370	2	125	368	nd		granddaughter
371	2	125	367	e		daughter
372	2	126		d	14.5	parent
373	2	126	372	nd		daughter
374	2	126	372	d	22.3333	daughter
375	2	126	374	nd		granddaughter
376	2	126	374	nd		granddaughter
377	2	127		e		parent
378	2	128		nd		parent
379	2	129		d	17.1667	parent
380	2	129	379	d	23.1667	daughter
381	2	129	380	nd		granddaughter
382	2	129	380	nd		granddaughter
383	2	129	379	d	22.3333	daughter
384	2	129	383	nd		granddaughter
385	2	129	383	nd		granddaughter
386	2	130		d	18.1667	parent
387	2	130	386	nd		daughter
388	2	130	386	d	24.5	daughter
389	2	130	388	nd		granddaughter
390	2	130	388	nd		granddaughter
391	2	131		d	15.6667	parent
392	2	131	391	e		daughter
393	2	131	391	e		daughter
394	2	132		d	12.1667	parent
395	2	132	394	d	18	daughter
396	2	132	395	d	22.6667	granddaughter
397	2	132	396	nd		great grandaughter
398	2	132	396	nd		great grandaughter
399	2	132	395	d	23	granddaughter
400	2	132	399	nd		great grandaughter
401	2	132	399	nd		great grandaughter
402	2	132	394	d	22.8333	daughter
403	2	132	402	nd		granddaughter
404	2	132	402	nd		granddaughter
405	2	133		d	11.5	parent
406	2	133	405	d	17	daughter
407	2	133	406	e		granddaughter
408	2	133	406	e		granddaughter
409	2	133	405	d	16.1667	daughter
410	2	133	409	d	20.8333	granddaughter
411	2	133	410	nd		great grandaughter
412	2	133	410	nd		great grandaughter
413	2	133	409	d	20.6667	granddaughter
414	2	133	413	nd		great grandaughter
415	2	133	413	nd		great grandaughter
416	2	134		d	13.6667	parent
417	2	134	416	d	21.8333	daughter
418	2	134	417	nd		granddaughter
419	2	134	417	nd		granddaughter
420	2	134	416	d	21.1667	daughter
421	2	134	420	nd		granddaughter
422	2	134	420	nd		granddaughter
423	2	135		d	22.5	parent
424	2	135	423	nd		daughter
425	2	135	423	nd		daughter
426	2	136		nd		parent
427	2	137		d	18.6667	parent
428	2	137	427	nd		daughter
429	2	137	427	nd		daughter
430	2	138		d	20.1667	parent
431	2	138	430	nd		daughter
432	2	138	430	nd		daughter
433	2	140		d	16.6667	parent
434	2	140	433	d	21.5	daughter
435	2	140	434	nd		granddaughter
436	2	140	434	nd		granddaughter
437	2	140	433	d	21.3333	daughter
438	2	140	437	nd		granddaughter
439	2	140	437	nd		granddaughter
440	2	141		d	19.1667	parent
441	2	141	440	nd		daughter
442	2	141	440	nd		daughter
443	2	142		d	19.6667	parent
444	2	142	443	nd		daughter
445	2	142	443	nd		daughter
446	2	143		d	21.6667	parent
447	2	143	446	nd		daughter
448	2	143	446	nd		daughter
449	2	144		d	21.5	parent
450	2	144	449	nd		daughter
451	2	144	449	nd		daughter
452	2	145		d	23	parent
453	2	145	452	nd		daughter
454	2	145	452	nd		daughter
455	3	146		d	16.75	parent
456	3	146	455	nd		daughter
457	3	146	455	nd		daughter
458	3	147		nd		parent
459	3	148		d	14	parent
460	3	148	459	nd		daughter
461	3	148	459	d	22.75	daughter
462	3	148	461	nd		granddaughter
463	3	148	461	e		granddaughter
464	3	149		nd		parent
465	3	150		d	19	parent
466	3	150	465	nd		daughter
467	3	150	465	nd		daughter
468	3	151		d	22.25	parent
469	3	151	468	nd		daughter
470	3	151	468	e		daughter
471	3	152		nd		parent
472	3	153		d	28.25	parent
473	3	153	472	nd		daughter
474	3	153	472	nd		daughter
475	3	154		nd		parent
476	3	155		nd		parent
477	3	156		d	23.5	parent
478	3	156	477	nd		daughter
479	3	156	477	nd		daughter
480	3	157		d	21.25	parent
481	3	157	480	nd		daughter
482	3	157	480	nd		daughter
483	3	158		d	25	parent
484	3	158	483	nd		daughter
485	3	158	483	nd		daughter
486	3	159		d	13.75	parent
487	3	159	486	nd		daughter
488	3	159	486	d	24.75	daughter
489	3	159	488	nd		granddaughter
490	3	159	488	nd		granddaughter
491	3	160		e		parent
492	3	161		d	23	parent
493	3	161	492	nd		daughter
494	3	161	492	nd		daughter
495	3	162		d	22.5	parent
496	3	162	495	nd		daughter
497	3	162	495	nd		daughter
498	3	163		nd		parent
499	3	164		d	18.75	parent
500	3	164	499	nd		daughter
501	3	164	499	nd		daughter
502	3	165		d	23.5	parent
503	3	165	502	nd		daughter
504	3	165	502	nd		daughter
505	3	166		d	20	parent
506	3	166	505	e		daughter
507	3	166	505	nd		daughter
508	3	167		d	22.25	parent
509	3	167	508	nd		daughter
510	3	167	508	nd		daughter
511	3	168		nd		parent
512	3	169		d	21.25	parent
513	3	169	512	nd		daughter
514	3	169	512	nd		daughter
515	3	170		d	29.5	parent
516	3	170	515	nd		daughter
517	3	170	515	nd		daughter
518	3	171		nd		parent
519	3	172		nd		parent
520	3	173		nd		parent
521	3	174		nd		parent
522	3	175		nd		parent
523	3	176		d	14.75	parent
524	3	176	523	nd		daughter
525	3	176	523	e		daughter
526	3	177		nd		parent
527	3	178		d	28.25	parent
528	3	178	528	nd		daughter
529	3	178	528	nd		daughter
530	3	179		nd		parent
531	3	180		d	17.5	parent
532	3	180	531	e		daughter
533	3	180	531	e		daughter
534	3	181		nd		parent
535	3	182		nd		parent
536	3	183		d	24.5	parent
537	3	183	536	nd		daughter
538	3	183	536	nd		daughter
539	3	184		d	14.5	parent
540	3	184	539	d	26.5	daughter
541	3	184	540	nd		granddaughter
542	3	184	540	nd		granddaughter
543	3	184	539	d	26.25	daughter
544	3	184	543	nd		granddaughter
545	3	184	543	nd		granddaughter
546	3	185		d	26	parent
547	3	185	546	nd		daughter
548	3	185	546	nd		daughter
549	3	186		nd		parent
550	3	187		d	22.25	parent
551	3	187	550	nd		daughter
552	3	187	550	nd		daughter
553	3	188		nd		parent
554	3	189		d	14.75	parent
555	3	189	554	e		daughter
556	3	189	554	nd		daughter
557	3	190		d	12	parent
558	3	190	557	nd		daughter
559	3	190	557	d	23.5	daughter
560	3	190	559	nd		granddaughter
561	3	190	559	nd		granddaughter
562	3	191		nd		parent
563	3	192		d	20.5	parent
564	3	192	563	e		daughter
565	3	192	563	e		daughter
566	3	193		d	23	parent
567	3	193	566	nd		daughter
568	3	193	566	nd		daughter
569	3	194		d	15.75	parent
570	3	194	569	nd		daughter
571	3	194	569	nd		daughter
572	4	195		nd		parent
573	4	196		nd		parent
574	4	197		d	15	parent
575	4	197	574	nd		daughter
576	4	197	574	nd		daughter
577	4	198		nd		parent
578	4	199		nd		parent
579	4	200		e		parent
580	4	201		nd		parent
581	4	202		nd		parent
582	4	203		nd		parent
583	4	204		d	17.5	parent
584	4	204	583	nd		daughter
585	4	204	583	nd		daughter
586	4	205		nd		parent
587	4	206		nd		parent
588	4	207		nd		parent
589	4	208		nd		parent
590	4	209		d	14.25	parent
591	4	209	590	nd		daughter
592	4	209	590	nd		daughter
593	4	210		nd		parent
594	4	211		nd		parent
595	4	212		d	11.75	parent
596	4	212	595	nd		daughter
597	4	212	595	e		daughter
598	4	213		nd		parent
599	4	214		nd		parent
600	4	215		nd		parent
601	4	216		nd		parent
602	4	217		nd		parent
603	4	218		d	10.75	parent
604	4	218	603	nd		daughter
605	4	218	603	nd		daughter
606	4	219		e		parent
607	4	220		nd		parent
608	4	221		l		parent
609	4	222		nd		parent
610	4	223		nd		parent
611	4	224		nd		parent
612	4	225		d	12.5	parent
613	4	225	612	nd		daughter
614	4	225	612	nd		daughter
615	4	226		l		parent
616	4	227		nd		parent
617	4	228		d	11.25	parent
618	4	228	617	nd		daughter
619	4	228	617	nd		daughter
620	4	229		nd		parent
621	4	230		nd		parent
622	4	231		d	16.25	parent
623	4	231	622	nd		daughter
624	4	231	622	nd		daughter
625	4	232		nd		parent
626	4	233		nd		parent
627	4	234		nd		parent
628	4	235		l		parent
629	4	236		d	12.5	parent
630	4	236	629	e		daughter
631	4	236	629	e		daughter
632	4	237		l		parent
633	4	238		d	19.5	parent
634	4	238	633	e		daughter
635	4	238	633	e		daughter
636	4	239		nd		parent
637	4	240		d	13.75	parent
638	4	240	637	nd		daughter
639	4	240	637	nd		daughter
640	4	241		nd		parent
641	4	242		nd		parent
642	4	243		nd		parent
643	4	244		nd		parent
644	4	245		nd		parent
645	4	246		nd		parent
646	4	247		d	12	parent
647	4	247	646	nd		daughter
648	4	247	646	nd		daughter
649	4	248		d	7.25	parent
650	4	248	650	e		daughter
651	4	248	650	nd		daughter
652	4	249		nd		parent
653	4	250		nd		parent
654	4	251		nd		parent
655	4	252		nd		parent
656	4	253		nd		parent
657	4	254		nd		parent
658	4	255		nd		parent
659	4	256		nd		parent
660	4	257		nd		parent
661	4	258		nd		parent
662	4	259		d	10.5	parent
663	4	259	662	nd		daughter
664	4	259	662	nd		daughter
665	4	260		nd		parent
666	4	261		d	13.5	parent
667	4	261	666	nd		daughter
668	4	261	666	nd		daughter
669	4	262		nd		parent
670	4	263		nd		parent
671	4	264		d	19	parent
672	4	264	671	nd		daughter
673	4	264	671	nd		daughter
674	4	265		nd		parent
675	4	266		nd		parent
676	4	267		nd		parent
677	4	268		d	19	parent
678	4	268	677	nd		daughter
679	4	268	677	nd		daughter
680	4	269		d	13.5	parent
681	4	269	680	nd		daughter
682	4	269	680	nd		daughter
683	4	270		nd		parent
684	4	271		nd		parent
685	4	272		nd		parent
686	4	273		nd		parent
687	4	274		nd		parent
688	4	275		l		parent
689	4	276		d	10	parent
690	4	276	689	nd		daughter
691	4	276	689	nd		daughter
692	4	277		nd		parent
693	4	278		d	16.5	parent
694	4	278	693	nd		daughter
695	4	278	693	nd		daughter
696	4	279		nd		parent
697	4	280		nd		parent
698	4	281		nd		parent
699	4	282		nd		parent
700	4	283		nd		parent
701	4	284		d	12.25	parent
702	4	284	701	nd		daughter
703	4	284	701	nd		daughter
704	4	285		d	13.5	parent
705	4	285	704	nd		daughter
706	4	285	704	nd		daughter
707	4	286		nd		parent
708	4	287		d	15.25	parent
709	4	287	708	nd		daughter
710	4	287	708	e		daughter
711	4	288		nd		parent
712	4	289		d	12.75	parent
713	4	289	712	nd		daughter
714	4	289	712	nd		daughter
715	4	290		nd		parent
716	4	291		nd		parent
717	4	292		d	13.75	parent
718	4	292	717	nd		daughter
719	4	292	717	nd		daughter
720	4	293		nd		parent
721	4	294		nd		parent
722	4	295		nd		parent
723	4	296		e		parent
724	4	297		nd		parent
725	4	298		nd		parent
726	4	299		nd		parent
727	4	300		nd		parent
728	4	301		nd		parent
729	4	302		nd		parent
730	4	303		d	15.75	parent
731	4	303	730	e		daughter
732	4	303	730	e		daughter
733	4	304		d	13.25	parent
734	4	304	733	nd		daughter
735	4	304	733	nd		daughter
736	4	305		nd		parent
737	4	306		nd		parent
738	4	307		nd		parent
739	4	308		nd		parent
740	4	309		nd		parent
741	4	310		nd		parent
742	4	311		l		parent
743	4	312		nd		parent
744	4	313		d	9	parent
745	4	313	744	e		daughter
746	4	313	744	nd		daughter
747	4	314		d	15.5	parent
748	4	314	747	nd		daughter
749	4	314	747	e		daughter
750	4	315		nd		parent
751	4	316		nd		parent
752	4	317		d	7.75	parent
753	4	317	752	nd		daughter
754	4	317	752	e		daughter
755	4	318		nd		parent
756	4	319		d	10.5	parent
757	4	319	756	e		daughter
758	4	319	756	nd		daughter
759	4	320		l		parent
760	4	321		d	10.5	parent
761	4	321	760	nd		daughter
762	4	321	760	nd		daughter
763	4	322		d	16	parent
764	4	322	763	nd		daughter
765	4	322	763	e		daughter
766	4	323		e		parent
767	4	324		nd		parent
768	4	325		d	18	parent
769	4	325	768	nd		daughter
770	4	325	768	nd		daughter
771	4	326		nd		parent
772	4	327		nd		parent
773	4	328		nd		parent
774	4	329		nd		parent
775	4	330		d	17	parent
776	4	330	775	nd		daughter
777	4	330	775	nd		daughter
778	4	331		d	14.25	parent
779	4	331	778	nd		daughter
780	4	331	778	nd		daughter
781	4	332		nd		parent
782	4	333		nd		parent
783	4	334		d	12.75	parent
784	4	334	783	nd		daughter
785	4	334	783	nd		daughter
786	4	335		nd		parent
787	4	336		e		parent
788	4	337		l		parent
789	4	338		nd		parent
790	4	339		d	19	parent
791	4	339	790	nd		daughter
792	4	339	790	e		daughter
793	4	340		e		parent
794	4	341		d	13.25	parent
795	4	341	794	e		daughter
796	4	341	794	nd		daughter
797	4	342		nd		parent
798	4	343		d	16.5	parent
799	4	343	798	nd		daughter
800	4	343	798	nd		daughter
801	4	344		d	7	parent
802	4	344	801	nd		daughter
803	4	344	801	nd		daughter
804	4	345		d	11.25	parent
805	4	345	804	e		daughter
806	4	345	804	nd		daughter
807	4	346		nd		parent
808	4	347		nd		parent
809	4	348		d	10	parent
810	4	348	809	e		daughter
811	4	348	809	e		daughter
812	4	349		nd		parent
813	4	350		nd		parent
814	4	351		nd		parent
815	4	352		nd		parent
816	4	353		d	15.25	parent
817	4	353	816	nd		daughter
818	4	353	816	e		daughter
819	4	354		nd		parent
820	4	355		l		parent

## Sheet: Fig 4E act8 upreg vs division
Values of act8 upregulation time and division time shown in Fig 4E, for all replicates
track_ID	time to act8 upregulation (h)	time to division (h)	Replicate
1	6.13921	8.66667	1
11	11.2448	19.5	1
15	10.686	25.3333	1
19	15.0891	25	1
22	15.2528	23.1667	1
25	12.29	24.6667	1
32	12.5951	19	1
35	13.7243	20.8333	1
42	10.6167	23	1
45	10.7356	20.5	1
52	13.8749	22.9167	1
55	11.2856	31.5	1
58	11.6193	22.3333	1
66	8.32961	18.1667	1
73	13.5564	18.6667	1
77	9.78302	25.3333	1
84	11.0636	20.3333	1
87	12.0189	29.6667	1
90	11.9147	27.3333	1
93	14.2409	24.5	1
96	16.4409	33.6667	1
100	10.4171	16	1
103	9.95807	18.6667	1
112	10.6012	14.6667	1
120	11.9372	18.1667	1
123	11.69	30.5	1
128	15.422	23	1
134	21.2934	34.1667	1
137	8.90977	18.1667	1
142	13.4458	21.8333	1
147	12.4168	26.1667	1
152	14.9054	26.5	1
155	15.2501	23	1
158	13.2287	21.3333	1
163	11.2782	17.3333	2
168	10.9598	17.5	2
175	15.5822	20	2
178	13.9111	18.8333	2
182	15.6267	19.1667	2
187	13.9011	17.5	2
194	12.4154	17.3333	2
201	14.4106	16.8333	2
208	10.0641	13.3333	2
216	12.7474	16.1667	2
221	9.05907	18	2
225	18.3585	24.5	2
231	12.5391	15.3333	2
239	13.2591	15.3333	2
246	13.751	17.8333	2
251	14.268	19.6667	2
257	11.2975	14.5	2
264	15.7157	18.5	2
267	16.7805	19.6667	2
271	10.9252	17.3333	2
278	12.6013	15.6667	2
285	13.6452	17.3333	2
289	17.7295	23.5	2
294	13.7773	19.8333	2
298	21.393	24.3333	2
301	13.287	19.1667	2
305	16.5802	21.3333	2
308	14.3765	17.6667	2
311	13.4409	17.1667	2
318	7.09739	11.5	2
330	10.2668	14.1667	2
339	16.5809	21.1667	2
342	13.1058	18	2
349	9.73718	14.1667	2
356	12.7813	14.6667	2
364	14.7745	17.6667	2
367	11.4561	14.5	2
372	12.14	14.5	2
379	13.9603	17.1667	2
386	13.042	18.1667	2
391	12.9231	15.6667	2
394	3.66693	12.1667	2
405	8.38201	11.5	2
416	12.6322	13.6667	2
423	13.742	22.5	2
427	15.109	18.6667	2
430	14.2368	20.1667	2
433	14.424	16.6667	2
440	18.2451	19.1667	2
443	16.2043	19.6667	2
446	16.0495	21.6667	2
449	14.7688	21.5	2
452	19.4388	23	2
455	10.3654	16.75	3
459	9.3687	14	3
465	11.9265	19	3
468	11.8165	22.25	3
472	14.058	28.25	3
477	10.3605	23.5	3
480	11.2932	21.25	3
483	15.889	25	3
486	8.22358	13.75	3
492	8.94101	23	3
495	16.1058	22.5	3
499	9.02789	18.75	3
502	14.1875	23.5	3
505	15.0443	20	3
508	13.0361	22.25	3
512	10.0502	21.25	3
515	12.2444	29.5	3
523	8.39374	14.75	3
527	11.5903	28.25	3
531	13.095	17.5	3
536	18.4215	24.5	3
539	8.90899	14.5	3
546	12.966	26	3
550	13.186	22.25	3
554	8.84425	14.75	3
557	8.24947	12	3
563	11.6326	20.5	3
566	11.3819	23	3
569	10.6645	15.75	3
574	9.08891	15	4
583	7.88766	17.5	4
590	7.73137	14.25	4
595	7.07211	11.75	4
603	7.59131	10.75	4
612	9.92756	12.5	4
617	8.68252	11.25	4
622	7.46023	16.25	4
629	8.84757	12.5	4
633	8.88543	19.5	4
637	7.05407	13.75	4
646	7.64116	12	4
649	9.15127	7.25	4
662	11.3953	10.5	4
666	7.03199	13.5	4
671	10.8417	19	4
677	7.50036	19	4
680	8.64205	13.5	4
689	9.39258	10	4
693	11.0857	16.5	4
701	8.58356	12.25	4
704	8.87189	13.5	4
708	11.6449	15.25	4
712	8.3233	12.75	4
717	8.14463	13.75	4
730	8.97502	15.75	4
733	8.4805	13.25	4
744	6.31671	9	4
747	7.6807	15.5	4
752	8.57703	7.75	4
756	5.97635	10.5	4
760	7.13151	10.5	4
763	8.25094	16	4
768	6.94783	18	4
775	11.3957	17	4
778	8.67962	14.25	4
783	6.65691	12.75	4
790	11.8275	19	4
794	11.8751	13.25	4
798	10.1073	16.5	4
801	7.93241	7	4
804	7.93241	11.25	4
809	7.33762	10	4
816	8.64681	15.25	4

## Sheet: Fig 4F act8 upreg rate vs div
Values of act8 upregulation rate for dividing and non dividing cells as shown in Fig 4F, for all replicates
rate of act8 upregulation (AU h-1)	divide or no division	Replicate
118080	divide	1
59107	divide	1
44664	divide	1
56439	divide	1
56482	divide	1
73911	divide	1
71054	divide	1
60981	divide	1
49148	divide	1
60476	divide	1
76739	divide	1
47988	divide	1
54247	divide	1
34610	divide	1
91574	divide	1
80528	divide	1
56400	divide	1
59715	divide	1
46908	divide	1
47429	divide	1
55802	divide	1
46712	divide	1
78152	divide	1
116290	divide	1
75738	divide	1
43169	divide	1
61916	divide	1
40998	divide	1
72898	divide	1
74639	divide	1
45642	divide	1
52581	divide	1
41398	divide	1
59915	divide	1
63445	no division	1
102380	no division	1
39219	no division	1
35202	no division	1
27999	no division	1
57451	no division	1
21748	no division	1
41574	no division	1
33966	no division	1
24555	no division	1
32111	no division	1
44565	no division	1
26992	no division	1
28835	no division	1
58916	no division	1
83040	no division	1
63579	no division	1
41767	no division	1
81671	no division	1
24653	no division	1
19881	no division	1
28380	no division	1
40512	no division	1
38819	no division	1
43041	no division	1
58021	no division	1
18646	no division	1
5640	divide	2
6224.5	divide	2
9554.8	divide	2
11212	divide	2
9675.5	divide	2
9554	divide	2
10560	divide	2
9336.2	divide	2
2222.8	divide	2
11502	divide	2
2072.7	divide	2
3828.3	divide	2
4941.6	divide	2
9908.7	divide	2
18424	divide	2
7900.6	divide	2
8144.4	divide	2
13331	divide	2
16441	divide	2
9326	divide	2
18979	divide	2
10718	divide	2
6321.6	divide	2
9021.4	divide	2
12548	divide	2
3519.6	divide	2
7586	divide	2
13740	divide	2
11408	divide	2
6522.6	divide	2
9319.8	divide	2
8304.8	divide	2
5268.6	divide	2
6881	divide	2
14483	divide	2
15528	divide	2
5547.3	divide	2
7380.8	divide	2
9089.1	divide	2
8252.8	divide	2
13475	divide	2
9161.4	divide	2
10896	divide	2
16382	divide	2
7506.1	divide	2
10145	divide	2
4746.2	divide	2
18295	divide	2
13558	divide	2
8907.8	divide	2
14542	divide	2
5745.2	divide	2
18586	divide	2
2450.9	no division	2
9091.8	no division	2
7640.7	no division	2
2350.6	no division	2
1483.8	no division	2
9713	no division	2
6761.8	no division	2
4765	no division	2
9630	no division	2
8632.8	no division	2
12276	no division	2
5444.9	no division	2
32106	divide	3
41390	divide	3
46703	divide	3
25080	divide	3
33044	divide	3
37125	divide	3
60289	divide	3
27795	divide	3
45178	divide	3
22114	divide	3
44521	divide	3
45355	divide	3
25096	divide	3
38076	divide	3
36688	divide	3
25092	divide	3
24157	divide	3
38935	divide	3
42577	divide	3
50870	divide	3
43712	divide	3
40301	divide	3
27911	divide	3
44053	divide	3
44051	divide	3
24706	divide	3
33830	divide	3
29178	divide	3
54176	divide	3
12499	no division	3
34457	no division	3
35915	no division	3
24237	no division	3
22308	no division	3
34478	no division	3
18649	no division	3
18142	no division	3
22689	no division	3
24710	no division	3
36149	no division	3
31785	no division	3
12392	no division	3
18643	no division	3
31911	no division	3
24639	no division	3
36579	no division	3
18679	no division	3
38395	divide	4
18836	divide	4
34334	divide	4
37328	divide	4
28409	divide	4
58341	divide	4
59825	divide	4
34144	divide	4
49428	divide	4
41005	divide	4
29470	divide	4
44997	divide	4
46996	divide	4
50505	divide	4
38682	divide	4
33281	divide	4
23832	divide	4
61437	divide	4
22381	divide	4
52107	divide	4
28342	divide	4
62163	divide	4
64728	divide	4
66829	divide	4
35390	divide	4
33342	divide	4
49235	divide	4
17426	divide	4
48824	divide	4
38274	divide	4
13496	divide	4
35438	divide	4
23788	divide	4
32250	divide	4
44769	divide	4
45797	divide	4
38021	divide	4
40180	divide	4
44801	divide	4
40504	divide	4
31069	divide	4
28669	divide	4
31662	divide	4
33013	divide	4
49864	no division	4
4293.4	no division	4
24541	no division	4
51497	no division	4
33541	no division	4
33544	no division	4
13642	no division	4
25824	no division	4
11952	no division	4
39374	no division	4
52066	no division	4
10960	no division	4
30691	no division	4
24935	no division	4
35030	no division	4
30889	no division	4
11110	no division	4
11058	no division	4
30838	no division	4
35768	no division	4
48039	no division	4
35827	no division	4
31984	no division	4
45801	no division	4
38063	no division	4
18332	no division	4
10872	no division	4
15705	no division	4
26423	no division	4
18946	no division	4
8485.8	no division	4
43144	no division	4
27705	no division	4
14465	no division	4
46494	no division	4
23138	no division	4
35725	no division	4
24050	no division	4
19934	no division	4
21585	no division	4
31718	no division	4
32597	no division	4
31776	no division	4
54087	no division	4
25554	no division	4
33221	no division	4
20339	no division	4
3633.1	no division	4
27198	no division	4
25795	no division	4
17739	no division	4
16603	no division	4
31023	no division	4
37042	no division	4
38663	no division	4
30140	no division	4
15010	no division	4
27436	no division	4
13047	no division	4
29215	no division	4
38896	no division	4
19197	no division	4
8431.9	no division	4
39441	no division	4
56804	no division	4
33274	no division	4
22243	no division	4
67672	no division	4
45742	no division	4
15705	no division	4
34635	no division	4
44477	no division	4
31949	no division	4
6085.3	no division	4
28026	no division	4
36238	no division	4
50435	no division	4
17018	no division	4
19215	no division	4
33451	no division	4
21343	no division	4
23433	no division	4
26865	no division	4
34682	no division	4
25832	no division	4
7223.2	no division	4
28024	no division	4
38640	no division	4
37720	no division	4
7455.9	no division	4
10609	no division	4
40923	no division	4
18551	no division	4
20902	no division	4
30214	no division	4

## Sheet: Fig4 supp 1B
Figure 4 - figure supplement 1B
Cell cycle duration (h) in undifferentiated and dedifferentiating cells
Undifferentiated	Dedifferentiation
3.83333	18.3333
3.83333	13.8333
4.16667	12.3333
3.5	12
2.5	12
6.66667	12
6.16667	11.8333
9.66667	11.8333
5.5	11.75
7	11.5
10.6667	11
4.33333	10.8333
6	10.6667
5	10.6667
8	10.5
5.33333	10
5.83333	8.83333
5.83333	8.83333
7.33333	8.75
6.16667	8.66667
5.66667	8.16667
6.16667	8.16667
6.66667	7.83333
6.5	7.83333
8.16667	7.83333
6	7.66667
6	7.66667
5.16667	7.66667
6.33333	7.5
5.5	7.5
5.83333	7.5
6.33333	7.5
8.33333	7.33333
7.83333	7.33333
8.83333	7.33333
5.33333	7.33333
6.16667	7.33333
7	7
4.83333	6.83333
5.83333	6.83333
6	6.83333
7	6.66667
6	6.5
7	6.5
9.5	6.5
5	6.33333
6.83333	6
5.66667	6
8.16667	6
5.83333	5.83333
6.66667	5.66667
5.83333	5.66667
8.16667	5.66667
5	5.66667
10.1667	5.5
8.33333	5.5
5.33333	5.33333
7.5	5.16667
6.66667	5
5.83333	4.83333
	4.83333
	4.83333
	4.66667
	4.66667
