# Supplementary material for: Cell and molecular transitions during efficient dedifferentiation
Source: eLife journal article supplement (doi:10.7554/elife.55435), 2020-04-07
Supplement: supp [file elife-55435-supp-v1.zip › elife_poa_e55435_Figure_5_source_data_1.xlsx]

## Sheet: Fig 5A motility sampling
Fig 5A motility sampling. Cell speed values (µm/min) sampled at time intervals during dedifferentiation
1h	2h	3h	4h	5h	6h	7h	9h	11h	13h	15h	17h	19h	21h	23h	25h
2.4345	0.640708	0.727139	5.03867	3.03377	1.51455	2.42413	1.62219	0.401457	0.543905	0.357809	1.75844	1.57977	3.06618	7.80274	3.12358
2.49227	1.40632	4.55512	3.33872	1.9399	2.78081	0.575403	0.323385	0.33678	0.304441	0.499111	1.23686	1.14544	2.74299	4.21163	1.04238
2.48674	4.3992	2.31426	2.57192	1.94706	2.71992	0.87221	0.578417	0.885156	2.28405	0.433795	1.83109	1.67782	2.06248	1.10953	3.83663
0.643094	1.77681	0.568397	1.23388	3.29994	2.30104	1.09396	1.40602	0.352048	0.582092	0.643094	1.64402	3.16502	3.4829	1.16972	0.81076
2.38216	0.667798	0.63221	8.26832	1.08474	2.60049	0.675645	0.449276	0.323385	0.662037	1.2398	2.18269	0.804786	4.53514	0.774533	9.81332
0.494797	0.729013	1.92428	0.913023	1.06371	1.91846	0.570783	0.570996	0.966817	0.409091	0.584178	1.36358	1.00666	2.41778	2.77862	8.03674
0.390147	0.511867	1.5459	2.53773	1.55352	1.19168	1.04519	1.1	0.624363	2.30344	0.291046	1.18658	1.33213	3.1383	2.54899	3.4146
5.93293	0.8024	1.6681	0.796852	4.37765	2.05539	0.761138	0.974237	1.22028	0.823429	0.194031	3.17074	2.47848	0.816735	5.91918	3.81573
0.479529	1.42855	0.605207	3.60648	1.93186	1.92263	0.765026	0.597573	0.285498	0.5576	1.04489	0.74557	3.1976	1.96951	1.78979	2.59399
0.468219	0.622917	3.17911	5.01068	2.93389	0.715617	1.56418	0.207426	0.968073	0.727139	0.726927	2.50385	1.8495	1.2581	1.76397	4.46668
0.673046	0.793689	8.42624	0.272103	0.947235	2.44124	0.499111	1.18751	0.487163	0.409091	0.595487	2.37828	5.31101	1.70253	3.52615	3.45162
2.96453	0.705898	3.17562	5.48762	0.920657	1.05022	2.30508	0.454824	0.910287	2.08813	1.18773	0.791604	0.603334	3.12039	3.32364	1.2372
0.738236	0.804999	1.50563	5.54008	1.36028	0.818181	0.33678	0.974325	0.652814	0.323385	0.818394	1.75961	2.14605	2.56148	2.28005	5.41841
2.34897	1.71329	0.974113	0.794116	4.97685	0.487163	0.616516	0.485077	1.29395	0.905783	0.899115	3.7272	1.93618	1.18491	5.35888	5.57554
0.753204	3.28422	4.00981	0.799238	2.23318	1.83095	0.506106	0.681193	1.45817	0.572869	0.209299	0.770913	2.10884	3.07221	4.80523	1.07011
0.532896	0.574584	2.04772	4.49854	0.944072	1.42623	1.35626	1.87977	0.370991	1.43456	0.926205	2.65899	2.08359	4.13678	3.37884	5.04991
3.77535	0.492924	0.702222	1.46831	0.675645	0.369118	1.33637	0.734561	1.40487	0.517415	0.702222	2.19615	1.07147	3.06509	3.94663	4.19409
0.544205	1.91308	0.669671	0.713532	1.2846	0.382513	1.66759	1.20508	0.563149	1.87072	0.810247	2.22454	2.9027	3.91174	3.31367	1.53322
0.53081	0.44719	0.479529	1.21639	0.234003	5.38565	1.11816	1.11916	0.36357	1.99954	1.46396	1.1736	3.74572	2.95678	3.36313	2.66467
0.688827	0.481614	0.840499	0.737936	1.69519	1.63522	1.25586	0.709343	0.896253	1.64796	1.28683	2.42128	0.713532	2.54601	2.17162	7.3789
0.454824	5.24648	1.59766	0.312288	0.681193	0.678807	1.87562	1.19579	1.26182	1.56669	0.676284	2.0483	4.56963	1.23943	1.02006	3.53598
0.740322	0.686954	5.90065	1.79616	0.751631	0.941987	1.23107	0.511867	0.291046	0.907563	1.07659	3.72336	2.72598	2.19804	3.09769	3.98428
0.239764	0.647075	3.02759	1.31298	0.732688	4.0821	0.882858	0.686954	1.16345	1.17464	1.06959	2.18194	5.03409	3.92453	1.07219	3.6707
5.33252	5.64599	1.91815	1.68322	4.62879	0.551539	0.511867	0.732175	1.22445	3.91944	3.78028	2.37293	2.50797	4.24172	1.77518	5.02374
1.58844	6.50557	1.38501	0.285498	0.570783	1.38239	1.20875	0.433795	0.53081	1.1195	1.88851	2.8572	5.99672	3.19516	1.10576	3.5456
0.272103	0.799238	0.481614	7.67088	1.49599	0.344414	0.369118	0.595487	0.57863	0.273976	1.19723	1.35236	3.71468	6.19721	2.31966	3.9262
0.494797	0.856707	0.570783	0.506319	0.500345	0.441429	1.2102	1.05795	0.622704	0.331231	2.90344	2.33666	3.90344	3.05085	3.74373	4.60279
0.428247	0.700137	0.363357	0.854501	1.22172	0.650941	1.9777	0.49241	2.58279	0.589939	2.64979	3.54457	3.80467	2.08011	4.41145	4.04946
0.719374	0.851159	0.540743	0.759478	4.58637	4.08896	0.511867	1.35663	0.56713	0.416725	3.10447	0.908622	1.95044	3.08485	2.76191	8.24716
0.947962	0.53081	1.23828	2.2619	1.00299	0.53145	0.896466	0.715617	0.33678	0.5573	1.21093	2.90006	3.69111	2.65802	2.23751	3.28991
0.681193	0.435881	2.0542	3.93017	1.67165	1.70882	0.097015	0.976974	1.7938	3.40602	1.59738	0.839423	3.08916	0.909861	3.16397	3.54674
0.55184	0.758752	0.53081	0.239764	1.95925	1.06579	1.27774	0.751118	0.689253	2.54446	0.597573	1.93266	2.24537	2.31436	1.50355	3.10593
0.53081	0.454824	2.92874	6.4878	0.966691	1.03921	0.409091	1.15257	0.338865	1.3509	0.500558	1.12262	1.90379	1.32323	4.74957	3.91775
0.376752	5.23681	0.681406	0.357809	3.08038	0.835891	0.363357	0.312075	0.995142	0.500558	2.51696	1.85459	1.9657	2.85301	3.29741	2.8854
4.89445	0.713444	0.506106	1.33134	1.18	3.25633	0.513953	0.733327	0.893867	0.363357	0.376752	2.17702	2.10633	0.660803	5.51123	2.73763
0.811399	4.57371	0.83921	3.80676	1.19255	1.69904	1.70991	0.519501	0.47398	0.422698	2.13593	3.60028	1.19723	3.50153	3.25865	5.30895
0.498472	2.44045	0.774533	1.11865	2.08166	1.64614	0.877522	0.401457	0.344626	0.889913	1.7809	1.60749	3.75104	1.90181	1.7032	5.46287
1.05137	3.47277	2.72879	2.44898	1.82987	0.887052	2.44909	1.21041	0.201665	0.441429	0.492711	1.85927	2.41367	2.49842	3.82375	5.48761
1.08265	2.9314	2.6802	0.673559	1.5036	0.258708	2.05837	0.525262	0.635672	1.82756	0.867289	1.29784	2.67661	4.69217	5.59098	3.31846
0.759053	0.855554	7.94873	2.7929	2.02894	1.04582	0.873422	0.656489	0.293132	0.660164	1.8138	2.16504	2.88724	2.66106	4.92023	2.75078
0.993908	0.239764	3.26559	3.16326	0.740322	0.834738	0.597573	1.39868	1.13832	0.542426	0.291046	2.28566	1.99499	2.93447	4.80981	6.87461
1.33717	0.740109	1.87869	2.40021	3.60512	0.47398	0.382513	0.234003	2.11823	1.07125	1.88838	2.42195	4.425	3.32825	8.00053	2.29569
1.92361	1.06341	1.58333	2.86492	0.669671	0.823942	0.818394	0.576544	0.656489	0.449063	3.32441	0.700989	1.17152	3.1838	3.42772	2.14051
0.629911	0.511867	3.32685	1.60314	0.713532	0.947447	0.28161	1.47006	0.50077	0.188482	2.12624	1.37497	1.33443	2.19087	3.77645	3.96362
0.470115	0.576544	0.603334	1.59399	1.29285	0.433795	0.77266	0.669884	0.390147	0.831789	0.441429	1.61724	0.740322	5.23625	5.38591	3.77279
0.974106	1.97681	1.79897	3.61014	1.18953	0.317836	1.46414	0.622277	0.772147	0.981446	1.26332	2.93851	1.45138	2.04233	4.43879	5.34668
0.688827	1.26716	0.675645	1.7675	1.75547	1.53423	0.804999	1.22957	1.27352	0.655255	0.774746	0.411176	1.47631	0.913023	4.77777	1.81895
0.668011	3.79693	3.00326	0.909861	1.26716	1.26378	1.33349	0.401457	0.627826	1.25068	1.48653	1.07566	3.0757	2.75522	3.1985	3.15726
0.62071	2.07768	2.58796	3.19809	0.639653	0.258708	0.570996	1.84315	0.624363	0.930164	2.1055	1.94689	2.25891	2.77128	6.06519	6.98429
0.55184	0.727139	2.12841	1.0716	3.99609	0.382513	2.16624	2.15285	0.272103	0.33678	0.597573	2.08866	1.88772	2.47089	3.1079	4.46158
0.452738	4.83404	4.62361	1.88893	1.68165	1.93966	1.21041	0.871761	2.01828	0.207426	2.07309	1.09574	1.11656	2.31446	2.46752	2.08051
0.681193	1.53943	1.79767	0.797152	1.57693	0.5576	1.02561	0.064677	0.810547	1.50568	1.23065	1.97221	1.02877	2.12744	1.5934	3.1805
1.42597	1.19349	1.62967	2.15753	1.95475	0.951706	0.388062	0.656489	3.72124	0.234216	0.874924	0.097015	0.441429	2.15079	1.60686	3.79728
1.2273	5.12849	3.87785	1.87092	0.993908	1.55562	0.357809	0.416725	0.641221	1.65414	1.29907	0.694588	2.58234	4.47903	7.04176	3.8983
0.525262	1.46274	1.13464	3.31638	0.519501	0.923256	0.701496	1.24269	0.33678	0.616729	2.20264	1.99379	2.42889	1.81432	5.03296	8.25769
0.968264	0.683279	1.37607	2.62855	0.220821	0.376965	0.802913	1.03533	0.36357	0.175087	0.616516	2.06406	1.05001	2.9564	2.67581	3.90943
0.481402	1.20121	2.33362	0.239764	0.804999	0.860239	2.58497	1.37105	0.643307	0.390147	0.589939	0.772448	1.37578	0.492924	1.51109	3.12885
1.40058	2.20402	1.70714	0.435668	1.99677	1.2236	0.616516	1.76512	0.656489	0.538657	0.57863	3.10292	0.500558	3.24352	4.91294	1.58442
2.48769	3.14959	1.90931	1.27191	2.77494	0.521374	1.48401	0.33678	1.08474	1.05218	1.75526	1.3093	1.06747	2.66699	5.07811	3.50818
0.5576	1.86482	4.98059		1.38333		0.804999		0.783757	0.624151	3.18675	2.64589	1.32607	2.0031	3.06267	1.42014
0.624363	6.13824	1.86618	3.49799	1.36733	0.401583	0.675432	5.43682	1.80543	1.64286	3.42135	5.85969	4.98701	7.18523	17.5692	0.797624
0.382513	0.70201	0.298893	1.69973	0.376752	2.99214	0.595187	1.89571	4.64823	2.96214	2.49964	3.8299	2.08832	3.14146	6.08118	3.35828
0.681193	0.68904	1.36792	0.742195	6.4634	0.546079	0.422486	0.457359	1.11101	4.81573	10.9383	3.27556	5.61771	18.6851	1.47115	3.62785
0.435881	1.10576	0.475853	0.89574	5.23496	0.770062	0.291046	1.61108	1.10944	5.21363	0.858366	10.4276	1.74291	17.1352	9.42472	7.12135
1.02509	0.272103	2.81155	3.05345	1.36071	1.53457	2.89404	2.99944	1.90858	2.96937	3.65987	0.982129	8.03283	3.57521	1.39079	8.80305
0.473768	1.0403	2.34035	2.28643	3.2573	1.32115	0.982172	2.8517	3.04925	1.01767	8.82719	2.26479	6.95305	4.5986	3.79609	1.30881
0.915409	3.09343	3.97608	0.907049	2.7568	3.6765	0.856493	0.32547	0.694588	0.597573	13.8652	1.07659	6.19044	2.11027	3.05429	3.72485
0.83755	1.84787	1.64379	1.06371	2.18601	0.369118	2.05983	1.18124	2.70469	0.519501	5.1617	6.22884	18.515	1.81476	1.90615	3.83144
2.24392	0.253159	0.29868	4.40319	0.669393	0.559686	0.422486	1.066	5.39719	1.89435	10.0531	6.13373	1.84116	2.24914	1.28097	2.19838
1.07321	1.74864	5.18419	1.12471	0.702435	2.24448	2.55231	1.71571	3.32363	0.759478	1.10589	5.51315	5.89353	4.92783	19.9348	2.04725
0.872325	0.369118	0.901714	3.14568	1.26182	1.75492	2.38832	0.593685	4.2336	3.44588	2.11681	17.5552	14.7356	1.51458	3.62541	3.27513
0.416725	3.029	0.33678	0.825815	2.25702	0.462671	0.570783	1.44442	0.502643	2.26142	2.21269	0.731826	2.67074	5.35834	2.12625	0.953126
0.66225	0.29868	3.15619	1.20658	2.03032	3.1063	0.55184	0.990882	0.747743	9.08023	9.02244	13.1805	7.44965	2.44851	4.38321	0.880354
0.915622	0.32547	1.43123	0.747956	0.890492	0.635672	0.68068	1.22742	1.84581	0.433795	4.04544	4.92421	2.90503	2.94081	12.0253	3.70558
0.603121	2.07849	0.481614	2.59898	0.630124	0.304441	1.46704	1.08537	4.6031	0.710069	4.28776	10.8057	1.69554	11.4887	6.19144	13.9159
0.739515	0.226369	0.201877	0.860239	0.804999	0.804786	0.804999	0.395908	1.31528	1.66692	3.41499	9.33277	0.637242	1.26873	3.17933	1.81981
0.608882	0.485077	3.71008	2.8129	2.83502	3.77806	1.27187	0.411176	0.688827	6.95169	1.67157	0.57627	11.6654	5.50715	0.986282	2.59313
0.414852	1.95049	0.53081	2.67729	1.54586	2.26832	0.972879	3.39934	1.35736	2.22164	2.00292	2.82032	6.51465	2.33659	13.3281	4.51173
1.11879	0.915197	0.363357	4.05326	1.42626	0.886233	0.485077	3.53768	2.64259	7.1228	2.30341	4.46965	3.44201	2.20668	5.26698	3.14811
1.10402	0.201665	1.54105	2.17081	0.559686	1.88836	0.894686	2.61127	1.69195	1.62878	2.39367	0.841972	0.920219	4.09296	5.34125	3.66341
0.570996	0.517415	3.18117	0.648855	1.44489	0.253159	0.928291	0.972293	2.75925	2.02582	11.2697	3.45959	1.81007	3.31237	4.33454	4.42881
1.00428	0.787951	0.43012	1.805	1.04872	0.517415	0.298893	1.13386	1.93457	3.04646	2.1824	2.80287	1.6509	3.24869	2.47212	4.56116
1.70945	2.29456	1.16698	1.84894	2.39648	0.331019	1.08172	0.907689	7.92159	14.8078	10.5485	2.8006	2.14752	4.90172	1.97724	3.59248
1.18742	0.239764	4.03178	2.18815	4.04882	0.711785	0.810247	0.559686	0.780294	2.61093	2.64893	2.25464	3.81139	2.79052	15.5323	3.56709
0.670097	0.466773	1.1198	1.37714	3.65756	1.56038	0.775309	5.30319	2.40933	1.03692	2.60014	3.81553	2.92778	1.24689	2.10832	2.91067
2.22449	0.129354	1.23527	6.60343	3.34136	1.36864	2.07954	0.104649	1.84937	3.09769	9.65136	11.2819	4.48605	5.82421	3.14039	2.97865
1.41349	3.05555	1.63061	2.77523	0.344414	0.913849	1.03481	1.74283	0.785542	1.08422	13.2637	3.84704	4.34408	1.85813	16.234	8.52098
0.582092	1.39178	3.20843	2.83351	6.24023	1.62711	1.06788	1.47983	0.808958	0.791091	3.05236	2.64896	3.11557	1.19666	2.78471	3.98329
1.05586	3.14354	1.35541	1.57634	1.50496	0.441642	1.83857	0.734986	4.68433	9.34392	3.1875	1.60856	3.76983	1.99084	16.4266	13.2661
1.11131	1.57133	0.475853	3.51502	1.02006	0.182721	0.136988	1.43311	0.696674	3.60767	14.1941	8.83688	8.50585	2.01338	2.05766	2.58839
0.559474	0.266554	2.96389	2.73413	0.932267	0.097015	1.73789	0.33678	0.506106	5.2795	3.77152	3.33224	1.93373	2.93204	1.68629	1.87617
0.677518	1.97198	5.04075	1.10944	0.5576	2.77976	0.433795	0.298893	1.41416	1.68985	0.95185	2.94775	2.51727	3.23538	0.859618	3.33335
1.4992	0.29868	1.10944	0.968777	1.01767	0.656489	0.457986	0.188482	5.05043	1.80359	8.348	3.99088	1.60296	3.49632	4.46789	0.928362
0.793689	0.732688	0.875224	0.410964	3.28663	0.414852	0.858366	0.538657	2.72832	1.7621	3.9854	2.5848	1.73268	1.40565	2.14079	3.00784
0.888832	0.622277	0.667498	3.77038	1.29129	2.34715	0.279737	1.55159	0.161692	8.58744	2.24758	14.9091	21.0764	1.92936	16.1582	2.4212
0.791816	0.980157	1.42398	0.409091	1.60436	0.909861	0.799238	1.65648	2.0566	1.69856	1.97407	1.78291	1.73051	8.98554	6.24344	1.70134
0.718992	1.65087	0.765152	0.866213	1.3001	0.188482	0.441642	0.813272	1.64305	1.31699	11.4006	10.6814	1.14124	3.11151	1.89192	1.43432
1.26788	5.03906	0.809101	0.584391	2.17471	0.500558	0.753717	0.409303	1.6082	1.45781	6.78829	1.71091	2.06896	4.05713	1.79374	2.2705
0.656489	0.552052	1.8749	1.29741	2.7348	1.50134	1.76439	0.207426	8.71409	2.64307	3.52671	9.78196	2.41584	1.59853	4.92243	2.53052
1.7958	1.31895	1.40542	0.207426	1.02978	1.1896	0.974325	0.207426	1.22791	1.07551	3.56745	10.7781	7.54097	6.27759	1.33322	3.81554
0.416937	0.998216	0.506319	5.91993	0.5576	2.44367	0.506319	0.764726	0.683279	1.12347	2.29362	1.66351	6.99258	2.25501	21.6003	13.6457
0.961143	0.546504	1.33014	1.79177	0.29868	2.94	0.441642	1.37795	1.11312	2.47468	1.51938	13.9386	2.83988	2.19462	2.47951	3.36737
0.751631	0.532896	0.850732	0.239764	0.675645	0.696887	0.538444	1.41971	0.759265	2.99421	13.7472	12.7643	2.58243	3.52344	6.1056	4.16199
1.08682	0.500044	3.49628	3.64072	1.57902	0.700349	2.11733	0.843525	0.877522	1.98957	3.14812	1.89696	2.76752	7.40675	11.3827	1.07889
0.902014	0.66225	1.9489	1.23742	3.10143	0.45691	0.350175	2.14698	0.686441	1.26537	2.147	5.05123	2.44021	5.8077	0.957875	4.73616
1.03315	1.12787	1.43072	1.35193	1.84703	0.814528	1.13895	5.145	0.409091	14.6942	7.70411	4.58735	2.11518	2.04386	2.82619	3.31255
0.917282	0.466133	1.67217	0.901501	1.76235	0.799238	0.907775	0.317836	0.344626	0.885156	3.18762	4.36189	2.46323	1.79936	1.93721	1.82816
1.25226	0.618602	2.60191	1.23147	0.544205	0.797365	0.930465	0.161692	0.331231	1.08444	3.99592	1.64372	3.4178	5.97998	6.22421	4.21634
1.09979	1.62059	0.7288	0.40333	0.907775	1.21545	1.0902	0.5576	3.50967	0.578417	0.668011	8.70925	1.2611	6.25363	11.6211	3.1704
0.877522	0.441429	0.875224	3.10596	1.65169	3.50718	0.694588	1.61899	10.9038	1.15892	7.79529	1.12179	0.916634	4.36194	3.38784	3.17919
0.806872	0.5576	0.847057	2.17333	0.721166	1.20709	0.705898	1.37595	9.92407	2.31004	2.00926	4.06746	11.5557	2.58979	2.67572	2.69058
1.14365	1.46955	2.71738	3.42824	3.46065	1.30188	0.724541	1.35185	0.546079	3.71185	20.796	15.3886	1.55299	2.28603	1.75349	2.5355
0.759265	0.694801	0.532684	0.91281	1.2236	0.979786	1.74059	8.15638	1.03345	3.35609	9.9491	5.26919	3.36959	8.18866	4.16911	6.38952
0.972452	0.63546	4.14078	0.710282	2.06528	1.12996	1.583	0.397781	0.409303	4.63689	2.34668	0.969976	4.04585	3.58066	0.829308	1.17684
0.823942	0.58704	3.52975	2.42887	4.18902	1.11312	1.59975	0.724841	6.82363	1.51434	2.76067	6.23009	3.83065	2.6832	1.946	3.7232
0.896678	0.702222	1.00666	7.241	2.28861	0.793477	0.584178	0.608882	1.62677	7.54795	1.73863	6.22009	1.4383	3.05354	3.42843	1.88444
1.15747	0.454824	0.511867	0.627525	2.8961	0.63546	0.961143	0.903887	2.01358	0.952995	3.7033	1.2235	4.05901	1.9644	5.54637	13.599
0.818394	0.309689	0.964163	3.38164	1.43781	0.953509	0.4204	1.05475	4.9229	9.53609	2.14479	2.64348	1.38433	13.9711	1.46019	4.51116
1.01234	0.194031	6.08639	0.441429	1.48747	0.690913	0.81242	1.82054	1.26933	1.02761	3.09475	3.44544	3.14179	3.40171	4.87888	1.05347
12.2389	2.23572		2.74113	2.66559			3.23234	0.694588	6.697		1.74232	4.462	12.7094	17.2519	3.00584
1.46625	0.484846	1.72076	1.8159	5.67967	2.20486	2.48847	1.98368	1.02822	0.370815	0.804616	0.684826	2.81025	1.47128	1.70864	1.1495
0.513496	0.4793	0.446977	4.19303	1.21889	2.90424	2.09388	0.667481	1.697	1.04397	0.987463	1.08968	1.05693	1.83559	2.04193	2.78941
0.23965	1.871	7.8706	3.11094	3.32507	2.3431	1.36015	1.00618	0.589658	1.51392	2.51173	1.81424	2.91193	3.21862	0.839024	1.60954
0.193938	0.700443	0.389962	8.4684	1.45916	3.54186	1.17794	0.298538	1.17305	1.14894	1.03671	0.6885	1.53922	1.8491	1.20664	6.39597
0.253039	0.4202	1.07991	2.34344	1.84722	1.72408	2.74058	1.04614	0.791015	1.67695	1.80753	3.54125	0.720823	5.51074	2.9224	4.39898
1.00904	0.55942	0.298751	1.61346	1.82667	1.88363	0.654304	1.51218	0.861419	1.54621	3.31867	1.30651	0.5839	1.17124	0.791227	3.41169
0.909216	0.896165	0.863716	2.03173	2.93736	0.701888	1.06384	1.96657	1.07659	1.46791	1.43683	1.0519	0.656177	2.3234	2.44738	0.849815
0.42783	1.50759	1.5066	1.0629	2.12173	6.86536	1.70051	1.48778	1.22135	1.91594	1.47128	1.48411	3.7131	4.90496	0.401266	3.08115
0.438834	0.540061	1.55204	2.03523	2.87716	0.819364	0.589658	1.35785	1.67241	0.878977	0.675324	1.56062	0.608593	6.9396	1.22545	2.29401
0.60808	0.812056	2.05945	5.16872	4.68724	3.17285	0.485152	0.667693	0.961554	1.23215	1.33696	1.73464	2.85844	1.42048	3.96332	2.29604
0.621981	0.304296	1.39188	1.07846	2.45616	0.605132	1.23287	0.543947	1.43552	1.72151	0.880566	1.94483	1.85881	2.63205	2.05898	2.9417
0.365269	3.34467	0.525012	1.40275	0.745728	2.23338	2.91183	0.739757	1.16572	1.98688	4.19539	2.35933	1.26131	5.27882	3.75916	5.15874
0.562881	0.618118	1.09393	1.21927	0.780136	0.290908	0.681082	0.829096	2.30539	3.33834	1.6427	0.766747	1.14353	6.83618	1.90228	2.95458
0.317685	0.279604	1.33768	2.22559	3.39831	0.387877	1.64659	0.848243	1.88733	0.878977	3.71338	2.42366	2.19248	2.49981	5.23007	3.24518
0.311927	1.20064	1.14345	2.45849	1.37375	0.298538	1.25576	0.850115	0.947297	1.16225	2.0759	5.65471	1.74748	1.9904	0.792799	3.23522
0.57115	0.970964	0.473542	0.680869	0.680869	2.27664	0.945212	1.00315	0.732339	0.650631	3.97774	2.49269	3.5962	2.82323	1.64386	2.91045
0.304296	0.609019	1.31832	0.750973	1.0199	0.914974	1.25842	0.730681	1.23978	0.465912	4.46912	0.867177	1.84834	3.70657	1.55584	2.84283
0.409108	0.667693	0.90367	0.861632	0.954927	1.46442	0.816346	0.96277	0.530558	2.09074	1.91187	0.570511	1.63613	4.66563	2.61164	1.71858
0.631184	0.745515	0.621468	1.66236	1.31971	0.336619	0.901585	0.175004	0.675023	2.2324	1.52412	3.7354	3.22718	6.24241	2.28053	4.47813
0.513708	0.822737	0.962307	0.878977	2.37453	2.46534	0.836939	0.258585	1.01698	1.04405	1.46193	5.18336	2.57515	1.75255	0.640916	3.2603
0.640916	0.614138	0.344462	2.08562	4.41466	0.844357	0.939153	0.279604	0.387576	1.39105	0.821466	3.77988	2.82181	2.73803	3.37362	2.56596
0.511623	0.773409	2.19669	2.54072	4.0669	1.91489	2.10284	0.584113	0.382331	0.909216	1.21789	2.51645	5.48733	2.03275	1.42129	1.5969
0.408896	0.241522	2.06343	2.0427	2.56788	0.368943	0.850115	0.764662	0.906618	0.802531	1.70995	1.71341	1.70934	1.27065	1.81474	1.40629
1.27292	1.1747	0.863504	3.32861	0.350008	0.525012	1.09032	1.78577	0.869474	1.09019	2.39215	1.18161	3.5554	2.57783	0.947297	1.29384
0.389962	1.19458	2.22722	3.6419	2.0876	2.38319	3.32344	0.363397	0.39572	0.818004	1.26707	4.52338	2.73241	3.20642	2.14544	2.28426
0.530558	0.414141	2.27862	2.18339	2.19662	2.41944	1.26447	0.428043	1.55764	0.954715	1.01194	2.90584	1.68899	5.47399	4.26226	4.4832
0.991207	0.486931	0.896039	3.59884	2.43556	1.3133	0.962558	0.220716	1.13202	1.69604	1.34447	1.12273	5.5842	4.47796	2.48206	4.62714
0.594904	1.74667	1.15261	1.10114	1.29376	0.63537	1.1246	0.701888	0.922817	0.820089	1.69177	4.14323	1.69389	1.79868	3.40362	1.25108
0.408896	1.00778	2.10353	5.2912	2.96163	0.817792	1.1925	0.096969	2.67931	0.750761	1.25799	2.85048	5.80102	3.16501	1.86922	2.6175
1.44142	0.81592	2.1597	1.34885	1.97693	1.41381	0.804315	0.505865	1.40902	3.23694	0.942615	4.74112	5.38061	3.81465	3.12845	3.11531
0.726581	1.10315	3.38266	0.720823	3.21837	3.01541	0.50795	1.25785	1.13202	1.29492	0.603047	1.67081	1.54564	6.18383	3.6207	2.13888
0.677196	0.917058	0.928362	2.57393	2.41334	1.6572	0.694258	1.26685	1.3176	1.47261	1.63688	2.52567	3.50758	2.29092	2.98932	5.29411
0.629311	0.653792	3.34673	3.24188	5.6257	2.71058	0.330861	0.538188	0.920007	1.39742	0.829308	2.71516	1.43926	2.50519	2.8873	3.48353
1.07867	1.05398	1.17368	3.31759	2.48546	1.08601	0.916846	2.82623	2.42381	2.32213	1.46429	1.9675	2.09689	3.34483	1.64117	2.21494
0.578142	0.909216	2.27398	2.97362	1.68739	0.412875	2.67907	1.3489	1.41572	1.23423	1.62159	2.89094	1.9712	4.4214	2.69812	2.63431
0.492689	0.428043	2.44465	4.38768	2.57435	1.16664	2.74676	2.50817	1.37483	1.50264	1.47554	3.23575	1.77005	1.65771	1.86408	2.97646
1.27023	1.15095	3.00672	4.35633	4.50122	3.58833	0.9113	3.3901	1.13569	1.74035	1.46881	1.80906	1.65955	1.80734	2.66841	4.33718
0.532643	0.656177	1.36727	3.33456	3.5349	0.531197	0.4793	2.10813	0.857746	0.960473	1.55581	4.14491	3.8723	2.83692	3.7377	3.32945
0.519254	0.557974	1.07723	2.18002	2.53377	0.884735	2.07029	0.584113	1.65046	4.47126	1.10681	1.91753	2.71166	3.2837	1.64521	3.25111
0.610677	0.597289	0.798557	0.694258	3.00154	0.976722	0.974501	0.498235	1.14639	1.60685	3.89744	2.38809	2.84923	2.49677	3.764	3.19166
0.627527	2.07829	1.12776	3.0624	2.87887	1.97036	0.980553	0.627527	1.53593	1.54477	2.04751	0.707647	5.53219	2.63955	1.84323	2.54514
0.953361	0.715065	0.433589	3.05715	1.71447	2.46281	0.498235	0.454608	1.23531	1.43589	3.39137	3.21423	1.80378	0.802531	1.28643	1.78411
0.737585	0.999914	3.41623	2.43158	0.486931	4.46901	1.09372	0.772505	1.07795	1.38417	3.47481	3.13162	2.48877	2.01992	4.18686	2.00493
0.656177	1.88808	2.77509	5.40211	0.981492	0.285362	1.61209	0.545819	1.71028	2.70193	3.12941	4.30097	2.74521	1.24532	4.21018	3.52801
0.384203	2.03446	0.823763	3.0091	3.26014	3.99659	0.513708	0.57627	1.55084	1.33358	2.51242	3.88315	2.35563	0.947723	2.52465	2.5059
0.513195	1.04929	0.551577	3.29839	0.624066	3.62011	1.09185	1.7855	1.34416	1.69813	2.13683	1.04059	1.64358	3.77615	3.62174	2.18005
0.441219	1.16195	3.85925	0.699804	5.50864	0.877601	0.829308	1.15284	1.01194	2.21662	4.23667	3.93907	2.5524	4.13638	2.31293	2.78863
0.637455	1.13735	2.15113	0.844357	3.70674	0.311927	0.241522	0.258585	0.597289	1.01143	1.84837	4.06233	2.21386	0.857746	3.66131	2.89016
0.546031	0.769395	0.819877	2.81053	3.9728	1.15001	0.568126	0.960473	0.887684	3.98676	4.99542	2.85705	1.52532	3.62733	4.22607	2.08779
0.447616	0.590297	0.909216	3.55553	2.02067	4.28057	0.890069	2.74511	0.863203	2.0307	4.16997	3.08062	5.94041	0.616223	3.29249	2.67943
0.787063	1.95893	0.715065	0.840683	1.30515	0.513496	0.266428	1.26447	1.26655	2.28076	1.83573	2.08923	2.48311	4.77757	3.28041	4.67143
0.637455	0.40335	4.3046	6.57706	2.06206	2.18457	1.13223	1.02389	0.646161	1.74722	2.76583	4.38102	5.55099	1.73129	1.58453	2.09896
0.798858	0.900559	0.755018	0.69136	0.556822	0.861419	0.548891	0.61255	1.85886	0.85054	1.43046	3.29002	1.47807	3.17969	5.67751	3.55705
1.50705	1.0272	0.834854	4.20733	2.08082	0.667481	0.428043	0.825847	0.699503	1.30557	0.995093	4.36271	3.26975	2.65561	1.95033	4.2931
0.682954	0.734211	3.05933	6.319	2.03767	0.899626	2.1533	1.11676	0.93578	1.81135	1.38578	2.12104	0.998254	2.45477	4.52606	4.22829
0.424157	0.532643	1.38695	2.30059	2.1978	0.699804	1.94179	1.21572	1.49474	2.13092	2.0127	3.36511	3.85153	2.69901	3.19905	5.15216
0.357639	0.709519	1.4635	1.58553	4.287	3.96255	1.85631	0.728666	1.8018	0.998041	1.88541	2.37827	1.2952	1.11078	1.31365	3.06285
0.331074	1.66611	0.610465	2.22962	2.45351	1.82645	2.66231	0.521126	1.35236	1.48558	0.815407	3.22184	3.4735	3.5289	4.67623	4.65442
0.363184	0.389962	0.562881	7.05046	4.70699	0.551789	1.08422	1.85089	0.578354	0.350434	0.530558	4.1669	2.87783	1.0038	0.621981	2.90987
0.460154	0.66999	3.26781	2.29781	2.53838	2.77321	0.535803	0.925765	0.954414	0.618095	0.912376	2.24789	2.52024	3.03675	4.50016	1.67072
				0.578142	0.572809	0.753146	1.70838			1.2269	3.17168	4.27768
0.806701	0.785681	0.446977	0.355554	1.0264	0.979407	0.479072	0.551527	0.681184	0.637151	2.00841	2.6757	2.80866	2.40374	4.23692	3.29313
0.53243	0.207327	0.4793	1.17829	1.03058	2.05865	3.28679	0.621385	0.355084	0.292853	0.241407	1.48153	2.86549	1.82345	5.5165	5.03335
0.492689	0.207327	1.46969	0.532643	0.694258	0.597289	0.470933	0.344086	1.63894	0.188303	2.55214	3.35158	1.61975	3.90123	2.18569	1.29012
0.608593	0.470081	1.54859	0.766535	1.42096	0.616436	0.640611	0.631183	0.922377	6.33011	0.829979	1.84584	5.12431	2.67836	3.79707	4.17387
0.565178	0.487143	0.862058	1.18812	0.85983	0.806701	0.193846	0.608303	0.252918	0.285226	0.481156	0.655564	3.28882	3.8413	2.37126	3.85958
0.570511	1.26763	1.33457	0.840896	0.519254	2.80662	0.247163	0.304152	0.401075	0.551314	4.14102	0.900643	0.704713	1.49096	3.93449	2.34227
0.871347	0.629612	0.368943	1.96261	0.441219	0.797624	1.29418	0.325161	0.306023	0.096923	0.65096	0.964965	3.13445	3.20702	3.17619	3.42665
0.602834	0.570724	1.70075	0.45482	0.344462	0.374188	0.401075	0.494326	0.292853	0.861009	0.560813	0.650109	1.97554	1.46133	2.68595	3.7861
0.42783	0.207327	0.684848	0.783084	0.214958	0.290908	0.471872	0.161538	0.349841	0.304152	1.57237	1.45197	4.14042	2.85056	0.672918	5.21428
0.530257	0.110358	0.226262	0.226262	0.032323	0.506078	0.275821	0.789825	0.201685	0.174921	0.780933	0.467774	0.325161	4.38958	4.91801	2.06106
0.350008	0.409108	0.974074	0.621981	0.713192	1.08738	0.311778	0.155995	0.332787	0.643121	2.53673	3.71219	0.401075	2.37907	3.38134	2.56248
0.387877	0.991983	0.707647	5.65724	0.454608	1.43141	0.239536	0.142613	0.193846	1.26135	2.80206	2.39436	1.03606	2.47722	4.36975	5.04347
1.17211	0.819664	0.543947	2.00197	3.86162	0.604919	0.239536	0.226154	0.349841	3.15012	0.650321	1.65814	1.44229	1.44513	0.908995	4.36047
0.487143	1.18725	0.631696	1.60146	0.685689	0.304296	0.096923	0.169165	2.39487	3.23493	0.395319	1.07428	1.81884	0.758543	0.239536	5.70688
0.627527	1.87693	2.57545	1.33328	0.406511	0.556822	0.129231	0.382149	1.3284	1.38524	0.97162	0.891451	2.27104	3.2202	3.80524	1.57369
0.556822	0.895614	0.763937	0.727007	1.54918	0.42783	0.378265	0.214855	0.096923	0.817615	1.88149	1.17962	2.41591	0.69414	3.54131	3.04273
0.416739	0.99309	0.581815	1.224	0.882438	0.766535	0.161538	0.403158	0.220611	2.32157	2.21445	0.487125	1.95036	1.55123	4.28015	1.64777
0.699804	0.810162	0.8522	0.541049	3.75789	1.23948	0.271844	0.317534	1.08316	1.82855	1.92751	0.422084	3.64335	3.17259	5.37231	3.65427
0.543947	0.460366	0.511623	0.804403	1.66782	0.673239	0.247163	4.00529	0.169165	0.446765	3.33315	0.684522	2.22952	3.7607	2.84912	2.30622
0.484846	0.4793	0.53213	0.650843	1.48284	0.780217	0.634855	0.290769	0.239536	2.50678	3.54285	1.97029	1.54411	3.01841	2.46887	2.96797
0.330861	0.519466	0.433589	1.69055	1.13707	1.72964	0.341702	0.338543	1.14887	1.12762	0.408701	1.71407	2.97566	0.836541	2.82108	4.47231
0.414654	0.525012	1.13732	0.762065	1.41321	1.14576	1.96774	1.1768	0.304152	0.258462	3.67077	2.43371	3.60246	2.37241	3.07373	5.58106
0.473755	0.355554	0.484846	0.543947	0.65985	0.690584	0.161538	0.360627	0.266301	4.03636	3.42198	2.69057	1.49288	0.876687	1.75129	1.02527
0.610465	0.951466	0.732127	0.732339	1.13288	1.54875	0.790851	0.519219	2.37086	0.583622	1.70123	2.00543	3.69029	3.4176	2.58265	2.16361
0.610677	0.578142	0.292992	2.0166	0.368943	1.15671	1.59715	0.583622	0.696011	0.864942	1.25121	0.519007	4.78127	4.98891	3.66351	3.13217
0.376785	0.403138	0.530558	0.772293	0.902701	1.59763	0.537632	0.872946	0.279471	0.435254	4.19095	3.05687	1.4147	1.83833	4.06695	4.49678
0.317685	0.760776	0.23965	0.616223	2.4624	0.924476	0.553186	0.239536	0.635068	0.304152	2.93479	1.58007	1.93531	2.97909	3.60341	2.18743
0.467996	0.572596	0.672726	1.49879	1.28088	0.694258	0.905323	0.435466	0.226154	0.416328	2.35929	2.29824	1.80607	3.02222	2.75884	6.96959
0.4199	0.648546	0.196023	0.368943	1.49195	1.43089	0.401075	0.553398	0.207228	0.355385	2.21989	1.19371	0.271844	4.59357	1.65349	0.992449
0.350008	0.720823	1.55007	0.603047	1.03296	0.371027	5.14475	0.433382	0.220611	0.322777	1.86704	2.90089	1.82111	3.52418	3.4833	1.43333
0.63537	0.643	0.389962	1.24439	1.17305	0.368943	0.61593	0.875264	0.408701	0.319617	2.25459	3.09575	0.330704	3.71114	3.53315	5.49409
0.414654	0.311927	0.285362	1.14835	2.08405	0.279604	1.36694	0.543688	0.854865	0.627228	3.89906	4.54924	2.02489	4.78912	5.10456	5.91606
0.53213	0.57627	0.667819	0.69447	0.686115	0.760989	0.524762	2.16813	0.372722	0.271844	0.446765	2.50307	0.40934	2.24532	3.33139	0.454391
0.557335	0.494561	2.55149	4.52744	0.694258	0.331074	0.395319	0.330916	0.505837	1.61193	0.688172	0.715149	3.04699	3.18875	3.25134	1.85875
0.688925	0.589658	0.597289	0.646161	0.838811	0.831393	0.414457	0.604419	0.258462	0.330704	1.61039	4.29893	3.33152	4.65353	3.23736	5.26833
0.718951	1.1965	0.953481	1.09969	1.39039	0.484846	0.096923	0.317534	1.35323	1.88569	0.311778	2.54098	2.52218	3.39533	4.06969	3.67415
0.543947	1.25965	1.177	0.433589	1.48175	0.511623	0.207228	0.285226	0.357468	1.47935	1.96817	4.17144	4.73122	2.27058	2.79411	3.66813
0.57627	1.19301	0.654304	1.13454	2.51861	1.90804	0.10455	0.161538	0.349841	1.66522	2.5692	2.37808	4.02565	1.34676	3.90449	3.57649
0.602834	1.26404	1.33509	0.572596	0.207327	1.17146	0.271844	0.174921	0.513464	4.51517	3.04047	2.46843	0.787179	2.76303	3.4251	3.38123
0.486931	0.938641	0.796985	0.517169	0.726581	0.4793	0.136858	0.519219	0.830785	1.16149	1.00059	3.53692	3.65607	0.675428	3.36542	4.40118
0.751274	0.39572	0.728666	0.473542	1.19645	0.983577	0.271844	0.201473	3.00182	1.3872	3.01557	3.36311	5.38329	1.794	3.22256	5.32568
0.789426	0.637455	1.86107	1.02512	0.998554	0.751274	0.285226	0.454604	0.597004	2.52071	1.03226	2.87757	2.70589	3.15238	2.63169	5.73233
0.557335	0.857958	0.441219	1.52587	1.01719	1.63332	0.258462	0.479072	0.671118	0.441009	1.74454	2.73629	2.12769	3.78679	2.06503	5.67237
0.557335	0.682954	0.382331	1.87353	1.16017	0.532643	0.538145	0.340414	0.635068	0.500081	2.30912	2.07424	3.16723	5.15556	3.4081	5.61783
0.707346	0.785681	0.376573	0.760989	1.03275	0.643	0.220611	0.532389	0.220611	0.519007	1.24473	2.8703	4.2464	7.21138	0.94714	4.88836
0.492689	1.13756	0.81592	0.578354	0.492689	1.54257	0.247163	0.641249	0.142613	0.574429	2.41195	2.45905	6.203	4.72838	2.7875	4.35372
0.731981	0.519254	0.591531	0.604919	1.0974	0.93548	0.174921	0.408914	0.629524	0.57024	3.37093	1.28369	1.99957	5.28273	2.26157	4.73284
0.45482	0.253039	1.21026	1.42314	3.04778	0.538401	0.032308	0.790338	0.214855	0.538571	1.99822	4.11356	1.88152	3.7383	2.17825	6.76958
0.169246	0.363397	0.777839	0.4202	0.401266	2.18099	0.174921	0.363011	0.258462	1.14278	0.704713	1.42358	0.70366	7.82261	5.12078	3.42461
0.207327	0.271973	0	0.707134	0.635158	1.25389	0.304152	0.446765	1.75885	1.62291	3.08494	1.18314	4.79047	5.18095	2.50599	5.70958
0.785681	0.982131	0.188393	0.643	1.22063	2.30982	0.578079	0.395531	0.416328	1.03226	0.873879	0.876475	5.77809	2.94558	2.77628	1.71313
0.757337	0.513496	0.336619	0.589658	0.718951	1.00043	0.363224	1.71178	0.252918	0.428265	1.09896	4.21961	4.04489	1.45591	1.34352	3.80609
0.241522	0.266428	0.175004	1.47605	0.308276	1.09991	0.174921	0.271844	0.096923	2.90897	1.3532	3.0942	4.57948	3.46726	2.11623	4.00803
0.497934	0.770208	1.11287	0.492689	0.5839	0.79144	0.032308	0.604631	0.193846	4.51072	0.566568	1.17508	3.26755	4.47354	2.71578	6.86484
0.999488	0.844569	0.71865	1.19467	0.856086	2.2095	2.16955	0.142613	0.161538	2.91677	0.382149	4.0835	2.73934	6.54798	4.52899	5.70158
0.559207	0.500532	1.3422	1.0272	2.80376	0.733999	0.370638	0.572536	1.08212	0.801849	0.433382	2.54504	2.09987	1.84739	6.39596	5.90076
0.655876	0.460154	0.939666	0.707434	0.5248	0.452523	0.096923	0.188303	2.19817	0.629312	3.82904	0.756159	6.02183	4.54092	3.72485	2.91248
0.509844	0.247493	0.785469	3.50185	0.530558	2.42217	0.193846	0.161538	0.513251	0.687872	3.27565	3.58832	4.37278	5.35578	5.46933	5.75449
0.401266	0.498235	0.446977	0.692457	0.936205	1.40326	0.110305	1.62112	0.233781	0.532389	2.12759	1.74827	3.72314	4.36784	4.17262	5.03707
1.13309	0.465912	0.5839	0.285362	1.18255	1.0159	0.174921	0.142613	0.349841	4.27178	0.97361	1.06478	3.27718	3.66264	5.21115	5.15084
0.368943	0.796773	2.46293	0.401266	0.753146	1.66245	0.271844	0.296012	0.330916	0.693928	0.610387	1.87267	7.1393	1.56278	3.5265	2.50626
0.446977	0.528969	0.486931	0.207327	0.175004	0.465912	0.330704	0.608303	1.56665	0.619907	2.73647	2.38813	5.27992	2.03012	5.87884	6.50507
0.4199	1.02512	0.783084	0.498235	0.226262	0.382331	0.745373	0.290769	0.368767	0.963993	0.559154	2.73404	1.01909	4.58972	3.38176	5.97449
0.637455		0.540273	0.834854	0.304296	1.75946	0.446765	0.975482	0.42971	3.63642	2.44201	2.98933	2.20129	3.35528	4.21272	6.13609
						4.61432					2.87866
											3.18141
											1.13681
											2.11434
											3.0251

## Sheet: Fig 5B speed tracks
Cell speed tracking data presented in Fig 5B.
Each cell track has a unique track_ID, which links it to the cell parameters shown in the sheet "Fig5C cell parameters"
track_ID	slice	X	Y	distance (µm)	instantaneous speed (µm/min)	Time (h)	day	fate	Rolling average speed (µm/min)
1	10	777	134	-1	-0.5	1	1	nd	NA
1	11	776	134	0.635	0.3175	1.03333	1	nd	NA
1	12	777	134	0.635	0.3175	1.06667	1	nd	0.027
1	13	777	134	0	0	1.1	1	nd	0.127
1	14	777	134	0	0	1.13333	1	nd	0.127
1	15	777	134	0	0	1.16667	1	nd	0.0635
1	16	777	133	0.635	0.3175	1.2	1	nd	0.127
1	17	777	133	0	0	1.23333	1	nd	0.2168
1	18	777	134	0.635	0.3175	1.26667	1	nd	0.3066
1	19	778	135	0.898	0.449	1.3	1	nd	0.3066
1	20	777	136	0.898	0.449	1.33333	1	nd	0.3066
1	21	777	137	0.635	0.3175	1.36667	1	nd	0.3701
1	22	777	137	0	0	1.4	1	nd	0.2803
1	23	777	139	1.27	0.635	1.43333	1	nd	0.254
1	24	777	139	0	0	1.46667	1	nd	0.1905
1	25	777	138	0.635	0.3175	1.5	1	nd	0.1905
1	26	777	138	0	0	1.53333	1	nd	0.0635
1	27	777	138	0	0	1.56667	1	nd	0.0635
1	28	777	138	0	0	1.6	1	nd	0
1	29	777	138	0	0	1.63333	1	nd	0.0635
1	30	777	138	0	0	1.66667	1	nd	0.0635
1	31	777	137	0.635	0.3175	1.7	1	nd	0.127
1	32	777	137	0	0	1.73333	1	nd	0.1905
1	33	777	136	0.635	0.3175	1.76667	1	nd	0.1905
1	34	778	136	0.635	0.3175	1.8	1	nd	0.1905
1	35	778	136	0	0	1.83333	1	nd	0.1905
1	36	778	137	0.635	0.3175	1.86667	1	nd	0.127
1	37	778	137	0	0	1.9	1	nd	0.1905
1	38	778	137	0	0	1.93333	1	nd	0.254
1	39	780	137	1.27	0.635	1.96667	1	nd	0.254
1	40	781	137	0.635	0.3175	2	1	nd	0.3175
1	41	780	137	0.635	0.3175	2.03333	1	nd	0.3175
1	42	779	137	0.635	0.3175	2.06667	1	nd	0.1905
1	43	779	137	0	0	2.1	1	nd	0.127
1	44	779	137	0	0	2.13333	1	nd	0.0635
1	45	779	137	0	0	2.16667	1	nd	0
1	46	779	137	0	0	2.2	1	nd	0
1	47	779	137	0	0	2.23333	1	nd	0.0635
1	48	779	137	0	0	2.26667	1	nd	0.0635
1	49	778	137	0.635	0.3175	2.3	1	nd	0.0635
1	50	778	137	0	0	2.33333	1	nd	0.0635
1	51	778	137	0	0	2.36667	1	nd	0.127
1	52	778	137	0	0	2.4	1	nd	0.0635
1	53	777	137	0.635	0.3175	2.43333	1	nd	0.127
1	54	777	137	0	0	2.46667	1	nd	0.1905
1	55	778	137	0.635	0.3175	2.5	1	nd	0.1905
1	56	778	138	0.635	0.3175	2.53333	1	nd	0.127
1	57	778	138	0	0	2.56667	1	nd	0.127
1	58	778	138	0	0	2.6	1	nd	0.0635
1	59	778	138	0	0	2.63333	1	nd	0
1	60	778	138	0	0	2.66667	1	nd	0
1	61	778	138	0	0	2.7	1	nd	0
1	62	778	138	0	0	2.73333	1	nd	0.142
1	63	778	138	0	0	2.76667	1	nd	0.142
1	64	779	136	1.42	0.71	2.8	1	nd	0.142
1	65	779	136	0	0	2.83333	1	nd	0.2055
1	66	779	136	0	0	2.86667	1	nd	0.2055
1	67	779	135	0.635	0.3175	2.9	1	nd	0.127
1	68	779	135	0	0	2.93333	1	nd	0.127
1	69	779	134	0.635	0.3175	2.96667	1	nd	0.1905
1	70	779	134	0	0	3	1	nd	0.127
1	71	779	135	0.635	0.3175	3.03333	1	nd	0.127
1	72	779	135	0	0	3.06667	1	nd	0.0635
1	73	779	135	0	0	3.1	1	nd	0.127
1	74	779	135	0	0	3.13333	1	nd	0.0635
1	75	780	135	0.635	0.3175	3.16667	1	nd	0.0635
1	76	780	135	0	0	3.2	1	nd	0.127
1	77	780	135	0	0	3.23333	1	nd	0.1905
1	78	780	134	0.635	0.3175	3.26667	1	nd	0.127
1	79	780	133	0.635	0.3175	3.3	1	nd	0.127
1	80	780	133	0	0	3.33333	1	nd	0.1905
1	81	780	133	0	0	3.36667	1	nd	0.127
1	82	781	133	0.635	0.3175	3.4	1	nd	0.0635
1	83	781	133	0	0	3.43333	1	nd	0.127
1	84	781	133	0	0	3.46667	1	nd	0.127
1	85	781	134	0.635	0.3175	3.5	1	nd	0.0635
1	86	781	134	0	0	3.53333	1	nd	0.0635
1	87	781	134	0	0	3.56667	1	nd	0.127
1	88	781	134	0	0	3.6	1	nd	0.0635
1	89	781	135	0.635	0.3175	3.63333	1	nd	0.0635
1	90	781	135	0	0	3.66667	1	nd	0.0635
1	91	781	135	0	0	3.7	1	nd	0.0635
1	92	781	135	0	0	3.73333	1	nd	0.0635
1	93	781	135	0	0	3.76667	1	nd	0.0635
1	94	780	135	0.635	0.3175	3.8	1	nd	0.0635
1	95	780	135	0	0	3.83333	1	nd	0.0635
1	96	780	135	0	0	3.86667	1	nd	0.0635
1	97	780	135	0	0	3.9	1	nd	0.0635
1	98	780	135	0	0	3.93333	1	nd	0.0635
1	99	779	135	0.635	0.3175	3.96667	1	nd	0.127
1	100	779	135	0	0	4	1	nd	0.127
1	101	778	135	0.635	0.3175	4.03333	1	nd	0.127
1	102	778	135	0	0	4.06667	1	nd	0.0635
1	103	778	135	0	0	4.1	1	nd	0.0635
1	104	778	135	0	0	4.13333	1	nd	0
1	105	778	135	0	0	4.16667	1	nd	0
1	106	778	135	0	0	4.2	1	nd	0
1	107	778	135	0	0	4.23333	1	nd	0
1	108	778	135	0	0	4.26667	1	nd	0
1	109	778	135	0	0	4.3	1	nd	0
1	110	778	135	0	0	4.33333	1	nd	0
1	111	778	135	0	0	4.36667	1	nd	0.142
1	112	778	135	0	0	4.4	1	nd	0.142
1	113	777	133	1.42	0.71	4.43333	1	nd	0.142
1	114	777	133	0	0	4.46667	1	nd	0.142
1	115	777	133	0	0	4.5	1	nd	0.2055
1	116	777	133	0	0	4.53333	1	nd	0.0635
1	117	777	134	0.635	0.3175	4.56667	1	nd	0.0635
1	118	777	134	0	0	4.6	1	nd	0.1533
1	119	777	134	0	0	4.63333	1	nd	0.1533
1	120	778	135	0.898	0.449	4.66667	1	nd	0.1533
1	121	778	135	0	0	4.7	1	nd	0.2168
1	122	778	134	0.635	0.3175	4.73333	1	nd	0.2168
1	123	779	134	0.635	0.3175	4.76667	1	nd	0.127
1	124	779	134	0	0	4.8	1	nd	0.1905
1	125	779	134	0	0	4.83333	1	nd	0.1905
1	126	779	135	0.635	0.3175	4.86667	1	nd	0.127
1	127	780	135	0.635	0.3175	4.9	1	nd	0.127
1	128	780	135	0	0	4.93333	1	nd	0.127
1	129	780	135	0	0	4.96667	1	nd	0.0635
1	130	780	135	0	0	5	1	nd	0
1	131	780	135	0	0	5.03333	1	nd	0.0635
1	132	780	135	0	0	5.06667	1	nd	0.0635
1	133	781	135	0.635	0.3175	5.1	1	nd	0.1533
1	134	781	135	0	0	5.13333	1	nd	0.1533
1	135	780	134	0.898	0.449	5.16667	1	nd	0.1533
1	136	780	134	0	0	5.2	1	nd	0.1533
1	137	780	134	0	0	5.23333	1	nd	0.1533
1	138	780	133	0.635	0.3175	5.26667	1	nd	0.127
1	139	780	133	0	0	5.3	1	nd	0.127
1	140	779	133	0.635	0.3175	5.33333	1	nd	0.127
1	141	779	133	0	0	5.36667	1	nd	0.0635
1	142	779	133	0	0	5.4	1	nd	0.0635
1	143	779	133	0	0	5.43333	1	nd	0
1	144	779	133	0	0	5.46667	1	nd	0
1	145	779	133	0	0	5.5	1	nd	0
1	146	779	133	0	0	5.53333	1	nd	0.0635
1	147	779	133	0	0	5.56667	1	nd	0.127
1	148	779	132	0.635	0.3175	5.6	1	nd	0.127
1	149	779	131	0.635	0.3175	5.63333	1	nd	0.127
1	150	779	131	0	0	5.66667	1	nd	0.127
1	151	779	131	0	0	5.7	1	nd	0.0635
1	152	779	131	0	0	5.73333	1	nd	0.0635
1	153	779	131	0	0	5.76667	1	nd	0.127
1	154	780	131	0.635	0.3175	5.8	1	nd	0.127
1	155	781	131	0.635	0.3175	5.83333	1	nd	0.127
1	156	781	131	0	0	5.86667	1	nd	0.127
1	157	781	131	0	0	5.9	1	nd	0.0635
1	158	781	131	0	0	5.93333	1	nd	0.0635
1	159	781	131	0	0	5.96667	1	nd	0.0635
1	160	780	131	0.635	0.3175	6	1	nd	0.0635
1	161	780	131	0	0	6.03333	1	nd	0.0635
1	162	780	131	0	0	6.06667	1	nd	0.0635
1	163	780	131	0	0	6.1	1	nd	0
1	164	780	131	0	0	6.13333	1	nd	0.0898
1	165	780	131	0	0	6.16667	1	nd	0.0898
1	166	781	130	0.898	0.449	6.2	1	nd	0.1533
1	167	781	130	0	0	6.23333	1	nd	0.3438
1	168	782	130	0.635	0.3175	6.26667	1	nd	0.4073
1	169	782	133	1.905	0.9525	6.3	1	nd	0.381
1	170	783	133	0.635	0.3175	6.33333	1	nd	0.523
1	171	784	133	0.635	0.3175	6.36667	1	nd	0.4595
1	172	786	134	1.42	0.71	6.4	1	nd	0.3325
1	173	786	134	0	0	6.43333	1	nd	0.3325
1	174	787	134	0.635	0.3175	6.46667	1	nd	0.3325
1	175	788	134	0.635	0.3175	6.5	1	nd	0.2803
1	176	788	133	0.635	0.3175	6.53333	1	nd	0.3438
1	177	787	132	0.898	0.449	6.56667	1	nd	0.3701
1	178	787	131	0.635	0.3175	6.6	1	nd	0.3066
1	179	786	130	0.898	0.449	6.63333	1	nd	0.2431
1	180	786	130	0	0	6.66667	1	nd	0.2168
1	181	786	130	0	0	6.7	1	nd	0.2431
1	182	786	129	0.635	0.3175	6.73333	1	nd	0.1533
1	183	787	130	0.898	0.449	6.76667	1	nd	0.1533
1	184	787	130	0	0	6.8	1	nd	0.2431
1	185	787	130	0	0	6.83333	1	nd	0.1796
1	186	788	131	0.898	0.449	6.86667	1	nd	0.1796
1	187	788	131	0	0	6.9	1	nd	0.1796
1	188	787	130	0.898	0.449	6.93333	1	nd	0.1796
1	189	787	130	0	0	6.96667	1	nd	0.0898
1	190	787	130	0	0	7	1	nd	0.0898
1	191	787	130	0	0	7.03333	1	nd	0
1	192	787	130	0	0	7.06667	1	nd	0.0635
1	193	787	130	0	0	7.1	1	nd	0.2055
1	194	788	130	0.635	0.3175	7.13333	1	nd	0.2055
1	195	790	131	1.42	0.71	7.16667	1	nd	0.269
1	196	790	131	0	0	7.2	1	nd	0.3325
1	197	790	132	0.635	0.3175	7.23333	1	nd	0.3325
1	198	789	132	0.635	0.3175	7.26667	1	nd	0.1905
1	199	788	132	0.635	0.3175	7.3	1	nd	0.254
1	200	788	132	0	0	7.33333	1	nd	0.254
1	201	789	132	0.635	0.3175	7.36667	1	nd	0.254
1	202	788	132	0.635	0.3175	7.4	1	nd	0.1905
1	203	788	133	0.635	0.3175	7.43333	1	nd	0.1905
1	204	788	133	0	0	7.46667	1	nd	0.2168
1	205	788	133	0	0	7.5	1	nd	0.1533
1	206	787	132	0.898	0.449	7.53333	1	nd	0.1796
1	207	787	132	0	0	7.56667	1	nd	0.3216
1	208	786	131	0.898	0.449	7.6	1	nd	0.3851
1	209	787	129	1.42	0.71	7.63333	1	nd	0.2953
1	210	787	128	0.635	0.3175	7.66667	1	nd	0.2953
1	211	787	128	0	0	7.7	1	nd	0.2055
1	212	787	128	0	0	7.73333	1	nd	0.0635
1	213	787	128	0	0	7.76667	1	nd	0
1	214	787	128	0	0	7.8	1	nd	0.0635
1	215	787	128	0	0	7.83333	1	nd	0.127
1	216	787	129	0.635	0.3175	7.86667	1	nd	0.127
1	217	787	130	0.635	0.3175	7.9	1	nd	0.2168
1	218	787	130	0	0	7.93333	1	nd	0.2803
1	219	788	131	0.898	0.449	7.96667	1	nd	0.2168
1	220	787	131	0.635	0.3175	8	1	nd	0.1533
1	221	787	131	0	0	8.03333	1	nd	0.1533
1	222	787	131	0	0	8.06667	1	nd	0.3175
1	223	787	131	0	0	8.1	1	nd	0.483
1	224	791	131	2.54	1.27	8.13333	1	nd	0.5728
1	225	793	128	2.29	1.145	8.16667	1	nd	0.7524
1	226	794	127	0.898	0.449	8.2	1	nd	0.8159
1	227	792	125	1.796	0.898	8.23333	1	nd	0.6889
1	228	791	125	0.635	0.3175	8.26667	1	nd	0.5234
1	229	791	123	1.27	0.635	8.3	1	nd	0.4971
1	230	790	123	0.635	0.3175	8.33333	1	nd	0.381
1	231	790	124	0.635	0.3175	8.36667	1	nd	0.3175
1	232	790	125	0.635	0.3175	8.4	1	nd	0.3325
1	233	790	125	0	0	8.43333	1	nd	0.3325
1	234	792	124	1.42	0.71	8.46667	1	nd	0.3588
1	235	791	124	0.635	0.3175	8.5	1	nd	0.2953
1	236	790	123	0.898	0.449	8.53333	1	nd	0.2953
1	237	790	123	0	0	8.56667	1	nd	0.3438
1	238	790	123	0	0	8.6	1	nd	0.2803
1	239	790	126	1.905	0.9525	8.63333	1	nd	0.254
1	240	790	126	0	0	8.66667	1	nd	0.3175
1	241	790	127	0.635	0.3175	8.7	1	nd	0.4073
1	242	789	127	0.635	0.3175	8.73333	1	nd	0.2168
1	243	788	128	0.898	0.449	8.76667	1	nd	0.2168
1	244	788	128	0	0	8.8	1	nd	0.1533
1	245	788	128	0	0	8.83333	1	nd	0.0898
1	246	788	128	0	0	8.86667	1	nd	0.0898
1	247	788	128	0	0	8.9	1	nd	0.1533
1	248	787	127	0.898	0.449	8.93333	1	nd	0.1533
1	249	786	127	0.635	0.3175	8.96667	1	nd	0.1533
1	250	786	127	0	0	9	1	nd	0.2168
1	251	786	127	0	0	9.03333	1	nd	0.127
1	252	786	126	0.635	0.3175	9.06667	1	nd	0.0635
1	253	786	126	0	0	9.1	1	nd	0.0635
1	254	786	126	0	0	9.13333	1	nd	0.0635
1	255	786	126	0	0	9.16667	1	nd	-1.11e-17
1	256	786	126	0	0	9.2	1	nd	0.142
1	257	786	126	0	0	9.23333	1	nd	0.284
1	258	784	127	1.42	0.71	9.26667	1	nd	0.284
1	259	782	126	1.42	0.71	9.3	1	nd	0.426
1	260	782	126	0	0	9.33333	1	nd	0.426
1	261	781	124	1.42	0.71	9.36667	1	nd	0.3475
1	262	781	124	0	0	9.4	1	nd	0.2055
1	263	781	123	0.635	0.3175	9.43333	1	nd	0.2055
1	264	781	123	0	0	9.46667	1	nd	0.127
1	265	781	123	0	0	9.5	1	nd	0.127
1	266	781	122	0.635	0.3175	9.53333	1	nd	0.1533
1	267	781	122	0	0	9.56667	1	nd	0.2431
1	268	780	123	0.898	0.449	9.6	1	nd	0.3066
1	269	779	122	0.898	0.449	9.63333	1	nd	0.2431
1	270	779	123	0.635	0.3175	9.66667	1	nd	0.2431
1	271	779	123	0	0	9.7	1	nd	0.1533
1	272	779	123	0	0	9.73333	1	nd	0.127
1	273	779	123	0	0	9.76667	1	nd	0.0635
1	274	779	124	0.635	0.3175	9.8	1	nd	0.0635
1	275	779	124	0	0	9.83333	1	nd	0.0635
1	276	779	124	0	0	9.86667	1	nd	0.1533
1	277	779	124	0	0	9.9	1	nd	0.1533
1	278	778	125	0.898	0.449	9.93333	1	nd	0.1533
1	279	777	125	0.635	0.3175	9.96667	1	nd	0.2168
1	280	777	125	0	0	10	1	nd	0.2803
1	281	778	125	0.635	0.3175	10.0333	1	nd	0.254
1	282	778	124	0.635	0.3175	10.0667	1	nd	0.1905
1	283	779	124	0.635	0.3175	10.1	1	nd	0.1905
1	284	779	124	0	0	10.1333	1	nd	0.3964
1	285	779	124	0	0	10.1667	1	nd	0.3964
1	286	782	121	2.694	1.347	10.2	1	nd	0.3329
1	287	783	121	0.635	0.3175	10.2333	1	nd	0.3964
1	288	783	121	0	0	10.2667	1	nd	0.5384
1	289	782	121	0.635	0.3175	10.3	1	nd	0.3588
1	290	784	120	1.42	0.71	10.3333	1	nd	0.2953
1	291	785	119	0.898	0.449	10.3667	1	nd	0.3588
1	292	785	119	0	0	10.4	1	nd	0.2953
1	293	786	119	0.635	0.3175	10.4333	1	nd	0.1533
1	294	786	119	0	0	10.4667	1	nd	0.127
1	295	786	119	0	0	10.5	1	nd	0.1905
1	296	786	118	0.635	0.3175	10.5333	1	nd	0.127
1	297	786	117	0.635	0.3175	10.5667	1	nd	0.127
1	298	786	117	0	0	10.6	1	nd	0.1905
1	299	786	117	0	0	10.6333	1	nd	0.2168
1	300	786	116	0.635	0.3175	10.6667	1	nd	0.1533
1	301	787	115	0.898	0.449	10.7	1	nd	0.2168
1	302	787	115	0	0	10.7333	1	nd	0.3066
1	303	786	115	0.635	0.3175	10.7667	1	nd	0.2431
1	304	785	114	0.898	0.449	10.8	1	nd	0.2168
1	305	785	114	0	0	10.8333	1	nd	0.2803
1	306	784	114	0.635	0.3175	10.8667	1	nd	0.2803
1	307	784	113	0.635	0.3175	10.9	1	nd	0.2803
1	308	784	112	0.635	0.3175	10.9333	1	nd	0.2803
1	309	785	113	0.898	0.449	10.9667	1	nd	NA
1	310	785	113	0	0	11	1	nd	NA
2	10	592	223	-1	-0.5	1	1	d	NA
2	11	593	225	1.42	0.71	1.03333	1	d	NA
2	12	590	224	2.008	1.004	1.06667	1	d	0.3961
2	13	591	224	0.635	0.3175	1.1	1	d	0.4961
2	14	592	225	0.898	0.449	1.13333	1	d	0.4811
2	15	592	225	0	0	1.16667	1	d	0.2803
2	16	594	225	1.27	0.635	1.2	1	d	0.3588
2	17	594	225	0	0	1.23333	1	d	0.269
2	18	596	224	1.42	0.71	1.26667	1	d	0.3325
2	19	596	224	0	0	1.3	1	d	0.396
2	20	596	223	0.635	0.3175	1.33333	1	d	0.4858
2	21	599	223	1.905	0.9525	1.36667	1	d	0.3438
2	22	600	222	0.898	0.449	1.4	1	d	0.4073
2	23	600	222	0	0	1.43333	1	d	0.4073
2	24	600	221	0.635	0.3175	1.46667	1	d	0.2168
2	25	599	221	0.635	0.3175	1.5	1	d	0.2168
2	26	599	221	0	0	1.53333	1	d	0.2168
2	27	598	220	0.898	0.449	1.56667	1	d	0.1533
2	28	598	220	0	0	1.6	1	d	0.1796
2	29	598	220	0	0	1.63333	1	d	0.3216
2	30	597	221	0.898	0.449	1.66667	1	d	0.2318
2	31	596	223	1.42	0.71	1.7	1	d	0.3588
2	32	596	223	0	0	1.73333	1	d	0.3588
2	33	596	225	1.27	0.635	1.76667	1	d	0.3325
2	34	596	225	0	0	1.8	1	d	0.1905
2	35	595	225	0.635	0.3175	1.83333	1	d	0.1905
2	36	595	225	0	0	1.86667	1	d	0.0635
2	37	595	225	0	0	1.9	1	d	0.0635
2	38	595	225	0	0	1.93333	1	d	0.0635
2	39	595	225	0	0	1.96667	1	d	0.0635
2	40	594	225	0.635	0.3175	2	1	d	0.2431
2	41	594	225	0	0	2.03333	1	d	0.2431
2	42	592	223	1.796	0.898	2.06667	1	d	0.2431
2	43	592	223	0	0	2.1	1	d	0.2431
2	44	592	223	0	0	2.13333	1	d	0.2431
2	45	592	224	0.635	0.3175	2.16667	1	d	0.1905
2	46	592	224	0	0	2.2	1	d	0.1905
2	47	594	224	1.27	0.635	2.23333	1	d	0.254
2	48	594	224	0	0	2.26667	1	d	0.1905
2	49	594	225	0.635	0.3175	2.3	1	d	0.1905
2	50	594	225	0	0	2.33333	1	d	0.0635
2	51	594	225	0	0	2.36667	1	d	0.0635
2	52	594	225	0	0	2.4	1	d	0.142
2	53	594	225	0	0	2.43333	1	d	0.2055
2	54	596	226	1.42	0.71	2.46667	1	d	0.2055
2	55	596	225	0.635	0.3175	2.5	1	d	0.2055
2	56	596	225	0	0	2.53333	1	d	0.2055
2	57	596	225	0	0	2.56667	1	d	0.0635
2	58	596	225	0	0	2.6	1	d	0.0635
2	59	596	225	0	0	2.63333	1	d	0.0635
2	60	596	224	0.635	0.3175	2.66667	1	d	0.0635
2	61	596	224	0	0	2.7	1	d	0.0635
2	62	596	224	0	0	2.73333	1	d	0.2055
2	63	596	224	0	0	2.76667	1	d	0.2055
2	64	594	223	1.42	0.71	2.8	1	d	0.2055
2	65	594	224	0.635	0.3175	2.83333	1	d	0.2055
2	66	594	224	0	0	2.86667	1	d	0.2055
2	67	594	224	0	0	2.9	1	d	0.0635
2	68	594	224	0	0	2.93333	1	d	0.0635
2	69	594	224	0	0	2.96667	1	d	0.0635
2	70	594	223	0.635	0.3175	3	1	d	0.127
2	71	594	223	0	0	3.03333	1	d	0.127
2	72	593	223	0.635	0.3175	3.06667	1	d	0.127
2	73	593	223	0	0	3.1	1	d	0.0635
2	74	593	223	0	0	3.13333	1	d	0.127
2	75	593	223	0	0	3.16667	1	d	0.0635
2	76	594	223	0.635	0.3175	3.2	1	d	0.0635
2	77	594	223	0	0	3.23333	1	d	0.0635
2	78	594	223	0	0	3.26667	1	d	0.127
2	79	594	223	0	0	3.3	1	d	0.127
2	80	594	222	0.635	0.3175	3.33333	1	d	0.127
2	81	594	221	0.635	0.3175	3.36667	1	d	0.127
2	82	594	221	0	0	3.4	1	d	0.2168
2	83	594	221	0	0	3.43333	1	d	0.1533
2	84	595	222	0.898	0.449	3.46667	1	d	0.0898
2	85	595	222	0	0	3.5	1	d	0.0898
2	86	595	222	0	0	3.53333	1	d	0.1533
2	87	595	222	0	0	3.56667	1	d	0.0635
2	88	596	222	0.635	0.3175	3.6	1	d	0.0635
2	89	596	222	0	0	3.63333	1	d	0.0635
2	90	596	222	0	0	3.66667	1	d	0.0635
2	91	596	222	0	0	3.7	1	d	-1.11e-17
2	92	596	222	0	0	3.73333	1	d	-1.11e-17
2	93	596	222	0	0	3.76667	1	d	-1.11e-17
2	94	596	222	0	0	3.8	1	d	0.0898
2	95	596	222	0	0	3.83333	1	d	0.0898
2	96	597	223	0.898	0.449	3.86667	1	d	0.0898
2	97	597	223	0	0	3.9	1	d	0.1796
2	98	597	223	0	0	3.93333	1	d	0.1796
2	99	596	222	0.898	0.449	3.96667	1	d	0.0898
2	100	596	222	0	0	4	1	d	0.0898
2	101	596	222	0	0	4.03333	1	d	0.0898
2	102	596	222	0	0	4.06667	1	d	-1.11e-17
2	103	596	222	0	0	4.1	1	d	-1.11e-17
2	104	596	222	0	0	4.13333	1	d	-1.11e-17
2	105	596	222	0	0	4.16667	1	d	-1.11e-17
2	106	596	222	0	0	4.2	1	d	0.0635
2	107	596	222	0	0	4.23333	1	d	0.0635
2	108	596	223	0.635	0.3175	4.26667	1	d	0.0635
2	109	596	223	0	0	4.3	1	d	0.0635
2	110	596	223	0	0	4.33333	1	d	0.0635
2	111	596	223	0	0	4.36667	1	d	-1.11e-17
2	112	596	223	0	0	4.4	1	d	-1.11e-17
2	113	596	223	0	0	4.43333	1	d	0.0635
2	114	596	223	0	0	4.46667	1	d	0.0635
2	115	595	223	0.635	0.3175	4.5	1	d	0.0635
2	116	595	223	0	0	4.53333	1	d	0.0635
2	117	595	223	0	0	4.56667	1	d	0.0635
2	118	595	223	0	0	4.6	1	d	-1.11e-17
2	119	595	223	0	0	4.63333	1	d	-1.11e-17
2	120	595	223	0	0	4.66667	1	d	-1.11e-17
2	121	595	223	0	0	4.7	1	d	0.0635
2	122	595	223	0	0	4.73333	1	d	0.0635
2	123	594	223	0.635	0.3175	4.76667	1	d	0.0635
2	124	594	223	0	0	4.8	1	d	0.0635
2	125	594	223	0	0	4.83333	1	d	0.1533
2	126	594	223	0	0	4.86667	1	d	0.1796
2	127	593	222	0.898	0.449	4.9	1	d	0.1796
2	128	592	221	0.898	0.449	4.93333	1	d	0.1796
2	129	592	221	0	0	4.96667	1	d	0.1796
2	130	592	221	0	0	5	1	d	0.1533
2	131	592	221	0	0	5.03333	1	d	0.0635
2	132	592	220	0.635	0.3175	5.06667	1	d	0.127
2	133	592	220	0	0	5.1	1	d	0.1905
2	134	593	220	0.635	0.3175	5.13333	1	d	0.1905
2	135	593	219	0.635	0.3175	5.16667	1	d	0.127
2	136	593	219	0	0	5.2	1	d	0.127
2	137	593	219	0	0	5.23333	1	d	0.127
2	138	593	219	0	0	5.26667	1	d	0.1533
2	139	593	220	0.635	0.3175	5.3	1	d	0.1533
2	140	592	221	0.898	0.449	5.33333	1	d	0.1533
2	141	592	221	0	0	5.36667	1	d	0.2168
2	142	592	221	0	0	5.4	1	d	0.2168
2	143	592	222	0.635	0.3175	5.43333	1	d	0.2168
2	144	592	221	0.635	0.3175	5.46667	1	d	0.2168
2	145	591	220	0.898	0.449	5.5	1	d	0.2803
2	146	591	220	0	0	5.53333	1	d	0.2168
2	147	591	219	0.635	0.3175	5.56667	1	d	0.1533
2	148	591	219	0	0	5.6	1	d	0.0635
2	149	591	219	0	0	5.63333	1	d	0.0635
2	150	591	219	0	0	5.66667	1	d	-1.11e-17
2	151	591	219	0	0	5.7	1	d	-1.11e-17
2	152	591	219	0	0	5.73333	1	d	0.0635
2	153	591	219	0	0	5.76667	1	d	0.0635
2	154	591	218	0.635	0.3175	5.8	1	d	0.0635
2	155	591	218	0	0	5.83333	1	d	0.1533
2	156	591	218	0	0	5.86667	1	d	0.1533
2	157	592	219	0.898	0.449	5.9	1	d	0.0898
2	158	592	219	0	0	5.93333	1	d	0.0898
2	159	592	219	0	0	5.96667	1	d	0.0898
2	160	592	219	0	0	6	1	d	-1.11e-17
2	161	592	219	0	0	6.03333	1	d	-1.11e-17
2	162	592	219	0	0	6.06667	1	d	0.0635
2	163	592	219	0	0	6.1	1	d	0.0635
2	164	592	220	0.635	0.3175	6.13333	1	d	0.0635
2	165	592	220	0	0	6.16667	1	d	0.0635
2	166	592	220	0	0	6.2	1	d	0.0635
2	167	592	220	0	0	6.23333	1	d	-1.11e-17
2	168	592	220	0	0	6.26667	1	d	-1.11e-17
2	169	592	220	0	0	6.3	1	d	-1.11e-17
2	170	592	220	0	0	6.33333	1	d	-1.11e-17
2	171	592	220	0	0	6.36667	1	d	-1.11e-17
2	172	592	220	0	0	6.4	1	d	0.0635
2	173	592	220	0	0	6.43333	1	d	0.127
2	174	592	219	0.635	0.3175	6.46667	1	d	0.1905
2	175	591	219	0.635	0.3175	6.5	1	d	0.1905
2	176	591	218	0.635	0.3175	6.53333	1	d	0.254
2	177	591	218	0	0	6.56667	1	d	0.1905
2	178	590	218	0.635	0.3175	6.6	1	d	0.127
2	179	590	218	0	0	6.63333	1	d	0.0635
2	180	590	218	0	0	6.66667	1	d	0.0635
2	181	590	218	0	0	6.7	1	d	-1.11e-17
2	182	590	218	0	0	6.73333	1	d	-1.11e-17
2	183	590	218	0	0	6.76667	1	d	-1.11e-17
2	184	590	218	0	0	6.8	1	d	-1.11e-17
2	185	590	218	0	0	6.83333	1	d	0.0635
2	186	590	218	0	0	6.86667	1	d	0.0635
2	187	591	218	0.635	0.3175	6.9	1	d	0.127
2	188	591	218	0	0	6.93333	1	d	0.127
2	189	591	217	0.635	0.3175	6.96667	1	d	0.127
2	190	591	217	0	0	7	1	d	0.0635
2	191	591	217	0	0	7.03333	1	d	0.1905
2	192	591	217	0	0	7.06667	1	d	0.269
2	193	591	219	1.27	0.635	7.1	1	d	0.411
2	194	590	221	1.42	0.71	7.13333	1	d	0.5008
2	195	589	223	1.42	0.71	7.16667	1	d	0.5008
2	196	588	224	0.898	0.449	7.2	1	d	0.4373
2	197	588	224	0	0	7.23333	1	d	0.2953
2	198	587	224	0.635	0.3175	7.26667	1	d	0.1533
2	199	587	224	0	0	7.3	1	d	0.0635
2	200	587	224	0	0	7.33333	1	d	0.127
2	201	587	224	0	0	7.36667	1	d	0.127
2	202	587	223	0.635	0.3175	7.4	1	d	0.1905
2	203	587	224	0.635	0.3175	7.43333	1	d	0.1905
2	204	587	225	0.635	0.3175	7.46667	1	d	0.254
2	205	587	225	0	0	7.5	1	d	0.1905
2	206	586	225	0.635	0.3175	7.53333	1	d	0.127
2	207	586	225	0	0	7.56667	1	d	0.0635
2	208	586	225	0	0	7.6	1	d	0.127
2	209	586	225	0	0	7.63333	1	d	0.127
2	210	586	226	0.635	0.3175	7.66667	1	d	0.1905
2	211	586	227	0.635	0.3175	7.7	1	d	0.1905
2	212	585	227	0.635	0.3175	7.73333	1	d	0.1905
2	213	585	227	0	0	7.76667	1	d	0.127
2	214	585	227	0	0	7.8	1	d	0.0635
2	215	585	227	0	0	7.83333	1	d	-1.11e-17
2	216	585	227	0	0	7.86667	1	d	-1.11e-17
2	217	585	227	0	0	7.9	1	d	-1.11e-17
2	218	585	227	0	0	7.93333	1	d	-1.11e-17
2	219	585	227	0	0	7.96667	1	d	0.0635
2	220	585	227	0	0	8	1	d	0.0635
2	221	584	227	0.635	0.3175	8.03333	1	d	0.127
2	222	584	227	0	0	8.06667	1	d	0.1905
2	223	584	226	0.635	0.3175	8.1	1	d	0.1905
2	224	583	226	0.635	0.3175	8.13333	1	d	0.127
2	225	583	226	0	0	8.16667	1	d	0.254
2	226	583	226	0	0	8.2	1	d	0.1905
2	227	583	228	1.27	0.635	8.23333	1	d	0.1905
2	228	583	228	0	0	8.26667	1	d	0.1905
2	229	583	229	0.635	0.3175	8.3	1	d	0.1905
2	230	583	229	0	0	8.33333	1	d	0.0635
2	231	583	229	0	0	8.36667	1	d	0.1533
2	232	583	229	0	0	8.4	1	d	0.0898
2	233	582	230	0.898	0.449	8.43333	1	d	0.3188
2	234	582	230	0	0	8.46667	1	d	0.4086
2	235	580	227	2.29	1.145	8.5	1	d	0.4984
2	236	579	228	0.898	0.449	8.53333	1	d	0.4721
2	237	578	227	0.898	0.449	8.56667	1	d	0.4721
2	238	579	227	0.635	0.3175	8.6	1	d	0.2431
2	239	579	227	0	0	8.63333	1	d	0.1533
2	240	579	227	0	0	8.66667	1	d	0.0635
2	241	579	227	0	0	8.7	1	d	0.0635
2	242	579	227	0	0	8.73333	1	d	0.127
2	243	578	227	0.635	0.3175	8.76667	1	d	0.127
2	244	578	226	0.635	0.3175	8.8	1	d	0.1905
2	245	578	226	0	0	8.83333	1	d	0.1905
2	246	578	225	0.635	0.3175	8.86667	1	d	0.127
2	247	578	225	0	0	8.9	1	d	0.127
2	248	578	225	0	0	8.93333	1	d	0.127
2	249	578	224	0.635	0.3175	8.96667	1	d	0.0635
2	250	578	224	0	0	9	1	d	0.0635
2	251	578	224	0	0	9.03333	1	d	0.127
2	252	578	224	0	0	9.06667	1	d	0.0635
2	253	579	224	0.635	0.3175	9.1	1	d	0.0635
2	254	579	224	0	0	9.13333	1	d	0.1533
2	255	579	224	0	0	9.16667	1	d	0.2168
2	256	578	225	0.898	0.449	9.2	1	d	0.2168
2	257	578	226	0.635	0.3175	9.23333	1	d	0.2168
2	258	577	226	0.635	0.3175	9.26667	1	d	0.2168
2	259	577	226	0	0	9.3	1	d	0.127
2	260	577	226	0	0	9.33333	1	d	0.0635
2	261	577	226	0	0	9.36667	1	d	-1.11e-17
2	262	577	226	0	0	9.4	1	d	-1.11e-17
2	263	577	226	0	0	9.43333	1	d	-1.11e-17
2	264	577	226	0	0	9.46667	1	d	0.0635
2	265	577	226	0	0	9.5	1	d	0.2055
2	266	576	226	0.635	0.3175	9.53333	1	d	0.2055
2	267	574	225	1.42	0.71	9.56667	1	d	0.2953
2	268	574	225	0	0	9.6	1	d	0.3588
2	269	573	224	0.898	0.449	9.63333	1	d	0.2953
2	270	572	224	0.635	0.3175	9.66667	1	d	0.1533
2	271	572	224	0	0	9.7	1	d	0.1533
2	272	572	224	0	0	9.73333	1	d	0.0635
2	273	572	224	0	0	9.76667	1	d	0.0635
2	274	572	224	0	0	9.8	1	d	0.0635
2	275	572	225	0.635	0.3175	9.83333	1	d	0.127
2	276	572	225	0	0	9.86667	1	d	0.1905
2	277	571	225	0.635	0.3175	9.9	1	d	0.3701
2	278	570	225	0.635	0.3175	9.93333	1	d	0.3066
2	279	568	227	1.796	0.898	9.96667	1	d	0.3701
2	280	568	227	0	0	10	1	d	0.3701
2	281	567	227	0.635	0.3175	10.0333	1	d	0.3701
2	282	566	227	0.635	0.3175	10.0667	1	d	0.3175
2	283	565	227	0.635	0.3175	10.1	1	d	0.3175
2	284	563	227	1.27	0.635	10.1333	1	d	0.3175
2	285	563	227	0	0	10.1667	1	d	0.254
2	286	563	226	0.635	0.3175	10.2	1	d	0.254
2	287	563	226	0	0	10.2333	1	d	0.127
2	288	562	226	0.635	0.3175	10.2667	1	d	0.127
2	289	562	226	0	0	10.3	1	d	0.0635
2	290	562	226	0	0	10.3333	1	d	0.0635
2	291	562	226	0	0	10.3667	1	d	-1.11e-17
2	292	562	226	0	0	10.4	1	d	0.0635
2	293	562	226	0	0	10.4333	1	d	0.0635
2	294	562	227	0.635	0.3175	10.4667	1	d	0.0635
2	295	562	227	0	0	10.5	1	d	0.1905
2	296	562	227	0	0	10.5333	1	d	0.2803
2	297	562	229	1.27	0.635	10.5667	1	d	0.2168
2	298	563	230	0.898	0.449	10.6	1	d	0.2803
2	299	563	230	0	0	10.6333	1	d	0.3438
2	300	564	230	0.635	0.3175	10.6667	1	d	0.2168
2	301	565	230	0.635	0.3175	10.7	1	d	0.254
2	302	565	230	0	0	10.7333	1	d	0.254
2	303	565	232	1.27	0.635	10.7667	1	d	0.1905
2	304	565	232	0	0	10.8	1	d	0.254
2	305	565	232	0	0	10.8333	1	d	0.254
2	306	565	234	1.27	0.635	10.8667	1	d	0.127
2	307	565	234	0	0	10.9	1	d	0.127
2	308	565	234	0	0	10.9333	1	d	0.127
2	309	565	234	0	0	10.9667	1	d	NA
2	310	565	234	0	0	11	1	d	NA
3	10	671	885	-1	-0.5	1	1	nd	NA
3	11	671	884	0.635	0.3175	1.03333	1	nd	NA
3	12	672	883	0.898	0.449	1.06667	1	nd	0.1168
3	13	671	883	0.635	0.3175	1.1	1	nd	0.5588
3	14	671	883	0	0	1.13333	1	nd	0.4953
3	15	673	888	3.42	1.71	1.16667	1	nd	0.469
3	16	673	888	0	0	1.2	1	nd	0.469
3	17	674	888	0.635	0.3175	1.23333	1	nd	0.469
3	18	675	888	0.635	0.3175	1.26667	1	nd	0.1905
3	19	675	888	0	0	1.3	1	nd	0.1905
3	20	676	888	0.635	0.3175	1.33333	1	nd	0.127
3	21	676	888	0	0	1.36667	1	nd	0.0635
3	22	676	888	0	0	1.4	1	nd	0.127
3	23	676	888	0	0	1.43333	1	nd	0.0635
3	24	676	887	0.635	0.3175	1.46667	1	nd	0.127
3	25	676	887	0	0	1.5	1	nd	0.127
3	26	676	886	0.635	0.3175	1.53333	1	nd	0.1905
3	27	676	886	0	0	1.56667	1	nd	0.1905
3	28	676	885	0.635	0.3175	1.6	1	nd	0.254
3	29	676	884	0.635	0.3175	1.63333	1	nd	0.254
3	30	676	885	0.635	0.3175	1.66667	1	nd	0.3175
3	31	676	884	0.635	0.3175	1.7	1	nd	0.3438
3	32	676	885	0.635	0.3175	1.73333	1	nd	0.4073
3	33	677	884	0.898	0.449	1.76667	1	nd	0.5446
3	34	679	884	1.27	0.635	1.8	1	nd	0.5446
3	35	682	885	2.008	1.004	1.83333	1	nd	0.5446
3	36	682	886	0.635	0.3175	1.86667	1	nd	0.5818
3	37	683	886	0.635	0.3175	1.9	1	nd	0.5183
3	38	685	886	1.27	0.635	1.93333	1	nd	0.3175
3	39	686	886	0.635	0.3175	1.96667	1	nd	0.254
3	40	686	886	0	0	2	1	nd	0.3325
3	41	686	886	0	0	2.03333	1	nd	0.2055
3	42	685	884	1.42	0.71	2.06667	1	nd	0.2055
3	43	685	884	0	0	2.1	1	nd	0.2055
3	44	685	883	0.635	0.3175	2.13333	1	nd	0.2055
3	45	685	883	0	0	2.16667	1	nd	0.127
3	46	685	883	0	0	2.2	1	nd	0.1905
3	47	685	884	0.635	0.3175	2.23333	1	nd	0.127
3	48	684	884	0.635	0.3175	2.26667	1	nd	0.2168
3	49	684	884	0	0	2.3	1	nd	0.2803
3	50	683	885	0.898	0.449	2.33333	1	nd	0.3438
3	51	683	886	0.635	0.3175	2.36667	1	nd	0.3438
3	52	685	886	1.27	0.635	2.4	1	nd	0.4073
3	53	686	886	0.635	0.3175	2.43333	1	nd	0.381
3	54	687	886	0.635	0.3175	2.46667	1	nd	0.4073
3	55	686	886	0.635	0.3175	2.5	1	nd	0.3438
3	56	685	885	0.898	0.449	2.53333	1	nd	0.2803
3	57	684	885	0.635	0.3175	2.56667	1	nd	0.2168
3	58	684	885	0	0	2.6	1	nd	0.2168
3	59	684	885	0	0	2.63333	1	nd	0.127
3	60	683	885	0.635	0.3175	2.66667	1	nd	0.0635
3	61	683	885	0	0	2.7	1	nd	0.127
3	62	683	885	0	0	2.73333	1	nd	0.127
3	63	682	885	0.635	0.3175	2.76667	1	nd	0.127
3	64	682	885	0	0	2.8	1	nd	0.127
3	65	681	885	0.635	0.3175	2.83333	1	nd	0.127
3	66	681	885	0	0	2.86667	1	nd	0.0635
3	67	681	885	0	0	2.9	1	nd	0.0635
3	68	681	885	0	0	2.93333	1	nd	-1.11e-17
3	69	681	885	0	0	2.96667	1	nd	-1.11e-17
3	70	681	885	0	0	3	1	nd	-1.11e-17
3	71	681	885	0	0	3.03333	1	nd	0.0635
3	72	681	885	0	0	3.06667	1	nd	0.1905
3	73	680	885	0.635	0.3175	3.1	1	nd	0.254
3	74	680	883	1.27	0.635	3.13333	1	nd	0.4548
3	75	680	882	0.635	0.3175	3.16667	1	nd	0.6344
3	76	679	879	2.008	1.004	3.2	1	nd	0.9775
3	77	677	877	1.796	0.898	3.23333	1	nd	0.914
3	78	673	872	4.066	2.033	3.26667	1	nd	1.0513
3	79	673	873	0.635	0.3175	3.3	1	nd	1.0513
3	80	672	870	2.008	1.004	3.33333	1	nd	1.1892
3	81	673	867	2.008	1.004	3.36667	1	nd	0.9622
3	82	670	863	3.175	1.5875	3.4	1	nd	1.0407
3	83	668	861	1.796	0.898	3.43333	1	nd	0.9297
3	84	667	859	1.42	0.71	3.46667	1	nd	0.8709
3	85	668	858	0.898	0.449	3.5	1	nd	1.0024
3	86	669	860	1.42	0.71	3.53333	1	nd	1.0024
3	87	664	855	4.49	2.245	3.56667	1	nd	0.9239
3	88	662	853	1.796	0.898	3.6	1	nd	1.9136
3	89	662	852	0.635	0.3175	3.63333	1	nd	1.9136
3	90	662	835	10.795	5.3975	3.66667	1	nd	1.8349
3	91	661	833	1.42	0.71	3.7	1	nd	1.8458
3	92	666	830	3.703	1.8515	3.73333	1	nd	2.0363
3	93	666	827	1.905	0.9525	3.76667	1	nd	1.0838
3	94	666	823	2.54	1.27	3.8	1	nd	1.0053
3	95	666	821	1.27	0.635	3.83333	1	nd	0.6985
3	96	666	820	0.635	0.3175	3.86667	1	nd	0.9703
3	97	666	819	0.635	0.3175	3.9	1	nd	1.1179
3	98	659	817	4.623	2.3115	3.93333	1	nd	1.1329
3	99	653	815	4.016	2.008	3.96667	1	nd	1.4504
3	100	651	814	1.42	0.71	4	1	nd	1.6409
3	101	651	808	3.81	1.905	4.03333	1	nd	1.6276
3	102	651	804	2.54	1.27	4.06667	1	nd	1.6123
3	103	652	797	4.49	2.245	4.1	1	nd	1.6993
3	104	653	791	3.863	1.9315	4.13333	1	nd	1.3818
3	105	656	789	2.29	1.145	4.16667	1	nd	1.1913
3	106	657	789	0.635	0.3175	4.2	1	nd	0.8058
3	107	658	789	0.635	0.3175	4.23333	1	nd	0.5615
3	108	659	789	0.635	0.3175	4.26667	1	nd	0.4595
3	109	660	787	1.42	0.71	4.3	1	nd	0.396
3	110	660	785	1.27	0.635	4.33333	1	nd	0.396
3	111	660	785	0	0	4.36667	1	nd	0.4595
3	112	660	784	0.635	0.3175	4.4	1	nd	0.381
3	113	660	782	1.27	0.635	4.43333	1	nd	0.254
3	114	661	782	0.635	0.3175	4.46667	1	nd	0.3175
3	115	661	782	0	0	4.5	1	nd	0.4445
3	116	661	783	0.635	0.3175	4.53333	1	nd	0.4595
3	117	664	783	1.905	0.9525	4.56667	1	nd	0.538
3	118	665	781	1.42	0.71	4.6	1	nd	0.8618
3	119	666	779	1.42	0.71	4.63333	1	nd	0.9991
3	120	665	774	3.238	1.619	4.66667	1	nd	1.0626
3	121	664	771	2.008	1.004	4.7	1	nd	1.1111
3	122	664	767	2.54	1.27	4.73333	1	nd	1.2531
3	123	664	764	1.905	0.9525	4.76667	1	nd	1.0191
3	124	666	760	2.84	1.42	4.8	1	nd	0.8183
3	125	667	759	0.898	0.449	4.83333	1	nd	0.6541
3	126	667	759	0	0	4.86667	1	nd	0.5534
3	127	668	758	0.898	0.449	4.9	1	nd	0.3592
3	128	669	757	0.898	0.449	4.93333	1	nd	0.3329
3	129	668	756	0.898	0.449	4.96667	1	nd	0.6749
3	130	668	755	0.635	0.3175	5	1	nd	0.5851
3	131	663	753	3.42	1.71	5.03333	1	nd	0.7493
3	132	663	753	0	0	5.06667	1	nd	0.7493
3	133	663	749	2.54	1.27	5.1	1	nd	0.7493
3	134	662	748	0.898	0.449	5.13333	1	nd	0.4708
3	135	661	748	0.635	0.3175	5.16667	1	nd	0.5343
3	136	660	748	0.635	0.3175	5.2	1	nd	0.2803
3	137	660	747	0.635	0.3175	5.23333	1	nd	0.1905
3	138	660	747	0	0	5.26667	1	nd	0.127
3	139	660	747	0	0	5.3	1	nd	0.0635
3	140	660	747	0	0	5.33333	1	nd	0
3	141	660	747	0	0	5.36667	1	nd	0
3	142	660	747	0	0	5.4	1	nd	0
3	143	660	747	0	0	5.43333	1	nd	0
3	144	660	747	0	0	5.46667	1	nd	0.0635
3	145	660	747	0	0	5.5	1	nd	0.0635
3	146	661	747	0.635	0.3175	5.53333	1	nd	0.127
3	147	661	747	0	0	5.56667	1	nd	0.127
3	148	662	747	0.635	0.3175	5.6	1	nd	0.127
3	149	662	747	0	0	5.63333	1	nd	0.0635
3	150	662	747	0	0	5.66667	1	nd	0.2055
3	151	662	747	0	0	5.7	1	nd	0.2055
3	152	664	748	1.42	0.71	5.73333	1	nd	0.2055
3	153	664	747	0.635	0.3175	5.76667	1	nd	0.2055
3	154	664	747	0	0	5.8	1	nd	0.2055
3	155	664	747	0	0	5.83333	1	nd	0.1533
3	156	664	747	0	0	5.86667	1	nd	0.1533
3	157	665	746	0.898	0.449	5.9	1	nd	0.1533
3	158	666	746	0.635	0.3175	5.93333	1	nd	0.2803
3	159	666	746	0	0	5.96667	1	nd	0.3438
3	160	666	748	1.27	0.635	6	1	nd	0.3438
3	161	666	749	0.635	0.3175	6.03333	1	nd	0.3438
3	162	665	750	0.898	0.449	6.06667	1	nd	0.4073
3	163	664	750	0.635	0.3175	6.1	1	nd	0.2803
3	164	664	751	0.635	0.3175	6.13333	1	nd	0.2168
3	165	664	751	0	0	6.16667	1	nd	0.127
3	166	664	751	0	0	6.2	1	nd	0.0635
3	167	664	751	0	0	6.23333	1	nd	0
3	168	664	751	0	0	6.26667	1	nd	0
3	169	664	751	0	0	6.3	1	nd	0
3	170	664	751	0	0	6.33333	1	nd	0
3	171	664	751	0	0	6.36667	1	nd	0.0635
3	172	664	751	0	0	6.4	1	nd	0.0635
3	173	663	751	0.635	0.3175	6.43333	1	nd	0.4701
3	174	663	751	0	0	6.46667	1	nd	0.4701
3	175	668	755	4.066	2.033	6.5	1	nd	0.4701
3	176	668	755	0	0	6.53333	1	nd	0.4066
3	177	668	755	0	0	6.56667	1	nd	0.4066
3	178	668	755	0	0	6.6	1	nd	0
3	179	668	755	0	0	6.63333	1	nd	0.0898
3	180	668	755	0	0	6.66667	1	nd	0.0898
3	181	667	754	0.898	0.449	6.7	1	nd	0.1796
3	182	667	754	0	0	6.73333	1	nd	0.1796
3	183	666	753	0.898	0.449	6.76667	1	nd	0.1796
3	184	666	753	0	0	6.8	1	nd	0.0898
3	185	666	753	0	0	6.83333	1	nd	0.1533
3	186	666	753	0	0	6.86667	1	nd	0.0635
3	187	666	752	0.635	0.3175	6.9	1	nd	0.0635
3	188	666	752	0	0	6.93333	1	nd	0.0635
3	189	666	752	0	0	6.96667	1	nd	0.0635
3	190	666	752	0	0	7	1	nd	0
3	191	666	752	0	0	7.03333	1	nd	0
3	192	666	752	0	0	7.06667	1	nd	0
3	193	666	752	0	0	7.1	1	nd	0.127
3	194	666	752	0	0	7.13333	1	nd	0.1905
3	195	666	750	1.27	0.635	7.16667	1	nd	0.254
3	196	666	749	0.635	0.3175	7.2	1	nd	0.3175
3	197	666	748	0.635	0.3175	7.23333	1	nd	0.4445
3	198	666	749	0.635	0.3175	7.26667	1	nd	0.4445
3	199	668	749	1.27	0.635	7.3	1	nd	0.381
3	200	668	747	1.27	0.635	7.33333	1	nd	0.3175
3	201	668	747	0	0	7.36667	1	nd	0.3175
3	202	668	747	0	0	7.4	1	nd	0.2803
3	203	669	747	0.635	0.3175	7.43333	1	nd	0.1533
3	204	670	746	0.898	0.449	7.46667	1	nd	0.1533
3	205	670	746	0	0	7.5	1	nd	0.1533
3	206	670	746	0	0	7.53333	1	nd	0.1533
3	207	670	746	0	0	7.56667	1	nd	0.0635
3	208	671	746	0.635	0.3175	7.6	1	nd	0.2055
3	209	671	746	0	0	7.63333	1	nd	0.269
3	210	673	745	1.42	0.71	7.66667	1	nd	0.3588
3	211	673	744	0.635	0.3175	7.7	1	nd	0.4373
3	212	674	743	0.898	0.449	7.73333	1	nd	0.4373
3	213	676	742	1.42	0.71	7.76667	1	nd	0.4223
3	214	676	742	0	0	7.8	1	nd	0.3588
3	215	676	744	1.27	0.635	7.83333	1	nd	0.269
3	216	676	744	0	0	7.86667	1	nd	0.254
3	217	676	744	0	0	7.9	1	nd	0.254
3	218	676	746	1.27	0.635	7.93333	1	nd	0.127
3	219	676	746	0	0	7.96667	1	nd	0.127
3	220	676	746	0	0	8	1	nd	0.2168
3	221	676	746	0	0	8.03333	1	nd	0.2318
3	222	677	745	0.898	0.449	8.06667	1	nd	0.3588
3	223	678	743	1.42	0.71	8.1	1	nd	0.3588
3	224	680	743	1.27	0.635	8.13333	1	nd	0.3588
3	225	680	743	0	0	8.16667	1	nd	0.269
3	226	680	743	0	0	8.2	1	nd	0.127
3	227	680	743	0	0	8.23333	1	nd	0.2618
3	228	680	743	0	0	8.26667	1	nd	0.2618
3	229	684	744	2.618	1.309	8.3	1	nd	0.3516
3	230	684	744	0	0	8.33333	1	nd	0.4936
3	231	685	743	0.898	0.449	8.36667	1	nd	0.5571
3	232	687	742	1.42	0.71	8.4	1	nd	0.2953
3	233	687	741	0.635	0.3175	8.43333	1	nd	0.4223
3	234	687	741	0	0	8.46667	1	nd	0.396
3	235	687	739	1.27	0.635	8.5	1	nd	0.254
3	236	686	739	0.635	0.3175	8.53333	1	nd	0.1905
3	237	686	739	0	0	8.56667	1	nd	0.254
3	238	686	739	0	0	8.6	1	nd	0.1905
3	239	687	739	0.635	0.3175	8.63333	1	nd	0.127
3	240	687	738	0.635	0.3175	8.66667	1	nd	0.127
3	241	687	738	0	0	8.7	1	nd	0.2168
3	242	687	738	0	0	8.73333	1	nd	0.1533
3	243	688	739	0.898	0.449	8.76667	1	nd	0.0898
3	244	688	739	0	0	8.8	1	nd	0.0898
3	245	688	739	0	0	8.83333	1	nd	0.0898
3	246	688	739	0	0	8.86667	1	nd	0
3	247	688	739	0	0	8.9	1	nd	0.0635
3	248	688	739	0	0	8.93333	1	nd	0.0635
3	249	688	740	0.635	0.3175	8.96667	1	nd	0.0635
3	250	688	740	0	0	9	1	nd	0.127
3	251	688	740	0	0	9.03333	1	nd	0.127
3	252	688	741	0.635	0.3175	9.06667	1	nd	0.127
3	253	688	741	0	0	9.1	1	nd	0.127
3	254	688	742	0.635	0.3175	9.13333	1	nd	0.127
3	255	688	742	0	0	9.16667	1	nd	0.0635
3	256	688	742	0	0	9.2	1	nd	0.2431
3	257	688	742	0	0	9.23333	1	nd	0.1796
3	258	690	744	1.796	0.898	9.26667	1	nd	0.1796
3	259	690	744	0	0	9.3	1	nd	0.2431
3	260	690	744	0	0	9.33333	1	nd	0.3066
3	261	691	744	0.635	0.3175	9.36667	1	nd	0.127
3	262	692	744	0.635	0.3175	9.4	1	nd	0.127
3	263	692	744	0	0	9.43333	1	nd	0.1905
3	264	692	744	0	0	9.46667	1	nd	0.269
3	265	692	743	0.635	0.3175	9.5	1	nd	0.2055
3	266	694	742	1.42	0.71	9.53333	1	nd	0.2055
3	267	694	742	0	0	9.56667	1	nd	0.2055
3	268	694	742	0	0	9.6	1	nd	0.2055
3	269	694	742	0	0	9.63333	1	nd	0.0635
3	270	694	741	0.635	0.3175	9.66667	1	nd	0.127
3	271	694	741	0	0	9.7	1	nd	0.127
3	272	693	741	0.635	0.3175	9.73333	1	nd	0.2168
3	273	693	741	0	0	9.76667	1	nd	0.2431
3	274	694	740	0.898	0.449	9.8	1	nd	0.2431
3	275	693	739	0.898	0.449	9.83333	1	nd	0.2694
3	276	693	739	0	0	9.86667	1	nd	0.2694
3	277	694	740	0.898	0.449	9.9	1	nd	0.2431
3	278	694	740	0	0	9.93333	1	nd	0.1533
3	279	694	739	0.635	0.3175	9.96667	1	nd	0.1533
3	280	694	739	0	0	10	1	nd	0.0635
3	281	694	739	0	0	10.0333	1	nd	0.0635
3	282	694	739	0	0	10.0667	1	nd	0
3	283	694	739	0	0	10.1	1	nd	0.0898
3	284	694	739	0	0	10.1333	1	nd	0.0898
3	285	695	740	0.898	0.449	10.1667	1	nd	0.0898
3	286	695	740	0	0	10.2	1	nd	0.0898
3	287	695	740	0	0	10.2333	1	nd	0.3188
3	288	695	740	0	0	10.2667	1	nd	0.229
3	289	693	743	2.29	1.145	10.3	1	nd	0.229
3	290	693	743	0	0	10.3333	1	nd	0.229
3	291	693	743	0	0	10.3667	1	nd	0.229
3	292	693	743	0	0	10.4	1	nd	0
3	293	693	743	0	0	10.4333	1	nd	0.142
3	294	693	743	0	0	10.4667	1	nd	0.142
3	295	692	745	1.42	0.71	10.5	1	nd	0.284
3	296	692	745	0	0	10.5333	1	nd	0.3475
3	297	694	744	1.42	0.71	10.5667	1	nd	0.411
3	298	693	744	0.635	0.3175	10.6	1	nd	0.3325
3	299	693	743	0.635	0.3175	10.6333	1	nd	0.3325
3	300	694	743	0.635	0.3175	10.6667	1	nd	0.2803
3	301	694	743	0	0	10.7	1	nd	0.3066
3	302	695	744	0.898	0.449	10.7333	1	nd	0.2431
3	303	694	743	0.898	0.449	10.7667	1	nd	0.1796
3	304	694	743	0	0	10.8	1	nd	0.1796
3	305	694	743	0	0	10.8333	1	nd	0.0898
3	306	694	743	0	0	10.8667	1	nd	0
3	307	694	743	0	0	10.9	1	nd	0.127
3	308	694	743	0	0	10.9333	1	nd	0.127
3	309	694	741	1.27	0.635	10.9667	1	nd	NA
3	310	694	741	0	0	11	1	nd	NA
4	10	282	853	-1	-0.5	1	1	nd	NA
4	11	285	857	3.175	1.5875	1.03333	1	nd	NA
4	12	285	857	0	0	1.06667	1	nd	0.4715
4	13	285	861	2.54	1.27	1.1	1	nd	0.6985
4	14	285	861	0	0	1.13333	1	nd	0.4445
4	15	285	859	1.27	0.635	1.16667	1	nd	0.4445
4	16	285	858	0.635	0.3175	1.2	1	nd	0.254
4	17	285	858	0	0	1.23333	1	nd	0.254
4	18	285	857	0.635	0.3175	1.26667	1	nd	0.3888
4	19	285	857	0	0	1.3	1	nd	0.3253
4	20	281	858	2.618	1.309	1.33333	1	nd	0.5261
4	21	281	858	0	0	1.36667	1	nd	0.4626
4	22	284	859	2.008	1.004	1.4	1	nd	0.6422
4	23	284	859	0	0	1.43333	1	nd	0.6094
4	24	282	857	1.796	0.898	1.46667	1	nd	0.8384
4	25	284	854	2.29	1.145	1.5	1	nd	0.6376
4	26	282	851	2.29	1.145	1.53333	1	nd	0.6376
4	27	282	851	0	0	1.56667	1	nd	0.6
4	28	282	851	0	0	1.6	1	nd	0.371
4	29	280	850	1.42	0.71	1.63333	1	nd	0.269
4	30	280	850	0	0	1.66667	1	nd	0.269
4	31	278	850	1.27	0.635	1.7	1	nd	0.269
4	32	278	850	0	0	1.73333	1	nd	0.1905
4	33	278	850	0	0	1.76667	1	nd	0.1905
4	34	278	849	0.635	0.3175	1.8	1	nd	0.1905
4	35	278	849	0	0	1.83333	1	nd	0.1905
4	36	278	847	1.27	0.635	1.86667	1	nd	0.4745
4	37	278	847	0	0	1.9	1	nd	0.553
4	38	280	851	2.84	1.42	1.93333	1	nd	0.782
4	39	281	853	1.42	0.71	1.96667	1	nd	0.655
4	40	284	855	2.29	1.145	2	1	nd	0.797
4	41	284	855	0	0	2.03333	1	nd	0.513
4	42	285	857	1.42	0.71	2.06667	1	nd	0.371
4	43	285	857	0	0	2.1	1	nd	0.284
4	44	285	857	0	0	2.13333	1	nd	0.284
4	45	286	855	1.42	0.71	2.16667	1	nd	0.142
4	46	286	855	0	0	2.2	1	nd	0.269
4	47	286	855	0	0	2.23333	1	nd	0.269
4	48	286	857	1.27	0.635	2.26667	1	nd	0.127
4	49	286	857	0	0	2.3	1	nd	0.127
4	50	286	857	0	0	2.33333	1	nd	0.1905
4	51	286	857	0	0	2.36667	1	nd	0.0635
4	52	286	858	0.635	0.3175	2.4	1	nd	0.2643
4	53	286	858	0	0	2.43333	1	nd	0.2643
4	54	289	859	2.008	1.004	2.46667	1	nd	0.2643
4	55	289	859	0	0	2.5	1	nd	0.2008
4	56	289	859	0	0	2.53333	1	nd	0.2008
4	57	289	859	0	0	2.56667	1	nd	-2.22e-17
4	58	289	859	0	0	2.6	1	nd	-2.22e-17
4	59	289	859	0	0	2.63333	1	nd	-2.22e-17
4	60	289	859	0	0	2.66667	1	nd	-2.22e-17
4	61	289	859	0	0	2.7	1	nd	-2.22e-17
4	62	289	859	0	0	2.73333	1	nd	-2.22e-17
4	63	289	859	0	0	2.76667	1	nd	-2.22e-17
4	64	289	859	0	0	2.8	1	nd	0.1905
4	65	289	859	0	0	2.83333	1	nd	0.1905
4	66	292	859	1.905	0.9525	2.86667	1	nd	0.1905
4	67	292	859	0	0	2.9	1	nd	0.254
4	68	292	859	0	0	2.93333	1	nd	0.254
4	69	292	858	0.635	0.3175	2.96667	1	nd	0.127
4	70	292	858	0	0	3	1	nd	0.127
4	71	293	858	0.635	0.3175	3.03333	1	nd	0.127
4	72	293	858	0	0	3.06667	1	nd	0.0635
4	73	293	858	0	0	3.1	1	nd	0.0635
4	74	293	858	0	0	3.13333	1	nd	-2.22e-17
4	75	293	858	0	0	3.16667	1	nd	0.0635
4	76	293	858	0	0	3.2	1	nd	0.0635
4	77	292	858	0.635	0.3175	3.23333	1	nd	0.127
4	78	292	858	0	0	3.26667	1	nd	0.127
4	79	292	857	0.635	0.3175	3.3	1	nd	0.127
4	80	292	857	0	0	3.33333	1	nd	0.1905
4	81	292	857	0	0	3.36667	1	nd	0.1905
4	82	290	857	1.27	0.635	3.4	1	nd	0.127
4	83	290	857	0	0	3.43333	1	nd	0.127
4	84	290	857	0	0	3.46667	1	nd	0.5849
4	85	290	857	0	0	3.5	1	nd	0.5849
4	86	286	863	4.579	2.2895	3.53333	1	nd	0.7119
4	87	286	865	1.27	0.635	3.56667	1	nd	0.8389
4	88	286	867	1.27	0.635	3.6	1	nd	0.9659
4	89	286	869	1.27	0.635	3.63333	1	nd	0.6985
4	90	286	871	1.27	0.635	3.66667	1	nd	0.8005
4	91	286	874	1.905	0.9525	3.7	1	nd	0.6735
4	92	288	877	2.29	1.145	3.73333	1	nd	2.1174
4	93	288	877	0	0	3.76667	1	nd	2.8884
4	94	312	871	15.709	7.8545	3.8	1	nd	3.2729
4	95	326	869	8.98	4.49	3.83333	1	nd	3.5901
4	96	317	870	5.75	2.875	3.86667	1	nd	4.8033
4	97	324	875	5.462	2.731	3.9	1	nd	3.4864
4	98	326	894	12.132	6.066	3.93333	1	nd	2.7892
4	99	330	894	2.54	1.27	3.96667	1	nd	2.5317
4	100	333	895	2.008	1.004	4	1	nd	2.176
4	101	338	895	3.175	1.5875	4.03333	1	nd	1.0898
4	102	338	898	1.905	0.9525	4.06667	1	nd	1.2424
4	103	340	898	1.27	0.635	4.1	1	nd	1.4482
4	104	345	894	4.066	2.033	4.13333	1	nd	1.3315
4	105	350	890	4.066	2.033	4.16667	1	nd	1.283
4	106	353	889	2.008	1.004	4.2	1	nd	1.4735
4	107	354	887	1.42	0.71	4.23333	1	nd	1.1939
4	108	357	891	3.175	1.5875	4.26667	1	nd	0.8508
4	109	357	893	1.27	0.635	4.3	1	nd	0.879
4	110	358	893	0.635	0.3175	4.33333	1	nd	1.8818
4	111	361	895	2.29	1.145	4.36667	1	nd	1.9235
4	112	378	901	11.448	5.724	4.4	1	nd	1.9235
4	113	382	905	3.592	1.796	4.43333	1	nd	1.86
4	114	380	905	1.27	0.635	4.46667	1	nd	1.773
4	115	380	905	0	0	4.5	1	nd	0.8187
4	116	382	906	1.42	0.71	4.53333	1	nd	0.6015
4	117	382	909	1.905	0.9525	4.56667	1	nd	0.6753
4	118	384	910	1.42	0.71	4.6	1	nd	1.1376
4	119	385	913	2.008	1.004	4.63333	1	nd	1.5947
4	120	392	911	4.623	2.3115	4.66667	1	nd	1.4042
4	121	400	906	5.991	2.9955	4.7	1	nd	1.524
4	122	400	906	0	0	4.73333	1	nd	1.6935
4	123	404	907	2.618	1.309	4.76667	1	nd	1.4217
4	124	409	910	3.703	1.8515	4.8	1	nd	0.9124
4	125	409	913	1.905	0.9525	4.83333	1	nd	1.0544
4	126	410	914	0.898	0.449	4.86667	1	nd	0.7926
4	127	412	915	1.42	0.71	4.9	1	nd	0.4223
4	128	412	915	0	0	4.93333	1	nd	0.3216
4	129	412	915	0	0	4.96667	1	nd	0.3216
4	130	413	914	0.898	0.449	5	1	nd	0.4336
4	131	414	913	0.898	0.449	5.03333	1	nd	0.5606
4	132	414	909	2.54	1.27	5.06667	1	nd	0.7511
4	133	414	907	1.27	0.635	5.1	1	nd	0.7883
4	134	414	910	1.905	0.9525	5.13333	1	nd	0.9603
4	135	416	910	1.27	0.635	5.16667	1	nd	0.7961
4	136	417	914	2.618	1.309	5.2	1	nd	0.8981
4	137	418	915	0.898	0.449	5.23333	1	nd	0.7076
4	138	420	918	2.29	1.145	5.26667	1	nd	0.7814
4	139	420	918	0	0	5.3	1	nd	0.9262
4	140	421	921	2.008	1.004	5.33333	1	nd	1.243
4	141	425	926	4.066	2.033	5.36667	1	nd	1.2758
4	142	430	930	4.066	2.033	5.4	1	nd	1.6568
4	143	434	931	2.618	1.309	5.43333	1	nd	1.598
4	144	440	931	3.81	1.905	5.46667	1	nd	1.3334
4	145	438	930	1.42	0.71	5.5	1	nd	1.1886
4	146	440	929	1.42	0.71	5.53333	1	nd	1.286
4	147	441	925	2.618	1.309	5.56667	1	nd	1.047
4	148	445	921	3.592	1.796	5.6	1	nd	1.2225
4	149	446	919	1.42	0.71	5.63333	1	nd	1.5065
4	150	449	915	3.175	1.5875	5.66667	1	nd	1.3717
4	151	452	921	4.26	2.13	5.7	1	nd	1.1395
4	152	454	921	1.27	0.635	5.73333	1	nd	1.1245
4	153	456	921	1.27	0.635	5.76667	1	nd	0.949
4	154	456	919	1.27	0.635	5.8	1	nd	1.035
4	155	457	917	1.42	0.71	5.83333	1	nd	1.2672
4	156	461	910	5.12	2.56	5.86667	1	nd	2.0247
4	157	465	906	3.592	1.796	5.9	1	nd	2.1267
4	158	478	901	8.845	4.4225	5.93333	1	nd	2.1752
4	159	481	899	2.29	1.145	5.96667	1	nd	2.3014
4	160	484	899	1.905	0.9525	6	1	nd	2.4258
4	161	494	898	6.382	3.191	6.03333	1	nd	2.1404
4	162	501	895	4.836	2.418	6.06667	1	nd	1.9114
4	163	509	890	5.991	2.9955	6.1	1	nd	1.7209
4	164	509	890	0	0	6.13333	1	nd	1.0827
4	165	509	890	0	0	6.16667	1	nd	0.6889
4	166	509	890	0	0	6.2	1	nd	0.2168
4	167	510	889	0.898	0.449	6.23333	1	nd	0.3438
4	168	512	889	1.27	0.635	6.26667	1	nd	0.4073
4	169	512	887	1.27	0.635	6.3	1	nd	0.8139
4	170	513	887	0.635	0.3175	6.33333	1	nd	0.7876
4	171	508	891	4.066	2.033	6.36667	1	nd	0.8026
4	172	508	890	0.635	0.3175	6.4	1	nd	0.8026
4	173	510	889	1.42	0.71	6.43333	1	nd	0.8811
4	174	512	889	1.27	0.635	6.46667	1	nd	0.538
4	175	513	887	1.42	0.71	6.5	1	nd	0.8448
4	176	513	886	0.635	0.3175	6.53333	1	nd	1.2882
4	177	518	889	3.703	1.8515	6.56667	1	nd	1.251
4	178	525	883	5.854	2.927	6.6	1	nd	2.2324
4	179	526	882	0.898	0.449	6.63333	1	nd	2.1689
4	180	514	895	11.234	5.617	6.66667	1	nd	1.9256
4	181	514	895	0	0	6.7	1	nd	1.3402
4	182	514	897	1.27	0.635	6.73333	1	nd	1.2504
4	183	514	897	0	0	6.76667	1	nd	0.127
4	184	514	897	0	0	6.8	1	nd	0.4508
4	185	514	897	0	0	6.83333	1	nd	0.5932
4	186	513	902	3.238	1.619	6.86667	1	nd	0.6567
4	187	510	905	2.694	1.347	6.9	1	nd	0.9185
4	188	509	905	0.635	0.3175	6.93333	1	nd	0.9185
4	189	508	909	2.618	1.309	6.96667	1	nd	0.9367
4	190	508	909	0	0	7	1	nd	0.6673
4	191	506	914	3.42	1.71	7.03333	1	nd	1.1158
4	192	506	914	0	0	7.06667	1	nd	0.9175
4	193	502	921	5.12	2.56	7.1	1	nd	1.0595
4	194	502	922	0.635	0.3175	7.13333	1	nd	0.908
4	195	500	923	1.42	0.71	7.16667	1	nd	1.0985
4	196	497	923	1.905	0.9525	7.2	1	nd	0.65
4	197	494	923	1.905	0.9525	7.23333	1	nd	0.7873
4	198	494	922	0.635	0.3175	7.26667	1	nd	0.7088
4	199	493	919	2.008	1.004	7.3	1	nd	0.5818
4	200	493	918	0.635	0.3175	7.33333	1	nd	0.5818
4	201	492	918	0.635	0.3175	7.36667	1	nd	0.5818
4	202	492	915	1.905	0.9525	7.4	1	nd	0.665
4	203	492	914	0.635	0.3175	7.43333	1	nd	0.8555
4	204	494	910	2.84	1.42	7.46667	1	nd	0.8818
4	205	494	906	2.54	1.27	7.5	1	nd	1.0776
4	206	493	905	0.898	0.449	7.53333	1	nd	1.1039
4	207	494	899	3.863	1.9315	7.56667	1	nd	1.0739
4	208	493	898	0.898	0.449	7.6	1	nd	0.8199
4	209	493	894	2.54	1.27	7.63333	1	nd	0.8199
4	210	493	894	0	0	7.66667	1	nd	0.4336
4	211	494	893	0.898	0.449	7.7	1	nd	0.5446
4	212	494	893	0	0	7.73333	1	nd	0.3541
4	213	497	894	2.008	1.004	7.76667	1	nd	0.3541
4	214	497	893	0.635	0.3175	7.8	1	nd	0.3913
4	215	497	893	0	0	7.83333	1	nd	0.3913
4	216	497	891	1.27	0.635	7.86667	1	nd	0.1905
4	217	497	891	0	0	7.9	1	nd	0.508
4	218	497	891	0	0	7.93333	1	nd	0.508
4	219	497	897	3.81	1.905	7.96667	1	nd	0.6428
4	220	497	897	0	0	8	1	nd	0.6428
4	221	501	898	2.618	1.309	8.03333	1	nd	0.7063
4	222	501	898	0	0	8.06667	1	nd	0.5793
4	223	501	897	0.635	0.3175	8.1	1	nd	0.5793
4	224	497	897	2.54	1.27	8.13333	1	nd	1.4884
4	225	497	897	0	0	8.16667	1	nd	1.4884
4	226	485	883	11.709	5.8545	8.2	1	nd	1.5147
4	227	485	883	0	0	8.23333	1	nd	1.3242
4	228	484	882	0.898	0.449	8.26667	1	nd	1.5038
4	229	484	881	0.635	0.3175	8.3	1	nd	0.3964
4	230	482	879	1.796	0.898	8.33333	1	nd	0.4862
4	231	482	878	0.635	0.3175	8.36667	1	nd	0.4599
4	232	481	877	0.898	0.449	8.4	1	nd	0.6804
4	233	482	877	0.635	0.3175	8.43333	1	nd	1.1358
4	234	484	881	2.84	1.42	8.46667	1	nd	1.1993
4	235	484	891	6.35	3.175	8.5	1	nd	1.2365
4	236	484	893	1.27	0.635	8.53333	1	nd	1.173
4	237	484	895	1.27	0.635	8.56667	1	nd	1.016
4	238	484	895	0	0	8.6	1	nd	0.508
4	239	484	897	1.27	0.635	8.63333	1	nd	0.5715
4	240	484	899	1.27	0.635	8.66667	1	nd	0.4445
4	241	484	902	1.905	0.9525	8.7	1	nd	1.3082
4	242	484	902	0	0	8.73333	1	nd	1.1812
4	243	480	889	8.637	4.3185	8.76667	1	nd	1.0542
4	244	480	889	0	0	8.8	1	nd	0.8637
4	245	480	889	0	0	8.83333	1	nd	0.8637
4	246	480	889	0	0	8.86667	1	nd	0.142
4	247	480	889	0	0	8.9	1	nd	0.142
4	248	481	891	1.42	0.71	8.93333	1	nd	0.396
4	249	481	891	0	0	8.96667	1	nd	0.396
4	250	481	895	2.54	1.27	9	1	nd	0.396
4	251	481	895	0	0	9.03333	1	nd	0.538
4	252	481	895	0	0	9.06667	1	nd	0.538
4	253	485	897	2.84	1.42	9.1	1	nd	0.284
4	254	485	897	0	0	9.13333	1	nd	1.5169
4	255	485	897	0	0	9.16667	1	nd	1.5169
4	256	474	881	12.329	6.1645	9.2	1	nd	1.4947
4	257	474	881	0	0	9.23333	1	nd	1.4947
4	258	470	882	2.618	1.309	9.26667	1	nd	1.4947
4	259	470	882	0	0	9.3	1	nd	0.2618
4	260	470	882	0	0	9.33333	1	nd	0.4626
4	261	470	882	0	0	9.36667	1	nd	0.2008
4	262	469	885	2.008	1.004	9.4	1	nd	0.2008
4	263	469	885	0	0	9.43333	1	nd	0.4626
4	264	469	885	0	0	9.46667	1	nd	0.4626
4	265	470	889	2.618	1.309	9.5	1	nd	0.6321
4	266	470	889	0	0	9.53333	1	nd	0.6321
4	267	473	894	3.703	1.8515	9.56667	1	nd	0.6956
4	268	473	894	0	0	9.6	1	nd	0.5608
4	269	473	895	0.635	0.3175	9.63333	1	nd	0.5608
4	270	473	897	1.27	0.635	9.66667	1	nd	0.1905
4	271	473	897	0	0	9.7	1	nd	0.1905
4	272	473	897	0	0	9.73333	1	nd	0.127
4	273	473	897	0	0	9.76667	1	nd	0.127
4	274	473	897	0	0	9.8	1	nd	0.127
4	275	473	899	1.27	0.635	9.83333	1	nd	0.127
4	276	473	899	0	0	9.86667	1	nd	0.127
4	277	473	899	0	0	9.9	1	nd	0.127
4	278	473	899	0	0	9.93333	1	nd	-3.44e-16
4	279	473	899	0	0	9.96667	1	nd	0.0635
4	280	473	899	0	0	10	1	nd	0.8255
4	281	472	899	0.635	0.3175	10.0333	1	nd	0.8255
4	282	484	899	7.62	3.81	10.0667	1	nd	0.8255
4	283	484	899	0	0	10.1	1	nd	0.8255
4	284	484	899	0	0	10.1333	1	nd	0.889
4	285	484	899	0	0	10.1667	1	nd	0.127
4	286	482	899	1.27	0.635	10.2	1	nd	0.127
4	287	482	899	0	0	10.2333	1	nd	0.127
4	288	482	899	0	0	10.2667	1	nd	0.127
4	289	482	899	0	0	10.3	1	nd	0.127
4	290	482	899	0	0	10.3333	1	nd	0.127
4	291	480	899	1.27	0.635	10.3667	1	nd	0.3888
4	292	480	899	0	0	10.4	1	nd	0.3888
4	293	481	903	2.618	1.309	10.4333	1	nd	0.3888
4	294	481	903	0	0	10.4667	1	nd	0.2618
4	295	481	903	0	0	10.5	1	nd	0.3253
4	296	481	903	0	0	10.5333	1	nd	0.127
4	297	481	902	0.635	0.3175	10.5667	1	nd	0.127
4	298	481	901	0.635	0.3175	10.6	1	nd	0.3175
4	299	481	901	0	0	10.6333	1	nd	0.3175
4	300	484	901	1.905	0.9525	10.6667	1	nd	0.254
4	301	484	901	0	0	10.7	1	nd	0.1905
4	302	484	901	0	0	10.7333	1	nd	0.1905
4	303	484	901	0	0	10.7667	1	nd	-3.44e-16
4	304	484	901	0	0	10.8	1	nd	-3.44e-16
4	305	484	901	0	0	10.8333	1	nd	-3.44e-16
4	306	484	901	0	0	10.8667	1	nd	-3.44e-16
4	307	484	901	0	0	10.9	1	nd	0.284
4	308	484	901	0	0	10.9333	1	nd	0.284
4	309	482	897	2.84	1.42	10.9667	1	nd	NA
4	310	482	897	0	0	11	1	nd	NA
5	10	266	827	-1	-0.5	1	1	nd	NA
5	11	265	827	0.635	0.3175	1.03333	1	nd	NA
5	12	268	827	1.905	0.9525	1.06667	1	nd	0.296
5	13	266	826	1.42	0.71	1.1	1	nd	0.396
5	14	266	826	0	0	1.13333	1	nd	0.3325
5	15	266	826	0	0	1.16667	1	nd	0.5283
5	16	266	826	0	0	1.2	1	nd	0.6153
5	17	272	825	3.863	1.9315	1.23333	1	nd	0.9328
5	18	274	822	2.29	1.145	1.26667	1	nd	1.2022
5	19	277	818	3.175	1.5875	1.3	1	nd	1.7447
5	20	280	815	2.694	1.347	1.33333	1	nd	2.0214
5	21	277	823	5.425	2.7125	1.36667	1	nd	2.4674
5	22	280	833	6.63	3.315	1.4	1	nd	2.4117
5	23	288	826	6.75	3.375	1.43333	1	nd	2.2693
5	24	292	825	2.618	1.309	1.46667	1	nd	1.8688
5	25	292	823	1.27	0.635	1.5	1	nd	1.6894
5	26	293	821	1.42	0.71	1.53333	1	nd	1.0144
5	27	300	818	4.836	2.418	1.56667	1	nd	0.7526
5	28	300	818	0	0	1.6	1	nd	0.8796
5	29	300	818	0	0	1.63333	1	nd	0.7376
5	30	300	814	2.54	1.27	1.66667	1	nd	0.762
5	31	300	814	0	0	1.7	1	nd	1.0795
5	32	300	822	5.08	2.54	1.73333	1	nd	1.143
5	33	304	819	3.175	1.5875	1.76667	1	nd	1.1508
5	34	305	819	0.635	0.3175	1.8	1	nd	1.3516
5	35	309	818	2.618	1.309	1.83333	1	nd	0.9856
5	36	312	817	2.008	1.004	1.86667	1	nd	0.8101
5	37	313	815	1.42	0.71	1.9	1	nd	1.3146
5	38	312	813	1.42	0.71	1.93333	1	nd	1.2433
5	39	308	805	5.68	2.84	1.96667	1	nd	1.2965
5	40	308	802	1.905	0.9525	2	1	nd	1.1545
5	41	304	802	2.54	1.27	2.03333	1	nd	1.203
5	42	304	802	0	0	2.06667	1	nd	0.6985
5	43	301	802	1.905	0.9525	2.1	1	nd	0.6985
5	44	300	802	0.635	0.3175	2.13333	1	nd	0.4445
5	45	297	802	1.905	0.9525	2.16667	1	nd	0.8511
5	46	297	802	0	0	2.2	1	nd	0.6606
5	47	292	806	4.066	2.033	2.23333	1	nd	0.5971
5	48	292	806	0	0	2.26667	1	nd	0.4066
5	49	292	806	0	0	2.3	1	nd	0.4701
5	50	292	806	0	0	2.33333	1	nd	0.0635
5	51	292	807	0.635	0.3175	2.36667	1	nd	0.0635
5	52	292	807	0	0	2.4	1	nd	0.381
5	53	292	807	0	0	2.43333	1	nd	0.4445
5	54	288	810	3.175	1.5875	2.46667	1	nd	0.381
5	55	288	809	0.635	0.3175	2.5	1	nd	0.4445
5	56	288	809	0	0	2.53333	1	nd	0.6985
5	57	289	809	0.635	0.3175	2.56667	1	nd	0.381
5	58	293	809	2.54	1.27	2.6	1	nd	0.4445
5	59	293	809	0	0	2.63333	1	nd	0.508
5	60	293	807	1.27	0.635	2.66667	1	nd	0.508
5	61	293	806	0.635	0.3175	2.7	1	nd	0.254
5	62	294	806	0.635	0.3175	2.73333	1	nd	0.254
5	63	294	806	0	0	2.76667	1	nd	0.127
5	64	294	806	0	0	2.8	1	nd	0.2055
5	65	294	806	0	0	2.83333	1	nd	0.142
5	66	292	807	1.42	0.71	2.86667	1	nd	0.142
5	67	292	807	0	0	2.9	1	nd	0.142
5	68	292	807	0	0	2.93333	1	nd	0.371
5	69	292	807	0	0	2.96667	1	nd	0.3188
5	70	290	810	2.29	1.145	3	1	nd	0.3188
5	71	289	809	0.898	0.449	3.03333	1	nd	0.4458
5	72	289	809	0	0	3.06667	1	nd	0.6466
5	73	289	807	1.27	0.635	3.1	1	nd	0.4176
5	74	292	806	2.008	1.004	3.13333	1	nd	0.6453
5	75	292	806	0	0	3.16667	1	nd	0.6453
5	76	292	811	3.175	1.5875	3.2	1	nd	0.7473
5	77	292	811	0	0	3.23333	1	nd	0.61
5	78	289	813	2.29	1.145	3.26667	1	nd	0.7896
5	79	288	813	0.635	0.3175	3.3	1	nd	0.7561
5	80	286	811	1.796	0.898	3.33333	1	nd	0.9357
5	81	282	809	2.84	1.42	3.36667	1	nd	0.9075
5	82	280	807	1.796	0.898	3.4	1	nd	1.6086
5	83	277	806	2.008	1.004	3.43333	1	nd	1.7465
5	84	265	807	7.646	3.823	3.46667	1	nd	1.7243
5	85	261	810	3.175	1.5875	3.5	1	nd	2.1127
5	86	257	811	2.618	1.309	3.53333	1	nd	2.2294
5	87	249	815	5.68	2.84	3.56667	1	nd	1.7823
5	88	245	818	3.175	1.5875	3.6	1	nd	2.749
5	89	240	818	3.175	1.5875	3.63333	1	nd	3.1972
5	90	220	821	12.842	6.421	3.66667	1	nd	2.719
5	91	209	819	7.1	3.55	3.7	1	nd	2.5435
5	92	208	818	0.898	0.449	3.73333	1	nd	2.568
5	93	206	817	1.42	0.71	3.76667	1	nd	1.8588
5	94	201	815	3.42	1.71	3.8	1	nd	1.6568
5	95	192	814	5.75	2.875	3.83333	1	nd	1.6305
5	96	184	814	5.08	2.54	3.86667	1	nd	1.806
5	97	184	813	0.635	0.3175	3.9	1	nd	1.8706
5	98	180	810	3.175	1.5875	3.93333	1	nd	1.5246
5	99	176	805	4.066	2.033	3.96667	1	nd	1.5628
5	100	173	803	2.29	1.145	4	1	nd	2.2093
5	101	166	798	5.462	2.731	4.03333	1	nd	2.1458
5	102	156	793	7.1	3.55	4.06667	1	nd	1.94
5	103	152	793	2.54	1.27	4.1	1	nd	1.711
5	104	149	794	2.008	1.004	4.13333	1	nd	1.7073
5	105	149	794	0	0	4.16667	1	nd	1.5688
5	106	152	786	5.425	2.7125	4.2	1	nd	1.7164
5	107	152	777	5.715	2.8575	4.23333	1	nd	1.6426
5	108	150	771	4.016	2.008	4.26667	1	nd	1.8966
5	109	148	771	1.27	0.635	4.3	1	nd	1.6716
5	110	148	767	2.54	1.27	4.33333	1	nd	2.0159
5	111	148	762	3.175	1.5875	4.36667	1	nd	1.6143
5	112	140	750	9.158	4.579	4.4	1	nd	1.8048
5	113	140	750	0	0	4.43333	1	nd	1.8348
5	114	136	747	3.175	1.5875	4.46667	1	nd	1.7078
5	115	132	745	2.84	1.42	4.5	1	nd	1.8789
5	116	129	745	1.905	0.9525	4.53333	1	nd	3.0498
5	117	112	743	10.869	5.4345	4.56667	1	nd	3.1339
5	118	94	747	11.709	5.8545	4.6	1	nd	3.0295
5	119	88	749	4.016	2.008	4.63333	1	nd	3.563
5	120	86	751	1.796	0.898	4.66667	1	nd	2.7301
5	121	89	762	7.24	3.62	4.7	1	nd	1.821
5	122	89	766	2.54	1.27	4.73333	1	nd	2.0576
5	123	88	770	2.618	1.309	4.76667	1	nd	2.259
5	124	78	769	6.382	3.191	4.8	1	nd	1.9973
5	125	72	769	3.81	1.905	4.83333	1	nd	2.3424
5	126	70	762	4.623	2.3115	4.86667	1	nd	2.5642
5	127	65	754	5.991	2.9955	4.9	1	nd	2.2435
5	128	62	747	4.836	2.418	4.93333	1	nd	2.0633
5	129	65	743	3.175	1.5875	4.96667	1	nd	2.0633
5	130	68	742	2.008	1.004	5	1	nd	1.7817
5	131	70	735	4.623	2.3115	5.03333	1	nd	1.7426
5	132	70	730	3.175	1.5875	5.06667	1	nd	1.9931
5	133	70	723	4.445	2.2225	5.1	1	nd	2.1989
5	134	74	715	5.68	2.84	5.13333	1	nd	1.9906
5	135	78	710	4.066	2.033	5.16667	1	nd	1.8001
5	136	78	706	2.54	1.27	5.2	1	nd	1.3556
5	137	80	706	1.27	0.635	5.23333	1	nd	0.7876
5	138	80	706	0	0	5.26667	1	nd	0.4445
5	139	80	706	0	0	5.3	1	nd	0.7655
5	140	81	706	0.635	0.3175	5.33333	1	nd	1.2239
5	141	90	705	5.75	2.875	5.36667	1	nd	1.7664
5	142	96	698	5.854	2.927	5.4	1	nd	2.0282
5	143	104	701	5.425	2.7125	5.43333	1	nd	2.2187
5	144	108	702	2.618	1.309	5.46667	1	nd	2.106
5	145	108	706	2.54	1.27	5.5	1	nd	1.8381
5	146	110	713	4.623	2.3115	5.53333	1	nd	1.5496
5	147	110	718	3.175	1.5875	5.56667	1	nd	2.091
5	148	110	722	2.54	1.27	5.6	1	nd	2.091
5	149	122	726	8.032	4.016	5.63333	1	nd	1.8981
5	150	122	730	2.54	1.27	5.66667	1	nd	1.8096
5	151	125	733	2.694	1.347	5.7	1	nd	2.1938
5	152	128	731	2.29	1.145	5.73333	1	nd	2.092
5	153	138	730	6.382	3.191	5.76667	1	nd	2.0285
5	154	149	729	7.014	3.507	5.8	1	nd	2.2711
5	155	149	726	1.905	0.9525	5.83333	1	nd	2.2961
5	156	153	719	5.12	2.56	5.86667	1	nd	1.7849
5	157	153	715	2.54	1.27	5.9	1	nd	1.147
5	158	153	713	1.27	0.635	5.93333	1	nd	1.0835
5	159	152	713	0.635	0.3175	5.96667	1	nd	2.2335
5	160	152	715	1.27	0.635	6	1	nd	2.5545
5	161	149	741	16.62	8.31	6.03333	1	nd	2.6893
5	162	148	750	5.75	2.875	6.06667	1	nd	2.8876
5	163	149	754	2.618	1.309	6.1	1	nd	2.9511
5	164	148	758	2.618	1.309	6.13333	1	nd	1.5509
5	165	148	761	1.905	0.9525	6.16667	1	nd	1.5783
5	166	149	765	2.618	1.309	6.2	1	nd	1.6585
5	167	152	774	6.024	3.012	6.23333	1	nd	2.1613
5	168	150	779	3.42	1.71	6.26667	1	nd	2.0343
5	169	149	791	7.646	3.823	6.3	1	nd	2.471
5	170	148	791	0.635	0.3175	6.33333	1	nd	2.587
5	171	137	791	6.985	3.4925	6.36667	1	nd	2.6516
5	172	129	783	7.184	3.592	6.4	1	nd	2.1488
5	173	125	778	4.066	2.033	6.43333	1	nd	2.2273
5	174	124	774	2.618	1.309	6.46667	1	nd	1.7906
5	175	126	773	1.42	0.71	6.5	1	nd	1.3262
5	176	125	769	2.618	1.309	6.53333	1	nd	1.0616
5	177	121	769	2.54	1.27	6.56667	1	nd	0.8896
5	178	122	767	1.42	0.71	6.6	1	nd	1.2938
5	179	121	766	0.898	0.449	6.63333	1	nd	1.6311
5	180	128	761	5.462	2.731	6.66667	1	nd	1.5779
5	181	133	753	5.991	2.9955	6.7	1	nd	1.7534
5	182	134	750	2.008	1.004	6.73333	1	nd	1.9811
5	183	138	747	3.175	1.5875	6.76667	1	nd	1.6967
5	184	141	743	3.175	1.5875	6.8	1	nd	1.4786
5	185	142	739	2.618	1.309	6.83333	1	nd	1.5318
5	186	142	733	3.81	1.905	6.86667	1	nd	1.3413
5	187	142	729	2.54	1.27	6.9	1	nd	1.2856
5	188	142	727	1.27	0.635	6.93333	1	nd	1.3941
5	189	141	723	2.618	1.309	6.96667	1	nd	1.3551
5	190	138	718	3.703	1.8515	7	1	nd	1.2807
5	191	140	713	3.42	1.71	7.03333	1	nd	1.4077
5	192	142	711	1.796	0.898	7.06667	1	nd	1.3255
5	193	142	707	2.54	1.27	7.1	1	nd	1.2092
5	194	144	705	1.796	0.898	7.13333	1	nd	1.0468
5	195	144	701	2.54	1.27	7.16667	1	nd	0.9942
5	196	142	699	1.796	0.898	7.2	1	nd	1.1212
5	197	140	699	1.27	0.635	7.23333	1	nd	0.9416
5	198	134	699	3.81	1.905	7.26667	1	nd	0.8296
5	199	134	699	0	0	7.3	1	nd	1.162
5	200	133	701	1.42	0.71	7.33333	1	nd	1.1248
5	201	132	709	5.12	2.56	7.36667	1	nd	1.0676
5	202	133	710	0.898	0.449	7.4	1	nd	1.1946
5	203	134	705	3.238	1.619	7.43333	1	nd	1.1161
5	204	134	707	1.27	0.635	7.46667	1	nd	0.6676
5	205	133	707	0.635	0.3175	7.5	1	nd	0.5778
5	206	132	707	0.635	0.3175	7.53333	1	nd	0.508
5	207	132	707	0	0	7.56667	1	nd	0.5715
5	208	136	707	2.54	1.27	7.6	1	nd	0.8255
5	209	136	710	1.905	0.9525	7.63333	1	nd	0.8518
5	210	140	713	3.175	1.5875	7.66667	1	nd	0.9416
5	211	141	714	0.898	0.449	7.7	1	nd	0.6876
5	212	142	715	0.898	0.449	7.73333	1	nd	0.7261
5	213	142	715	0	0	7.76667	1	nd	0.5991
5	214	145	713	2.29	1.145	7.8	1	nd	0.5728
5	215	145	710	1.905	0.9525	7.83333	1	nd	0.825
5	216	146	710	0.635	0.3175	7.86667	1	nd	1.054
5	217	148	715	3.42	1.71	7.9	1	nd	1.1425
5	218	150	718	2.29	1.145	7.93333	1	nd	0.952
5	219	154	721	3.175	1.5875	7.96667	1	nd	0.8885
5	220	154	721	0	0	8	1	nd	0.737
5	221	154	721	0	0	8.03333	1	nd	0.5978
5	222	157	721	1.905	0.9525	8.06667	1	nd	0.2803
5	223	158	722	0.898	0.449	8.1	1	nd	0.7639
5	224	158	722	0	0	8.13333	1	nd	0.8909
5	225	161	729	4.836	2.418	8.16667	1	nd	0.8274
5	226	161	731	1.27	0.635	8.2	1	nd	0.9281
5	227	161	729	1.27	0.635	8.23333	1	nd	1.1077
5	228	164	729	1.905	0.9525	8.26667	1	nd	0.7661
5	229	162	727	1.796	0.898	8.3	1	nd	0.9009
5	230	161	725	1.42	0.71	8.33333	1	nd	0.7739
5	231	162	729	2.618	1.309	8.36667	1	nd	0.5834
5	232	162	729	0	0	8.4	1	nd	0.7458
5	233	162	729	0	0	8.43333	1	nd	1.1158
5	234	157	727	3.42	1.71	8.46667	1	nd	0.9175
5	235	153	734	5.12	2.56	8.5	1	nd	1.4135
5	236	152	734	0.635	0.3175	8.53333	1	nd	1.858
5	237	158	739	4.96	2.48	8.56667	1	nd	1.7778
5	238	165	739	4.445	2.2225	8.6	1	nd	1.4563
5	239	169	738	2.618	1.309	8.63333	1	nd	1.4563
5	240	172	738	1.905	0.9525	8.66667	1	nd	1.1611
5	241	172	737	0.635	0.3175	8.7	1	nd	0.9071
5	242	173	734	2.008	1.004	8.73333	1	nd	0.7088
5	243	173	731	1.905	0.9525	8.76667	1	nd	0.7088
5	244	172	731	0.635	0.3175	8.8	1	nd	0.6453
5	245	169	731	1.905	0.9525	8.83333	1	nd	0.5865
5	246	169	731	0	0	8.86667	1	nd	0.523
5	247	168	733	1.42	0.71	8.9	1	nd	0.4595
5	248	168	735	1.27	0.635	8.93333	1	nd	0.396
5	249	168	735	0	0	8.96667	1	nd	0.6578
5	250	168	737	1.27	0.635	9	1	nd	0.6428
5	251	172	738	2.618	1.309	9.03333	1	nd	0.7698
5	252	174	738	1.27	0.635	9.06667	1	nd	0.9118
5	253	178	738	2.54	1.27	9.1	1	nd	0.7848
5	254	180	739	1.42	0.71	9.13333	1	nd	0.65
5	255	180	739	0	0	9.16667	1	nd	0.523
5	256	182	739	1.27	0.635	9.2	1	nd	0.4486
5	257	182	739	0	0	9.23333	1	nd	0.3066
5	258	184	741	1.796	0.898	9.26667	1	nd	0.3964
5	259	184	741	0	0	9.3	1	nd	0.3329
5	260	185	742	0.898	0.449	9.33333	1	nd	1.3268
5	261	185	743	0.635	0.3175	9.36667	1	nd	1.1472
5	262	192	757	9.939	4.9695	9.4	1	nd	1.2107
5	263	192	757	0	0	9.43333	1	nd	1.1209
5	264	192	758	0.635	0.3175	9.46667	1	nd	1.1844
5	265	192	758	0	0	9.5	1	nd	0.1905
5	266	190	758	1.27	0.635	9.53333	1	nd	0.2803
5	267	190	758	0	0	9.56667	1	nd	0.3438
5	268	189	757	0.898	0.449	9.6	1	nd	0.4073
5	269	189	755	1.27	0.635	9.63333	1	nd	0.4599
5	270	188	755	0.635	0.3175	9.66667	1	nd	0.6019
5	271	186	753	1.796	0.898	9.7	1	nd	0.5121
5	272	185	751	1.42	0.71	9.73333	1	nd	0.6691
5	273	185	751	0	0	9.76667	1	nd	0.6056
5	274	189	753	2.84	1.42	9.8	1	nd	0.426
5	275	189	753	0	0	9.83333	1	nd	0.284
5	276	189	753	0	0	9.86667	1	nd	0.411
5	277	189	753	0	0	9.9	1	nd	0.254
5	278	189	751	1.27	0.635	9.93333	1	nd	0.4445
5	279	189	753	1.27	0.635	9.96667	1	nd	0.5865
5	280	192	753	1.905	0.9525	10	1	nd	0.5865
5	281	193	751	1.42	0.71	10.0333	1	nd	0.4595
5	282	193	751	0	0	10.0667	1	nd	0.4595
5	283	193	751	0	0	10.1	1	nd	0.3325
5	284	193	753	1.27	0.635	10.1333	1	nd	0.1905
5	285	192	753	0.635	0.3175	10.1667	1	nd	0.1905
5	286	192	753	0	0	10.2	1	nd	0.3325
5	287	192	753	0	0	10.2333	1	nd	0.269
5	288	193	751	1.42	0.71	10.2667	1	nd	0.2055
5	289	193	750	0.635	0.3175	10.3	1	nd	0.396
5	290	193	750	0	0	10.3333	1	nd	0.396
5	291	193	747	1.905	0.9525	10.3667	1	nd	0.3438
5	292	193	747	0	0	10.4	1	nd	0.4073
5	293	192	746	0.898	0.449	10.4333	1	nd	0.4971
5	294	190	746	1.27	0.635	10.4667	1	nd	0.3701
5	295	189	745	0.898	0.449	10.5	1	nd	0.5497
5	296	188	745	0.635	0.3175	10.5333	1	nd	0.5234
5	297	186	743	1.796	0.898	10.5667	1	nd	0.4599
5	298	186	742	0.635	0.3175	10.6	1	nd	0.4971
5	299	186	743	0.635	0.3175	10.6333	1	nd	0.6132
5	300	186	745	1.27	0.635	10.6667	1	nd	0.6344
5	301	188	747	1.796	0.898	10.7	1	nd	0.6344
5	302	189	750	2.008	1.004	10.7333	1	nd	0.6344
5	303	190	750	0.635	0.3175	10.7667	1	nd	0.8249
5	304	190	751	0.635	0.3175	10.8	1	nd	0.6453
5	305	193	747	3.175	1.5875	10.8333	1	nd	0.508
5	306	193	747	0	0	10.8667	1	nd	0.4445
5	307	193	746	0.635	0.3175	10.9	1	nd	0.381
5	308	193	746	0	0	10.9333	1	nd	0.3253
5	309	193	746	0	0	10.9667	1	nd	NA
5	310	189	747	2.618	1.309	11	1	nd	NA
6	10	763	568	-1	-0.5	1	1	d	NA
6	11	762	567	0.898	0.449	1.03333	1	d	NA
6	12	762	567	0	0	1.06667	1	d	0.1168
6	13	762	567	0	0	1.1	1	d	0.2168
6	14	764	567	1.27	0.635	1.13333	1	d	0.1905
6	15	764	567	0	0	1.16667	1	d	0.1905
6	16	764	566	0.635	0.3175	1.2	1	d	0.3325
6	17	764	566	0	0	1.23333	1	d	0.2055
6	18	766	567	1.42	0.71	1.26667	1	d	0.3325
6	19	766	567	0	0	1.3	1	d	0.269
6	20	766	565	1.27	0.635	1.33333	1	d	0.3588
6	21	766	565	0	0	1.36667	1	d	0.2168
6	22	765	564	0.898	0.449	1.4	1	d	0.2168
6	23	765	564	0	0	1.43333	1	d	0.1533
6	24	765	564	0	0	1.46667	1	d	0.2168
6	25	765	563	0.635	0.3175	1.5	1	d	0.269
6	26	766	563	0.635	0.3175	1.53333	1	d	0.3588
6	27	768	564	1.42	0.71	1.56667	1	d	0.3588
6	28	769	563	0.898	0.449	1.6	1	d	0.3588
6	29	769	563	0	0	1.63333	1	d	0.2953
6	30	768	563	0.635	0.3175	1.66667	1	d	0.2168
6	31	768	563	0	0	1.7	1	d	0.127
6	32	767	563	0.635	0.3175	1.73333	1	d	0.127
6	33	767	563	0	0	1.76667	1	d	0.1533
6	34	767	563	0	0	1.8	1	d	0.2168
6	35	766	564	0.898	0.449	1.83333	1	d	0.1533
6	36	766	565	0.635	0.3175	1.86667	1	d	0.1533
6	37	766	565	0	0	1.9	1	d	0.2168
6	38	766	565	0	0	1.93333	1	d	0.127
6	39	767	565	0.635	0.3175	1.96667	1	d	0.0635
6	40	767	565	0	0	2	1	d	0.0635
6	41	767	565	0	0	2.03333	1	d	0.0635
6	42	767	565	0	0	2.06667	1	d	1.11e-17
6	43	767	565	0	0	2.1	1	d	1.11e-17
6	44	767	565	0	0	2.13333	1	d	0.2008
6	45	767	565	0	0	2.16667	1	d	0.3428
6	46	766	562	2.008	1.004	2.2	1	d	0.4848
6	47	767	564	1.42	0.71	2.23333	1	d	0.5483
6	48	768	566	1.42	0.71	2.26667	1	d	0.6118
6	49	768	565	0.635	0.3175	2.3	1	d	0.411
6	50	769	565	0.635	0.3175	2.33333	1	d	0.269
6	51	769	565	0	0	2.36667	1	d	0.127
6	52	769	565	0	0	2.4	1	d	0.127
6	53	769	565	0	0	2.43333	1	d	0.0635
6	54	768	565	0.635	0.3175	2.46667	1	d	0.0635
6	55	768	565	0	0	2.5	1	d	0.0635
6	56	768	565	0	0	2.53333	1	d	0.127
6	57	768	565	0	0	2.56667	1	d	0.127
6	58	768	564	0.635	0.3175	2.6	1	d	0.127
6	59	769	564	0.635	0.3175	2.63333	1	d	0.127
6	60	769	564	0	0	2.66667	1	d	0.1905
6	61	769	564	0	0	2.7	1	d	0.1905
6	62	769	565	0.635	0.3175	2.73333	1	d	0.127
6	63	770	565	0.635	0.3175	2.76667	1	d	0.2168
6	64	770	565	0	0	2.8	1	d	0.2803
6	65	769	566	0.898	0.449	2.83333	1	d	0.2168
6	66	769	567	0.635	0.3175	2.86667	1	d	0.2168
6	67	769	567	0	0	2.9	1	d	0.2803
6	68	769	566	0.635	0.3175	2.93333	1	d	0.1905
6	69	769	565	0.635	0.3175	2.96667	1	d	0.127
6	70	769	565	0	0	3	1	d	0.127
6	71	769	565	0	0	3.03333	1	d	0.0635
6	72	769	565	0	0	3.06667	1	d	1.11e-17
6	73	769	565	0	0	3.1	1	d	0.0635
6	74	769	565	0	0	3.13333	1	d	0.1533
6	75	769	564	0.635	0.3175	3.16667	1	d	0.1533
6	76	770	563	0.898	0.449	3.2	1	d	0.1533
6	77	770	563	0	0	3.23333	1	d	0.2168
6	78	770	563	0	0	3.26667	1	d	0.1533
6	79	769	563	0.635	0.3175	3.3	1	d	0.0635
6	80	769	563	0	0	3.33333	1	d	0.1533
6	81	769	563	0	0	3.36667	1	d	0.1533
6	82	770	564	0.898	0.449	3.4	1	d	0.0898
6	83	770	564	0	0	3.43333	1	d	0.0898
6	84	770	564	0	0	3.46667	1	d	0.0898
6	85	770	564	0	0	3.5	1	d	0.0898
6	86	770	564	0	0	3.53333	1	d	0.1533
6	87	769	565	0.898	0.449	3.56667	1	d	0.2168
6	88	769	564	0.635	0.3175	3.6	1	d	0.2168
6	89	769	563	0.635	0.3175	3.63333	1	d	0.2168
6	90	769	563	0	0	3.66667	1	d	0.127
6	91	769	563	0	0	3.7	1	d	0.0635
6	92	769	563	0	0	3.73333	1	d	0.127
6	93	769	563	0	0	3.76667	1	d	0.127
6	94	771	563	1.27	0.635	3.8	1	d	0.127
6	95	771	563	0	0	3.83333	1	d	0.127
6	96	771	563	0	0	3.86667	1	d	0.127
6	97	771	563	0	0	3.9	1	d	1.11e-17
6	98	771	563	0	0	3.93333	1	d	1.11e-17
6	99	771	563	0	0	3.96667	1	d	1.11e-17
6	100	771	563	0	0	4	1	d	1.11e-17
6	101	771	563	0	0	4.03333	1	d	0.0898
6	102	771	563	0	0	4.06667	1	d	0.0898
6	103	770	564	0.898	0.449	4.1	1	d	0.0898
6	104	770	564	0	0	4.13333	1	d	0.0898
6	105	770	564	0	0	4.16667	1	d	0.0898
6	106	770	564	0	0	4.2	1	d	0.0635
6	107	770	564	0	0	4.23333	1	d	0.0635
6	108	769	564	0.635	0.3175	4.26667	1	d	0.0635
6	109	769	564	0	0	4.3	1	d	0.0635
6	110	769	564	0	0	4.33333	1	d	0.0635
6	111	769	564	0	0	4.36667	1	d	1.11e-17
6	112	769	564	0	0	4.4	1	d	0.0898
6	113	769	564	0	0	4.43333	1	d	0.1533
6	114	768	563	0.898	0.449	4.46667	1	d	0.2168
6	115	769	563	0.635	0.3175	4.5	1	d	0.2168
6	116	769	562	0.635	0.3175	4.53333	1	d	0.3066
6	117	769	562	0	0	4.56667	1	d	0.3066
6	118	770	563	0.898	0.449	4.6	1	d	0.2431
6	119	771	564	0.898	0.449	4.63333	1	d	0.2431
6	120	771	564	0	0	4.66667	1	d	0.3066
6	121	772	564	0.635	0.3175	4.7	1	d	0.2803
6	122	772	563	0.635	0.3175	4.73333	1	d	0.254
6	123	771	563	0.635	0.3175	4.76667	1	d	0.3175
6	124	771	562	0.635	0.3175	4.8	1	d	0.254
6	125	770	562	0.635	0.3175	4.83333	1	d	0.254
6	126	770	562	0	0	4.86667	1	d	0.254
6	127	769	562	0.635	0.3175	4.9	1	d	0.1905
6	128	768	562	0.635	0.3175	4.93333	1	d	0.127
6	129	768	562	0	0	4.96667	1	d	0.127
6	130	768	562	0	0	5	1	d	0.0635
6	131	768	562	0	0	5.03333	1	d	1.11e-17
6	132	768	562	0	0	5.06667	1	d	1.11e-17
6	133	768	562	0	0	5.1	1	d	1.11e-17
6	134	768	562	0	0	5.13333	1	d	1.11e-17
6	135	768	562	0	0	5.16667	1	d	1.11e-17
6	136	768	562	0	0	5.2	1	d	1.11e-17
6	137	768	562	0	0	5.23333	1	d	1.11e-17
6	138	768	562	0	0	5.26667	1	d	1.11e-17
6	139	768	562	0	0	5.3	1	d	0.0635
6	140	768	562	0	0	5.33333	1	d	0.0635
6	141	768	563	0.635	0.3175	5.36667	1	d	0.0635
6	142	768	563	0	0	5.4	1	d	0.0635
6	143	768	563	0	0	5.43333	1	d	0.0635
6	144	768	563	0	0	5.46667	1	d	0.0898
6	145	768	563	0	0	5.5	1	d	0.0898
6	146	769	564	0.898	0.449	5.53333	1	d	0.1533
6	147	769	564	0	0	5.56667	1	d	0.1533
6	148	770	564	0.635	0.3175	5.6	1	d	0.2168
6	149	770	564	0	0	5.63333	1	d	0.127
6	150	770	563	0.635	0.3175	5.66667	1	d	0.127
6	151	770	563	0	0	5.7	1	d	0.0635
6	152	770	563	0	0	5.73333	1	d	0.127
6	153	770	563	0	0	5.76667	1	d	0.0635
6	154	770	562	0.635	0.3175	5.8	1	d	0.0635
6	155	770	562	0	0	5.83333	1	d	0.0635
6	156	770	562	0	0	5.86667	1	d	0.0635
6	157	770	562	0	0	5.9	1	d	1.11e-17
6	158	770	562	0	0	5.93333	1	d	1.11e-17
6	159	770	562	0	0	5.96667	1	d	1.11e-17
6	160	770	562	0	0	6	1	d	0.0635
6	161	770	562	0	0	6.03333	1	d	0.0635
6	162	769	562	0.635	0.3175	6.06667	1	d	0.0635
6	163	769	562	0	0	6.1	1	d	0.0635
6	164	769	562	0	0	6.13333	1	d	0.0635
6	165	769	562	0	0	6.16667	1	d	0.0635
6	166	769	562	0	0	6.2	1	d	0.0635
6	167	769	561	0.635	0.3175	6.23333	1	d	0.0635
6	168	769	561	0	0	6.26667	1	d	0.0635
6	169	769	561	0	0	6.3	1	d	0.0635
6	170	769	561	0	0	6.33333	1	d	1.11e-17
6	171	769	561	0	0	6.36667	1	d	1.11e-17
6	172	769	561	0	0	6.4	1	d	1.11e-17
6	173	769	561	0	0	6.43333	1	d	1.11e-17
6	174	769	561	0	0	6.46667	1	d	0.0635
6	175	769	561	0	0	6.5	1	d	0.1533
6	176	769	562	0.635	0.3175	6.53333	1	d	0.1533
6	177	770	563	0.898	0.449	6.56667	1	d	0.1533
6	178	770	563	0	0	6.6	1	d	0.2168
6	179	770	563	0	0	6.63333	1	d	0.1533
6	180	770	562	0.635	0.3175	6.66667	1	d	0.0635
6	181	770	562	0	0	6.7	1	d	0.0635
6	182	770	562	0	0	6.73333	1	d	0.0635
6	183	770	562	0	0	6.76667	1	d	0.0635
6	184	770	562	0	0	6.8	1	d	0.0635
6	185	770	561	0.635	0.3175	6.83333	1	d	0.127
6	186	770	561	0	0	6.86667	1	d	0.127
6	187	769	561	0.635	0.3175	6.9	1	d	0.1905
6	188	769	561	0	0	6.93333	1	d	0.127
6	189	769	562	0.635	0.3175	6.96667	1	d	0.1905
6	190	769	562	0	0	7	1	d	0.127
6	191	769	563	0.635	0.3175	7.03333	1	d	0.127
6	192	769	563	0	0	7.06667	1	d	0.0635
6	193	769	563	0	0	7.1	1	d	0.0635
6	194	769	563	0	0	7.13333	1	d	0.0635
6	195	769	563	0	0	7.16667	1	d	0.0635
6	196	769	562	0.635	0.3175	7.2	1	d	0.0635
6	197	769	562	0	0	7.23333	1	d	0.127
6	198	769	562	0	0	7.26667	1	d	0.127
6	199	768	562	0.635	0.3175	7.3	1	d	0.0635
6	200	768	562	0	0	7.33333	1	d	0.0635
6	201	768	562	0	0	7.36667	1	d	0.127
6	202	768	562	0	0	7.4	1	d	0.0635
6	203	768	561	0.635	0.3175	7.43333	1	d	0.1533
6	204	768	561	0	0	7.46667	1	d	0.1533
6	205	769	562	0.898	0.449	7.5	1	d	0.1533
6	206	769	562	0	0	7.53333	1	d	0.1796
6	207	769	562	0	0	7.56667	1	d	0.1796
6	208	770	563	0.898	0.449	7.6	1	d	0.0898
6	209	770	563	0	0	7.63333	1	d	0.0898
6	210	770	563	0	0	7.66667	1	d	0.2168
6	211	770	563	0	0	7.7	1	d	0.127
6	212	772	563	1.27	0.635	7.73333	1	d	0.1905
6	213	772	563	0	0	7.76667	1	d	0.1905
6	214	772	562	0.635	0.3175	7.8	1	d	0.254
6	215	772	562	0	0	7.83333	1	d	0.127
6	216	772	561	0.635	0.3175	7.86667	1	d	0.127
6	217	772	561	0	0	7.9	1	d	0.0635
6	218	772	561	0	0	7.93333	1	d	0.0635
6	219	772	561	0	0	7.96667	1	d	0.0635
6	220	772	561	0	0	8	1	d	0.0635
6	221	772	562	0.635	0.3175	8.03333	1	d	0.0635
6	222	772	562	0	0	8.06667	1	d	0.127
6	223	772	562	0	0	8.1	1	d	0.127
6	224	771	562	0.635	0.3175	8.13333	1	d	0.0635
6	225	771	562	0	0	8.16667	1	d	0.127
6	226	771	562	0	0	8.2	1	d	0.127
6	227	771	563	0.635	0.3175	8.23333	1	d	0.127
6	228	771	563	0	0	8.26667	1	d	0.127
6	229	770	563	0.635	0.3175	8.3	1	d	0.127
6	230	770	563	0	0	8.33333	1	d	0.0635
6	231	770	563	0	0	8.36667	1	d	0.0635
6	232	770	563	0	0	8.4	1	d	1.11e-17
6	233	770	563	0	0	8.43333	1	d	1.11e-17
6	234	770	563	0	0	8.46667	1	d	1.11e-17
6	235	770	563	0	0	8.5	1	d	1.11e-17
6	236	770	563	0	0	8.53333	1	d	1.11e-17
6	237	770	563	0	0	8.56667	1	d	1.11e-17
6	238	770	563	0	0	8.6	1	d	0.0635
6	239	770	563	0	0	8.63333	1	d	0.0635
6	240	770	564	0.635	0.3175	8.66667	1	d	0.0635
6	241	770	564	0	0	8.7	1	d	0.0635
6	242	770	564	0	0	8.73333	1	d	0.0635
6	243	770	564	0	0	8.76667	1	d	1.11e-17
6	244	770	564	0	0	8.8	1	d	1.11e-17
6	245	770	564	0	0	8.83333	1	d	0.0898
6	246	770	564	0	0	8.86667	1	d	0.0898
6	247	771	563	0.898	0.449	8.9	1	d	0.0898
6	248	771	563	0	0	8.93333	1	d	0.0898
6	249	771	563	0	0	8.96667	1	d	0.2694
6	250	771	563	0	0	9	1	d	0.1796
6	251	773	561	1.796	0.898	9.03333	1	d	0.1796
6	252	773	561	0	0	9.06667	1	d	0.1796
6	253	773	561	0	0	9.1	1	d	0.1796
6	254	773	561	0	0	9.13333	1	d	1.11e-17
6	255	773	561	0	0	9.16667	1	d	0.0635
6	256	773	561	0	0	9.2	1	d	0.0635
6	257	774	561	0.635	0.3175	9.23333	1	d	0.1533
6	258	774	561	0	0	9.26667	1	d	0.3329
6	259	775	560	0.898	0.449	9.3	1	d	0.3329
6	260	777	558	1.796	0.898	9.33333	1	d	0.2694
6	261	777	558	0	0	9.36667	1	d	0.4114
6	262	777	558	0	0	9.4	1	d	0.3216
6	263	778	556	1.42	0.71	9.43333	1	d	0.142
6	264	778	556	0	0	9.46667	1	d	0.2318
6	265	778	556	0	0	9.5	1	d	0.2318
6	266	777	555	0.898	0.449	9.53333	1	d	0.0898
6	267	777	555	0	0	9.56667	1	d	0.0898
6	268	777	555	0	0	9.6	1	d	0.0898
6	269	777	555	0	0	9.63333	1	d	0.0898
6	270	777	555	0	0	9.66667	1	d	0.1533
6	271	776	554	0.898	0.449	9.7	1	d	0.1533
6	272	776	553	0.635	0.3175	9.73333	1	d	0.1533
6	273	776	553	0	0	9.76667	1	d	0.1533
6	274	776	553	0	0	9.8	1	d	0.0635
6	275	776	553	0	0	9.83333	1	d	0.0635
6	276	776	553	0	0	9.86667	1	d	0.127
6	277	776	552	0.635	0.3175	9.9	1	d	0.127
6	278	776	551	0.635	0.3175	9.93333	1	d	0.127
6	279	776	551	0	0	9.96667	1	d	0.1905
6	280	776	551	0	0	10	1	d	0.1905
6	281	776	552	0.635	0.3175	10.0333	1	d	0.127
6	282	777	552	0.635	0.3175	10.0667	1	d	0.1905
6	283	777	552	0	0	10.1	1	d	0.1905
6	284	777	553	0.635	0.3175	10.1333	1	d	0.127
6	285	777	553	0	0	10.1667	1	d	0.127
6	286	777	553	0	0	10.2	1	d	0.127
6	287	778	553	0.635	0.3175	10.2333	1	d	0.0635
6	288	778	553	0	0	10.2667	1	d	0.0635
6	289	778	553	0	0	10.3	1	d	0.127
6	290	778	553	0	0	10.3333	1	d	0.127
6	291	779	553	0.635	0.3175	10.3667	1	d	0.127
6	292	779	552	0.635	0.3175	10.4	1	d	0.127
6	293	779	552	0	0	10.4333	1	d	0.127
6	294	779	552	0	0	10.4667	1	d	0.0635
6	295	779	552	0	0	10.5	1	d	1.11e-17
6	296	779	552	0	0	10.5333	1	d	1.11e-17
6	297	779	552	0	0	10.5667	1	d	0.0635
6	298	779	552	0	0	10.6	1	d	0.2643
6	299	780	552	0.635	0.3175	10.6333	1	d	0.4063
6	300	783	551	2.008	1.004	10.6667	1	d	0.4961
6	301	781	550	1.42	0.71	10.7	1	d	0.4961
6	302	780	551	0.898	0.449	10.7333	1	d	0.4326
6	303	780	551	0	0	10.7667	1	d	0.2318
6	304	780	551	0	0	10.8	1	d	0.0898
6	305	780	551	0	0	10.8333	1	d	1.11e-17
6	306	780	551	0	0	10.8667	1	d	1.11e-17
6	307	780	551	0	0	10.9	1	d	1.11e-17
6	308	780	551	0	0	10.9333	1	d	1.11e-17
6	309	780	551	0	0	10.9667	1	d	NA
6	310	780	551	0	0	11	1	d	NA
7	10	811	585	-1	-0.5	1	1	d	NA
7	11	811	585	0	0	1.03333	1	d	NA
7	12	814	586	2.008	1.004	1.06667	1	d	0.1643
7	13	814	585	0.635	0.3175	1.1	1	d	0.2643
7	14	814	585	0	0	1.13333	1	d	0.3278
7	15	814	585	0	0	1.16667	1	d	0.254
7	16	813	585	0.635	0.3175	1.2	1	d	0.1905
7	17	813	583	1.27	0.635	1.23333	1	d	0.2803
7	18	813	583	0	0	1.26667	1	d	0.3438
7	19	812	584	0.898	0.449	1.3	1	d	0.2803
7	20	812	583	0.635	0.3175	1.33333	1	d	0.1533
7	21	812	583	0	0	1.36667	1	d	0.1533
7	22	812	583	0	0	1.4	1	d	0.0635
7	23	812	583	0	0	1.43333	1	d	0.0635
7	24	812	583	0	0	1.46667	1	d	0.0635
7	25	812	584	0.635	0.3175	1.5	1	d	0.0635
7	26	812	584	0	0	1.53333	1	d	0.1905
7	27	812	584	0	0	1.56667	1	d	0.254
7	28	814	584	1.27	0.635	1.6	1	d	0.1905
7	29	814	585	0.635	0.3175	1.63333	1	d	0.254
7	30	814	585	0	0	1.66667	1	d	0.254
7	31	814	584	0.635	0.3175	1.7	1	d	0.269
7	32	814	584	0	0	1.73333	1	d	0.2055
7	33	816	585	1.42	0.71	1.76667	1	d	0.269
7	34	816	585	0	0	1.8	1	d	0.2953
7	35	817	585	0.635	0.3175	1.83333	1	d	0.2953
7	36	818	586	0.898	0.449	1.86667	1	d	0.1533
7	37	818	586	0	0	1.9	1	d	0.1533
7	38	818	586	0	0	1.93333	1	d	0.0898
7	39	818	586	0	0	1.96667	1	d	0
7	40	818	586	0	0	2	1	d	0.142
7	41	818	586	0	0	2.03333	1	d	0.142
7	42	820	587	1.42	0.71	2.06667	1	d	0.142
7	43	820	587	0	0	2.1	1	d	0.269
7	44	820	587	0	0	2.13333	1	d	0.269
7	45	822	587	1.27	0.635	2.16667	1	d	0.1905
7	46	822	587	0	0	2.2	1	d	0.254
7	47	822	588	0.635	0.3175	2.23333	1	d	0.3175
7	48	822	589	0.635	0.3175	2.26667	1	d	0.3325
7	49	823	589	0.635	0.3175	2.3	1	d	0.4223
7	50	824	591	1.42	0.71	2.33333	1	d	0.4223
7	51	825	592	0.898	0.449	2.36667	1	d	0.5008
7	52	826	592	0.635	0.3175	2.4	1	d	0.5008
7	53	828	593	1.42	0.71	2.43333	1	d	0.4223
7	54	828	594	0.635	0.3175	2.46667	1	d	0.3325
7	55	828	595	0.635	0.3175	2.5	1	d	0.3325
7	56	828	595	0	0	2.53333	1	d	0.3701
7	57	829	595	0.635	0.3175	2.56667	1	d	0.6241
7	58	831	597	1.796	0.898	2.6	1	d	0.6241
7	59	835	600	3.175	1.5875	2.63333	1	d	0.8935
7	60	835	601	0.635	0.3175	2.66667	1	d	0.83
7	61	838	604	2.694	1.347	2.7	1	d	0.7402
7	62	838	604	0	0	2.73333	1	d	0.4862
7	63	839	605	0.898	0.449	2.76667	1	d	0.5647
7	64	838	605	0.635	0.3175	2.8	1	d	0.3588
7	65	837	603	1.42	0.71	2.83333	1	d	0.5493
7	66	837	602	0.635	0.3175	2.86667	1	d	0.6015
7	67	837	599	1.905	0.9525	2.9	1	d	0.7388
7	68	839	600	1.42	0.71	2.93333	1	d	0.7873
7	69	840	603	2.008	1.004	2.96667	1	d	0.7873
7	70	840	606	1.905	0.9525	3	1	d	1.0591
7	71	840	607	0.635	0.3175	3.03333	1	d	1.5553
7	72	842	614	4.623	2.3115	3.06667	1	d	1.4965
7	73	841	624	6.382	3.191	3.1	1	d	1.306
7	74	842	626	1.42	0.71	3.13333	1	d	1.2425
7	75	842	626	0	0	3.16667	1	d	0.87
7	76	842	626	0	0	3.2	1	d	0.3216
7	77	841	625	0.898	0.449	3.23333	1	d	0.3804
7	78	840	624	0.898	0.449	3.26667	1	d	0.5709
7	79	843	623	2.008	1.004	3.3	1	d	0.6344
7	80	846	623	1.905	0.9525	3.33333	1	d	0.6866
7	81	847	623	0.635	0.3175	3.36667	1	d	0.8808
7	82	848	625	1.42	0.71	3.4	1	d	1.176
7	83	850	629	2.84	1.42	3.43333	1	d	1.1863
7	84	855	635	4.96	2.48	3.46667	1	d	1.1863
7	85	856	638	2.008	1.004	3.5	1	d	1.3681
7	86	857	638	0.635	0.3175	3.53333	1	d	1.0841
7	87	862	637	3.238	1.619	3.56667	1	d	0.7301
7	88	862	637	0	0	3.6	1	d	0.5293
7	89	864	636	1.42	0.71	3.63333	1	d	0.5293
7	90	864	636	0	0	3.66667	1	d	0.269
7	91	864	635	0.635	0.3175	3.7	1	d	0.396
7	92	864	634	0.635	0.3175	3.73333	1	d	0.381
7	93	864	632	1.27	0.635	3.76667	1	d	0.381
7	94	864	630	1.27	0.635	3.8	1	d	0.3175
7	95	864	630	0	0	3.83333	1	d	0.3438
7	96	864	630	0	0	3.86667	1	d	0.3588
7	97	863	629	0.898	0.449	3.9	1	d	0.2953
7	98	861	628	1.42	0.71	3.93333	1	d	0.2953
7	99	861	627	0.635	0.3175	3.96667	1	d	0.2953
7	100	861	627	0	0	4	1	d	0.2055
7	101	861	627	0	0	4.03333	1	d	0.127
7	102	861	627	0	0	4.06667	1	d	0.127
7	103	860	627	0.635	0.3175	4.1	1	d	0.1905
7	104	860	626	0.635	0.3175	4.13333	1	d	0.3175
7	105	860	627	0.635	0.3175	4.16667	1	d	0.7241
7	106	862	627	1.27	0.635	4.2	1	d	0.9224
7	107	866	622	4.066	2.033	4.23333	1	d	2.9534
7	108	867	618	2.618	1.309	4.26667	1	d	3.1439
7	109	875	586	20.945	10.4725	4.3	1	d	3.4185
7	110	875	582	2.54	1.27	4.33333	1	d	3.4379
7	111	873	576	4.016	2.008	4.36667	1	d	3.8511
7	112	870	570	4.26	2.13	4.4	1	d	2.026
7	113	863	562	6.75	3.375	4.43333	1	d	1.8618
7	114	860	559	2.694	1.347	4.46667	1	d	1.7296
7	115	859	558	0.898	0.449	4.5	1	d	1.3671
7	116	856	555	2.694	1.347	4.53333	1	d	0.8826
7	117	856	554	0.635	0.3175	4.56667	1	d	0.6132
7	118	856	551	1.905	0.9525	4.6	1	d	0.9097
7	119	856	551	0	0	4.63333	1	d	0.6403
7	120	862	552	3.863	1.9315	4.66667	1	d	0.5768
7	121	862	552	0	0	4.7	1	d	0.4498
7	122	862	552	0	0	4.73333	1	d	0.5133
7	123	862	551	0.635	0.3175	4.76667	1	d	0.2168
7	124	861	551	0.635	0.3175	4.8	1	d	0.2168
7	125	862	552	0.898	0.449	4.83333	1	d	0.4176
7	126	862	552	0	0	4.86667	1	d	0.5549
7	127	859	551	2.008	1.004	4.9	1	d	0.6334
7	128	856	550	2.008	1.004	4.93333	1	d	0.6071
7	129	854	549	1.42	0.71	4.96667	1	d	0.6071
7	130	853	549	0.635	0.3175	5	1	d	0.6353
7	131	853	549	0	0	5.03333	1	d	0.5765
7	132	851	552	2.29	1.145	5.06667	1	d	0.5243
7	133	849	551	1.42	0.71	5.1	1	d	0.6898
7	134	848	552	0.898	0.449	5.13333	1	d	0.9738
7	135	846	555	2.29	1.145	5.16667	1	d	0.8346
7	136	844	559	2.84	1.42	5.2	1	d	0.6926
7	137	843	560	0.898	0.449	5.23333	1	d	0.6663
7	138	843	560	0	0	5.26667	1	d	0.4373
7	139	843	561	0.635	0.3175	5.3	1	d	0.2168
7	140	843	561	0	0	5.33333	1	d	0.127
7	141	842	561	0.635	0.3175	5.36667	1	d	0.127
7	142	842	561	0	0	5.4	1	d	0.2055
7	143	842	561	0	0	5.43333	1	d	0.396
7	144	841	563	1.42	0.71	5.46667	1	d	0.4595
7	145	841	566	1.905	0.9525	5.5	1	d	0.6015
7	146	841	568	1.27	0.635	5.53333	1	d	0.665
7	147	842	570	1.42	0.71	5.56667	1	d	0.665
7	148	842	571	0.635	0.3175	5.6	1	d	0.538
7	149	843	573	1.42	0.71	5.63333	1	d	0.411
7	150	843	574	0.635	0.3175	5.66667	1	d	0.269
7	151	843	574	0	0	5.7	1	d	0.2055
7	152	843	574	0	0	5.73333	1	d	0.127
7	153	843	574	0	0	5.76667	1	d	0.0635
7	154	843	573	0.635	0.3175	5.8	1	d	0.0635
7	155	843	573	0	0	5.83333	1	d	0.0635
7	156	843	573	0	0	5.86667	1	d	0.2643
7	157	843	573	0	0	5.9	1	d	0.2008
7	158	846	572	2.008	1.004	5.93333	1	d	0.2008
7	159	846	572	0	0	5.96667	1	d	0.2008
7	160	846	572	0	0	6	1	d	0.2008
7	161	846	572	0	0	6.03333	1	d	0.0635
7	162	846	572	0	0	6.06667	1	d	0.0635
7	163	846	571	0.635	0.3175	6.1	1	d	0.0635
7	164	846	571	0	0	6.13333	1	d	0.0635
7	165	846	571	0	0	6.16667	1	d	0.0635
7	166	846	571	0	0	6.2	1	d	-3.44e-16
7	167	846	571	0	0	6.23333	1	d	-3.44e-16
7	168	846	571	0	0	6.26667	1	d	-3.44e-16
7	169	846	571	0	0	6.3	1	d	0.142
7	170	846	571	0	0	6.33333	1	d	0.269
7	171	848	570	1.42	0.71	6.36667	1	d	0.269
7	172	848	572	1.27	0.635	6.4	1	d	0.269
7	173	848	572	0	0	6.43333	1	d	0.3325
7	174	848	572	0	0	6.46667	1	d	0.254
7	175	848	573	0.635	0.3175	6.5	1	d	0.127
7	176	847	573	0.635	0.3175	6.53333	1	d	0.269
7	177	847	573	0	0	6.56667	1	d	0.269
7	178	848	575	1.42	0.71	6.6	1	d	0.2953
7	179	848	575	0	0	6.63333	1	d	0.4326
7	180	849	576	0.898	0.449	6.66667	1	d	0.4326
7	181	852	577	2.008	1.004	6.7	1	d	0.2906
7	182	852	577	0	0	6.73333	1	d	0.2906
7	183	852	577	0	0	6.76667	1	d	1.0898
7	184	852	577	0	0	6.8	1	d	0.9788
7	185	866	577	8.89	4.445	6.83333	1	d	1.1208
7	186	867	576	0.898	0.449	6.86667	1	d	1.1208
7	187	869	577	1.42	0.71	6.9	1	d	1.1208
7	188	869	577	0	0	6.93333	1	d	0.3588
7	189	869	577	0	0	6.96667	1	d	0.411
7	190	867	577	1.27	0.635	7	1	d	0.3325
7	191	866	579	1.42	0.71	7.03333	1	d	0.396
7	192	865	579	0.635	0.3175	7.06667	1	d	0.4595
7	193	864	579	0.635	0.3175	7.1	1	d	0.3325
7	194	863	579	0.635	0.3175	7.13333	1	d	0.254
7	195	863	579	0	0	7.16667	1	d	0.1905
7	196	862	579	0.635	0.3175	7.2	1	d	0.2168
7	197	862	579	0	0	7.23333	1	d	0.3329
7	198	861	580	0.898	0.449	7.26667	1	d	0.4599
7	199	859	582	1.796	0.898	7.3	1	d	0.5384
7	200	857	582	1.27	0.635	7.33333	1	d	0.6019
[truncated: 34,121 more rows]

## Sheet: Fig 5C cell parameters 
Cell fate and speed cluster membership data presented in Fig 5C
Each tracked cell has a unique track_ID, which links it to speed tracking data in sheet "Fig5B speed tracks"
track_ID	date	day	position	fate	division time (h)	cluster
1	20180213	1	3	nd	na	2
2	20180213	1	3	d	16.7	2
3	20180213	1	3	nd	na	2
4	20180213	1	3	nd	na	2
5	20180213	1	3	nd	na	1
6	20180213	1	3	d	24.3	2
7	20180213	1	3	d	14.2333	2
8	20180213	1	3	d	23.1667	2
9	20180213	1	3	d	15.0333	2
10	20180213	1	3	d	17.9667	2
11	20180213	1	4	nd	na	2
12	20180213	1	4	d	16.8333	2
13	20180213	1	4	d	22.8667	2
14	20180213	1	4	d	15	2
15	20180213	1	4	nd	na	1
16	20180213	1	4	nd	na	1
17	20180213	1	4	d	19.8	2
18	20180213	1	4	nd	na	2
19	20180213	1	4	nd	na	1
20	20180213	1	4	d	23.1667	2
21	20180213	1	6	d	16.4667	2
22	20180213	1	6	nd	na	1
23	20180213	1	6	d	25.3333	2
24	20180213	1	6	d	17.5	2
25	20180213	1	6	nd	na	2
26	20180213	1	6b	nd	na	2
27	20180213	1	6b	d	20.1667	2
28	20180213	1	6b	d	15.5667	2
29	20180213	1	6b	d	16.3667	2
30	20180213	1	6b	d	16.8667	2
31	20180215	2	4	nd	na	2
32	20180215	2	4	d	16.9333	2
33	20180215	2	4	d	20.9	2
34	20180215	2	4	nd	na	1
35	20180215	2	4	d	15.4333	2
36	20180215	2	4	nd	na	1
37	20180215	2	4	d	15.2667	2
38	20180215	2	4	d	19.3667	2
39	20180215	2	4	d	13.5333	2
40	20180215	2	4	d	24.8667	2
41	20180215	2	6	d	13.4	2
42	20180215	2	6	d	17.6333	2
43	20180215	2	6	d	17.5	2
44	20180215	2	6	d	18.8	2
45	20180215	2	7	nd	na	1
46	20180215	2	7	d	19.3667	2
47	20180215	2	7	d	10.2	2
48	20180215	2	7	d	26.1	2
49	20180215	2	7	d	19.6	2
50	20180215	2	7	nd	na	1
51	20180215	2	7	d	23.6667	2
52	20180215	2	1	nd	na	2
53	20180215	2	1	d	26.1	1
54	20180215	2	1	d	16.9333	2
55	20180215	2	1	d	12.7	2
56	20180215	2	1	nd	na	1
57	20180215	2	1	nd	na	1
58	20180215	2	1	nd	na	1
59	20180215	2	5	d	18.2333	2
60	20180215	2	5	d	16.1333	2
61	20180222	3	4	d	19.7667	2
62	20180222	3	4	d	14	2
63	20180222	3	4	d	22.4667	2
64	20180222	3	4	d	16.1	1
65	20180222	3	4	d	15.7667	1
66	20180222	3	4	nd	na	1
67	20180222	3	4	d	15.3	2
68	20180222	3	4	d	14.7333	2
69	20180222	3	4	d	17.7	2
70	20180222	3	4	nd	na	1
71	20180222	3	5	nd	na	1
72	20180222	3	5	nd	na	1
73	20180222	3	5	nd	na	1
74	20180222	3	5	nd	na	2
75	20180222	3	5	d	19.9	2
76	20180222	3	5	d	24	2
77	20180222	3	5	d	10.3	2
78	20180222	3	5	d	16.9333	2
79	20180222	3	5	d	19.0333	2
80	20180222	3	5	d	20.6	1
81	20180222	3	8	d	24.6667	2
82	20180222	3	8	d	13.5333	2
83	20180222	3	8	d	21.0333	2
84	20180222	3	8	d	17.7	2
85	20180222	3	8	nd	na	1
86	20180222	3	8	d	20	2
87	20180222	3	8	d	20.3333	2
88	20180222	3	8	d	15.0667	2
89	20180222	3	8	d	16.5667	1
90	20180222	3	1	nd	na	1
91	20180227	4	3	d	16.8	2
92	20180227	4	3	d	21.3667	2
93	20180227	4	3	d	16.8667	2
94	20180227	4	3	d	21.1	2
95	20180227	4	3	nd	na	2
96	20180227	4	3	nd	na	2
97	20180227	4	3	nd	na	1
98	20180227	4	3	d	18.5	2
99	20180227	4	3	d	15.5	2
100	20180227	4	3	nd	na	2
101	20180227	4	4	d	14.6667	2
102	20180227	4	4	nd	na	2
103	20180227	4	4	nd	na	1
104	20180227	4	4	d	12.9	2
105	20180227	4	4	d	14.1	2
106	20180227	4	4	d	15.6667	2
107	20180227	4	4	d	21.8667	2
108	20180227	4	4	nd	na	2
109	20180227	4	4	d	20.0667	2
110	20180227	4	4	d	13.9333	1
111	20180227	4	5	nd	na	1
112	20180227	4	5	nd	na	2
113	20180227	4	5	d	17.0333	2
114	20180227	4	5	d	22.6333	2
115	20180227	4	5	nd	na	2
116	20180227	4	5	d	13.1667	2
117	20180227	4	5	d	20.5	2
118	20180227	4	5	d	24.8	2
119	20180227	4	5	nd	na	2
120	20180227	4	5	d	17.0333	2

## Sheet: Fig 5 supp 1C
Figure 5 supplementary figure 1C Persistence data for tracked cells
Each tracked cells has a unique track_ID, which links it to the speed tracks and cell parameter data presented in Fig 5B and Fig 5C
track_ID	slice	X	Y	distance (µm)	Time (h)	window accumulated distance (µm)	Xdiff (pixel)	Ydiff (pixel)	Xdiff (µm)	Ydiff (µm)	window Euclidean distance (µm)	persistence (AU)
1	10	777	134	0	1	NA	NA	NA	NA	NA	NA	NA
1	11	776	134	0.635	1.03333	NA	NA	NA	NA	NA	NA	NA
1	12	777	134	0.635	1.06667	NA	NA	NA	NA	NA	NA	NA
1	13	777	134	0	1.1	NA	NA	NA	NA	NA	NA	NA
1	14	777	134	0	1.13333	NA	NA	NA	NA	NA	NA	NA
1	15	777	134	0	1.16667	NA	NA	NA	NA	NA	NA	NA
1	16	777	133	0.635	1.2	NA	NA	NA	NA	NA	NA	NA
1	17	777	133	0	1.23333	NA	NA	NA	NA	NA	NA	NA
1	18	777	134	0.635	1.26667	NA	NA	NA	NA	NA	NA	NA
1	19	778	135	0.898	1.3	NA	NA	NA	NA	NA	NA	NA
1	20	777	136	0.898	1.33333	NA	NA	NA	NA	NA	NA	NA
1	21	777	137	0.635	1.36667	NA	NA	NA	NA	NA	NA	NA
1	22	777	137	0	1.4	NA	NA	NA	NA	NA	NA	NA
1	23	777	139	1.27	1.43333	NA	NA	NA	NA	NA	NA	NA
1	24	777	139	0	1.46667	NA	NA	NA	NA	NA	NA	NA
1	25	777	138	0.635	1.5	6.876	0	4	0	2.54	2.54	0.369401
1	26	777	138	0	1.53333	6.876	1	4	0.635	2.54	2.61817	0.38077
1	27	777	138	0	1.56667	6.241	0	4	0	2.54	2.54	0.406986
1	28	777	138	0	1.6	5.606	0	4	0	2.54	2.54	0.453086
1	29	777	138	0	1.63333	5.606	0	4	0	2.54	2.54	0.453086
1	30	777	138	0	1.66667	5.606	0	4	0	2.54	2.54	0.453086
1	31	777	137	0.635	1.7	6.241	0	4	0	2.54	2.54	0.406986
1	32	777	137	0	1.73333	5.606	0	4	0	2.54	2.54	0.453086
1	33	777	136	0.635	1.76667	6.241	0	2	0	1.27	1.27	0.203493
1	34	778	136	0.635	1.8	6.241	0	1	0	0.635	0.635	0.101747
1	35	778	136	0	1.83333	5.343	1	0	0.635	0	0.635	0.118847
1	36	778	137	0.635	1.86667	5.08	1	0	0.635	0	0.635	0.125
1	37	778	137	0	1.9	4.445	1	0	0.635	0	0.635	0.142857
1	38	778	137	0	1.93333	4.445	1	-2	0.635	-1.27	1.4199	0.319438
1	39	780	137	1.27	1.96667	4.445	3	-2	1.905	-1.27	2.28953	0.515079
1	40	781	137	0.635	2	5.08	4	-1	2.54	-0.635	2.61817	0.515388
1	41	780	137	0.635	2.03333	5.08	3	-1	1.905	-0.635	2.00805	0.395285
1	42	779	137	0.635	2.06667	5.715	2	-1	1.27	-0.635	1.4199	0.248452
1	43	779	137	0	2.1	5.715	2	-1	1.27	-0.635	1.4199	0.248452
1	44	779	137	0	2.13333	5.715	2	-1	1.27	-0.635	1.4199	0.248452
1	45	779	137	0	2.16667	5.715	2	-1	1.27	-0.635	1.4199	0.248452
1	46	779	137	0	2.2	5.715	2	0	1.27	0	1.27	0.222222
1	47	779	137	0	2.23333	5.08	2	0	1.27	0	1.27	0.25
1	48	779	137	0	2.26667	5.08	2	1	1.27	0.635	1.4199	0.279508
1	49	778	137	0.635	2.3	5.08	0	1	0	0.635	0.635	0.125
1	50	778	137	0	2.33333	4.445	0	1	0	0.635	0.635	0.142857
1	51	778	137	0	2.36667	4.445	0	0	0	0	0	0
1	52	778	137	0	2.4	3.81	0	0	0	0	0	0
1	53	777	137	0.635	2.43333	4.445	-1	0	-0.635	0	0.635	0.142857
1	54	777	137	0	2.46667	4.445	-3	0	-1.905	0	1.905	0.428571
1	55	778	137	0.635	2.5	3.81	-3	0	-1.905	0	1.905	0.5
1	56	778	138	0.635	2.53333	3.81	-2	1	-1.27	0.635	1.4199	0.372678
1	57	778	138	0	2.56667	3.175	-1	1	-0.635	0.635	0.898026	0.282843
1	58	778	138	0	2.6	2.54	-1	1	-0.635	0.635	0.898026	0.353553
1	59	778	138	0	2.63333	2.54	-1	1	-0.635	0.635	0.898026	0.353553
1	60	778	138	0	2.66667	2.54	-1	1	-0.635	0.635	0.898026	0.353553
1	61	778	138	0	2.7	2.54	-1	1	-0.635	0.635	0.898026	0.353553
1	62	778	138	0	2.73333	2.54	-1	1	-0.635	0.635	0.898026	0.353553
1	63	778	138	0	2.76667	2.54	-1	1	-0.635	0.635	0.898026	0.353553
1	64	779	136	1.42	2.8	3.96	1	-1	0.635	-0.635	0.898026	0.226774
1	65	779	136	0	2.83333	3.325	1	-1	0.635	-0.635	0.898026	0.270083
1	66	779	136	0	2.86667	3.325	1	-1	0.635	-0.635	0.898026	0.270083
1	67	779	135	0.635	2.9	3.96	1	-2	0.635	-1.27	1.4199	0.358561
1	68	779	135	0	2.93333	3.96	2	-2	1.27	-1.27	1.79605	0.453548
1	69	779	134	0.635	2.96667	3.96	2	-3	1.27	-1.905	2.28953	0.578163
1	70	779	134	0	3	3.96	1	-3	0.635	-1.905	2.00805	0.507082
1	71	779	135	0.635	3.03333	3.96	1	-3	0.635	-1.905	2.00805	0.507082
1	72	779	135	0	3.06667	3.325	1	-3	0.635	-1.905	2.00805	0.603924
1	73	779	135	0	3.1	3.325	1	-3	0.635	-1.905	2.00805	0.603924
1	74	779	135	0	3.13333	3.325	1	-3	0.635	-1.905	2.00805	0.603924
1	75	780	135	0.635	3.16667	3.96	2	-3	1.27	-1.905	2.28953	0.578163
1	76	780	135	0	3.2	3.96	2	-3	1.27	-1.905	2.28953	0.578163
1	77	780	135	0	3.23333	3.96	2	-3	1.27	-1.905	2.28953	0.578163
1	78	780	134	0.635	3.26667	4.595	2	-4	1.27	-2.54	2.83981	0.618021
1	79	780	133	0.635	3.3	5.23	1	-3	0.635	-1.905	2.00805	0.383948
1	80	780	133	0	3.33333	3.81	1	-3	0.635	-1.905	2.00805	0.527046
1	81	780	133	0	3.36667	3.81	1	-3	0.635	-1.905	2.00805	0.527046
1	82	781	133	0.635	3.4	4.445	2	-2	1.27	-1.27	1.79605	0.404061
1	83	781	133	0	3.43333	3.81	2	-2	1.27	-1.27	1.79605	0.471405
1	84	781	133	0	3.46667	3.81	2	-1	1.27	-0.635	1.4199	0.372678
1	85	781	134	0.635	3.5	3.81	2	0	1.27	0	1.27	0.333333
1	86	781	134	0	3.53333	3.81	2	-1	1.27	-0.635	1.4199	0.372678
1	87	781	134	0	3.56667	3.175	2	-1	1.27	-0.635	1.4199	0.447214
1	88	781	134	0	3.6	3.175	2	-1	1.27	-0.635	1.4199	0.447214
1	89	781	135	0.635	3.63333	3.81	2	0	1.27	0	1.27	0.333333
1	90	781	135	0	3.66667	3.81	1	0	0.635	0	0.635	0.166667
1	91	781	135	0	3.7	3.175	1	0	0.635	0	0.635	0.2
1	92	781	135	0	3.73333	3.175	1	0	0.635	0	0.635	0.2
1	93	781	135	0	3.76667	3.175	1	1	0.635	0.635	0.898026	0.282843
1	94	780	135	0.635	3.8	3.175	0	2	0	1.27	1.27	0.4
1	95	780	135	0	3.83333	2.54	0	2	0	1.27	1.27	0.5
1	96	780	135	0	3.86667	2.54	0	2	0	1.27	1.27	0.5
1	97	780	135	0	3.9	2.54	-1	2	-0.635	1.27	1.4199	0.559017
1	98	780	135	0	3.93333	1.905	-1	2	-0.635	1.27	1.4199	0.745356
1	99	779	135	0.635	3.96667	2.54	-2	2	-1.27	1.27	1.79605	0.707107
1	100	779	135	0	4	2.54	-2	1	-1.27	0.635	1.4199	0.559017
1	101	778	135	0.635	4.03333	2.54	-3	1	-1.905	0.635	2.00805	0.790569
1	102	778	135	0	4.06667	2.54	-3	1	-1.905	0.635	2.00805	0.790569
1	103	778	135	0	4.1	2.54	-3	1	-1.905	0.635	2.00805	0.790569
1	104	778	135	0	4.13333	2.54	-3	0	-1.905	0	1.905	0.75
1	105	778	135	0	4.16667	1.905	-3	0	-1.905	0	1.905	1
1	106	778	135	0	4.2	1.905	-3	0	-1.905	0	1.905	1
1	107	778	135	0	4.23333	1.905	-3	0	-1.905	0	1.905	1
1	108	778	135	0	4.26667	1.905	-3	0	-1.905	0	1.905	1
1	109	778	135	0	4.3	1.905	-2	0	-1.27	0	1.27	0.666667
1	110	778	135	0	4.33333	1.27	-2	0	-1.27	0	1.27	1
1	111	778	135	0	4.36667	1.27	-2	0	-1.27	0	1.27	1
1	112	778	135	0	4.4	1.27	-2	0	-1.27	0	1.27	1
1	113	777	133	1.42	4.43333	2.69	-3	-2	-1.905	-1.27	2.28953	0.851125
1	114	777	133	0	4.46667	2.69	-2	-2	-1.27	-1.27	1.79605	0.667677
1	115	777	133	0	4.5	2.055	-2	-2	-1.27	-1.27	1.79605	0.873991
1	116	777	133	0	4.53333	2.055	-1	-2	-0.635	-1.27	1.4199	0.69095
1	117	777	134	0.635	4.56667	2.055	-1	-1	-0.635	-0.635	0.898026	0.436995
1	118	777	134	0	4.6	2.055	-1	-1	-0.635	-0.635	0.898026	0.436995
1	119	777	134	0	4.63333	2.055	-1	-1	-0.635	-0.635	0.898026	0.436995
1	120	778	135	0.898	4.66667	2.953	0	0	0	0	0	0
1	121	778	135	0	4.7	2.953	0	0	0	0	0	0
1	122	778	134	0.635	4.73333	3.588	0	-1	0	-0.635	0.635	0.176979
1	123	779	134	0.635	4.76667	4.223	1	-1	0.635	-0.635	0.898026	0.212651
1	124	779	134	0	4.8	4.223	1	-1	0.635	-0.635	0.898026	0.212651
1	125	779	134	0	4.83333	4.223	1	-1	0.635	-0.635	0.898026	0.212651
1	126	779	135	0.635	4.86667	4.858	1	0	0.635	0	0.635	0.130712
1	127	780	135	0.635	4.9	5.493	2	0	1.27	0	1.27	0.231203
1	128	780	135	0	4.93333	5.493	3	2	1.905	1.27	2.28953	0.416808
1	129	780	135	0	4.96667	4.073	3	2	1.905	1.27	2.28953	0.562123
1	130	780	135	0	5	4.073	3	2	1.905	1.27	2.28953	0.562123
1	131	780	135	0	5.03333	4.073	3	2	1.905	1.27	2.28953	0.562123
1	132	780	135	0	5.06667	4.073	3	1	1.905	0.635	2.00805	0.493014
1	133	781	135	0.635	5.1	4.073	4	1	2.54	0.635	2.61817	0.642812
1	134	781	135	0	5.13333	4.073	4	1	2.54	0.635	2.61817	0.642812
1	135	780	134	0.898	5.16667	4.971	2	-1	1.27	-0.635	1.4199	0.285637
1	136	780	134	0	5.2	4.073	2	-1	1.27	-0.635	1.4199	0.348614
1	137	780	134	0	5.23333	4.073	2	0	1.27	0	1.27	0.311809
1	138	780	133	0.635	5.26667	4.073	1	-1	0.635	-0.635	0.898026	0.220483
1	139	780	133	0	5.3	3.438	1	-1	0.635	-0.635	0.898026	0.261206
1	140	779	133	0.635	5.33333	4.073	0	-1	0	-0.635	0.635	0.155905
1	141	779	133	0	5.36667	4.073	0	-2	0	-1.27	1.27	0.311809
1	142	779	133	0	5.4	3.438	-1	-2	-0.635	-1.27	1.4199	0.413003
1	143	779	133	0	5.43333	2.803	-1	-2	-0.635	-1.27	1.4199	0.506566
1	144	779	133	0	5.46667	2.803	-1	-2	-0.635	-1.27	1.4199	0.506566
1	145	779	133	0	5.5	2.803	-1	-2	-0.635	-1.27	1.4199	0.506566
1	146	779	133	0	5.53333	2.803	-1	-2	-0.635	-1.27	1.4199	0.506566
1	147	779	133	0	5.56667	2.803	-1	-2	-0.635	-1.27	1.4199	0.506566
1	148	779	132	0.635	5.6	3.438	-2	-3	-1.27	-1.905	2.28953	0.665947
1	149	779	131	0.635	5.63333	3.438	-2	-4	-1.27	-2.54	2.83981	0.826005
1	150	779	131	0	5.66667	3.438	-1	-3	-0.635	-1.905	2.00805	0.584074
1	151	779	131	0	5.7	2.54	-1	-3	-0.635	-1.905	2.00805	0.790569
1	152	779	131	0	5.73333	2.54	-1	-3	-0.635	-1.905	2.00805	0.790569
1	153	779	131	0	5.76667	2.54	-1	-2	-0.635	-1.27	1.4199	0.559017
1	154	780	131	0.635	5.8	2.54	0	-2	0	-1.27	1.27	0.5
1	155	781	131	0.635	5.83333	3.175	2	-2	1.27	-1.27	1.79605	0.565685
1	156	781	131	0	5.86667	2.54	2	-2	1.27	-1.27	1.79605	0.707107
1	157	781	131	0	5.9	2.54	2	-2	1.27	-1.27	1.79605	0.707107
1	158	781	131	0	5.93333	2.54	2	-2	1.27	-1.27	1.79605	0.707107
1	159	781	131	0	5.96667	2.54	2	-2	1.27	-1.27	1.79605	0.707107
1	160	780	131	0.635	6	3.175	1	-2	0.635	-1.27	1.4199	0.447214
1	161	780	131	0	6.03333	3.175	1	-2	0.635	-1.27	1.4199	0.447214
1	162	780	131	0	6.06667	3.175	1	-2	0.635	-1.27	1.4199	0.447214
1	163	780	131	0	6.1	3.175	1	-1	0.635	-0.635	0.898026	0.282843
1	164	780	131	0	6.13333	2.54	1	0	0.635	0	0.635	0.25
1	165	780	131	0	6.16667	1.905	1	0	0.635	0	0.635	0.333333
1	166	781	130	0.898	6.2	2.803	2	-1	1.27	-0.635	1.4199	0.506566
1	167	781	130	0	6.23333	2.803	2	-1	1.27	-0.635	1.4199	0.506566
1	168	782	130	0.635	6.26667	3.438	3	-1	1.905	-0.635	2.00805	0.584074
1	169	782	133	1.905	6.3	5.343	2	2	1.27	1.27	1.79605	0.33615
1	170	783	133	0.635	6.33333	5.343	2	2	1.27	1.27	1.79605	0.33615
1	171	784	133	0.635	6.36667	5.343	3	2	1.905	1.27	2.28953	0.428509
1	172	786	134	1.42	6.4	6.763	5	3	3.175	1.905	3.70265	0.547487
1	173	786	134	0	6.43333	6.763	5	3	3.175	1.905	3.70265	0.547487
1	174	787	134	0.635	6.46667	7.398	6	3	3.81	1.905	4.25971	0.575792
1	175	788	134	0.635	6.5	8.033	8	3	5.08	1.905	5.42544	0.675394
1	176	788	133	0.635	6.53333	8.033	8	2	5.08	1.27	5.23634	0.651854
1	177	787	132	0.898	6.56667	8.931	7	1	4.445	0.635	4.49013	0.502758
1	178	787	131	0.635	6.6	9.566	7	0	4.445	0	4.445	0.464667
1	179	786	130	0.898	6.63333	10.464	6	-1	3.81	-0.635	3.86255	0.369128
1	180	786	130	0	6.66667	10.464	6	-1	3.81	-0.635	3.86255	0.369128
1	181	786	130	0	6.7	10.464	5	0	3.175	0	3.175	0.303421
1	182	786	129	0.635	6.73333	10.201	5	-1	3.175	-0.635	3.23788	0.317408
1	183	787	130	0.898	6.76667	11.099	5	0	3.175	0	3.175	0.286062
1	184	787	130	0	6.8	10.464	5	-3	3.175	-1.905	3.70265	0.353847
1	185	787	130	0	6.83333	8.559	4	-3	2.54	-1.905	3.175	0.370955
1	186	788	131	0.898	6.86667	8.822	4	-2	2.54	-1.27	2.83981	0.321901
1	187	788	131	0	6.9	8.187	2	-3	1.27	-1.905	2.28953	0.279654
1	188	787	130	0.898	6.93333	7.665	1	-4	0.635	-2.54	2.61817	0.341575
1	189	787	130	0	6.96667	7.665	0	-4	0	-2.54	2.54	0.331376
1	190	787	130	0	7	7.03	-1	-4	-0.635	-2.54	2.61817	0.372428
1	191	787	130	0	7.03333	6.395	-1	-3	-0.635	-1.905	2.00805	0.314003
1	192	787	130	0	7.06667	5.76	0	-2	0	-1.27	1.27	0.220486
1	193	787	130	0	7.1	4.862	0	-1	0	-0.635	0.635	0.130605
1	194	788	130	0.635	7.13333	4.862	2	0	1.27	0	1.27	0.261209
1	195	790	131	1.42	7.16667	5.384	4	1	2.54	0.635	2.61817	0.486288
1	196	790	131	0	7.2	5.384	4	1	2.54	0.635	2.61817	0.486288
1	197	790	132	0.635	7.23333	6.019	4	3	2.54	1.905	3.175	0.527496
1	198	789	132	0.635	7.26667	6.019	2	2	1.27	1.27	1.79605	0.298397
1	199	788	132	0.635	7.3	5.756	1	2	0.635	1.27	1.4199	0.246682
1	200	788	132	0	7.33333	5.756	1	2	0.635	1.27	1.4199	0.246682
1	201	789	132	0.635	7.36667	6.391	1	1	0.635	0.635	0.898026	0.140514
1	202	788	132	0.635	7.4	6.128	0	1	0	0.635	0.635	0.103623
1	203	788	133	0.635	7.43333	6.763	1	3	0.635	1.905	2.00805	0.296917
1	204	788	133	0	7.46667	5.865	1	3	0.635	1.905	2.00805	0.342378
1	205	788	133	0	7.5	5.865	1	3	0.635	1.905	2.00805	0.342378
1	206	787	132	0.898	7.53333	6.763	0	2	0	1.27	1.27	0.187786
1	207	787	132	0	7.56667	6.763	0	2	0	1.27	1.27	0.187786
1	208	786	131	0.898	7.6	7.661	-1	1	-0.635	0.635	0.898026	0.11722
1	209	787	129	1.42	7.63333	9.081	-1	-1	-0.635	-0.635	0.898026	0.0988906
1	210	787	128	0.635	7.66667	9.081	-3	-3	-1.905	-1.905	2.69408	0.296672
1	211	787	128	0	7.7	7.661	-3	-3	-1.905	-1.905	2.69408	0.351661
1	212	787	128	0	7.73333	7.661	-3	-4	-1.905	-2.54	3.175	0.414437
1	213	787	128	0	7.76667	7.026	-2	-4	-1.27	-2.54	2.83981	0.404185
1	214	787	128	0	7.8	6.391	-1	-4	-0.635	-2.54	2.61817	0.409665
1	215	787	128	0	7.83333	5.756	-1	-4	-0.635	-2.54	2.61817	0.45486
1	216	787	129	0.635	7.86667	6.391	-2	-3	-1.27	-1.905	2.28953	0.358242
1	217	787	130	0.635	7.9	6.391	-1	-2	-0.635	-1.27	1.4199	0.222172
1	218	787	130	0	7.93333	5.756	-1	-3	-0.635	-1.905	2.00805	0.348861
1	219	788	131	0.898	7.96667	6.019	0	-2	0	-1.27	1.27	0.210999
1	220	787	131	0.635	8	6.654	-1	-2	-0.635	-1.27	1.4199	0.213391
1	221	787	131	0	8.03333	6.654	0	-1	0	-0.635	0.635	0.0954313
1	222	787	131	0	8.06667	5.756	0	-1	0	-0.635	0.635	0.11032
1	223	787	131	0	8.1	5.756	1	0	0.635	0	0.635	0.11032
1	224	791	131	2.54	8.13333	7.398	4	2	2.54	1.27	2.83981	0.383861
1	225	793	128	2.29	8.16667	8.268	6	0	3.81	0	3.81	0.460813
1	226	794	127	0.898	8.2	8.531	7	-1	4.445	-0.635	4.49013	0.526331
1	227	792	125	1.796	8.23333	10.327	5	-3	3.175	-1.905	3.70265	0.358541
1	228	791	125	0.635	8.26667	10.962	4	-3	2.54	-1.905	3.175	0.289637
1	229	791	123	1.27	8.3	12.232	4	-5	2.54	-3.175	4.06598	0.332405
1	230	790	123	0.635	8.33333	12.867	3	-5	1.905	-3.175	3.70265	0.287764
1	231	790	124	0.635	8.36667	13.502	3	-5	1.905	-3.175	3.70265	0.27423
1	232	790	125	0.635	8.4	13.502	3	-5	1.905	-3.175	3.70265	0.27423
1	233	790	125	0	8.43333	12.867	3	-5	1.905	-3.175	3.70265	0.287764
1	234	792	124	1.42	8.46667	14.287	4	-7	2.54	-4.445	5.11953	0.358335
1	235	791	124	0.635	8.5	14.024	4	-7	2.54	-4.445	5.11953	0.365055
1	236	790	123	0.898	8.53333	14.287	3	-8	1.905	-5.08	5.42544	0.379747
1	237	790	123	0	8.56667	14.287	3	-8	1.905	-5.08	5.42544	0.379747
1	238	790	123	0	8.6	14.287	3	-8	1.905	-5.08	5.42544	0.379747
1	239	790	126	1.905	8.63333	16.192	-1	-5	-0.635	-3.175	3.23788	0.199968
1	240	790	126	0	8.66667	13.652	-3	-2	-1.905	-1.27	2.28953	0.167706
1	241	790	127	0.635	8.7	11.997	-4	0	-2.54	0	2.54	0.21172
1	242	789	127	0.635	8.73333	11.734	-3	2	-1.905	1.27	2.28953	0.195119
1	243	788	128	0.898	8.76667	10.836	-3	3	-1.905	1.905	2.69408	0.248623
1	244	788	128	0	8.8	10.201	-3	5	-1.905	3.175	3.70265	0.36297
1	245	788	128	0	8.83333	8.931	-2	5	-1.27	3.175	3.41958	0.382889
1	246	788	128	0	8.86667	8.296	-2	4	-1.27	2.54	2.83981	0.34231
1	247	788	128	0	8.9	7.661	-2	3	-1.27	1.905	2.28953	0.298855
1	248	787	127	0.898	8.93333	7.924	-3	2	-1.905	1.27	2.28953	0.288936
1	249	786	127	0.635	8.96667	8.559	-6	3	-3.81	1.905	4.25971	0.497688
1	250	786	127	0	9	7.139	-5	3	-3.175	1.905	3.70265	0.518652
1	251	786	127	0	9.03333	6.504	-4	4	-2.54	2.54	3.5921	0.552291
1	252	786	126	0.635	9.06667	6.241	-4	3	-2.54	1.905	3.175	0.508733
1	253	786	126	0	9.1	6.241	-4	3	-2.54	1.905	3.175	0.508733
1	254	786	126	0	9.13333	6.241	-4	0	-2.54	0	2.54	0.406986
1	255	786	126	0	9.16667	4.336	-4	0	-2.54	0	2.54	0.585793
1	256	786	126	0	9.2	4.336	-4	-1	-2.54	-0.635	2.61817	0.603822
1	257	786	126	0	9.23333	3.701	-3	-1	-1.905	-0.635	2.00805	0.542569
1	258	784	127	1.42	9.26667	4.486	-4	-1	-2.54	-0.635	2.61817	0.583632
1	259	782	126	1.42	9.3	5.008	-6	-2	-3.81	-1.27	4.01609	0.801935
1	260	782	126	0	9.33333	5.008	-6	-2	-3.81	-1.27	4.01609	0.801935
1	261	781	124	1.42	9.36667	6.428	-7	-4	-4.445	-2.54	5.11953	0.796443
1	262	781	124	0	9.4	6.428	-7	-4	-4.445	-2.54	5.11953	0.796443
1	263	781	123	0.635	9.43333	7.063	-6	-4	-3.81	-2.54	4.57905	0.648315
1	264	781	123	0	9.46667	6.165	-5	-4	-3.175	-2.54	4.06598	0.659527
1	265	781	123	0	9.5	5.53	-5	-4	-3.175	-2.54	4.06598	0.735259
1	266	781	122	0.635	9.53333	6.165	-5	-5	-3.175	-3.175	4.49013	0.728326
1	267	781	122	0	9.56667	6.165	-5	-4	-3.175	-2.54	4.06598	0.659527
1	268	780	123	0.898	9.6	6.428	-6	-3	-3.81	-1.905	4.25971	0.66268
1	269	779	122	0.898	9.63333	7.326	-7	-4	-4.445	-2.54	5.11953	0.698817
1	270	779	123	0.635	9.66667	7.961	-7	-3	-4.445	-1.905	4.83602	0.607463
1	271	779	123	0	9.7	7.961	-7	-3	-4.445	-1.905	4.83602	0.607463
1	272	779	123	0	9.73333	7.961	-7	-3	-4.445	-1.905	4.83602	0.607463
1	273	779	123	0	9.76667	7.961	-5	-4	-3.175	-2.54	4.06598	0.510738
1	274	779	124	0.635	9.8	7.176	-3	-2	-1.905	-1.27	2.28953	0.319053
1	275	779	124	0	9.83333	5.756	-3	-2	-1.905	-1.27	2.28953	0.397763
1	276	779	124	0	9.86667	5.756	-2	0	-1.27	0	1.27	0.220639
1	277	779	124	0	9.9	4.336	-2	0	-1.27	0	1.27	0.292897
1	278	778	125	0.898	9.93333	5.234	-3	2	-1.905	1.27	2.28953	0.437433
1	279	777	125	0.635	9.96667	5.234	-4	2	-2.54	1.27	2.83981	0.542569
1	280	777	125	0	10	5.234	-4	2	-2.54	1.27	2.83981	0.542569
1	281	778	125	0.635	10.0333	5.869	-3	3	-1.905	1.905	2.69408	0.459035
1	282	778	124	0.635	10.0667	5.869	-3	2	-1.905	1.27	2.28953	0.390105
1	283	779	124	0.635	10.1	6.504	-1	1	-0.635	0.635	0.898026	0.138073
1	284	779	124	0	10.1333	5.606	0	2	0	1.27	1.27	0.226543
1	285	779	124	0	10.1667	4.708	0	1	0	0.635	0.635	0.134877
1	286	782	121	2.694	10.2	6.767	3	-2	1.905	-1.27	2.28953	0.338337
1	287	783	121	0.635	10.2333	7.402	4	-2	2.54	-1.27	2.83981	0.383654
1	288	783	121	0	10.2667	7.402	4	-2	2.54	-1.27	2.83981	0.383654
1	289	782	121	0.635	10.3	8.037	3	-3	1.905	-1.905	2.69408	0.335209
1	290	784	120	1.42	10.3333	8.822	5	-4	3.175	-2.54	4.06598	0.460891
1	291	785	119	0.898	10.3667	9.72	6	-5	3.81	-3.175	4.95951	0.510238
1	292	785	119	0	10.4	9.72	6	-5	3.81	-3.175	4.95951	0.510238
1	293	786	119	0.635	10.4333	10.355	8	-6	5.08	-3.81	6.35	0.61323
1	294	786	119	0	10.4667	9.457	9	-6	5.715	-3.81	6.86858	0.726295
1	295	786	119	0	10.5	8.822	9	-6	5.715	-3.81	6.86858	0.778573
1	296	786	118	0.635	10.5333	9.457	8	-7	5.08	-4.445	6.75014	0.713772
1	297	786	117	0.635	10.5667	9.457	8	-7	5.08	-4.445	6.75014	0.713772
1	298	786	117	0	10.6	8.822	7	-7	4.445	-4.445	6.28618	0.712557
1	299	786	117	0	10.6333	8.187	7	-7	4.445	-4.445	6.28618	0.767825
1	300	786	116	0.635	10.6667	8.822	7	-8	4.445	-5.08	6.75014	0.765149
1	301	787	115	0.898	10.7	9.72	5	-6	3.175	-3.81	4.95951	0.510238
1	302	787	115	0	10.7333	7.026	4	-6	2.54	-3.81	4.57905	0.651729
1	303	786	115	0.635	10.7667	7.026	3	-6	1.905	-3.81	4.25971	0.606278
1	304	785	114	0.898	10.8	7.924	3	-7	1.905	-4.445	4.83602	0.6103
1	305	785	114	0	10.8333	7.289	1	-6	0.635	-3.81	3.86255	0.529916
1	306	784	114	0.635	10.8667	6.504	-1	-5	-0.635	-3.175	3.23788	0.497829
1	307	784	113	0.635	10.9	6.241	-1	-6	-0.635	-3.81	3.86255	0.6189
1	308	784	112	0.635	10.9333	6.876	-2	-7	-1.27	-4.445	4.62287	0.67232
1	309	785	113	0.898	10.9667	7.139	-1	-6	-0.635	-3.81	3.86255	0.54105
1	310	785	113	0	11	7.139	-1	-6	-0.635	-3.81	3.86255	0.54105
2	10	592	223	0	1	NA	NA	NA	NA	NA	NA	NA
2	11	593	225	1.42	1.03333	NA	NA	NA	NA	NA	NA	NA
2	12	590	224	2.008	1.06667	NA	NA	NA	NA	NA	NA	NA
2	13	591	224	0.635	1.1	NA	NA	NA	NA	NA	NA	NA
2	14	592	225	0.898	1.13333	NA	NA	NA	NA	NA	NA	NA
2	15	592	225	0	1.16667	NA	NA	NA	NA	NA	NA	NA
2	16	594	225	1.27	1.2	NA	NA	NA	NA	NA	NA	NA
2	17	594	225	0	1.23333	NA	NA	NA	NA	NA	NA	NA
2	18	596	224	1.42	1.26667	NA	NA	NA	NA	NA	NA	NA
2	19	596	224	0	1.3	NA	NA	NA	NA	NA	NA	NA
2	20	596	223	0.635	1.33333	NA	NA	NA	NA	NA	NA	NA
2	21	599	223	1.905	1.36667	NA	NA	NA	NA	NA	NA	NA
2	22	600	222	0.898	1.4	NA	NA	NA	NA	NA	NA	NA
2	23	600	222	0	1.43333	NA	NA	NA	NA	NA	NA	NA
2	24	600	221	0.635	1.46667	NA	NA	NA	NA	NA	NA	NA
2	25	599	221	0.635	1.5	12.359	7	-2	4.445	-1.27	4.62287	0.374049
2	26	599	221	0	1.53333	12.359	6	-4	3.81	-2.54	4.57905	0.370503
2	27	598	220	0.898	1.56667	11.837	8	-4	5.08	-2.54	5.67961	0.479819
2	28	598	220	0	1.6	9.829	7	-4	4.445	-2.54	5.11953	0.52086
2	29	598	220	0	1.63333	9.194	6	-5	3.81	-3.175	4.95951	0.539429
2	30	597	221	0.898	1.66667	9.194	5	-4	3.175	-2.54	4.06598	0.442243
2	31	596	223	1.42	1.7	10.614	2	-2	1.27	-1.27	1.79605	0.169215
2	32	596	223	0	1.73333	9.344	2	-2	1.27	-1.27	1.79605	0.192214
2	33	596	225	1.27	1.76667	10.614	0	1	0	0.635	0.635	0.0598266
2	34	596	225	0	1.8	9.194	0	1	0	0.635	0.635	0.0690668
2	35	595	225	0.635	1.83333	9.829	-1	2	-0.635	1.27	1.4199	0.144461
2	36	595	225	0	1.86667	9.194	-4	2	-2.54	1.27	2.83981	0.308876
2	37	595	225	0	1.9	7.289	-5	3	-3.175	1.905	3.70265	0.507978
2	38	595	225	0	1.93333	6.391	-5	3	-3.175	1.905	3.70265	0.579354
2	39	595	225	0	1.96667	6.391	-5	4	-3.175	2.54	4.06598	0.636205
2	40	594	225	0.635	2	6.391	-5	4	-3.175	2.54	4.06598	0.636205
2	41	594	225	0	2.03333	5.756	-5	4	-3.175	2.54	4.06598	0.706391
2	42	592	223	1.796	2.06667	7.552	-6	3	-3.81	1.905	4.25971	0.564051
2	43	592	223	0	2.1	6.654	-6	3	-3.81	1.905	4.25971	0.640173
2	44	592	223	0	2.13333	6.654	-6	3	-3.81	1.905	4.25971	0.640173
2	45	592	224	0.635	2.16667	7.289	-5	3	-3.175	1.905	3.70265	0.507978
2	46	592	224	0	2.2	6.391	-4	1	-2.54	0.635	2.61817	0.409665
2	47	594	224	1.27	2.23333	6.241	-2	1	-1.27	0.635	1.4199	0.227512
2	48	594	224	0	2.26667	6.241	-2	-1	-1.27	-0.635	1.4199	0.227512
2	49	594	225	0.635	2.3	5.606	-2	0	-1.27	0	1.27	0.226543
2	50	594	225	0	2.33333	5.606	-1	0	-0.635	0	0.635	0.113271
2	51	594	225	0	2.36667	4.971	-1	0	-0.635	0	0.635	0.127741
2	52	594	225	0	2.4	4.971	-1	0	-0.635	0	0.635	0.127741
2	53	594	225	0	2.43333	4.971	-1	0	-0.635	0	0.635	0.127741
2	54	596	226	1.42	2.46667	6.391	1	1	0.635	0.635	0.898026	0.140514
2	55	596	225	0.635	2.5	7.026	2	0	1.27	0	1.27	0.180757
2	56	596	225	0	2.53333	6.391	2	0	1.27	0	1.27	0.198717
2	57	596	225	0	2.56667	6.391	4	2	2.54	1.27	2.83981	0.444345
2	58	596	225	0	2.6	4.595	4	2	2.54	1.27	2.83981	0.618021
2	59	596	225	0	2.63333	4.595	4	2	2.54	1.27	2.83981	0.618021
2	60	596	224	0.635	2.66667	5.23	4	0	2.54	0	2.54	0.48566
2	61	596	224	0	2.7	4.595	4	0	2.54	0	2.54	0.552775
2	62	596	224	0	2.73333	4.595	2	0	1.27	0	1.27	0.276387
2	63	596	224	0	2.76667	3.325	2	0	1.27	0	1.27	0.381955
2	64	594	223	1.42	2.8	4.745	0	-2	0	-1.27	1.27	0.26765
2	65	594	224	0.635	2.83333	4.745	0	-1	0	-0.635	0.635	0.133825
2	66	594	224	0	2.86667	4.745	0	-1	0	-0.635	0.635	0.133825
2	67	594	224	0	2.9	4.745	0	-1	0	-0.635	0.635	0.133825
2	68	594	224	0	2.93333	4.745	0	-1	0	-0.635	0.635	0.133825
2	69	594	224	0	2.96667	4.745	-2	-2	-1.27	-1.27	1.79605	0.378514
2	70	594	223	0.635	3	3.96	-2	-2	-1.27	-1.27	1.79605	0.453548
2	71	594	223	0	3.03333	3.325	-2	-2	-1.27	-1.27	1.79605	0.540166
2	72	593	223	0.635	3.06667	3.96	-3	-2	-1.905	-1.27	2.28953	0.578163
2	73	593	223	0	3.1	3.96	-3	-2	-1.905	-1.27	2.28953	0.578163
2	74	593	223	0	3.13333	3.96	-3	-2	-1.905	-1.27	2.28953	0.578163
2	75	593	223	0	3.16667	3.96	-3	-1	-1.905	-0.635	2.00805	0.507082
2	76	594	223	0.635	3.2	3.96	-2	-1	-1.27	-0.635	1.4199	0.358561
2	77	594	223	0	3.23333	3.96	-2	-1	-1.27	-0.635	1.4199	0.358561
2	78	594	223	0	3.26667	3.96	-2	-1	-1.27	-0.635	1.4199	0.358561
2	79	594	223	0	3.3	3.96	0	0	0	0	0	0
2	80	594	222	0.635	3.33333	3.175	0	-2	0	-1.27	1.27	0.4
2	81	594	221	0.635	3.36667	3.175	0	-3	0	-1.905	1.905	0.6
2	82	594	221	0	3.4	3.175	0	-3	0	-1.905	1.905	0.6
2	83	594	221	0	3.43333	3.175	0	-3	0	-1.905	1.905	0.6
2	84	595	222	0.898	3.46667	4.073	1	-2	0.635	-1.27	1.4199	0.348614
2	85	595	222	0	3.5	4.073	1	-1	0.635	-0.635	0.898026	0.220483
2	86	595	222	0	3.53333	3.438	1	-1	0.635	-0.635	0.898026	0.261206
2	87	595	222	0	3.56667	3.438	2	-1	1.27	-0.635	1.4199	0.413003
2	88	596	222	0.635	3.6	3.438	3	-1	1.905	-0.635	2.00805	0.584074
2	89	596	222	0	3.63333	3.438	3	-1	1.905	-0.635	2.00805	0.584074
2	90	596	222	0	3.66667	3.438	3	-1	1.905	-0.635	2.00805	0.584074
2	91	596	222	0	3.7	3.438	2	-1	1.27	-0.635	1.4199	0.413003
2	92	596	222	0	3.73333	2.803	2	-1	1.27	-0.635	1.4199	0.506566
2	93	596	222	0	3.76667	2.803	2	-1	1.27	-0.635	1.4199	0.506566
2	94	596	222	0	3.8	2.803	2	-1	1.27	-0.635	1.4199	0.506566
2	95	596	222	0	3.83333	2.803	2	0	1.27	0	1.27	0.453086
2	96	597	223	0.898	3.86667	3.066	3	2	1.905	1.27	2.28953	0.746747
2	97	597	223	0	3.9	2.431	3	2	1.905	1.27	2.28953	0.941804
2	98	597	223	0	3.93333	2.431	3	2	1.905	1.27	2.28953	0.941804
2	99	596	222	0.898	3.96667	3.329	1	0	0.635	0	0.635	0.190748
2	100	596	222	0	4	2.431	1	0	0.635	0	0.635	0.261209
2	101	596	222	0	4.03333	2.431	1	0	0.635	0	0.635	0.261209
2	102	596	222	0	4.06667	2.431	1	0	0.635	0	0.635	0.261209
2	103	596	222	0	4.1	2.431	0	0	0	0	0	0
2	104	596	222	0	4.13333	1.796	0	0	0	0	0	0
2	105	596	222	0	4.16667	1.796	0	0	0	0	0	0
2	106	596	222	0	4.2	1.796	0	0	0	0	0	0
2	107	596	222	0	4.23333	1.796	0	0	0	0	0	0
2	108	596	223	0.635	4.26667	2.431	0	1	0	0.635	0.635	0.261209
2	109	596	223	0	4.3	2.431	0	1	0	0.635	0.635	0.261209
2	110	596	223	0	4.33333	2.431	0	1	0	0.635	0.635	0.261209
2	111	596	223	0	4.36667	2.431	-1	0	-0.635	0	0.635	0.261209
2	112	596	223	0	4.4	1.533	-1	0	-0.635	0	0.635	0.41422
2	113	596	223	0	4.43333	1.533	-1	0	-0.635	0	0.635	0.41422
2	114	596	223	0	4.46667	1.533	0	1	0	0.635	0.635	0.41422
2	115	595	223	0.635	4.5	1.27	-1	1	-0.635	0.635	0.898026	0.707107
2	116	595	223	0	4.53333	1.27	-1	1	-0.635	0.635	0.898026	0.707107
2	117	595	223	0	4.56667	1.27	-1	1	-0.635	0.635	0.898026	0.707107
2	118	595	223	0	4.6	1.27	-1	1	-0.635	0.635	0.898026	0.707107
2	119	595	223	0	4.63333	1.27	-1	1	-0.635	0.635	0.898026	0.707107
2	120	595	223	0	4.66667	1.27	-1	1	-0.635	0.635	0.898026	0.707107
2	121	595	223	0	4.7	1.27	-1	1	-0.635	0.635	0.898026	0.707107
2	122	595	223	0	4.73333	1.27	-1	1	-0.635	0.635	0.898026	0.707107
2	123	594	223	0.635	4.76667	1.905	-2	0	-1.27	0	1.27	0.666667
2	124	594	223	0	4.8	1.27	-2	0	-1.27	0	1.27	1
2	125	594	223	0	4.83333	1.27	-2	0	-1.27	0	1.27	1
2	126	594	223	0	4.86667	1.27	-2	0	-1.27	0	1.27	1
2	127	593	222	0.898	4.9	2.168	-3	-1	-1.905	-0.635	2.00805	0.926221
2	128	592	221	0.898	4.93333	3.066	-4	-2	-2.54	-1.27	2.83981	0.926225
2	129	592	221	0	4.96667	3.066	-4	-2	-2.54	-1.27	2.83981	0.926225
2	130	592	221	0	5	3.066	-3	-2	-1.905	-1.27	2.28953	0.746747
2	131	592	221	0	5.03333	2.431	-3	-2	-1.905	-1.27	2.28953	0.941804
2	132	592	220	0.635	5.06667	3.066	-3	-3	-1.905	-1.905	2.69408	0.878694
2	133	592	220	0	5.1	3.066	-3	-3	-1.905	-1.905	2.69408	0.878694
2	134	593	220	0.635	5.13333	3.701	-2	-3	-1.27	-1.905	2.28953	0.618623
2	135	593	219	0.635	5.16667	4.336	-2	-4	-1.27	-2.54	2.83981	0.654937
2	136	593	219	0	5.2	4.336	-2	-4	-1.27	-2.54	2.83981	0.654937
2	137	593	219	0	5.23333	4.336	-2	-4	-1.27	-2.54	2.83981	0.654937
2	138	593	219	0	5.26667	4.336	-1	-4	-0.635	-2.54	2.61817	0.603822
2	139	593	220	0.635	5.3	4.336	-1	-3	-0.635	-1.905	2.00805	0.46311
2	140	592	221	0.898	5.33333	5.234	-2	-2	-1.27	-1.27	1.79605	0.343151
2	141	592	221	0	5.36667	5.234	-2	-2	-1.27	-1.27	1.79605	0.343151
2	142	592	221	0	5.4	5.234	-1	-1	-0.635	-0.635	0.898026	0.171575
2	143	592	222	0.635	5.43333	4.971	0	1	0	0.635	0.635	0.127741
2	144	592	221	0.635	5.46667	4.708	0	0	0	0	0	0
2	145	591	220	0.898	5.5	5.606	-1	-1	-0.635	-0.635	0.898026	0.16019
2	146	591	220	0	5.53333	5.606	-1	-1	-0.635	-0.635	0.898026	0.16019
2	147	591	219	0.635	5.56667	6.241	-1	-1	-0.635	-0.635	0.898026	0.143891
2	148	591	219	0	5.6	5.606	-1	-1	-0.635	-0.635	0.898026	0.16019
2	149	591	219	0	5.63333	5.606	-2	-1	-1.27	-0.635	1.4199	0.253283
2	150	591	219	0	5.66667	4.971	-2	0	-1.27	0	1.27	0.255482
2	151	591	219	0	5.7	4.336	-2	0	-1.27	0	1.27	0.292897
2	152	591	219	0	5.73333	4.336	-2	0	-1.27	0	1.27	0.292897
2	153	591	219	0	5.76667	4.336	-2	0	-1.27	0	1.27	0.292897
2	154	591	218	0.635	5.8	4.971	-2	-2	-1.27	-1.27	1.79605	0.361306
2	155	591	218	0	5.83333	4.336	-1	-3	-0.635	-1.905	2.00805	0.46311
2	156	591	218	0	5.86667	3.438	-1	-3	-0.635	-1.905	2.00805	0.584074
2	157	592	219	0.898	5.9	4.336	0	-2	0	-1.27	1.27	0.292897
2	158	592	219	0	5.93333	4.336	0	-3	0	-1.905	1.905	0.439345
2	159	592	219	0	5.96667	3.701	0	-2	0	-1.27	1.27	0.343151
2	160	592	219	0	6	3.066	1	-1	0.635	-0.635	0.898026	0.292898
2	161	592	219	0	6.03333	2.168	1	-1	0.635	-0.635	0.898026	0.414218
2	162	592	219	0	6.06667	2.168	1	0	0.635	0	0.635	0.292897
2	163	592	219	0	6.1	1.533	1	0	0.635	0	0.635	0.41422
2	164	592	220	0.635	6.13333	2.168	1	1	0.635	0.635	0.898026	0.414218
2	165	592	220	0	6.16667	2.168	1	1	0.635	0.635	0.898026	0.414218
2	166	592	220	0	6.2	2.168	1	1	0.635	0.635	0.898026	0.414218
2	167	592	220	0	6.23333	2.168	1	1	0.635	0.635	0.898026	0.414218
2	168	592	220	0	6.26667	2.168	1	1	0.635	0.635	0.898026	0.414218
2	169	592	220	0	6.3	2.168	1	2	0.635	1.27	1.4199	0.654937
2	170	592	220	0	6.33333	1.533	1	2	0.635	1.27	1.4199	0.926225
2	171	592	220	0	6.36667	1.533	1	2	0.635	1.27	1.4199	0.926225
2	172	592	220	0	6.4	1.533	0	1	0	0.635	0.635	0.41422
2	173	592	220	0	6.43333	0.635	0	1	0	0.635	0.635	1
2	174	592	219	0.635	6.46667	1.27	0	0	0	0	0	0
2	175	591	219	0.635	6.5	1.905	-1	0	-0.635	0	0.635	0.333333
2	176	591	218	0.635	6.53333	2.54	-1	-1	-0.635	-0.635	0.898026	0.353553
2	177	591	218	0	6.56667	2.54	-1	-1	-0.635	-0.635	0.898026	0.353553
2	178	590	218	0.635	6.6	3.175	-2	-1	-1.27	-0.635	1.4199	0.447214
2	179	590	218	0	6.63333	3.175	-2	-2	-1.27	-1.27	1.79605	0.565685
2	180	590	218	0	6.66667	2.54	-2	-2	-1.27	-1.27	1.79605	0.707107
2	181	590	218	0	6.7	2.54	-2	-2	-1.27	-1.27	1.79605	0.707107
2	182	590	218	0	6.73333	2.54	-2	-2	-1.27	-1.27	1.79605	0.707107
2	183	590	218	0	6.76667	2.54	-2	-2	-1.27	-1.27	1.79605	0.707107
2	184	590	218	0	6.8	2.54	-2	-2	-1.27	-1.27	1.79605	0.707107
2	185	590	218	0	6.83333	2.54	-2	-2	-1.27	-1.27	1.79605	0.707107
2	186	590	218	0	6.86667	2.54	-2	-2	-1.27	-1.27	1.79605	0.707107
2	187	591	218	0.635	6.9	3.175	-1	-2	-0.635	-1.27	1.4199	0.447214
2	188	591	218	0	6.93333	3.175	-1	-2	-0.635	-1.27	1.4199	0.447214
2	189	591	217	0.635	6.96667	3.81	-1	-2	-0.635	-1.27	1.4199	0.372678
2	190	591	217	0	7	3.175	0	-2	0	-1.27	1.27	0.4
2	191	591	217	0	7.03333	2.54	0	-1	0	-0.635	0.635	0.25
2	192	591	217	0	7.06667	1.905	0	-1	0	-0.635	0.635	0.333333
2	193	591	219	1.27	7.1	3.175	1	1	0.635	0.635	0.898026	0.282843
2	194	590	221	1.42	7.13333	3.96	0	3	0	1.905	1.905	0.481061
2	195	589	223	1.42	7.16667	5.38	-1	5	-0.635	3.175	3.23788	0.601836
2	196	588	224	0.898	7.2	6.278	-2	6	-1.27	3.81	4.01609	0.639709
2	197	588	224	0	7.23333	6.278	-2	6	-1.27	3.81	4.01609	0.639709
2	198	587	224	0.635	7.26667	6.913	-3	6	-1.905	3.81	4.25971	0.616188
2	199	587	224	0	7.3	6.913	-3	6	-1.905	3.81	4.25971	0.616188
2	200	587	224	0	7.33333	6.913	-3	6	-1.905	3.81	4.25971	0.616188
2	201	587	224	0	7.36667	6.913	-3	6	-1.905	3.81	4.25971	0.616188
2	202	587	223	0.635	7.4	7.548	-4	5	-2.54	3.175	4.06598	0.538684
2	203	587	224	0.635	7.43333	7.548	-4	6	-2.54	3.81	4.57905	0.606657
2	204	587	225	0.635	7.46667	8.183	-4	8	-2.54	5.08	5.67961	0.694075
2	205	587	225	0	7.5	7.548	-4	8	-2.54	5.08	5.67961	0.752466
2	206	586	225	0.635	7.53333	8.183	-5	8	-3.175	5.08	5.99058	0.732076
2	207	586	225	0	7.56667	8.183	-5	8	-3.175	5.08	5.99058	0.732076
2	208	586	225	0	7.6	8.183	-5	6	-3.175	3.81	4.95951	0.606075
2	209	586	225	0	7.63333	6.913	-4	4	-2.54	2.54	3.5921	0.519616
2	210	586	226	0.635	7.66667	6.128	-3	3	-1.905	1.905	2.69408	0.439634
2	211	586	227	0.635	7.7	5.343	-2	3	-1.27	1.905	2.28953	0.428509
2	212	585	227	0.635	7.73333	5.08	-3	3	-1.905	1.905	2.69408	0.53033
2	213	585	227	0	7.76667	5.08	-2	3	-1.27	1.905	2.28953	0.450694
2	214	585	227	0	7.8	4.445	-2	3	-1.27	1.905	2.28953	0.515079
2	215	585	227	0	7.83333	4.445	-2	3	-1.27	1.905	2.28953	0.515079
2	216	585	227	0	7.86667	4.445	-2	3	-1.27	1.905	2.28953	0.515079
2	217	585	227	0	7.9	4.445	-2	4	-1.27	2.54	2.83981	0.638877
2	218	585	227	0	7.93333	3.81	-2	3	-1.27	1.905	2.28953	0.600925
2	219	585	227	0	7.96667	3.175	-2	2	-1.27	1.27	1.79605	0.565685
2	220	585	227	0	8	2.54	-2	2	-1.27	1.27	1.79605	0.707107
2	221	584	227	0.635	8.03333	3.175	-2	2	-1.27	1.27	1.79605	0.565685
2	222	584	227	0	8.06667	2.54	-2	2	-1.27	1.27	1.79605	0.707107
2	223	584	226	0.635	8.1	3.175	-2	1	-1.27	0.635	1.4199	0.447214
2	224	583	226	0.635	8.13333	3.81	-3	1	-1.905	0.635	2.00805	0.527046
2	225	583	226	0	8.16667	3.81	-3	0	-1.905	0	1.905	0.5
2	226	583	226	0	8.2	3.175	-3	-1	-1.905	-0.635	2.00805	0.632456
2	227	583	228	1.27	8.23333	3.81	-2	1	-1.27	0.635	1.4199	0.372678
2	228	583	228	0	8.26667	3.175	-2	1	-1.27	0.635	1.4199	0.447214
2	229	583	229	0.635	8.3	3.81	-2	2	-1.27	1.27	1.79605	0.471405
2	230	583	229	0	8.33333	3.81	-2	2	-1.27	1.27	1.79605	0.471405
2	231	583	229	0	8.36667	3.81	-2	2	-1.27	1.27	1.79605	0.471405
2	232	583	229	0	8.4	3.81	-2	2	-1.27	1.27	1.79605	0.471405
2	233	582	230	0.898	8.43333	4.708	-3	3	-1.905	1.905	2.69408	0.572234
2	234	582	230	0	8.46667	4.708	-3	3	-1.905	1.905	2.69408	0.572234
2	235	580	227	2.29	8.5	6.998	-5	0	-3.175	0	3.175	0.453701
2	236	579	228	0.898	8.53333	7.896	-5	1	-3.175	0.635	3.23788	0.410066
2	237	578	227	0.898	8.56667	8.159	-6	0	-3.81	0	3.81	0.466969
2	238	579	227	0.635	8.6	8.794	-5	1	-3.175	0.635	3.23788	0.368192
2	239	579	227	0	8.63333	8.159	-4	1	-2.54	0.635	2.61817	0.320894
2	240	579	227	0	8.66667	7.524	-4	1	-2.54	0.635	2.61817	0.347976
2	241	579	227	0	8.7	7.524	-4	1	-2.54	0.635	2.61817	0.347976
2	242	579	227	0	8.73333	7.524	-4	-1	-2.54	-0.635	2.61817	0.347976
2	243	578	227	0.635	8.76667	6.889	-5	-1	-3.175	-0.635	3.23788	0.470007
2	244	578	226	0.635	8.8	7.524	-5	-3	-3.175	-1.905	3.70265	0.492113
2	245	578	226	0	8.83333	6.889	-5	-3	-3.175	-1.905	3.70265	0.537473
2	246	578	225	0.635	8.86667	7.524	-5	-4	-3.175	-2.54	4.06598	0.540402
2	247	578	225	0	8.9	7.524	-5	-4	-3.175	-2.54	4.06598	0.540402
2	248	578	225	0	8.93333	7.524	-4	-5	-2.54	-3.175	4.06598	0.540402
2	249	578	224	0.635	8.96667	7.261	-4	-6	-2.54	-3.81	4.57905	0.630636
2	250	578	224	0	9	7.261	-2	-3	-1.27	-1.905	2.28953	0.315318
2	251	578	224	0	9.03333	4.971	-1	-4	-0.635	-2.54	2.61817	0.526689
2	252	578	224	0	9.06667	4.073	0	-3	0	-1.905	1.905	0.467714
2	253	579	224	0.635	9.1	3.81	0	-3	0	-1.905	1.905	0.5
2	254	579	224	0	9.13333	3.175	0	-3	0	-1.905	1.905	0.6
2	255	579	224	0	9.16667	3.175	0	-3	0	-1.905	1.905	0.6
2	256	578	225	0.898	9.2	4.073	-1	-2	-0.635	-1.27	1.4199	0.348614
2	257	578	226	0.635	9.23333	4.708	-1	-1	-0.635	-0.635	0.898026	0.190745
2	258	577	226	0.635	9.26667	5.343	-1	-1	-0.635	-0.635	0.898026	0.168075
2	259	577	226	0	9.3	4.708	-1	0	-0.635	0	0.635	0.134877
2	260	577	226	0	9.33333	4.073	-1	0	-0.635	0	0.635	0.155905
2	261	577	226	0	9.36667	4.073	-1	1	-0.635	0.635	0.898026	0.220483
2	262	577	226	0	9.4	3.438	-1	1	-0.635	0.635	0.898026	0.261206
2	263	577	226	0	9.43333	3.438	-1	1	-0.635	0.635	0.898026	0.261206
2	264	577	226	0	9.46667	3.438	-1	2	-0.635	1.27	1.4199	0.413003
2	265	577	226	0	9.5	2.803	-1	2	-0.635	1.27	1.4199	0.506566
2	266	576	226	0.635	9.53333	3.438	-2	2	-1.27	1.27	1.79605	0.522412
2	267	574	225	1.42	9.56667	4.858	-4	1	-2.54	0.635	2.61817	0.53894
2	268	574	225	0	9.6	4.858	-5	1	-3.175	0.635	3.23788	0.666504
2	269	573	224	0.898	9.63333	5.121	-6	0	-3.81	0	3.81	0.743995
2	270	572	224	0.635	9.66667	5.756	-7	0	-4.445	0	4.445	0.772238
2	271	572	224	0	9.7	5.756	-6	-1	-3.81	-0.635	3.86255	0.671048
2	272	572	224	0	9.73333	4.858	-6	-2	-3.81	-1.27	4.01609	0.826697
2	273	572	224	0	9.76667	4.223	-5	-2	-3.175	-1.27	3.41958	0.809751
2	274	572	224	0	9.8	3.588	-5	-2	-3.175	-1.27	3.41958	0.95306
2	275	572	225	0.635	9.83333	4.223	-5	-1	-3.175	-0.635	3.23788	0.766724
2	276	572	225	0	9.86667	4.223	-5	-1	-3.175	-0.635	3.23788	0.766724
2	277	571	225	0.635	9.9	4.858	-6	-1	-3.81	-0.635	3.86255	0.795091
2	278	570	225	0.635	9.93333	5.493	-7	-1	-4.445	-0.635	4.49013	0.817427
2	279	568	227	1.796	9.96667	7.289	-9	1	-5.715	0.635	5.75017	0.788883
2	280	568	227	0	10	7.289	-9	1	-5.715	0.635	5.75017	0.788883
2	281	567	227	0.635	10.0333	7.924	-9	1	-5.715	0.635	5.75017	0.725665
2	282	566	227	0.635	10.0667	7.924	-8	2	-5.08	1.27	5.23634	0.660821
2	283	565	227	0.635	10.1	7.139	-9	2	-5.715	1.27	5.85441	0.82006
2	284	563	227	1.27	10.1333	8.409	-10	3	-6.35	1.905	6.62959	0.788393
2	285	563	227	0	10.1667	7.511	-9	3	-5.715	1.905	6.02414	0.802042
2	286	563	226	0.635	10.2	7.511	-9	2	-5.715	1.27	5.85441	0.779445
2	287	563	226	0	10.2333	7.511	-9	2	-5.715	1.27	5.85441	0.779445
2	288	562	226	0.635	10.2667	8.146	-10	2	-6.35	1.27	6.47575	0.794961
2	289	562	226	0	10.3	8.146	-10	2	-6.35	1.27	6.47575	0.794961
2	290	562	226	0	10.3333	8.146	-10	1	-6.35	0.635	6.38167	0.783412
2	291	562	226	0	10.3667	7.511	-10	1	-6.35	0.635	6.38167	0.849643
2	292	562	226	0	10.4	7.511	-9	1	-5.715	0.635	5.75017	0.765566
2	293	562	226	0	10.4333	6.876	-8	1	-5.08	0.635	5.11953	0.744551
2	294	562	227	0.635	10.4667	6.876	-6	0	-3.81	0	3.81	0.554101
2	295	562	227	0	10.5	5.08	-6	0	-3.81	0	3.81	0.75
2	296	562	227	0	10.5333	5.08	-5	0	-3.175	0	3.175	0.625
2	297	562	229	1.27	10.5667	5.715	-4	2	-2.54	1.27	2.83981	0.496904
2	298	563	230	0.898	10.6	5.978	-2	3	-1.27	1.905	2.28953	0.382992
2	299	563	230	0	10.6333	5.343	0	3	0	1.905	1.905	0.356541
2	300	564	230	0.635	10.6667	4.708	1	3	0.635	1.905	2.00805	0.426518
2	301	565	230	0.635	10.7	5.343	2	4	1.27	2.54	2.83981	0.5315
2	302	565	230	0	10.7333	4.708	2	4	1.27	2.54	2.83981	0.603187
2	303	565	232	1.27	10.7667	5.978	3	6	1.905	3.81	4.25971	0.712564
2	304	565	232	0	10.8	5.343	3	6	1.905	3.81	4.25971	0.797251
2	305	565	232	0	10.8333	5.343	3	6	1.905	3.81	4.25971	0.797251
2	306	565	234	1.27	10.8667	6.613	3	8	1.905	5.08	5.42544	0.820421
2	307	565	234	0	10.9	6.613	3	8	1.905	5.08	5.42544	0.820421
2	308	565	234	0	10.9333	6.613	3	8	1.905	5.08	5.42544	0.820421
2	309	565	234	0	10.9667	6.613	3	7	1.905	4.445	4.83602	0.731289
2	310	565	234	0	11	5.978	3	7	1.905	4.445	4.83602	0.808969
3	10	671	885	0	1	NA	NA	NA	NA	NA	NA	NA
3	11	671	884	0.635	1.03333	NA	NA	NA	NA	NA	NA	NA
3	12	672	883	0.898	1.06667	NA	NA	NA	NA	NA	NA	NA
3	13	671	883	0.635	1.1	NA	NA	NA	NA	NA	NA	NA
3	14	671	883	0	1.13333	NA	NA	NA	NA	NA	NA	NA
3	15	673	888	3.42	1.16667	NA	NA	NA	NA	NA	NA	NA
3	16	673	888	0	1.2	NA	NA	NA	NA	NA	NA	NA
3	17	674	888	0.635	1.23333	NA	NA	NA	NA	NA	NA	NA
3	18	675	888	0.635	1.26667	NA	NA	NA	NA	NA	NA	NA
3	19	675	888	0	1.3	NA	NA	NA	NA	NA	NA	NA
3	20	676	888	0.635	1.33333	NA	NA	NA	NA	NA	NA	NA
3	21	676	888	0	1.36667	NA	NA	NA	NA	NA	NA	NA
3	22	676	888	0	1.4	NA	NA	NA	NA	NA	NA	NA
3	23	676	888	0	1.43333	NA	NA	NA	NA	NA	NA	NA
3	24	676	887	0.635	1.46667	NA	NA	NA	NA	NA	NA	NA
3	25	676	887	0	1.5	8.128	5	2	3.175	1.27	3.41958	0.420716
3	26	676	886	0.635	1.53333	8.763	5	2	3.175	1.27	3.41958	0.390229
3	27	676	886	0	1.56667	8.128	4	3	2.54	1.905	3.175	0.390625
3	28	676	885	0.635	1.6	7.865	5	2	3.175	1.27	3.41958	0.434784
3	29	676	884	0.635	1.63333	7.865	5	1	3.175	0.635	3.23788	0.411682
3	30	676	885	0.635	1.66667	8.5	3	-3	1.905	-1.905	2.69408	0.31695
3	31	676	884	0.635	1.7	5.715	3	-4	1.905	-2.54	3.175	0.555556
3	32	676	885	0.635	1.73333	6.35	2	-3	1.27	-1.905	2.28953	0.360555
3	33	677	884	0.898	1.76667	6.613	2	-4	1.27	-2.54	2.83981	0.429428
3	34	679	884	1.27	1.8	7.248	4	-4	2.54	-2.54	3.5921	0.495599
3	35	682	885	2.008	1.83333	9.256	6	-3	3.81	-1.905	4.25971	0.460211
3	36	682	886	0.635	1.86667	9.256	6	-2	3.81	-1.27	4.01609	0.433891
3	37	683	886	0.635	1.9	9.891	7	-2	4.445	-1.27	4.62287	0.467381
3	38	685	886	1.27	1.93333	11.161	9	-2	5.715	-1.27	5.85441	0.524542
3	39	686	886	0.635	1.96667	11.796	10	-1	6.35	-0.635	6.38167	0.541003
3	40	686	886	0	2	11.161	10	-1	6.35	-0.635	6.38167	0.571783
3	41	686	886	0	2.03333	11.161	10	0	6.35	0	6.35	0.568945
3	42	685	884	1.42	2.06667	11.946	9	-2	5.715	-1.27	5.85441	0.490073
3	43	685	884	0	2.1	11.946	9	-1	5.715	-0.635	5.75017	0.481347
3	44	685	883	0.635	2.13333	11.946	9	-1	5.715	-0.635	5.75017	0.481347
3	45	685	883	0	2.16667	11.311	9	-2	5.715	-1.27	5.85441	0.517586
3	46	685	883	0	2.2	10.676	9	-1	5.715	-0.635	5.75017	0.538607
3	47	685	884	0.635	2.23333	10.676	9	-1	5.715	-0.635	5.75017	0.538607
3	48	684	884	0.635	2.26667	10.676	7	0	4.445	0	4.445	0.416354
3	49	684	884	0	2.3	9.778	5	0	3.175	0	3.175	0.324709
3	50	683	885	0.898	2.33333	9.406	1	0	0.635	0	0.635	0.0675101
3	51	683	886	0.635	2.36667	8.033	1	0	0.635	0	0.635	0.0790489
3	52	685	886	1.27	2.4	8.668	2	0	1.27	0	1.27	0.146516
3	53	686	886	0.635	2.43333	8.668	1	0	0.635	0	0.635	0.073258
3	54	687	886	0.635	2.46667	8.033	1	0	0.635	0	0.635	0.0790489
3	55	686	886	0.635	2.5	8.033	0	0	0	0	0	0
3	56	685	885	0.898	2.53333	8.931	-1	-1	-0.635	-0.635	0.898026	0.100552
3	57	684	885	0.635	2.56667	9.566	-1	1	-0.635	0.635	0.898026	0.0938768
3	58	684	885	0	2.6	8.146	-1	1	-0.635	0.635	0.898026	0.110241
3	59	684	885	0	2.63333	8.146	-1	2	-0.635	1.27	1.4199	0.174307
3	60	683	885	0.635	2.66667	8.146	-2	2	-1.27	1.27	1.79605	0.220483
3	61	683	885	0	2.7	8.146	-2	2	-1.27	1.27	1.79605	0.220483
3	62	683	885	0	2.73333	8.146	-2	1	-1.27	0.635	1.4199	0.174307
3	63	682	885	0.635	2.76667	8.146	-2	1	-1.27	0.635	1.4199	0.174307
3	64	682	885	0	2.8	7.511	-2	1	-1.27	0.635	1.4199	0.189043
3	65	681	885	0.635	2.83333	8.146	-2	0	-1.27	0	1.27	0.155905
3	66	681	885	0	2.86667	7.248	-2	-1	-1.27	-0.635	1.4199	0.195903
3	67	681	885	0	2.9	6.613	-4	-1	-2.54	-0.635	2.61817	0.395913
3	68	681	885	0	2.93333	5.343	-5	-1	-3.175	-0.635	3.23788	0.606004
3	69	681	885	0	2.96667	4.708	-6	-1	-3.81	-0.635	3.86255	0.820424
3	70	681	885	0	3	4.073	-5	-1	-3.175	-0.635	3.23788	0.794961
3	71	681	885	0	3.03333	3.438	-4	0	-2.54	0	2.54	0.738802
3	72	681	885	0	3.06667	2.54	-3	0	-1.905	0	1.905	0.75
3	73	680	885	0.635	3.1	2.54	-4	0	-2.54	0	2.54	1
3	74	680	883	1.27	3.13333	3.81	-4	-2	-2.54	-1.27	2.83981	0.745356
3	75	680	882	0.635	3.16667	4.445	-3	-3	-1.905	-1.905	2.69408	0.606092
3	76	679	879	2.008	3.2	5.818	-4	-6	-2.54	-3.81	4.57905	0.787049
3	77	677	877	1.796	3.23333	7.614	-6	-8	-3.81	-5.08	6.35	0.83399
3	78	673	872	4.066	3.26667	11.68	-9	-13	-5.715	-8.255	10.0402	0.859609
3	79	673	873	0.635	3.3	11.68	-9	-12	-5.715	-7.62	9.525	0.815497
3	80	672	870	2.008	3.33333	13.688	-9	-15	-5.715	-9.525	11.108	0.811511
3	81	673	867	2.008	3.36667	15.061	-8	-18	-5.08	-11.43	12.508	0.830493
3	82	670	863	3.175	3.4	18.236	-11	-22	-6.985	-13.97	15.6189	0.856489
3	83	668	861	1.796	3.43333	20.032	-13	-24	-8.255	-15.24	17.3321	0.865222
3	84	667	859	1.42	3.46667	21.452	-14	-26	-8.89	-16.51	18.7513	0.874106
3	85	668	858	0.898	3.5	22.35	-13	-27	-8.255	-17.145	19.0288	0.851401
3	86	669	860	1.42	3.53333	23.77	-12	-25	-7.62	-15.875	17.6091	0.740811
3	87	664	855	4.49	3.56667	28.26	-17	-30	-10.795	-19.05	21.896	0.774805
3	88	662	853	1.796	3.6	30.056	-18	-32	-11.43	-20.32	23.3141	0.775689
3	89	662	852	0.635	3.63333	30.056	-18	-31	-11.43	-19.685	22.7628	0.757346
3	90	662	835	10.795	3.66667	39.581	-18	-47	-11.43	-29.845	31.9589	0.807429
3	91	661	833	1.42	3.7	40.366	-18	-46	-11.43	-29.21	31.3667	0.777057
3	92	666	830	3.703	3.73333	42.061	-11	-47	-6.985	-29.845	30.6515	0.728739
3	93	666	827	1.905	3.76667	42.17	-7	-45	-4.445	-28.575	28.9187	0.685764
3	94	666	823	2.54	3.8	40.644	-7	-50	-4.445	-31.75	32.0596	0.788791
3	95	666	821	1.27	3.83333	41.279	-6	-49	-3.81	-31.115	31.3474	0.759403
3	96	666	820	0.635	3.86667	39.906	-7	-47	-4.445	-29.845	30.1742	0.756132
3	97	666	819	0.635	3.9	38.533	-4	-44	-2.54	-27.94	28.0552	0.728083
3	98	659	817	4.623	3.93333	39.981	-9	-44	-5.715	-27.94	28.5185	0.713301
3	99	653	815	4.016	3.96667	42.201	-14	-44	-8.89	-27.94	29.3202	0.694776
3	100	651	814	1.42	4	42.201	-17	-44	-10.795	-27.94	29.9529	0.709767
3	101	651	808	3.81	4.03333	45.113	-18	-52	-11.43	-33.02	34.9423	0.774551
3	102	651	804	2.54	4.06667	46.233	-13	-51	-8.255	-32.385	33.4206	0.722872
3	103	652	797	4.49	4.1	46.233	-10	-56	-6.35	-35.56	36.1225	0.781315
3	104	653	791	3.863	4.13333	48.3	-9	-61	-5.715	-38.735	39.1543	0.810649
3	105	656	789	2.29	4.16667	49.955	-6	-46	-3.81	-29.21	29.4574	0.589679
3	106	657	789	0.635	4.2	39.795	-4	-44	-2.54	-27.94	28.0552	0.704994
3	107	658	789	0.635	4.23333	39.01	-8	-41	-5.08	-26.035	26.526	0.679979
3	108	659	789	0.635	4.26667	35.942	-7	-38	-4.445	-24.13	24.536	0.682655
3	109	660	787	1.42	4.3	35.457	-6	-36	-3.81	-22.86	23.1753	0.653618
3	110	660	785	1.27	4.33333	34.187	-6	-36	-3.81	-22.86	23.1753	0.677899
3	111	660	785	0	4.36667	32.917	-6	-35	-3.81	-22.225	22.5492	0.685032
3	112	660	784	0.635	4.4	32.917	-6	-35	-3.81	-22.225	22.5492	0.685032
3	113	660	782	1.27	4.43333	33.552	1	-35	0.635	-22.225	22.2341	0.662675
3	114	661	782	0.635	4.46667	29.564	8	-33	5.08	-20.955	21.562	0.729332
3	115	661	782	0	4.5	25.548	10	-32	6.35	-20.32	21.2891	0.833297
3	116	661	783	0.635	4.53333	24.763	10	-25	6.35	-15.875	17.0979	0.690462
3	117	664	783	1.905	4.56667	22.858	13	-21	8.255	-13.335	15.6833	0.686121
3	118	665	781	1.42	4.6	21.738	13	-16	8.255	-10.16	13.0909	0.602211
3	119	666	779	1.42	4.63333	18.668	13	-12	8.255	-7.62	11.2343	0.601794
3	120	665	774	3.238	4.66667	18.043	9	-15	5.715	-9.525	11.108	0.615638
3	121	664	771	2.008	4.7	17.761	7	-18	4.445	-11.43	12.2639	0.690495
3	122	664	767	2.54	4.73333	19.666	6	-22	3.81	-13.97	14.4802	0.736308
3	123	664	764	1.905	4.76667	20.936	5	-25	3.175	-15.875	16.1894	0.77328
3	124	666	760	2.84	4.8	23.141	6	-27	3.81	-17.145	17.5632	0.758966
3	125	667	759	0.898	4.83333	22.619	7	-26	4.445	-16.51	17.0979	0.755909
3	126	667	759	0	4.86667	21.349	7	-26	4.445	-16.51	17.0979	0.800876
3	127	668	758	0.898	4.9	22.247	8	-26	5.08	-16.51	17.2739	0.776458
3	128	669	757	0.898	4.93333	22.51	9	-25	5.715	-15.875	16.8724	0.74955
3	129	668	756	0.898	4.96667	22.138	7	-26	4.445	-16.51	17.0979	0.772333
3	130	668	755	0.635	5	22.138	7	-27	4.445	-17.145	17.7118	0.800065
3	131	663	753	3.42	5.03333	25.558	2	-30	1.27	-19.05	19.0923	0.747018
3	132	663	753	0	5.06667	24.923	-1	-30	-0.635	-19.05	19.0606	0.764779
3	133	663	749	2.54	5.1	25.558	-2	-32	-1.27	-20.32	20.3596	0.796606
3	134	662	748	0.898	5.13333	25.036	-4	-31	-2.54	-19.685	19.8482	0.792786
3	135	661	748	0.635	5.16667	24.251	-4	-26	-2.54	-16.51	16.7042	0.688806
3	136	660	748	0.635	5.2	21.648	-4	-23	-2.54	-14.605	14.8242	0.684785
3	137	660	747	0.635	5.23333	20.275	-4	-20	-2.54	-12.7	12.9515	0.638792
3	138	660	747	0	5.26667	17.735	-4	-17	-2.54	-10.795	11.0898	0.625306
3	139	660	747	0	5.3	15.83	-6	-13	-3.81	-8.255	9.09182	0.574341
3	140	660	747	0	5.33333	12.99	-7	-12	-4.445	-7.62	8.8217	0.679115
3	141	660	747	0	5.36667	12.092	-7	-12	-4.445	-7.62	8.8217	0.729549
3	142	660	747	0	5.4	12.092	-8	-11	-5.08	-6.985	8.63693	0.714268
3	143	660	747	0	5.43333	11.194	-9	-10	-5.715	-6.35	8.54305	0.763181
3	144	660	747	0	5.46667	10.296	-8	-9	-5.08	-5.715	7.64641	0.742659
3	145	660	747	0	5.5	9.398	-8	-8	-5.08	-5.08	7.1842	0.76444
3	146	661	747	0.635	5.53333	9.398	-2	-6	-1.27	-3.81	4.01609	0.427335
3	147	661	747	0	5.56667	5.978	-2	-6	-1.27	-3.81	4.01609	0.671812
3	148	662	747	0.635	5.6	6.613	-1	-2	-0.635	-1.27	1.4199	0.214714
3	149	662	747	0	5.63333	4.073	0	-1	0	-0.635	0.635	0.155905
3	150	662	747	0	5.66667	3.175	1	-1	0.635	-0.635	0.898026	0.282843
3	151	662	747	0	5.7	2.54	2	-1	1.27	-0.635	1.4199	0.559017
3	152	664	748	1.42	5.73333	3.325	4	1	2.54	0.635	2.61817	0.78742
3	153	664	747	0.635	5.76667	3.325	4	0	2.54	0	2.54	0.76391
3	154	664	747	0	5.8	3.325	4	0	2.54	0	2.54	0.76391
3	155	664	747	0	5.83333	3.325	4	0	2.54	0	2.54	0.76391
3	156	664	747	0	5.86667	3.325	4	0	2.54	0	2.54	0.76391
3	157	665	746	0.898	5.9	4.223	5	-1	3.175	-0.635	3.23788	0.766724
3	158	666	746	0.635	5.93333	4.858	6	-1	3.81	-0.635	3.86255	0.795091
3	159	666	746	0	5.96667	4.858	6	-1	3.81	-0.635	3.86255	0.795091
3	160	666	748	1.27	6	6.128	6	1	3.81	0.635	3.86255	0.630312
3	161	666	749	0.635	6.03333	6.763	5	2	3.175	1.27	3.41958	0.505631
3	162	665	750	0.898	6.06667	7.026	4	3	2.54	1.905	3.175	0.451893
3	163	664	750	0.635	6.1	7.661	2	3	1.27	1.905	2.28953	0.298855
3	164	664	751	0.635	6.13333	7.661	2	4	1.27	2.54	2.83981	0.370684
3	165	664	751	0	6.16667	7.661	2	4	1.27	2.54	2.83981	0.370684
3	166	664	751	0	6.2	7.661	2	4	1.27	2.54	2.83981	0.370684
3	167	664	751	0	6.23333	7.661	0	3	0	1.905	1.905	0.248662
3	168	664	751	0	6.26667	6.241	0	4	0	2.54	2.54	0.406986
3	169	664	751	0	6.3	5.606	0	4	0	2.54	2.54	0.453086
3	170	664	751	0	6.33333	5.606	0	4	0	2.54	2.54	0.453086
3	171	664	751	0	6.36667	5.606	0	4	0	2.54	2.54	0.453086
3	172	664	751	0	6.4	5.606	-1	5	-0.635	3.175	3.23788	0.577574
3	173	663	751	0.635	6.43333	5.343	-3	5	-1.905	3.175	3.70265	0.692992
3	174	663	751	0	6.46667	4.708	-3	5	-1.905	3.175	3.70265	0.78646
3	175	668	755	4.066	6.5	8.774	2	7	1.27	4.445	4.62287	0.526883
3	176	668	755	0	6.53333	7.504	2	6	1.27	3.81	4.01609	0.535194
3	177	668	755	0	6.56667	6.869	3	5	1.905	3.175	3.70265	0.539038
3	178	668	755	0	6.6	5.971	4	5	2.54	3.175	4.06598	0.680955
3	179	668	755	0	6.63333	5.336	4	4	2.54	2.54	3.5921	0.673183
3	180	668	755	0	6.66667	4.701	4	4	2.54	2.54	3.5921	0.764115
3	181	667	754	0.898	6.7	5.599	3	3	1.905	1.905	2.69408	0.481171
3	182	667	754	0	6.73333	5.599	3	3	1.905	1.905	2.69408	0.481171
3	183	666	753	0.898	6.76667	6.497	2	2	1.27	1.27	1.79605	0.276443
3	184	666	753	0	6.8	6.497	2	2	1.27	1.27	1.79605	0.276443
3	185	666	753	0	6.83333	6.497	2	2	1.27	1.27	1.79605	0.276443
3	186	666	753	0	6.86667	6.497	2	2	1.27	1.27	1.79605	0.276443
3	187	666	752	0.635	6.9	7.132	2	1	1.27	0.635	1.4199	0.199089
3	188	666	752	0	6.93333	7.132	3	1	1.905	0.635	2.00805	0.281554
3	189	666	752	0	6.96667	6.497	3	1	1.905	0.635	2.00805	0.309073
3	190	666	752	0	7	6.497	-2	-3	-1.27	-1.905	2.28953	0.352397
3	191	666	752	0	7.03333	2.431	-2	-3	-1.27	-1.905	2.28953	0.941804
3	192	666	752	0	7.06667	2.431	-2	-3	-1.27	-1.905	2.28953	0.941804
3	193	666	752	0	7.1	2.431	-2	-3	-1.27	-1.905	2.28953	0.941804
3	194	666	752	0	7.13333	2.431	-2	-3	-1.27	-1.905	2.28953	0.941804
3	195	666	750	1.27	7.16667	3.701	-2	-5	-1.27	-3.175	3.41958	0.923961
3	196	666	749	0.635	7.2	4.336	-1	-5	-0.635	-3.175	3.23788	0.746743
3	197	666	748	0.635	7.23333	4.073	-1	-6	-0.635	-3.81	3.86255	0.948332
3	198	666	749	0.635	7.26667	4.708	0	-4	0	-2.54	2.54	0.539507
3	199	668	749	1.27	7.3	5.08	2	-4	1.27	-2.54	2.83981	0.559017
3	200	668	747	1.27	7.33333	6.35	2	-6	1.27	-3.81	4.01609	0.632456
3	201	668	747	0	7.36667	6.35	2	-6	1.27	-3.81	4.01609	0.632456
3	202	668	747	0	7.4	6.35	2	-5	1.27	-3.175	3.41958	0.538516
3	203	669	747	0.635	7.43333	6.35	3	-5	1.905	-3.175	3.70265	0.583095
3	204	670	746	0.898	7.46667	7.248	4	-6	2.54	-3.81	4.57905	0.631767
3	205	670	746	0	7.5	7.248	4	-6	2.54	-3.81	4.57905	0.631767
3	206	670	746	0	7.53333	7.248	4	-6	2.54	-3.81	4.57905	0.631767
3	207	670	746	0	7.56667	7.248	4	-6	2.54	-3.81	4.57905	0.631767
3	208	671	746	0.635	7.6	7.883	5	-6	3.175	-3.81	4.95951	0.62914
3	209	671	746	0	7.63333	7.883	5	-6	3.175	-3.81	4.95951	0.62914
3	210	673	745	1.42	7.66667	9.303	7	-5	4.445	-3.175	5.46248	0.587174
3	211	673	744	0.635	7.7	8.668	7	-5	4.445	-3.175	5.46248	0.630189
3	212	674	743	0.898	7.73333	8.931	8	-5	5.08	-3.175	5.99058	0.670762
3	213	676	742	1.42	7.76667	9.716	10	-7	6.35	-4.445	7.75116	0.797773
3	214	676	742	0	7.8	9.081	8	-7	5.08	-4.445	6.75014	0.743326
3	215	676	744	1.27	7.83333	9.081	8	-3	5.08	-1.905	5.42544	0.59745
3	216	676	744	0	7.86667	7.811	8	-3	5.08	-1.905	5.42544	0.69459
3	217	676	744	0	7.9	7.811	8	-3	5.08	-1.905	5.42544	0.69459
3	218	676	746	1.27	7.93333	9.081	7	-1	4.445	-0.635	4.49013	0.494453
3	219	676	746	0	7.96667	8.446	6	0	3.81	0	3.81	0.451101
3	220	676	746	0	8	7.548	6	0	3.81	0	3.81	0.504769
3	221	676	746	0	8.03333	7.548	6	0	3.81	0	3.81	0.504769
3	222	677	745	0.898	8.06667	8.446	7	-1	4.445	-0.635	4.49013	0.531628
3	223	678	743	1.42	8.1	9.866	7	-3	4.445	-1.905	4.83602	0.49017
3	224	680	743	1.27	8.13333	10.501	9	-3	5.715	-1.905	6.02414	0.573673
3	225	680	743	0	8.16667	10.501	7	-2	4.445	-1.27	4.62287	0.440231
3	226	680	743	0	8.2	9.081	7	-1	4.445	-0.635	4.49013	0.494453
3	227	680	743	0	8.23333	8.446	6	0	3.81	0	3.81	0.451101
3	228	680	743	0	8.26667	7.548	4	1	2.54	0.635	2.61817	0.34687
3	229	684	744	2.618	8.3	8.746	8	2	5.08	1.27	5.23634	0.598713
3	230	684	744	0	8.33333	8.746	8	0	5.08	0	5.08	0.580837
3	231	685	743	0.898	8.36667	8.374	9	-1	5.715	-0.635	5.75017	0.686669
3	232	687	742	1.42	8.4	9.794	11	-2	6.985	-1.27	7.09952	0.724884
3	233	687	741	0.635	8.43333	10.429	11	-5	6.985	-3.175	7.67273	0.735711
3	234	687	741	0	8.46667	9.159	11	-5	6.985	-3.175	7.67273	0.837726
3	235	687	739	1.27	8.5	10.429	11	-7	6.985	-4.445	8.27939	0.793881
3	236	686	739	0.635	8.53333	11.064	10	-7	6.35	-4.445	7.75116	0.700575
3	237	686	739	0	8.56667	11.064	9	-6	5.715	-3.81	6.86858	0.620804
3	238	686	739	0	8.6	10.166	8	-4	5.08	-2.54	5.67961	0.558687
3	239	687	739	0.635	8.63333	9.381	7	-4	4.445	-2.54	5.11953	0.545734
3	240	687	738	0.635	8.66667	8.746	7	-5	4.445	-3.175	5.46248	0.624569
3	241	687	738	0	8.7	8.746	7	-5	4.445	-3.175	5.46248	0.624569
3	242	687	738	0	8.73333	8.746	7	-5	4.445	-3.175	5.46248	0.624569
3	243	688	739	0.898	8.76667	9.644	8	-4	5.08	-2.54	5.67961	0.588927
3	244	688	739	0	8.8	9.644	4	-5	2.54	-3.175	4.06598	0.421608
3	245	688	739	0	8.83333	7.026	4	-5	2.54	-3.175	4.06598	0.578705
3	246	688	739	0	8.86667	7.026	3	-4	1.905	-2.54	3.175	0.451893
3	247	688	739	0	8.9	6.128	1	-3	0.635	-1.905	2.00805	0.327684
3	248	688	739	0	8.93333	4.708	1	-2	0.635	-1.27	1.4199	0.301594
3	249	688	740	0.635	8.96667	4.708	1	-1	0.635	-0.635	0.898026	0.190745
3	250	688	740	0	9	4.708	1	1	0.635	0.635	0.898026	0.190745
3	251	688	740	0	9.03333	3.438	2	1	1.27	0.635	1.4199	0.413003
3	252	688	741	0.635	9.06667	3.438	2	2	1.27	1.27	1.79605	0.522412
3	253	688	741	0	9.1	3.438	2	2	1.27	1.27	1.79605	0.522412
3	254	688	742	0.635	9.13333	4.073	1	3	0.635	1.905	2.00805	0.493014
3	255	688	742	0	9.16667	3.438	1	4	0.635	2.54	2.61817	0.761539
3	256	688	742	0	9.2	2.803	1	4	0.635	2.54	2.61817	0.934061
3	257	688	742	0	9.23333	2.803	1	4	0.635	2.54	2.61817	0.934061
3	258	690	744	1.796	9.26667	4.599	2	5	1.27	3.175	3.41958	0.743549
3	259	690	744	0	9.3	3.701	2	5	1.27	3.175	3.41958	0.923961
3	260	690	744	0	9.33333	3.701	2	5	1.27	3.175	3.41958	0.923961
3	261	691	744	0.635	9.36667	4.336	3	5	1.905	3.175	3.70265	0.853933
3	262	692	744	0.635	9.4	4.971	4	5	2.54	3.175	4.06598	0.817941
3	263	692	744	0	9.43333	4.971	4	5	2.54	3.175	4.06598	0.817941
3	264	692	744	0	9.46667	4.971	4	4	2.54	2.54	3.5921	0.722612
3	265	692	743	0.635	9.5	4.971	4	3	2.54	1.905	3.175	0.638704
3	266	694	742	1.42	9.53333	6.391	6	2	3.81	1.27	4.01609	0.628398
3	267	694	742	0	9.56667	6.391	6	1	3.81	0.635	3.86255	0.604374
3	268	694	742	0	9.6	5.756	6	1	3.81	0.635	3.86255	0.671048
3	269	694	742	0	9.63333	5.756	6	0	3.81	0	3.81	0.661918
3	270	694	741	0.635	9.66667	5.756	6	-1	3.81	-0.635	3.86255	0.671048
3	271	694	741	0	9.7	5.756	6	-1	3.81	-0.635	3.86255	0.671048
3	272	693	741	0.635	9.73333	6.391	5	-1	3.175	-0.635	3.23788	0.506631
3	273	693	741	0	9.76667	6.391	3	-3	1.905	-1.905	2.69408	0.421542
3	274	694	740	0.898	9.8	5.493	4	-4	2.54	-2.54	3.5921	0.653942
3	275	693	739	0.898	9.83333	6.391	3	-5	1.905	-3.175	3.70265	0.579354
3	276	693	739	0	9.86667	6.391	2	-5	1.27	-3.175	3.41958	0.535062
3	277	694	740	0.898	9.9	6.654	2	-4	1.27	-2.54	2.83981	0.426782
3	278	694	740	0	9.93333	6.019	2	-4	1.27	-2.54	2.83981	0.471807
3	279	694	739	0.635	9.96667	6.654	2	-5	1.27	-3.175	3.41958	0.513913
3	280	694	739	0	10	6.654	2	-4	1.27	-2.54	2.83981	0.426782
3	281	694	739	0	10.0333	6.019	0	-3	0	-1.905	1.905	0.316498
3	282	694	739	0	10.0667	4.599	0	-3	0	-1.905	1.905	0.41422
3	283	694	739	0	10.1	4.599	0	-3	0	-1.905	1.905	0.41422
3	284	694	739	0	10.1333	4.599	0	-3	0	-1.905	1.905	0.41422
3	285	695	740	0.898	10.1667	5.497	1	-1	0.635	-0.635	0.898026	0.163366
3	286	695	740	0	10.2	4.862	1	-1	0.635	-0.635	0.898026	0.184703
3	287	695	740	0	10.2333	4.862	2	-1	1.27	-0.635	1.4199	0.292041
3	288	695	740	0	10.2667	4.227	2	-1	1.27	-0.635	1.4199	0.335913
3	289	693	743	2.29	10.3	6.517	-1	3	-0.635	1.905	2.00805	0.308124
3	290	693	743	0	10.3333	5.619	0	4	0	2.54	2.54	0.452038
3	291	693	743	0	10.3667	4.721	0	4	0	2.54	2.54	0.538022
3	292	693	743	0	10.4	4.721	-1	3	-0.635	1.905	2.00805	0.425343
3	293	693	743	0	10.4333	3.823	-1	3	-0.635	1.905	2.00805	0.525254
3	294	693	743	0	10.4667	3.823	-1	4	-0.635	2.54	2.61817	0.684848
3	295	692	745	1.42	10.5	4.608	-2	6	-1.27	3.81	4.01609	0.871548
3	296	692	745	0	10.5333	4.608	-2	6	-1.27	3.81	4.01609	0.871548
3	297	694	744	1.42	10.5667	6.028	0	5	0	3.175	3.175	0.526709
3	298	693	744	0.635	10.6	6.663	-1	5	-0.635	3.175	3.23788	0.485949
3	299	693	743	0.635	10.6333	7.298	-1	4	-0.635	2.54	2.61817	0.358752
3	300	694	743	0.635	10.6667	7.933	-1	3	-0.635	1.905	2.00805	0.253126
3	301	694	743	0	10.7	7.035	-1	3	-0.635	1.905	2.00805	0.285437
3	302	695	744	0.898	10.7333	7.933	0	4	0	2.54	2.54	0.320182
3	303	694	743	0.898	10.7667	8.831	-1	3	-0.635	1.905	2.00805	0.227386
3	304	694	743	0	10.8	8.831	1	0	0.635	0	0.635	0.0719058
3	305	694	743	0	10.8333	6.541	1	0	0.635	0	0.635	0.09708
3	306	694	743	0	10.8667	6.541	1	0	0.635	0	0.635	0.09708
3	307	694	743	0	10.9	6.541	1	0	0.635	0	0.635	0.09708
3	308	694	743	0	10.9333	6.541	1	0	0.635	0	0.635	0.09708
3	309	694	741	1.27	10.9667	7.811	1	-2	0.635	-1.27	1.4199	0.181783
3	310	694	741	0	11	7.811	2	-4	1.27	-2.54	2.83981	0.363565
4	10	282	853	0	1	NA	NA	NA	NA	NA	NA	NA
4	11	285	857	3.175	1.03333	NA	NA	NA	NA	NA	NA	NA
4	12	285	857	0	1.06667	NA	NA	NA	NA	NA	NA	NA
4	13	285	861	2.54	1.1	NA	NA	NA	NA	NA	NA	NA
4	14	285	861	0	1.13333	NA	NA	NA	NA	NA	NA	NA
4	15	285	859	1.27	1.16667	NA	NA	NA	NA	NA	NA	NA
4	16	285	858	0.635	1.2	NA	NA	NA	NA	NA	NA	NA
4	17	285	858	0	1.23333	NA	NA	NA	NA	NA	NA	NA
4	18	285	857	0.635	1.26667	NA	NA	NA	NA	NA	NA	NA
4	19	285	857	0	1.3	NA	NA	NA	NA	NA	NA	NA
4	20	281	858	2.618	1.33333	NA	NA	NA	NA	NA	NA	NA
4	21	281	858	0	1.36667	NA	NA	NA	NA	NA	NA	NA
4	22	284	859	2.008	1.4	NA	NA	NA	NA	NA	NA	NA
4	23	284	859	0	1.43333	NA	NA	NA	NA	NA	NA	NA
4	24	282	857	1.796	1.46667	NA	NA	NA	NA	NA	NA	NA
4	25	284	854	2.29	1.5	16.967	2	1	1.27	0.635	1.4199	0.0836862
4	26	282	851	2.29	1.53333	19.257	-3	-6	-1.905	-3.81	4.25971	0.221203
4	27	282	851	0	1.56667	16.082	-3	-6	-1.905	-3.81	4.25971	0.264874
4	28	282	851	0	1.6	16.082	-3	-10	-1.905	-6.35	6.62959	0.412237
4	29	280	850	1.42	1.63333	14.962	-5	-11	-3.175	-6.985	7.67273	0.512815
4	30	280	850	0	1.66667	14.962	-5	-9	-3.175	-5.715	6.53773	0.436955
4	31	278	850	1.27	1.7	14.962	-7	-8	-4.445	-5.08	6.75014	0.451152
4	32	278	850	0	1.73333	14.327	-7	-8	-4.445	-5.08	6.75014	0.471148
4	33	278	850	0	1.76667	14.327	-7	-7	-4.445	-4.445	6.28618	0.438765
4	34	278	849	0.635	1.8	14.327	-7	-8	-4.445	-5.08	6.75014	0.471148
4	35	278	849	0	1.83333	14.327	-3	-9	-1.905	-5.715	6.02414	0.420475
4	36	278	847	1.27	1.86667	12.979	-3	-11	-1.905	-6.985	7.24011	0.557833
4	37	278	847	0	1.9	12.979	-6	-12	-3.81	-7.62	8.51942	0.6564
4	38	280	851	2.84	1.93333	13.811	-4	-8	-2.54	-5.08	5.67961	0.411238
4	39	281	853	1.42	1.96667	15.231	-1	-4	-0.635	-2.54	2.61817	0.171898
4	40	284	855	2.29	2	15.725	0	1	0	0.635	0.635	0.0403816
4	41	284	855	0	2.03333	13.435	2	4	1.27	2.54	2.83981	0.211374
4	42	285	857	1.42	2.06667	12.565	3	6	1.905	3.81	4.25971	0.339014
4	43	285	857	0	2.1	12.565	3	6	1.905	3.81	4.25971	0.339014
4	44	285	857	0	2.13333	12.565	5	7	3.175	4.445	5.46248	0.434737
4	45	286	855	1.42	2.16667	12.565	6	5	3.81	3.175	4.95951	0.394708
4	46	286	855	0	2.2	12.565	8	5	5.08	3.175	5.99058	0.476767
4	47	286	855	0	2.23333	11.295	8	5	5.08	3.175	5.99058	0.530374
4	48	286	857	1.27	2.26667	12.565	8	7	5.08	4.445	6.75014	0.537218
4	49	286	857	0	2.3	12.565	8	8	5.08	5.08	7.1842	0.571763
4	50	286	857	0	2.33333	11.93	8	8	5.08	5.08	7.1842	0.602197
4	51	286	857	0	2.36667	11.93	8	10	5.08	6.35	8.13197	0.68164
4	52	286	858	0.635	2.4	11.295	8	11	5.08	6.985	8.63693	0.764669
4	53	286	858	0	2.43333	11.295	6	7	3.81	4.445	5.85441	0.518319
4	54	289	859	2.008	2.46667	10.463	8	6	5.08	3.81	6.35	0.606901
4	55	289	859	0	2.5	9.043	5	4	3.175	2.54	4.06598	0.449628
4	56	289	859	0	2.53333	6.753	5	4	3.175	2.54	4.06598	0.6021
4	57	289	859	0	2.56667	6.753	4	2	2.54	1.27	2.83981	0.420525
4	58	289	859	0	2.6	5.333	4	2	2.54	1.27	2.83981	0.532497
4	59	289	859	0	2.63333	5.333	4	2	2.54	1.27	2.83981	0.532497
4	60	289	859	0	2.66667	5.333	3	4	1.905	2.54	3.175	0.59535
4	61	289	859	0	2.7	3.913	3	4	1.905	2.54	3.175	0.811398
4	62	289	859	0	2.73333	3.913	3	4	1.905	2.54	3.175	0.811398
4	63	289	859	0	2.76667	3.913	3	2	1.905	1.27	2.28953	0.585107
4	64	289	859	0	2.8	2.643	3	2	1.905	1.27	2.28953	0.86626
4	65	289	859	0	2.83333	2.643	3	2	1.905	1.27	2.28953	0.86626
4	66	292	859	1.905	2.86667	4.548	6	2	3.81	1.27	4.01609	0.883046
4	67	292	859	0	2.9	4.548	6	1	3.81	0.635	3.86255	0.849286
4	68	292	859	0	2.93333	3.913	6	1	3.81	0.635	3.86255	0.987108
4	69	292	858	0.635	2.96667	4.548	3	-1	1.905	-0.635	2.00805	0.441523
4	70	292	858	0	3	2.54	3	-1	1.905	-0.635	2.00805	0.790569
4	71	293	858	0.635	3.03333	3.175	4	-1	2.54	-0.635	2.61817	0.824621
4	72	293	858	0	3.06667	3.175	4	-1	2.54	-0.635	2.61817	0.824621
4	73	293	858	0	3.1	3.175	4	-1	2.54	-0.635	2.61817	0.824621
4	74	293	858	0	3.13333	3.175	4	-1	2.54	-0.635	2.61817	0.824621
4	75	293	858	0	3.16667	3.175	4	-1	2.54	-0.635	2.61817	0.824621
4	76	293	858	0	3.2	3.175	4	-1	2.54	-0.635	2.61817	0.824621
4	77	292	858	0.635	3.23333	3.81	3	-1	1.905	-0.635	2.00805	0.527046
4	78	292	858	0	3.26667	3.81	3	-1	1.905	-0.635	2.00805	0.527046
4	79	292	857	0.635	3.3	4.445	3	-2	1.905	-1.27	2.28953	0.515079
4	80	292	857	0	3.33333	4.445	3	-2	1.905	-1.27	2.28953	0.515079
4	81	292	857	0	3.36667	4.445	0	-2	0	-1.27	1.27	0.285714
4	82	290	857	1.27	3.4	3.81	-2	-2	-1.27	-1.27	1.79605	0.471405
4	83	290	857	0	3.43333	3.81	-2	-2	-1.27	-1.27	1.79605	0.471405
4	84	290	857	0	3.46667	3.81	-2	-1	-1.27	-0.635	1.4199	0.372678
4	85	290	857	0	3.5	3.175	-2	-1	-1.27	-0.635	1.4199	0.447214
4	86	286	863	4.579	3.53333	7.754	-7	5	-4.445	3.175	5.46248	0.704472
4	87	286	865	1.27	3.56667	8.389	-7	7	-4.445	4.445	6.28618	0.749336
4	88	286	867	1.27	3.6	9.659	-7	9	-4.445	5.715	7.24011	0.749572
4	89	286	869	1.27	3.63333	10.929	-7	11	-4.445	6.985	8.27939	0.757561
4	90	286	871	1.27	3.66667	12.199	-7	13	-4.445	8.255	9.37566	0.76856
4	91	286	874	1.905	3.7	14.104	-7	16	-4.445	10.16	11.0898	0.786287
4	92	288	877	2.29	3.73333	16.394	-4	19	-2.54	12.065	12.3295	0.752072
4	93	288	877	0	3.76667	15.759	-4	19	-2.54	12.065	12.3295	0.782376
4	94	312	871	15.709	3.8	31.468	20	14	12.7	8.89	15.5023	0.492638
4	95	326	869	8.98	3.83333	39.813	34	12	21.59	7.62	22.8953	0.57507
4	96	317	870	5.75	3.86667	45.563	25	13	15.875	8.255	17.893	0.39271
4	97	324	875	5.462	3.9	51.025	34	18	21.59	11.43	24.4289	0.478764
4	98	326	894	12.132	3.93333	61.887	36	37	22.86	23.495	32.781	0.529691
4	99	330	894	2.54	3.96667	64.427	40	37	25.4	23.495	34.6002	0.537045
4	100	333	895	2.008	4	66.435	43	38	27.305	24.13	36.4393	0.548495
4	101	338	895	3.175	4.03333	69.61	52	32	33.02	20.32	38.7714	0.556981
4	102	338	898	1.905	4.06667	66.936	52	33	33.02	20.955	39.108	0.584259
4	103	340	898	1.27	4.1	66.936	54	31	34.29	19.685	39.5386	0.590693
4	104	345	894	4.066	4.13333	69.732	59	25	37.465	15.875	40.6896	0.583514
4	105	350	890	4.066	4.16667	72.528	64	19	40.64	12.065	42.3931	0.584506
4	106	353	889	2.008	4.2	73.266	67	15	42.545	9.525	43.5982	0.595067
4	107	354	887	1.42	4.23333	72.781	66	10	41.91	6.35	42.3883	0.582409
4	108	357	891	3.175	4.26667	73.666	69	14	43.815	8.89	44.7078	0.606899
4	109	357	893	1.27	4.3	74.936	45	22	28.575	13.97	31.8071	0.424457
4	110	358	893	0.635	4.33333	59.862	32	24	20.32	15.24	25.4	0.424309
4	111	361	895	2.29	4.36667	53.172	44	25	27.94	15.875	32.135	0.60436
4	112	378	901	11.448	4.4	58.87	54	26	34.29	16.51	38.0576	0.646469
4	113	382	905	3.592	4.43333	57	56	11	35.56	6.985	36.2395	0.635781
4	114	380	905	1.27	4.46667	46.138	50	11	31.75	6.985	32.5093	0.704609
4	115	380	905	0	4.5	43.598	47	10	29.845	6.35	30.5131	0.699873
4	116	382	906	1.42	4.53333	43.01	44	11	27.94	6.985	28.7999	0.669609
4	117	382	909	1.905	4.56667	41.74	44	11	27.94	6.985	28.7999	0.689983
4	118	384	910	1.42	4.6	41.255	44	12	27.94	7.62	28.9605	0.701987
4	119	385	913	2.008	4.63333	41.993	40	19	25.4	12.065	28.1198	0.669631
4	120	392	911	4.623	4.66667	42.55	42	21	26.67	13.335	29.818	0.700775
4	121	400	906	5.991	4.7	44.475	47	17	29.845	10.795	31.7373	0.713599
4	122	400	906	0	4.73333	42.467	46	19	29.21	12.065	31.6036	0.744192
4	123	404	907	2.618	4.76667	43.665	47	16	29.845	10.16	31.527	0.722019
4	124	409	910	3.703	4.8	44.193	52	17	33.02	10.795	34.7398	0.786092
4	125	409	913	1.905	4.83333	44.828	51	20	32.385	12.7	34.7862	0.775992
4	126	410	914	0.898	4.86667	45.091	49	19	31.115	12.065	33.3723	0.740109
4	127	412	915	1.42	4.9	44.221	34	14	21.59	8.89	23.3487	0.528
4	128	412	915	0	4.93333	32.773	30	10	19.05	6.35	20.0805	0.612714
4	129	412	915	0	4.96667	29.181	32	10	20.32	6.35	21.2891	0.729553
4	130	413	914	0.898	5	28.809	33	9	20.955	5.715	21.7203	0.753943
4	131	414	913	0.898	5.03333	29.707	32	7	20.32	4.445	20.8005	0.700188
4	132	414	909	2.54	5.06667	30.827	32	0	20.32	0	20.32	0.659162
4	133	414	907	1.27	5.1	30.192	30	-3	19.05	-1.905	19.145	0.634109
4	134	414	910	1.905	5.13333	30.677	29	-3	18.415	-1.905	18.5133	0.60349
4	135	416	910	1.27	5.16667	29.939	24	-1	15.24	-0.635	15.2532	0.509477
4	136	417	914	2.618	5.2	27.934	17	8	10.795	5.08	11.9306	0.427098
4	137	418	915	0.898	5.23333	22.841	18	9	11.43	5.715	12.7791	0.559482
4	138	420	918	2.29	5.26667	25.131	16	11	10.16	6.985	12.3295	0.490608
4	139	420	918	0	5.3	22.513	11	8	6.985	5.08	8.63693	0.383642
4	140	421	921	2.008	5.33333	20.818	12	8	7.62	5.08	9.1581	0.439913
4	141	425	926	4.066	5.36667	22.979	15	12	9.525	7.62	12.198	0.53083
4	142	430	930	4.066	5.4	26.147	18	15	11.43	9.525	14.8785	0.569034
4	143	434	931	2.618	5.43333	27.345	22	16	13.97	10.16	17.2739	0.631701
4	144	440	931	3.81	5.46667	31.155	28	16	17.78	10.16	20.4781	0.657298
4	145	438	930	1.42	5.5	32.575	25	16	15.875	10.16	18.8478	0.578598
4	146	440	929	1.42	5.53333	33.097	26	16	16.51	10.16	19.3857	0.585724
4	147	441	925	2.618	5.56667	34.817	27	16	17.145	10.16	19.9293	0.572401
4	148	445	921	3.592	5.6	35.869	31	14	19.685	8.89	21.5993	0.602173
4	149	446	919	1.42	5.63333	36.019	32	9	20.32	5.715	21.1084	0.586035
4	150	449	915	3.175	5.66667	37.289	33	5	20.955	3.175	21.1942	0.568376
4	151	452	921	4.26	5.7	40.279	35	7	22.225	4.445	22.6651	0.562704
4	152	454	921	1.27	5.73333	38.931	36	6	22.86	3.81	23.1753	0.595292
4	153	456	921	1.27	5.76667	39.303	36	3	22.86	1.905	22.9392	0.583651
4	154	456	919	1.27	5.8	38.283	36	1	22.86	0.635	22.8688	0.597362
4	155	457	917	1.42	5.83333	39.703	36	-4	22.86	-2.54	23.0007	0.579318
4	156	461	910	5.12	5.86667	42.815	36	-16	22.86	-10.16	25.0161	0.584284
4	157	465	906	3.592	5.9	42.341	35	-24	22.225	-15.24	26.9483	0.636458
4	158	478	901	8.845	5.93333	47.12	44	-30	27.94	-19.05	33.8164	0.717665
4	159	481	899	2.29	5.96667	46.792	41	-32	26.035	-20.32	33.0261	0.705807
4	160	484	899	1.905	6	44.887	46	-31	29.21	-19.685	35.2239	0.784724
4	161	494	898	6.382	6.03333	49.849	54	-31	34.29	-19.685	39.5386	0.793168
4	162	501	895	4.836	6.06667	53.265	60	-30	38.1	-19.05	42.5971	0.79972
4	163	509	890	5.991	6.1	56.638	64	-31	40.64	-19.685	45.1565	0.797283
4	164	509	890	0	6.13333	53.046	63	-29	40.005	-18.415	44.0399	0.830221
4	165	509	890	0	6.16667	51.626	60	-25	38.1	-15.875	41.275	0.7995
4	166	509	890	0	6.2	48.451	57	-31	36.195	-19.685	41.2017	0.850378
4	167	510	889	0.898	6.23333	45.089	56	-32	35.56	-20.32	40.9563	0.908343
4	168	512	889	1.27	6.26667	45.089	56	-32	35.56	-20.32	40.9563	0.908343
4	169	512	887	1.27	6.3	45.089	56	-32	35.56	-20.32	40.9563	0.908343
4	170	513	887	0.635	6.33333	44.454	56	-30	35.56	-19.05	40.3412	0.907483
4	171	508	891	4.066	6.36667	47.1	47	-19	29.845	-12.065	32.1914	0.68347
4	172	508	890	0.635	6.4	42.615	43	-16	27.305	-10.16	29.134	0.683655
4	173	510	889	1.42	6.43333	40.443	32	-12	20.32	-7.62	21.7018	0.536601
4	174	512	889	1.27	6.46667	32.868	31	-10	19.685	-6.35	20.6839	0.629301
4	175	513	887	1.42	6.5	31.998	29	-12	18.415	-7.62	19.9293	0.622829
4	176	513	886	0.635	6.53333	30.728	19	-12	12.065	-7.62	14.2699	0.464392
4	177	518	889	3.703	6.56667	28.049	17	-6	10.795	-3.81	11.4476	0.40813
4	178	525	883	5.854	6.6	29.067	16	-7	10.16	-4.445	11.0898	0.381525
4	179	526	882	0.898	6.63333	23.974	17	-8	10.795	-5.08	11.9306	0.497646
4	180	514	895	11.234	6.66667	35.208	5	5	3.175	3.175	4.49013	0.127531
4	181	514	895	0	6.7	35.208	5	5	3.175	3.175	4.49013	0.127531
4	182	514	897	1.27	6.73333	36.478	4	8	2.54	5.08	5.67961	0.1557
4	183	514	897	0	6.76667	35.58	2	8	1.27	5.08	5.23634	0.147171
4	184	514	897	0	6.8	34.31	2	10	1.27	6.35	6.47575	0.188742
4	185	514	897	0	6.83333	33.04	1	10	0.635	6.35	6.38167	0.19315
4	186	513	902	3.238	6.86667	35.643	5	11	3.175	6.985	7.67273	0.215266
4	187	510	905	2.694	6.9	34.271	2	15	1.27	9.525	9.60929	0.280391
4	188	509	905	0.635	6.93333	34.271	-1	16	-0.635	10.16	10.1798	0.297039
4	189	508	909	2.618	6.96667	35.469	-4	20	-2.54	12.7	12.9515	0.36515
4	190	508	909	0	7	34.199	-5	22	-3.175	13.97	14.3263	0.418909
4	191	506	914	3.42	7.03333	36.199	-7	28	-4.445	17.78	18.3272	0.50629
4	192	506	914	0	7.06667	35.564	-12	25	-7.62	15.875	17.6091	0.495138
4	193	502	921	5.12	7.1	36.981	-23	38	-14.605	24.13	28.2057	0.762709
4	194	502	922	0.635	7.13333	31.762	-24	40	-15.24	25.4	29.6212	0.9326
4	195	500	923	1.42	7.16667	32.284	-14	28	-8.89	17.78	19.8786	0.615743
4	196	497	923	1.905	7.2	22.955	-17	28	-10.795	17.78	20.8005	0.906142
4	197	494	923	1.905	7.23333	24.86	-20	26	-12.7	16.51	20.8295	0.837874
4	198	494	922	0.635	7.26667	24.225	-20	25	-12.7	15.875	20.3299	0.839212
4	199	493	919	2.008	7.3	26.233	-21	22	-13.335	13.97	19.3128	0.736201
4	200	493	918	0.635	7.33333	26.868	-21	21	-13.335	13.335	18.8585	0.701896
4	201	492	918	0.635	7.36667	27.503	-21	16	-13.335	10.16	16.7645	0.609551
4	202	492	915	1.905	7.4	26.17	-18	10	-11.43	6.35	13.0755	0.499635
4	203	492	914	0.635	7.43333	24.111	-17	9	-10.795	5.715	12.2145	0.506593
4	204	494	910	2.84	7.46667	26.316	-14	1	-8.89	0.635	8.91265	0.338678
4	205	494	906	2.54	7.5	26.238	-14	-3	-8.89	-1.905	9.09182	0.346513
4	206	493	905	0.898	7.53333	27.136	-13	-9	-8.255	-5.715	10.0402	0.369997
4	207	494	899	3.863	7.56667	27.579	-12	-15	-7.62	-9.525	12.198	0.442291
4	208	493	898	0.898	7.6	28.477	-9	-23	-5.715	-14.605	15.6833	0.550737
4	209	493	894	2.54	7.63333	25.897	-9	-28	-5.715	-17.78	18.6759	0.721161
4	210	493	894	0	7.66667	25.262	-7	-29	-4.445	-18.415	18.9439	0.749896
4	211	494	893	0.898	7.7	24.74	-3	-30	-1.905	-19.05	19.145	0.773849
4	212	494	893	0	7.73333	22.835	0	-30	0	-19.05	19.05	0.834246
4	213	497	894	2.008	7.76667	22.938	3	-28	1.905	-17.78	17.8818	0.779569
4	214	497	893	0.635	7.8	22.938	4	-26	2.54	-16.51	16.7042	0.728234
4	215	497	893	0	7.83333	20.93	4	-25	2.54	-15.875	16.0769	0.768128
4	216	497	891	1.27	7.86667	21.565	5	-27	3.175	-17.145	17.4365	0.808556
4	217	497	891	0	7.9	20.93	5	-24	3.175	-15.24	15.5672	0.743775
4	218	497	891	0	7.93333	19.025	5	-23	3.175	-14.605	14.9461	0.785604
4	219	497	897	3.81	7.96667	22.2	3	-13	1.905	-8.255	8.47196	0.38162
4	220	497	897	0	8	19.36	3	-9	1.905	-5.715	6.02414	0.311164
4	221	501	898	2.618	8.03333	19.438	8	-7	5.08	-4.445	6.75014	0.347265
4	222	501	898	0	8.06667	18.54	7	-1	4.445	-0.635	4.49013	0.242186
4	223	501	897	0.635	8.1	15.312	8	-1	5.08	-0.635	5.11953	0.334348
4	224	497	897	2.54	8.13333	16.954	4	3	2.54	1.905	3.175	0.187271
4	225	497	897	0	8.16667	14.414	4	3	2.54	1.905	3.175	0.220272
4	226	485	883	11.709	8.2	26.123	-9	-10	-5.715	-6.35	8.54305	0.327032
4	227	485	883	0	8.23333	25.225	-9	-10	-5.715	-6.35	8.54305	0.338674
4	228	484	882	0.898	8.26667	26.123	-13	-12	-8.255	-7.62	11.2343	0.430054
4	229	484	881	0.635	8.3	24.75	-13	-12	-8.255	-7.62	11.2343	0.453911
4	230	482	879	1.796	8.33333	25.911	-15	-14	-9.525	-8.89	13.0291	0.502841
4	231	482	878	0.635	8.36667	26.546	-15	-13	-9.525	-8.255	12.6044	0.474813
4	232	481	877	0.898	8.4	26.174	-16	-14	-10.16	-8.89	13.5003	0.51579
4	233	482	877	0.635	8.43333	26.809	-15	-14	-9.525	-8.89	13.0291	0.485998
4	234	484	881	2.84	8.46667	29.649	-13	-16	-8.255	-10.16	13.0909	0.441528
4	235	484	891	6.35	8.5	32.189	-13	-6	-8.255	-3.81	9.09182	0.282451
4	236	484	893	1.27	8.53333	33.459	-17	-5	-10.795	-3.175	11.2522	0.336299
4	237	484	895	1.27	8.56667	32.111	-17	-3	-10.795	-1.905	10.9618	0.341372
4	238	484	895	0	8.6	32.111	-17	-2	-10.795	-1.27	10.8694	0.338496
4	239	484	897	1.27	8.63333	32.746	-13	0	-8.255	0	8.255	0.252092
4	240	484	899	1.27	8.66667	31.476	-13	2	-8.255	1.27	8.35212	0.265349
4	241	484	902	1.905	8.7	33.381	-1	19	-0.635	12.065	12.0817	0.361933
4	242	484	902	0	8.73333	21.672	-1	19	-0.635	12.065	12.0817	0.55748
4	243	480	889	8.637	8.76667	30.309	-4	7	-2.54	4.445	5.11953	0.168911
4	244	480	889	0	8.8	29.411	-4	8	-2.54	5.08	5.67961	0.193112
4	245	480	889	0	8.83333	28.776	-2	10	-1.27	6.35	6.47575	0.22504
4	246	480	889	0	8.86667	26.98	-2	11	-1.27	6.985	7.09952	0.26314
4	247	480	889	0	8.9	26.345	-1	12	-0.635	7.62	7.64641	0.290242
4	248	481	891	1.42	8.93333	26.867	-1	14	-0.635	8.89	8.91265	0.331732
4	249	481	891	0	8.96667	26.232	-3	10	-1.905	6.35	6.62959	0.252729
4	250	481	895	2.54	9	25.932	-3	4	-1.905	2.54	3.175	0.122436
4	251	481	895	0	9.03333	19.582	-3	2	-1.905	1.27	2.28953	0.11692
4	252	481	895	0	9.06667	18.312	-3	0	-1.905	0	1.905	0.10403
4	253	485	897	2.84	9.1	19.882	1	2	0.635	1.27	1.4199	0.0714165
4	254	485	897	0	9.13333	19.882	1	0	0.635	0	0.635	0.0319384
4	255	485	897	0	9.16667	18.612	1	-2	0.635	-1.27	1.4199	0.0762897
4	256	474	881	12.329	9.2	29.671	-10	-21	-6.35	-13.335	14.7697	0.497783
4	257	474	881	0	9.23333	27.766	-10	-21	-6.35	-13.335	14.7697	0.531936
4	258	470	882	2.618	9.26667	30.384	-10	-7	-6.35	-4.445	7.75116	0.255107
4	259	470	882	0	9.3	21.747	-10	-7	-6.35	-4.445	7.75116	0.356424
4	260	470	882	0	9.33333	21.747	-10	-7	-6.35	-4.445	7.75116	0.356424
4	261	470	882	0	9.36667	21.747	-10	-7	-6.35	-4.445	7.75116	0.356424
4	262	469	885	2.008	9.4	23.755	-11	-4	-6.985	-2.54	7.43248	0.312881
4	263	469	885	0	9.43333	23.755	-12	-6	-7.62	-3.81	8.51942	0.358637
4	264	469	885	0	9.46667	22.335	-12	-6	-7.62	-3.81	8.51942	0.381438
4	265	470	889	2.618	9.5	24.953	-11	-6	-6.985	-3.81	7.95653	0.318861
4	266	470	889	0	9.53333	22.413	-11	-6	-6.985	-3.81	7.95653	0.354996
4	267	473	894	3.703	9.56667	26.116	-8	-1	-5.08	-0.635	5.11953	0.196031
4	268	473	894	0	9.6	26.116	-12	-3	-7.62	-1.905	7.85452	0.300755
4	269	473	895	0.635	9.63333	23.911	-12	-2	-7.62	-1.27	7.72511	0.323078
4	270	473	897	1.27	9.66667	25.181	-12	0	-7.62	0	7.62	0.302609
4	271	473	897	0	9.7	25.181	-1	16	-0.635	10.16	10.1798	0.404266
4	272	473	897	0	9.73333	12.852	-1	16	-0.635	10.16	10.1798	0.792081
4	273	473	897	0	9.76667	12.852	3	15	1.905	9.525	9.71363	0.755807
4	274	473	897	0	9.8	10.234	3	15	1.905	9.525	9.71363	0.949153
4	275	473	899	1.27	9.83333	11.504	3	17	1.905	10.795	10.9618	0.952869
4	276	473	899	0	9.86667	11.504	3	17	1.905	10.795	10.9618	0.952869
4	277	473	899	0	9.9	11.504	4	14	2.54	8.89	9.24574	0.803698
4	278	473	899	0	9.93333	9.496	4	14	2.54	8.89	9.24574	0.973646
4	279	473	899	0	9.96667	9.496	4	14	2.54	8.89	9.24574	0.973646
4	280	473	899	0	10	9.496	3	10	1.905	6.35	6.62959	0.698146
4	281	472	899	0.635	10.0333	7.513	2	10	1.27	6.35	6.47575	0.86194
4	282	484	899	7.62	10.0667	15.133	11	5	6.985	3.175	7.67273	0.50702
4	283	484	899	0	10.1	11.43	11	5	6.985	3.175	7.67273	0.67128
4	284	484	899	0	10.1333	11.43	11	4	6.985	2.54	7.43248	0.650261
4	285	484	899	0	10.1667	10.795	11	2	6.985	1.27	7.09952	0.657667
4	286	482	899	1.27	10.2	10.795	9	2	5.715	1.27	5.85441	0.542326
4	287	482	899	0	10.2333	10.795	9	2	5.715	1.27	5.85441	0.542326
4	288	482	899	0	10.2667	10.795	9	2	5.715	1.27	5.85441	0.542326
4	289	482	899	0	10.3	10.795	9	2	5.715	1.27	5.85441	0.542326
4	290	482	899	0	10.3333	10.795	9	0	5.715	0	5.715	0.529412
4	291	480	899	1.27	10.3667	10.795	7	0	4.445	0	4.445	0.411765
4	292	480	899	0	10.4	10.795	7	0	4.445	0	4.445	0.411765
4	293	481	903	2.618	10.4333	13.413	8	4	5.08	2.54	5.67961	0.423441
4	294	481	903	0	10.4667	13.413	8	4	5.08	2.54	5.67961	0.423441
4	295	481	903	0	10.5	13.413	8	4	5.08	2.54	5.67961	0.423441
4	296	481	903	0	10.5333	13.413	9	4	5.715	2.54	6.25402	0.466266
4	297	481	902	0.635	10.5667	13.413	-3	3	-1.905	1.905	2.69408	0.200856
4	298	481	901	0.635	10.6	6.428	-3	2	-1.905	1.27	2.28953	0.35618
4	299	481	901	0	10.6333	6.428	-3	2	-1.905	1.27	2.28953	0.35618
4	300	484	901	1.905	10.6667	8.333	0	2	0	1.27	1.27	0.152406
4	301	484	901	0	10.7	8.333	2	2	1.27	1.27	1.79605	0.215535
4	302	484	901	0	10.7333	7.063	2	2	1.27	1.27	1.79605	0.25429
4	303	484	901	0	10.7667	7.063	2	2	1.27	1.27	1.79605	0.25429
4	304	484	901	0	10.8	7.063	2	2	1.27	1.27	1.79605	0.25429
4	305	484	901	0	10.8333	7.063	2	2	1.27	1.27	1.79605	0.25429
4	306	484	901	0	10.8667	7.063	4	2	2.54	1.27	2.83981	0.402068
4	307	484	901	0	10.9	5.793	4	2	2.54	1.27	2.83981	0.490213
4	308	484	901	0	10.9333	5.793	3	-2	1.905	-1.27	2.28953	0.395223
4	309	482	897	2.84	10.9667	6.015	1	-6	0.635	-3.81	3.86255	0.642154
4	310	482	897	0	11	6.015	1	-6	0.635	-3.81	3.86255	0.642154
5	10	266	827	0	1	NA	NA	NA	NA	NA	NA	NA
5	11	265	827	0.635	1.03333	NA	NA	NA	NA	NA	NA	NA
5	12	268	827	1.905	1.06667	NA	NA	NA	NA	NA	NA	NA
5	13	266	826	1.42	1.1	NA	NA	NA	NA	NA	NA	NA
5	14	266	826	0	1.13333	NA	NA	NA	NA	NA	NA	NA
5	15	266	826	0	1.16667	NA	NA	NA	NA	NA	NA	NA
5	16	266	826	0	1.2	NA	NA	NA	NA	NA	NA	NA
5	17	272	825	3.863	1.23333	NA	NA	NA	NA	NA	NA	NA
5	18	274	822	2.29	1.26667	NA	NA	NA	NA	NA	NA	NA
5	19	277	818	3.175	1.3	NA	NA	NA	NA	NA	NA	NA
5	20	280	815	2.694	1.33333	NA	NA	NA	NA	NA	NA	NA
5	21	277	823	5.425	1.36667	NA	NA	NA	NA	NA	NA	NA
5	22	280	833	6.63	1.4	NA	NA	NA	NA	NA	NA	NA
5	23	288	826	6.75	1.43333	NA	NA	NA	NA	NA	NA	NA
5	24	292	825	2.618	1.46667	NA	NA	NA	NA	NA	NA	NA
5	25	292	823	1.27	1.5	38.675	26	-4	16.51	-2.54	16.7042	0.431913
5	26	293	821	1.42	1.53333	40.095	28	-6	17.78	-3.81	18.1836	0.453514
5	27	300	818	4.836	1.56667	44.296	32	-9	20.32	-5.715	21.1084	0.47653
5	28	300	818	0	1.6	42.391	34	-8	21.59	-5.08	22.1796	0.523215
5	29	300	818	0	1.63333	40.971	34	-8	21.59	-5.08	22.1796	0.541349
5	30	300	814	2.54	1.66667	43.511	34	-12	21.59	-7.62	22.8953	0.526195
5	31	300	814	0	1.7	43.511	34	-12	21.59	-7.62	22.8953	0.526195
5	32	300	822	5.08	1.73333	48.591	28	-3	17.78	-1.905	17.8818	0.368006
5	33	304	819	3.175	1.76667	47.903	30	-3	19.05	-1.905	19.145	0.399662
5	34	305	819	0.635	1.8	46.248	28	1	17.78	0.635	17.7913	0.384694
5	35	309	818	2.618	1.83333	45.691	29	3	18.415	1.905	18.5133	0.405184
5	36	312	817	2.008	1.86667	45.005	35	-6	22.225	-3.81	22.5492	0.501038
5	37	313	815	1.42	1.9	41	33	-18	20.955	-11.43	23.8696	0.582185
5	38	312	813	1.42	1.93333	35.79	24	-13	15.24	-8.255	17.3321	0.484273
5	39	308	805	5.68	1.96667	34.72	16	-20	10.16	-12.7	16.2639	0.468431
5	40	308	802	1.905	2	34.007	16	-21	10.16	-13.335	16.7645	0.492971
5	41	304	802	2.54	2.03333	35.277	11	-19	6.985	-12.065	13.9411	0.39519
5	42	304	802	0	2.06667	33.857	4	-16	2.54	-10.16	10.4727	0.309321
5	43	301	802	1.905	2.1	30.926	1	-16	0.635	-10.16	10.1798	0.329167
5	44	300	802	0.635	2.13333	31.561	0	-16	0	-10.16	10.16	0.321916
5	45	297	802	1.905	2.16667	33.466	-3	-12	-1.905	-7.62	7.85452	0.234701
5	46	297	802	0	2.2	30.926	-3	-12	-1.905	-7.62	7.85452	0.253978
5	47	292	806	4.066	2.23333	34.992	-8	-16	-5.08	-10.16	11.3592	0.324623
5	48	292	806	0	2.26667	29.912	-12	-13	-7.62	-8.255	11.2343	0.375578
5	49	292	806	0	2.3	26.737	-13	-13	-8.255	-8.255	11.6743	0.436636
5	50	292	806	0	2.33333	26.102	-17	-12	-10.795	-7.62	13.2135	0.506225
5	51	292	807	0.635	2.36667	24.119	-20	-10	-12.7	-6.35	14.199	0.588707
5	52	292	807	0	2.4	22.111	-21	-8	-13.335	-5.08	14.2699	0.645373
5	53	292	807	0	2.43333	20.691	-20	-6	-12.7	-3.81	13.2592	0.640819
5	54	288	810	3.175	2.46667	22.446	-20	5	-12.7	3.175	13.0909	0.583216
5	55	288	809	0.635	2.5	17.401	-20	7	-12.7	4.445	13.4554	0.773255
5	56	288	809	0	2.53333	15.496	-16	7	-10.16	4.445	11.0898	0.715656
5	57	289	809	0.635	2.56667	13.591	-15	7	-9.525	4.445	10.5111	0.773388
5	58	293	809	2.54	2.6	16.131	-8	7	-5.08	4.445	6.75014	0.418458
5	59	293	809	0	2.63333	14.226	-7	7	-4.445	4.445	6.28618	0.44188
5	60	293	807	1.27	2.66667	14.861	-4	5	-2.54	3.175	4.06598	0.273601
5	61	293	806	0.635	2.7	13.591	-4	4	-2.54	2.54	3.5921	0.2643
5	62	294	806	0.635	2.73333	14.226	2	0	1.27	0	1.27	0.0892732
5	63	294	806	0	2.76667	10.16	2	0	1.27	0	1.27	0.125
5	64	294	806	0	2.8	10.16	2	0	1.27	0	1.27	0.125
5	65	294	806	0	2.83333	10.16	2	0	1.27	0	1.27	0.125
5	66	292	807	1.42	2.86667	11.58	0	0	0	0	0	0
5	67	292	807	0	2.9	10.945	0	0	0	0	0	0
5	68	292	807	0	2.93333	10.945	0	0	0	0	0	0
5	69	292	807	0	2.96667	10.945	4	-3	2.54	-1.905	3.175	0.290087
5	70	290	810	2.29	3	10.06	2	1	1.27	0.635	1.4199	0.141143
5	71	289	809	0.898	3.03333	10.323	1	0	0.635	0	0.635	0.0615131
5	72	289	809	0	3.06667	10.323	0	0	0	0	0	0
5	73	289	807	1.27	3.1	10.958	-4	-2	-2.54	-1.27	2.83981	0.259154
5	74	292	806	2.008	3.13333	10.426	-1	-3	-0.635	-1.905	2.00805	0.1926
5	75	292	806	0	3.16667	10.426	-1	-1	-0.635	-0.635	0.898026	0.0861333
5	76	292	811	3.175	3.2	12.331	-1	5	-0.635	3.175	3.23788	0.26258
5	77	292	811	0	3.23333	11.696	-2	5	-1.27	3.175	3.41958	0.292372
5	78	289	813	2.29	3.26667	13.351	-5	7	-3.175	4.445	5.46248	0.409144
5	79	288	813	0.635	3.3	13.986	-6	7	-3.81	4.445	5.85441	0.418591
5	80	286	811	1.796	3.33333	15.782	-8	5	-5.08	3.175	5.99058	0.379583
5	81	282	809	2.84	3.36667	18.622	-10	2	-6.35	1.27	6.47575	0.347748
5	82	280	807	1.796	3.4	18.998	-12	0	-7.62	0	7.62	0.401095
5	83	277	806	2.008	3.43333	21.006	-15	-1	-9.525	-0.635	9.54614	0.454448
5	84	265	807	7.646	3.46667	28.652	-27	0	-17.145	0	17.145	0.598388
5	85	261	810	3.175	3.5	31.827	-29	0	-18.415	0	18.415	0.578597
5	86	257	811	2.618	3.53333	32.155	-32	2	-20.32	1.27	20.3596	0.633172
5	87	249	815	5.68	3.56667	36.937	-40	6	-25.4	3.81	25.6842	0.69535
5	88	245	818	3.175	3.6	40.112	-44	11	-27.94	6.985	28.7999	0.717987
5	89	240	818	3.175	3.63333	42.017	-52	12	-33.02	7.62	33.8878	0.806527
5	90	220	821	12.842	3.66667	52.851	-72	15	-45.72	9.525	46.7016	0.883647
5	91	209	819	7.1	3.7	59.951	-83	8	-52.705	5.08	52.9493	0.883209
5	92	208	818	0.898	3.73333	57.674	-84	7	-53.34	4.445	53.5249	0.928059
5	93	206	817	1.42	3.76667	59.094	-83	4	-52.705	2.54	52.7662	0.892919
5	94	201	815	3.42	3.8	60.224	-87	2	-55.245	1.27	55.2596	0.917568
5	95	192	814	5.75	3.83333	65.339	-94	3	-59.69	1.905	59.7204	0.914008
5	96	184	814	5.08	3.86667	68.623	-98	5	-62.23	3.175	62.3109	0.908018
5	97	184	813	0.635	3.9	66.418	-96	6	-60.96	3.81	61.0789	0.919614
5	98	180	810	3.175	3.93333	67.797	-97	4	-61.595	2.54	61.6473	0.909293
5	99	176	805	4.066	3.96667	69.855	-89	-2	-56.515	-1.27	56.5293	0.809237
5	100	173	803	2.29	4	64.499	-88	-7	-55.88	-4.445	56.0565	0.869107
5	101	166	798	5.462	4.03333	66.786	-91	-13	-57.785	-8.255	58.3717	0.87401
5	102	156	793	7.1	4.06667	71.268	-93	-22	-59.055	-13.97	60.6849	0.851502
5	103	152	793	2.54	4.1	68.128	-93	-25	-59.055	-15.875	61.1515	0.897597
5	104	149	794	2.008	4.13333	66.961	-91	-24	-57.785	-15.24	59.7609	0.892473
5	105	149	794	0	4.16667	63.786	-71	-27	-45.085	-17.145	48.2349	0.756199
5	106	152	786	5.425	4.2	56.369	-57	-33	-36.195	-20.955	41.8233	0.741956
5	107	152	777	5.715	4.23333	54.984	-56	-41	-35.56	-26.035	44.0719	0.801541
5	108	150	771	4.016	4.26667	58.102	-56	-46	-35.56	-29.21	46.0189	0.792036
5	109	148	771	1.27	4.3	57.952	-53	-44	-33.655	-27.94	43.7413	0.754785
5	110	148	767	2.54	4.33333	57.072	-44	-47	-27.94	-29.845	40.8824	0.71633
5	111	148	762	3.175	4.36667	54.497	-36	-52	-22.86	-33.02	40.1609	0.736938
5	112	140	750	9.158	4.4	58.575	-44	-63	-27.94	-40.005	48.7959	0.833051
5	113	140	750	0	4.43333	57.94	-40	-60	-25.4	-38.1	45.7905	0.790309
5	114	136	747	3.175	4.46667	57.94	-40	-58	-25.4	-36.83	44.7393	0.772167
5	115	132	745	2.84	4.5	56.714	-41	-58	-26.035	-36.83	45.1029	0.795269
5	116	129	745	1.905	4.53333	56.329	-37	-53	-23.495	-33.655	41.0448	0.728662
5	117	112	743	10.869	4.56667	61.736	-44	-50	-27.94	-31.75	42.2931	0.685064
5	118	94	747	11.709	4.6	66.345	-58	-46	-36.83	-29.21	47.0072	0.708526
5	119	88	749	4.016	4.63333	67.821	-61	-45	-38.735	-28.575	48.1345	0.709729
5	120	86	751	1.796	4.66667	67.609	-63	-43	-40.005	-27.305	48.4351	0.716401
5	121	89	762	7.24	4.7	74.849	-63	-24	-40.005	-15.24	42.8096	0.571946
5	122	89	766	2.54	4.73333	71.964	-63	-11	-40.005	-6.985	40.6102	0.564313
5	123	88	770	2.618	4.76667	68.867	-62	-1	-39.37	-0.635	39.3751	0.571756
5	124	78	769	6.382	4.8	71.233	-70	-2	-44.45	-1.27	44.4681	0.624263
5	125	72	769	3.81	4.83333	73.773	-76	2	-48.26	1.27	48.2767	0.654395
5	126	70	762	4.623	4.86667	75.856	-78	0	-49.53	0	49.53	0.652948
5	127	65	754	5.991	4.9	78.672	-75	4	-47.625	2.54	47.6927	0.606222
5	128	62	747	4.836	4.93333	74.35	-78	-3	-49.53	-1.905	49.5666	0.666666
5	129	65	743	3.175	4.96667	77.525	-71	-4	-45.085	-2.54	45.1565	0.582477
5	130	68	742	2.008	5	76.358	-64	-3	-40.64	-1.905	40.6846	0.532814
5	131	70	735	4.623	5.03333	78.141	-59	-10	-37.465	-6.35	37.9993	0.486292
5	132	70	730	3.175	5.06667	79.411	-42	-13	-26.67	-8.255	27.9183	0.351568
5	133	70	723	4.445	5.1	72.987	-24	-24	-15.24	-15.24	21.5526	0.295294
5	134	74	715	5.68	5.13333	66.958	-14	-34	-8.89	-21.59	23.3487	0.348706
5	135	78	710	4.066	5.16667	67.008	-8	-41	-5.08	-26.035	26.526	0.395863
5	136	78	706	2.54	5.2	67.752	-11	-56	-6.985	-35.56	36.2395	0.534885
5	137	80	706	1.27	5.23333	61.782	-9	-60	-5.715	-38.1	38.5262	0.623584
5	138	80	706	0	5.26667	59.242	-8	-64	-5.08	-40.64	40.9563	0.691338
5	139	80	706	0	5.3	56.624	2	-63	1.27	-40.005	40.0252	0.706858
5	140	81	706	0.635	5.33333	50.877	9	-63	5.715	-40.005	40.4112	0.794291
5	141	90	705	5.75	5.36667	52.817	20	-57	12.7	-36.195	38.3584	0.726251
5	142	96	698	5.854	5.4	54.048	31	-56	19.685	-35.56	40.645	0.752016
5	143	104	701	5.425	5.43333	53.482	42	-46	26.67	-29.21	39.5539	0.739575
5	144	108	702	2.618	5.46667	51.264	43	-41	27.305	-26.035	37.7278	0.73595
5	145	108	706	2.54	5.5	50.629	40	-36	25.4	-22.86	34.1722	0.674953
5	146	110	713	4.623	5.53333	53.244	40	-22	25.4	-13.97	28.9883	0.544442
5	147	110	718	3.175	5.56667	51.796	40	-12	25.4	-7.62	26.5184	0.511977
5	148	110	722	2.54	5.6	51.161	40	-1	25.4	-0.635	25.4079	0.496627
5	149	122	726	8.032	5.63333	54.748	48	11	30.48	6.985	31.2701	0.571165
5	150	122	730	2.54	5.66667	51.608	44	20	27.94	12.7	30.6909	0.594693
5	151	125	733	2.694	5.7	50.236	47	27	29.845	17.145	34.4191	0.685148
5	152	128	731	2.29	5.73333	49.986	48	25	30.48	15.875	34.3664	0.68752
5	153	138	730	6.382	5.76667	55.098	58	24	36.83	15.24	39.8586	0.723412
5	154	149	729	7.014	5.8	62.112	69	23	43.815	14.605	46.1851	0.743577
5	155	149	726	1.905	5.83333	64.017	68	20	43.18	12.7	45.0089	0.703078
5	156	153	719	5.12	5.86667	68.502	63	14	40.005	8.89	40.9809	0.598243
5	157	153	715	2.54	5.9	65.292	57	17	36.195	10.795	37.7705	0.578486
5	158	153	713	1.27	5.93333	60.708	49	12	31.115	7.62	32.0345	0.527681
5	159	152	713	0.635	5.96667	55.918	44	11	27.94	6.985	28.7999	0.515038
5	160	152	715	1.27	6	54.57	44	9	27.94	5.715	28.5185	0.522604
5	161	149	741	16.62	6.03333	68.65	39	28	24.765	17.78	30.4866	0.444088
5	162	148	750	5.75	6.06667	69.777	38	32	24.13	20.32	31.5461	0.452099
5	163	149	754	2.618	6.1	69.22	39	32	24.765	20.32	32.0345	0.462792
5	164	148	758	2.618	6.13333	69.298	26	32	16.51	20.32	26.1817	0.377814
5	165	148	761	1.905	6.16667	63.171	26	31	16.51	19.685	25.692	0.406706
5	166	149	765	2.618	6.2	63.249	24	32	15.24	20.32	25.4	0.401587
5	167	152	774	6.024	6.23333	66.579	24	43	15.24	27.305	31.2701	0.469669
5	168	150	779	3.42	6.26667	67.709	12	49	7.62	31.115	32.0345	0.47312
5	169	149	791	7.646	6.3	68.973	0	62	0	39.37	39.37	0.570803
5	170	148	791	0.635	6.33333	62.594	-1	65	-0.635	41.275	41.2799	0.659486
5	171	137	791	6.985	6.36667	67.674	-16	72	-10.16	45.72	46.8353	0.692072
5	172	129	783	7.184	6.4	69.738	-24	68	-15.24	43.18	45.7905	0.656608
5	173	125	778	4.066	6.43333	71.264	-28	65	-17.78	41.275	44.9417	0.630636
5	174	124	774	2.618	6.46667	72.612	-28	61	-17.78	38.735	42.6208	0.586966
5	175	126	773	1.42	6.5	73.397	-26	58	-16.51	36.83	40.3612	0.549903
5	176	125	769	2.618	6.53333	74.745	-24	28	-15.24	17.78	23.4176	0.3133
5	177	121	769	2.54	6.56667	60.665	-27	19	-17.145	12.065	20.9646	0.34558
5	178	122	767	1.42	6.6	56.335	-27	13	-17.145	8.255	19.0288	0.33778
5	179	121	766	0.898	6.63333	54.615	-27	8	-17.145	5.08	17.8818	0.327415
5	180	128	761	5.462	6.66667	57.459	-20	0	-12.7	0	12.7	0.221027
5	181	133	753	5.991	6.7	61.545	-16	-12	-10.16	-7.62	12.7	0.206353
5	182	134	750	2.008	6.73333	60.935	-18	-24	-11.43	-15.24	19.05	0.312628
5	183	138	747	3.175	6.76667	58.086	-12	-32	-7.62	-20.32	21.7018	0.373614
5	184	141	743	3.175	6.8	57.841	-8	-48	-5.08	-30.48	30.9004	0.534231
5	185	142	739	2.618	6.83333	52.813	-6	-52	-3.81	-33.02	33.2391	0.629373
5	186	142	733	3.81	6.86667	55.988	5	-58	3.175	-36.83	36.9666	0.660259
5	187	142	729	2.54	6.9	51.543	13	-54	8.255	-34.29	35.2697	0.684276
5	188	142	727	1.27	6.93333	45.629	17	-51	10.795	-32.385	34.1368	0.748138
5	189	141	723	2.618	6.96667	44.181	17	-51	10.795	-32.385	34.1368	0.772658
5	190	138	718	3.703	7	45.266	12	-55	7.62	-34.925	35.7466	0.789701
5	191	140	713	3.42	7.03333	47.266	15	-56	9.525	-35.56	36.8136	0.77886
5	192	142	711	1.796	7.06667	46.444	21	-58	13.335	-36.83	39.1698	0.843376
5	193	142	707	2.54	7.1	46.444	20	-60	12.7	-38.1	40.1609	0.864717
5	194	144	705	1.796	7.13333	46.82	23	-61	14.605	-38.735	41.3969	0.884172
5	195	144	701	2.54	7.16667	48.462	16	-60	10.16	-38.1	39.4314	0.813656
5	196	142	699	1.796	7.2	44.796	9	-54	5.715	-34.29	34.763	0.776029
5	197	140	699	1.27	7.23333	40.075	6	-51	3.81	-32.385	32.6083	0.813683
5	198	134	699	3.81	7.26667	41.877	-4	-48	-2.54	-30.48	30.5857	0.730369
5	199	134	699	0	7.3	38.702	-7	-44	-4.445	-27.94	28.2914	0.731005
5	200	133	701	1.42	7.33333	36.947	-9	-38	-5.715	-24.13	24.7975	0.671165
5	201	132	709	5.12	7.36667	39.449	-10	-24	-6.35	-15.24	16.51	0.418515
5	202	133	710	0.898	7.4	36.537	-9	-19	-5.715	-12.065	13.3501	0.365386
5	203	134	705	3.238	7.43333	37.235	-8	-22	-5.08	-13.97	14.865	0.39922
5	204	134	707	1.27	7.46667	37.235	-7	-16	-4.445	-10.16	11.0898	0.297833
5	205	133	707	0.635	7.5	35.252	-5	-11	-3.175	-6.985	7.67273	0.217654
5	206	132	707	0.635	7.53333	32.184	-8	-6	-5.08	-3.81	6.35	0.197303
5	207	132	707	0	7.56667	28.764	-10	-4	-6.35	-2.54	6.83916	0.237768
5	208	136	707	2.54	7.6	29.508	-6	0	-3.81	0	3.81	0.129118
5	209	136	710	1.905	7.63333	28.873	-8	5	-5.08	3.175	5.99058	0.20748
5	210	140	713	3.175	7.66667	30.252	-4	12	-2.54	7.62	8.03219	0.265509
5	211	141	714	0.898	7.7	28.61	-1	15	-0.635	9.525	9.54614	0.333665
5	212	142	715	0.898	7.73333	27.712	2	16	1.27	10.16	10.2391	0.369481
5	213	142	715	0	7.76667	26.442	8	16	5.08	10.16	11.3592	0.42959
5	214	145	713	2.29	7.8	24.922	11	14	6.985	8.89	11.3059	0.45365
5	215	145	710	1.905	7.83333	26.827	12	9	7.62	5.715	9.525	0.355053
5	216	146	710	0.635	7.86667	26.042	14	1	8.89	0.635	8.91265	0.342241
5	217	148	715	3.42	7.9	24.342	15	5	9.525	3.175	10.0402	0.412465
5	218	150	718	2.29	7.93333	25.734	16	13	10.16	8.255	13.0909	0.508699
5	219	154	721	3.175	7.96667	25.671	20	14	12.7	8.89	15.5023	0.603885
5	220	154	721	0	8	24.401	21	14	13.335	8.89	16.0267	0.656804
5	221	154	721	0	8.03333	23.766	22	14	13.97	8.89	16.5588	0.696742
5	222	157	721	1.905	8.06667	25.036	25	14	15.875	8.89	18.1947	0.726742
5	223	158	722	0.898	8.1	25.934	22	15	13.97	9.525	16.9082	0.65197
5	224	158	722	0	8.13333	23.394	22	12	13.97	7.62	15.9131	0.680219
5	225	161	729	4.836	8.16667	26.325	21	16	13.335	10.16	16.7645	0.636827
5	226	161	731	1.27	8.2	24.42	20	17	12.7	10.795	16.668	0.682555
5	227	161	729	1.27	8.23333	24.792	19	14	12.065	8.89	14.9865	0.604491
5	228	164	729	1.905	8.26667	25.799	22	14	13.97	8.89	16.5588	0.641838
5	229	162	727	1.796	8.3	27.595	17	14	10.795	8.89	13.9844	0.506774
5	230	161	725	1.42	8.33333	26.725	16	15	10.16	9.525	13.9266	0.521109
5	231	162	729	2.618	8.36667	27.438	16	19	10.16	12.065	15.7731	0.574862
5	232	162	729	0	8.4	26.803	14	14	8.89	8.89	12.5724	0.469065
5	233	162	729	0	8.43333	23.383	12	11	7.62	6.985	10.3371	0.442075
5	234	157	727	3.42	8.46667	24.513	3	6	1.905	3.81	4.25971	0.173773
5	235	153	734	5.12	8.5	26.458	-1	13	-0.635	8.255	8.27939	0.312926
5	236	152	734	0.635	8.53333	27.093	-2	13	-1.27	8.255	8.35212	0.308276
5	237	158	739	4.96	8.56667	32.053	1	18	0.635	11.43	11.4476	0.357147
5	238	165	739	4.445	8.6	34.593	7	17	4.445	10.795	11.6743	0.337477
5	239	169	738	2.618	8.63333	36.313	11	16	6.985	10.16	12.3295	0.339533
5	240	172	738	1.905	8.66667	38.218	11	9	6.985	5.715	9.02505	0.236146
5	241	172	737	0.635	8.7	34.017	11	6	6.985	3.81	7.95653	0.233899
5	242	173	734	2.008	8.73333	34.755	12	5	7.62	3.175	8.255	0.23752
5	243	173	731	1.905	8.76667	35.39	9	2	5.715	1.27	5.85441	0.165426
5	244	172	731	0.635	8.8	34.12	10	4	6.35	2.54	6.83916	0.200444
5	245	169	731	1.905	8.83333	34.229	8	6	5.08	3.81	6.35	0.185515
5	246	169	731	0	8.86667	32.809	7	2	4.445	1.27	4.62287	0.140902
5	247	168	733	1.42	8.9	31.611	6	4	3.81	2.54	4.57905	0.144856
5	248	168	735	1.27	8.93333	32.881	6	6	3.81	3.81	5.38815	0.163868
5	249	168	735	0	8.96667	32.881	11	8	6.985	5.08	8.63693	0.262672
5	250	168	737	1.27	9	30.731	15	3	9.525	1.905	9.71363	0.316086
5	251	172	738	2.618	9.03333	28.229	20	4	12.7	2.54	12.9515	0.458802
5	252	174	738	1.27	9.06667	28.864	16	-1	10.16	-0.635	10.1798	0.352682
5	253	178	738	2.54	9.1	26.444	13	-1	8.255	-0.635	8.27939	0.313091
5	254	180	739	1.42	9.13333	23.419	11	1	6.985	0.635	7.0138	0.299492
5	255	180	739	0	9.16667	20.801	8	1	5.08	0.635	5.11953	0.24612
5	256	182	739	1.27	9.2	20.166	10	2	6.35	1.27	6.47575	0.321122
5	257	182	739	0	9.23333	19.531	9	5	5.715	3.175	6.53773	0.334736
5	258	184	741	1.796	9.26667	19.319	11	10	6.985	6.35	9.43995	0.488636
5	259	184	741	0	9.3	17.414	12	10	7.62	6.35	9.91902	0.5696
5	260	185	742	0.898	9.33333	17.677	16	11	10.16	6.985	12.3295	0.697487
5	261	185	743	0.635	9.36667	16.407	16	12	10.16	7.62	12.7	0.77406
5	262	192	757	9.939	9.4	26.346	24	24	15.24	15.24	21.5526	0.81806
5	263	192	757	0	9.43333	24.926	24	22	15.24	13.97	20.6741	0.829419
5	264	192	758	0.635	9.46667	24.291	24	23	15.24	14.605	21.1084	0.868979
5	265	192	758	0	9.5	24.291	24	21	15.24	13.335	20.2504	0.83366
5	266	190	758	1.27	9.53333	24.291	18	20	11.43	12.7	17.0861	0.703392
5	267	190	758	0	9.56667	21.673	16	20	10.16	12.7	16.2639	0.750424
5	268	189	757	0.898	9.6	21.301	11	19	6.985	12.065	13.9411	0.654481
5	269	189	755	1.27	9.63333	20.031	9	16	5.715	10.16	11.6571	0.58195
5	270	188	755	0.635	9.66667	19.246	8	16	5.08	10.16	11.3592	0.590212
5	271	186	753	1.796	9.7	21.042	4	14	2.54	8.89	9.24574	0.439395
5	272	185	751	1.42	9.73333	21.192	3	12	1.905	7.62	7.85452	0.370636
5	273	185	751	0	9.76667	21.192	1	10	0.635	6.35	6.38167	0.301136
5	274	189	753	2.84	9.8	22.236	5	12	3.175	7.62	8.255	0.371245
5	275	189	753	0	9.83333	22.236	4	11	2.54	6.985	7.43248	0.334255
5	276	189	753	0	9.86667	21.338	4	10	2.54	6.35	6.83916	0.320515
5	277	189	753	0	9.9	20.703	-3	-4	-1.905	-2.54	3.175	0.153359
5	278	189	751	1.27	9.93333	12.034	-3	-6	-1.905	-3.81	4.25971	0.353973
5	279	189	753	1.27	9.96667	13.304	-3	-5	-1.905	-3.175	3.70265	0.278311
5	280	192	753	1.905	10	14.574	0	-5	0	-3.175	3.175	0.217854
5	281	193	751	1.42	10.0333	15.994	3	-7	1.905	-4.445	4.83602	0.302364
5	282	193	751	0	10.0667	14.724	3	-7	1.905	-4.445	4.83602	0.328444
5	283	193	751	0	10.1	14.724	4	-6	2.54	-3.81	4.57905	0.310992
5	284	193	753	1.27	10.1333	15.096	4	-2	2.54	-1.27	2.83981	0.188116
5	285	192	753	0.635	10.1667	14.461	4	-2	2.54	-1.27	2.83981	0.196377
5	286	192	753	0	10.2	13.826	6	0	3.81	0	3.81	0.275568
5	287	192	753	0	10.2333	12.03	7	2	4.445	1.27	4.62287	0.384278
5	288	193	751	1.42	10.2667	12.03	8	0	5.08	0	5.08	0.422278
5	289	193	750	0.635	10.3	12.665	4	-3	2.54	-1.905	3.175	0.250691
5	290	193	750	0	10.3333	9.825	4	-3	2.54	-1.905	3.175	0.323155
5	291	193	747	1.905	10.3667	11.73	4	-6	2.54	-3.81	4.57905	0.390371
5	292	193	747	0	10.4	11.73	4	-6	2.54	-3.81	4.57905	0.390371
5	293	192	746	0.898	10.4333	12.628	3	-5	1.905	-3.175	3.70265	0.29321
5	294	190	746	1.27	10.4667	12.628	1	-7	0.635	-4.445	4.49013	0.355569
5	295	189	745	0.898	10.5	12.256	-3	-8	-1.905	-5.08	5.42544	0.442676
5	296	188	745	0.635	10.5333	10.986	-5	-6	-3.175	-3.81	4.95951	0.451439
5	297	186	743	1.796	10.5667	11.362	-7	-8	-4.445	-5.08	6.75014	0.594098
5	298	186	742	0.635	10.6	11.997	-7	-9	-4.445	-5.715	7.24011	0.603494
5	299	186	743	0.635	10.6333	12.632	-7	-10	-4.445	-6.35	7.75116	0.613613
5	300	186	745	1.27	10.6667	12.632	-6	-8	-3.81	-5.08	6.35	0.502692
5	301	188	747	1.796	10.7	13.793	-4	-6	-2.54	-3.81	4.57905	0.331984
5	302	189	750	2.008	10.7333	15.801	-3	-3	-1.905	-1.905	2.69408	0.1705
5	303	190	750	0.635	10.7667	16.436	-3	-1	-1.905	-0.635	2.00805	0.122174
5	304	190	751	0.635	10.8	15.651	-3	1	-1.905	0.635	2.00805	0.128301
5	305	193	747	3.175	10.8333	18.191	0	-3	0	-1.905	1.905	0.104722
5	306	193	747	0	10.8667	18.191	0	0	0	0	0	0
5	307	193	746	0.635	10.9	16.921	0	-1	0	-0.635	0.635	0.0375273
5	308	193	746	0	10.9333	16.921	1	0	0.635	0	0.635	0.0375273
5	309	193	746	0	10.9667	16.023	3	0	1.905	0	1.905	0.118892
5	310	189	747	2.618	11	17.371	0	2	0	1.27	1.27	0.0731104
6	10	763	568	0	1	NA	NA	NA	NA	NA	NA	NA
6	11	762	567	0.898	1.03333	NA	NA	NA	NA	NA	NA	NA
6	12	762	567	0	1.06667	NA	NA	NA	NA	NA	NA	NA
6	13	762	567	0	1.1	NA	NA	NA	NA	NA	NA	NA
6	14	764	567	1.27	1.13333	NA	NA	NA	NA	NA	NA	NA
6	15	764	567	0	1.16667	NA	NA	NA	NA	NA	NA	NA
6	16	764	566	0.635	1.2	NA	NA	NA	NA	NA	NA	NA
6	17	764	566	0	1.23333	NA	NA	NA	NA	NA	NA	NA
6	18	766	567	1.42	1.26667	NA	NA	NA	NA	NA	NA	NA
6	19	766	567	0	1.3	NA	NA	NA	NA	NA	NA	NA
6	20	766	565	1.27	1.33333	NA	NA	NA	NA	NA	NA	NA
6	21	766	565	0	1.36667	NA	NA	NA	NA	NA	NA	NA
6	22	765	564	0.898	1.4	NA	NA	NA	NA	NA	NA	NA
6	23	765	564	0	1.43333	NA	NA	NA	NA	NA	NA	NA
6	24	765	564	0	1.46667	NA	NA	NA	NA	NA	NA	NA
6	25	765	563	0.635	1.5	7.026	2	-5	1.27	-3.175	3.41958	0.486704
6	26	766	563	0.635	1.53333	7.661	4	-4	2.54	-2.54	3.5921	0.468882
6	27	768	564	1.42	1.56667	8.183	6	-3	3.81	-1.905	4.25971	0.520556
6	28	769	563	0.898	1.6	9.081	7	-4	4.445	-2.54	5.11953	0.563763
6	29	769	563	0	1.63333	9.081	5	-4	3.175	-2.54	4.06598	0.447746
6	30	768	563	0.635	1.66667	8.446	4	-4	2.54	-2.54	3.5921	0.425302
6	31	768	563	0	1.7	8.446	4	-3	2.54	-1.905	3.175	0.375918
6	32	767	563	0.635	1.73333	8.446	3	-3	1.905	-1.905	2.69408	0.318977
6	33	767	563	0	1.76667	8.446	1	-4	0.635	-2.54	2.61817	0.30999
6	34	767	563	0	1.8	7.026	1	-4	0.635	-2.54	2.61817	0.37264
6	35	766	564	0.898	1.83333	7.924	0	-1	0	-0.635	0.635	0.0801363
6	36	766	565	0.635	1.86667	7.289	0	0	0	0	0	0
6	37	766	565	0	1.9	7.289	1	1	0.635	0.635	0.898026	0.123203
6	38	766	565	0	1.93333	6.391	1	1	0.635	0.635	0.898026	0.140514
6	39	767	565	0.635	1.96667	7.026	2	1	1.27	0.635	1.4199	0.202093
6	40	767	565	0	2	7.026	2	2	1.27	1.27	1.79605	0.255629
6	41	767	565	0	2.03333	6.391	1	2	0.635	1.27	1.4199	0.222172
6	42	767	565	0	2.06667	5.756	-1	1	-0.635	0.635	0.898026	0.156016
6	43	767	565	0	2.1	4.336	-2	2	-1.27	1.27	1.79605	0.414218
6	44	767	565	0	2.13333	3.438	-2	2	-1.27	1.27	1.79605	0.522412
6	45	767	565	0	2.16667	3.438	-1	2	-0.635	1.27	1.4199	0.413003
6	46	766	562	2.008	2.2	4.811	-2	-1	-1.27	-0.635	1.4199	0.295137
6	47	767	564	1.42	2.23333	6.231	0	1	0	0.635	0.635	0.10191
6	48	768	566	1.42	2.26667	7.016	1	3	0.635	1.905	2.00805	0.28621
6	49	768	565	0.635	2.3	7.651	1	2	0.635	1.27	1.4199	0.185584
6	50	769	565	0.635	2.33333	8.286	3	1	1.905	0.635	2.00805	0.242342
6	51	769	565	0	2.36667	7.388	3	0	1.905	0	1.905	0.257851
6	52	769	565	0	2.4	6.753	3	0	1.905	0	1.905	0.282097
6	53	769	565	0	2.43333	6.753	3	0	1.905	0	1.905	0.282097
6	54	768	565	0.635	2.46667	7.388	1	0	0.635	0	0.635	0.0859502
6	55	768	565	0	2.5	6.753	1	0	0.635	0	0.635	0.0940323
6	56	768	565	0	2.53333	6.753	1	0	0.635	0	0.635	0.0940323
6	57	768	565	0	2.56667	6.753	1	0	0.635	0	0.635	0.0940323
6	58	768	564	0.635	2.6	7.388	1	-1	0.635	-0.635	0.898026	0.121552
6	59	769	564	0.635	2.63333	8.023	2	-1	1.27	-0.635	1.4199	0.176979
6	60	769	564	0	2.66667	8.023	2	-1	1.27	-0.635	1.4199	0.176979
6	61	769	564	0	2.7	8.023	3	2	1.905	1.27	2.28953	0.28537
6	62	769	565	0.635	2.73333	6.65	2	1	1.27	0.635	1.4199	0.213519
6	63	770	565	0.635	2.76667	5.865	2	-1	1.27	-0.635	1.4199	0.242098
6	64	770	565	0	2.8	4.445	2	0	1.27	0	1.27	0.285714
6	65	769	566	0.898	2.83333	4.708	0	1	0	0.635	0.635	0.134877
6	66	769	567	0.635	2.86667	4.708	0	2	0	1.27	1.27	0.269754
6	67	769	567	0	2.9	4.708	0	2	0	1.27	1.27	0.269754
6	68	769	566	0.635	2.93333	5.343	0	1	0	0.635	0.635	0.118847
6	69	769	565	0.635	2.96667	5.978	1	0	0.635	0	0.635	0.106223
6	70	769	565	0	3	5.343	1	0	0.635	0	0.635	0.118847
6	71	769	565	0	3.03333	5.343	1	0	0.635	0	0.635	0.118847
6	72	769	565	0	3.06667	5.343	1	0	0.635	0	0.635	0.118847
6	73	769	565	0	3.1	5.343	1	1	0.635	0.635	0.898026	0.168075
6	74	769	565	0	3.13333	4.708	0	1	0	0.635	0.635	0.134877
6	75	769	564	0.635	3.16667	4.708	0	0	0	0	0	0
6	76	770	563	0.898	3.2	5.606	1	-1	0.635	-0.635	0.898026	0.16019
6	77	770	563	0	3.23333	5.606	1	-2	0.635	-1.27	1.4199	0.253283
6	78	770	563	0	3.26667	4.971	0	-2	0	-1.27	1.27	0.255482
6	79	769	563	0.635	3.3	4.971	-1	-2	-0.635	-1.27	1.4199	0.285637
6	80	769	563	0	3.33333	4.971	0	-3	0	-1.905	1.905	0.383223
6	81	769	563	0	3.36667	4.073	0	-4	0	-2.54	2.54	0.623619
6	82	770	564	0.898	3.4	4.336	1	-3	0.635	-1.905	2.00805	0.46311
6	83	770	564	0	3.43333	4.336	1	-2	0.635	-1.27	1.4199	0.327468
6	84	770	564	0	3.46667	3.701	1	-1	0.635	-0.635	0.898026	0.242644
6	85	770	564	0	3.5	3.066	1	-1	0.635	-0.635	0.898026	0.292898
6	86	770	564	0	3.53333	3.066	1	-1	0.635	-0.635	0.898026	0.292898
6	87	769	565	0.898	3.56667	3.964	0	0	0	0	0	0
6	88	769	564	0.635	3.6	4.599	0	-1	0	-0.635	0.635	0.138073
6	89	769	563	0.635	3.63333	5.234	0	-2	0	-1.27	1.27	0.242644
6	90	769	563	0	3.66667	5.234	0	-1	0	-0.635	0.635	0.121322
6	91	769	563	0	3.7	4.599	-1	0	-0.635	0	0.635	0.138073
6	92	769	563	0	3.73333	3.701	-1	0	-0.635	0	0.635	0.171575
6	93	769	563	0	3.76667	3.701	-1	0	-0.635	0	0.635	0.171575
6	94	771	563	1.27	3.8	4.971	2	0	1.27	0	1.27	0.255482
6	95	771	563	0	3.83333	4.336	2	0	1.27	0	1.27	0.292897
6	96	771	563	0	3.86667	4.336	2	0	1.27	0	1.27	0.292897
6	97	771	563	0	3.9	4.336	1	-1	0.635	-0.635	0.898026	0.207109
6	98	771	563	0	3.93333	3.438	1	-1	0.635	-0.635	0.898026	0.261206
6	99	771	563	0	3.96667	3.438	1	-1	0.635	-0.635	0.898026	0.261206
6	100	771	563	0	4	3.438	1	-1	0.635	-0.635	0.898026	0.261206
6	101	771	563	0	4.03333	3.438	1	-1	0.635	-0.635	0.898026	0.261206
6	102	771	563	0	4.06667	3.438	2	-2	1.27	-1.27	1.79605	0.522412
6	103	770	564	0.898	4.1	3.438	1	0	0.635	0	0.635	0.1847
6	104	770	564	0	4.13333	2.803	1	1	0.635	0.635	0.898026	0.32038
6	105	770	564	0	4.16667	2.168	1	1	0.635	0.635	0.898026	0.414218
6	106	770	564	0	4.2	2.168	1	1	0.635	0.635	0.898026	0.414218
6	107	770	564	0	4.23333	2.168	1	1	0.635	0.635	0.898026	0.414218
6	108	769	564	0.635	4.26667	2.803	0	1	0	0.635	0.635	0.226543
6	109	769	564	0	4.3	2.803	-2	1	-1.27	0.635	1.4199	0.506566
6	110	769	564	0	4.33333	1.533	-2	1	-1.27	0.635	1.4199	0.926225
6	111	769	564	0	4.36667	1.533	-2	1	-1.27	0.635	1.4199	0.926225
6	112	769	564	0	4.4	1.533	-2	1	-1.27	0.635	1.4199	0.926225
6	113	769	564	0	4.43333	1.533	-2	1	-1.27	0.635	1.4199	0.926225
6	114	768	563	0.898	4.46667	2.431	-3	0	-1.905	0	1.905	0.783628
6	115	769	563	0.635	4.5	3.066	-2	0	-1.27	0	1.27	0.41422
6	116	769	562	0.635	4.53333	3.701	-2	-1	-1.27	-0.635	1.4199	0.383654
6	117	769	562	0	4.56667	3.701	-2	-1	-1.27	-0.635	1.4199	0.383654
6	118	770	563	0.898	4.6	4.599	0	-1	0	-0.635	0.635	0.138073
6	119	771	564	0.898	4.63333	4.599	1	0	0.635	0	0.635	0.138073
6	120	771	564	0	4.66667	4.599	1	0	0.635	0	0.635	0.138073
6	121	772	564	0.635	4.7	5.234	2	0	1.27	0	1.27	0.242644
6	122	772	563	0.635	4.73333	5.869	2	-1	1.27	-0.635	1.4199	0.241933
6	123	771	563	0.635	4.76667	6.504	2	-1	1.27	-0.635	1.4199	0.218312
6	124	771	562	0.635	4.8	6.504	2	-2	1.27	-1.27	1.79605	0.276146
6	125	770	562	0.635	4.83333	7.139	1	-2	0.635	-1.27	1.4199	0.198894
6	126	770	562	0	4.86667	7.139	1	-2	0.635	-1.27	1.4199	0.198894
6	127	769	562	0.635	4.9	7.774	0	-2	0	-1.27	1.27	0.163365
6	128	768	562	0.635	4.93333	8.409	-1	-2	-0.635	-1.27	1.4199	0.168855
6	129	768	562	0	4.96667	8.409	0	-1	0	-0.635	0.635	0.0755143
6	130	768	562	0	5	7.511	-1	-1	-0.635	-0.635	0.898026	0.119561
6	131	768	562	0	5.03333	6.876	-1	0	-0.635	0	0.635	0.0923502
6	132	768	562	0	5.06667	6.241	-1	0	-0.635	0	0.635	0.101747
6	133	768	562	0	5.1	6.241	-2	-1	-1.27	-0.635	1.4199	0.227512
6	134	768	562	0	5.13333	5.343	-3	-2	-1.905	-1.27	2.28953	0.428509
6	135	768	562	0	5.16667	4.445	-3	-2	-1.905	-1.27	2.28953	0.515079
6	136	768	562	0	5.2	4.445	-4	-2	-2.54	-1.27	2.83981	0.638877
6	137	768	562	0	5.23333	3.81	-4	-1	-2.54	-0.635	2.61817	0.687184
6	138	768	562	0	5.26667	3.175	-3	-1	-1.905	-0.635	2.00805	0.632456
6	139	768	562	0	5.3	2.54	-3	0	-1.905	0	1.905	0.75
6	140	768	562	0	5.33333	1.905	-2	0	-1.27	0	1.27	0.666667
6	141	768	563	0.635	5.36667	1.905	-2	1	-1.27	0.635	1.4199	0.745356
6	142	768	563	0	5.4	1.905	-1	1	-0.635	0.635	0.898026	0.471405
6	143	768	563	0	5.43333	1.27	0	1	0	0.635	0.635	0.5
6	144	768	563	0	5.46667	0.635	0	1	0	0.635	0.635	1
6	145	768	563	0	5.5	0.635	0	1	0	0.635	0.635	1
6	146	769	564	0.898	5.53333	1.533	1	2	0.635	1.27	1.4199	0.926225
6	147	769	564	0	5.56667	1.533	1	2	0.635	1.27	1.4199	0.926225
6	148	770	564	0.635	5.6	2.168	2	2	1.27	1.27	1.79605	0.828437
6	149	770	564	0	5.63333	2.168	2	2	1.27	1.27	1.79605	0.828437
6	150	770	563	0.635	5.66667	2.803	2	1	1.27	0.635	1.4199	0.506566
6	151	770	563	0	5.7	2.803	2	1	1.27	0.635	1.4199	0.506566
6	152	770	563	0	5.73333	2.803	2	1	1.27	0.635	1.4199	0.506566
6	153	770	563	0	5.76667	2.803	2	1	1.27	0.635	1.4199	0.506566
6	154	770	562	0.635	5.8	3.438	2	0	1.27	0	1.27	0.369401
6	155	770	562	0	5.83333	3.438	2	0	1.27	0	1.27	0.369401
6	156	770	562	0	5.86667	3.438	2	-1	1.27	-0.635	1.4199	0.413003
6	157	770	562	0	5.9	2.803	2	-1	1.27	-0.635	1.4199	0.506566
6	158	770	562	0	5.93333	2.803	2	-1	1.27	-0.635	1.4199	0.506566
6	159	770	562	0	5.96667	2.803	2	-1	1.27	-0.635	1.4199	0.506566
6	160	770	562	0	6	2.803	2	-1	1.27	-0.635	1.4199	0.506566
6	161	770	562	0	6.03333	2.803	1	-2	0.635	-1.27	1.4199	0.506566
6	162	769	562	0.635	6.06667	2.54	0	-2	0	-1.27	1.27	0.5
6	163	769	562	0	6.1	2.54	-1	-2	-0.635	-1.27	1.4199	0.559017
6	164	769	562	0	6.13333	1.905	-1	-2	-0.635	-1.27	1.4199	0.745356
6	165	769	562	0	6.16667	1.905	-1	-1	-0.635	-0.635	0.898026	0.471405
6	166	769	562	0	6.2	1.27	-1	-1	-0.635	-0.635	0.898026	0.707107
6	167	769	561	0.635	6.23333	1.905	-1	-2	-0.635	-1.27	1.4199	0.745356
6	168	769	561	0	6.26667	1.905	-1	-2	-0.635	-1.27	1.4199	0.745356
6	169	769	561	0	6.3	1.905	-1	-1	-0.635	-0.635	0.898026	0.471405
6	170	769	561	0	6.33333	1.27	-1	-1	-0.635	-0.635	0.898026	0.707107
6	171	769	561	0	6.36667	1.27	-1	-1	-0.635	-0.635	0.898026	0.707107
6	172	769	561	0	6.4	1.27	-1	-1	-0.635	-0.635	0.898026	0.707107
6	173	769	561	0	6.43333	1.27	-1	-1	-0.635	-0.635	0.898026	0.707107
6	174	769	561	0	6.46667	1.27	-1	-1	-0.635	-0.635	0.898026	0.707107
6	175	769	561	0	6.5	1.27	-1	-1	-0.635	-0.635	0.898026	0.707107
6	176	769	562	0.635	6.53333	1.905	-1	0	-0.635	0	0.635	0.333333
6	177	770	563	0.898	6.56667	2.803	1	1	0.635	0.635	0.898026	0.32038
6	178	770	563	0	6.6	2.168	1	1	0.635	0.635	0.898026	0.414218
6	179	770	563	0	6.63333	2.168	1	1	0.635	0.635	0.898026	0.414218
6	180	770	562	0.635	6.66667	2.803	1	0	0.635	0	0.635	0.226543
6	181	770	562	0	6.7	2.803	1	0	0.635	0	0.635	0.226543
6	182	770	562	0	6.73333	2.803	1	1	0.635	0.635	0.898026	0.32038
6	183	770	562	0	6.76667	2.168	1	1	0.635	0.635	0.898026	0.414218
6	184	770	562	0	6.8	2.168	1	1	0.635	0.635	0.898026	0.414218
6	185	770	561	0.635	6.83333	2.803	1	0	0.635	0	0.635	0.226543
6	186	770	561	0	6.86667	2.803	1	0	0.635	0	0.635	0.226543
6	187	769	561	0.635	6.9	3.438	0	0	0	0	0	0
6	188	769	561	0	6.93333	3.438	0	0	0	0	0	0
6	189	769	562	0.635	6.96667	4.073	0	1	0	0.635	0.635	0.155905
6	190	769	562	0	7	4.073	0	1	0	0.635	0.635	0.155905
6	191	769	563	0.635	7.03333	4.708	0	1	0	0.635	0.635	0.134877
6	192	769	563	0	7.06667	4.073	-1	0	-0.635	0	0.635	0.155905
6	193	769	563	0	7.1	3.175	-1	0	-0.635	0	0.635	0.2
6	194	769	563	0	7.13333	3.175	-1	0	-0.635	0	0.635	0.2
6	195	769	563	0	7.16667	3.175	-1	1	-0.635	0.635	0.898026	0.282843
6	196	769	562	0.635	7.2	3.175	-1	0	-0.635	0	0.635	0.2
6	197	769	562	0	7.23333	3.175	-1	0	-0.635	0	0.635	0.2
6	198	769	562	0	7.26667	3.175	-1	0	-0.635	0	0.635	0.2
6	199	768	562	0.635	7.3	3.81	-2	0	-1.27	0	1.27	0.333333
6	200	768	562	0	7.33333	3.81	-2	1	-1.27	0.635	1.4199	0.372678
6	201	768	562	0	7.36667	3.175	-2	1	-1.27	0.635	1.4199	0.447214
6	202	768	562	0	7.4	3.175	-1	1	-0.635	0.635	0.898026	0.282843
6	203	768	561	0.635	7.43333	3.175	-1	0	-0.635	0	0.635	0.2
6	204	768	561	0	7.46667	3.175	-1	-1	-0.635	-0.635	0.898026	0.282843
6	205	769	562	0.898	7.5	3.438	0	0	0	0	0	0
6	206	769	562	0	7.53333	3.438	0	-1	0	-0.635	0.635	0.1847
6	207	769	562	0	7.56667	2.803	0	-1	0	-0.635	0.635	0.226543
6	208	770	563	0.898	7.6	3.701	1	0	0.635	0	0.635	0.171575
6	209	770	563	0	7.63333	3.701	1	0	0.635	0	0.635	0.171575
6	210	770	563	0	7.66667	3.701	1	0	0.635	0	0.635	0.171575
6	211	770	563	0	7.7	3.701	1	1	0.635	0.635	0.898026	0.242644
6	212	772	563	1.27	7.73333	4.336	3	1	1.905	0.635	2.00805	0.46311
6	213	772	563	0	7.76667	4.336	3	1	1.905	0.635	2.00805	0.46311
6	214	772	562	0.635	7.8	4.971	4	0	2.54	0	2.54	0.510964
6	215	772	562	0	7.83333	4.336	4	0	2.54	0	2.54	0.585793
6	216	772	561	0.635	7.86667	4.971	4	-1	2.54	-0.635	2.61817	0.526689
6	217	772	561	0	7.9	4.971	4	-1	2.54	-0.635	2.61817	0.526689
6	218	772	561	0	7.93333	4.971	4	0	2.54	0	2.54	0.510964
6	219	772	561	0	7.96667	4.336	4	0	2.54	0	2.54	0.585793
6	220	772	561	0	8	4.336	3	-1	1.905	-0.635	2.00805	0.46311
6	221	772	562	0.635	8.03333	4.073	3	0	1.905	0	1.905	0.467714
6	222	772	562	0	8.06667	4.073	3	0	1.905	0	1.905	0.467714
6	223	772	562	0	8.1	4.073	2	-1	1.27	-0.635	1.4199	0.348614
6	224	771	562	0.635	8.13333	3.81	1	-1	0.635	-0.635	0.898026	0.235702
6	225	771	562	0	8.16667	3.81	1	-1	0.635	-0.635	0.898026	0.235702
6	226	771	562	0	8.2	3.81	1	-1	0.635	-0.635	0.898026	0.235702
6	227	771	563	0.635	8.23333	4.445	-1	0	-0.635	0	0.635	0.142857
6	228	771	563	0	8.26667	3.175	-1	0	-0.635	0	0.635	0.2
6	229	770	563	0.635	8.3	3.81	-2	1	-1.27	0.635	1.4199	0.372678
6	230	770	563	0	8.33333	3.175	-2	1	-1.27	0.635	1.4199	0.447214
6	231	770	563	0	8.36667	3.175	-2	2	-1.27	1.27	1.79605	0.565685
6	232	770	563	0	8.4	2.54	-2	2	-1.27	1.27	1.79605	0.707107
6	233	770	563	0	8.43333	2.54	-2	2	-1.27	1.27	1.79605	0.707107
6	234	770	563	0	8.46667	2.54	-2	2	-1.27	1.27	1.79605	0.707107
6	235	770	563	0	8.5	2.54	-2	2	-1.27	1.27	1.79605	0.707107
6	236	770	563	0	8.53333	2.54	-2	1	-1.27	0.635	1.4199	0.559017
6	237	770	563	0	8.56667	1.905	-2	1	-1.27	0.635	1.4199	0.745356
6	238	770	563	0	8.6	1.905	-2	1	-1.27	0.635	1.4199	0.745356
6	239	770	563	0	8.63333	1.905	-1	1	-0.635	0.635	0.898026	0.471405
6	240	770	564	0.635	8.66667	1.905	-1	2	-0.635	1.27	1.4199	0.745356
6	241	770	564	0	8.7	1.905	-1	2	-0.635	1.27	1.4199	0.745356
6	242	770	564	0	8.73333	1.905	-1	1	-0.635	0.635	0.898026	0.471405
6	243	770	564	0	8.76667	1.27	-1	1	-0.635	0.635	0.898026	0.707107
6	244	770	564	0	8.8	1.27	0	1	0	0.635	0.635	0.5
6	245	770	564	0	8.83333	0.635	0	1	0	0.635	0.635	1
6	246	770	564	0	8.86667	0.635	0	1	0	0.635	0.635	1
6	247	771	563	0.898	8.9	1.533	1	0	0.635	0	0.635	0.41422
6	248	771	563	0	8.93333	1.533	1	0	0.635	0	0.635	0.41422
6	249	771	563	0	8.96667	1.533	1	0	0.635	0	0.635	0.41422
6	250	771	563	0	9	1.533	1	0	0.635	0	0.635	0.41422
6	251	773	561	1.796	9.03333	3.329	3	-2	1.905	-1.27	2.28953	0.687752
6	252	773	561	0	9.06667	3.329	3	-2	1.905	-1.27	2.28953	0.687752
6	253	773	561	0	9.1	3.329	3	-2	1.905	-1.27	2.28953	0.687752
6	254	773	561	0	9.13333	3.329	3	-2	1.905	-1.27	2.28953	0.687752
6	255	773	561	0	9.16667	3.329	3	-3	1.905	-1.905	2.69408	0.809275
6	256	773	561	0	9.2	2.694	3	-3	1.905	-1.905	2.69408	1.00003
6	257	774	561	0.635	9.23333	3.329	4	-3	2.54	-1.905	3.175	0.95374
6	258	774	561	0	9.26667	3.329	4	-3	2.54	-1.905	3.175	0.95374
6	259	775	560	0.898	9.3	4.227	5	-4	3.175	-2.54	4.06598	0.961908
6	260	777	558	1.796	9.33333	6.023	7	-6	4.445	-3.81	5.85441	0.972009
6	261	777	558	0	9.36667	6.023	7	-6	4.445	-3.81	5.85441	0.972009
6	262	777	558	0	9.4	6.023	6	-5	3.81	-3.175	4.95951	0.823428
6	263	778	556	1.42	9.43333	6.545	7	-7	4.445	-4.445	6.28618	0.960455
6	264	778	556	0	9.46667	6.545	7	-7	4.445	-4.445	6.28618	0.960455
6	265	778	556	0	9.5	6.545	7	-7	4.445	-4.445	6.28618	0.960455
6	266	777	555	0.898	9.53333	7.443	4	-6	2.54	-3.81	4.57905	0.615216
6	267	777	555	0	9.56667	5.647	4	-6	2.54	-3.81	4.57905	0.810882
6	268	777	555	0	9.6	5.647	4	-6	2.54	-3.81	4.57905	0.810882
6	269	777	555	0	9.63333	5.647	4	-6	2.54	-3.81	4.57905	0.810882
6	270	777	555	0	9.66667	5.647	4	-6	2.54	-3.81	4.57905	0.810882
6	271	776	554	0.898	9.7	6.545	3	-7	1.905	-4.445	4.83602	0.738887
6	272	776	553	0.635	9.73333	7.18	2	-8	1.27	-5.08	5.23634	0.729296
6	273	776	553	0	9.76667	6.545	2	-8	1.27	-5.08	5.23634	0.800053
6	274	776	553	0	9.8	6.545	1	-7	0.635	-4.445	4.49013	0.686039
6	275	776	553	0	9.83333	5.647	-1	-5	-0.635	-3.175	3.23788	0.57338
6	276	776	553	0	9.86667	3.851	-1	-5	-0.635	-3.175	3.23788	0.840789
6	277	776	552	0.635	9.9	4.486	-1	-6	-0.635	-3.81	3.86255	0.861024
6	278	776	551	0.635	9.93333	5.121	-2	-5	-1.27	-3.175	3.41958	0.667756
6	279	776	551	0	9.96667	3.701	-2	-5	-1.27	-3.175	3.41958	0.923961
6	280	776	551	0	10	3.701	-2	-5	-1.27	-3.175	3.41958	0.923961
6	281	776	552	0.635	10.0333	4.336	-1	-3	-0.635	-1.905	2.00805	0.46311
6	282	777	552	0.635	10.0667	4.073	0	-3	0	-1.905	1.905	0.467714
6	283	777	552	0	10.1	4.073	0	-3	0	-1.905	1.905	0.467714
6	284	777	553	0.635	10.1333	4.708	0	-2	0	-1.27	1.27	0.269754
6	285	777	553	0	10.1667	4.708	0	-2	0	-1.27	1.27	0.269754
6	286	777	553	0	10.2	4.708	1	-1	0.635	-0.635	0.898026	0.190745
6	287	778	553	0.635	10.2333	4.445	2	0	1.27	0	1.27	0.285714
6	288	778	553	0	10.2667	3.81	2	0	1.27	0	1.27	0.333333
6	289	778	553	0	10.3	3.81	2	0	1.27	0	1.27	0.333333
6	290	778	553	0	10.3333	3.81	2	0	1.27	0	1.27	0.333333
6	291	779	553	0.635	10.3667	4.445	3	0	1.905	0	1.905	0.428571
6	292	779	552	0.635	10.4	5.08	3	0	1.905	0	1.905	0.375
6	293	779	552	0	10.4333	4.445	3	1	1.905	0.635	2.00805	0.451754
6	294	779	552	0	10.4667	3.81	3	1	1.905	0.635	2.00805	0.527046
6	295	779	552	0	10.5	3.81	3	1	1.905	0.635	2.00805	0.527046
6	296	779	552	0	10.5333	3.81	3	0	1.905	0	1.905	0.5
6	297	779	552	0	10.5667	3.175	2	0	1.27	0	1.27	0.4
6	298	779	552	0	10.6	2.54	2	0	1.27	0	1.27	0.5
6	299	780	552	0.635	10.6333	3.175	3	-1	1.905	-0.635	2.00805	0.632456
6	300	783	551	2.008	10.6667	4.548	6	-2	3.81	-1.27	4.01609	0.883046
6	301	781	550	1.42	10.7	5.968	4	-3	2.54	-1.905	3.175	0.532004
6	302	780	551	0.898	10.7333	6.866	2	-2	1.27	-1.27	1.79605	0.261586
6	303	780	551	0	10.7667	6.231	2	-2	1.27	-1.27	1.79605	0.288244
6	304	780	551	0	10.8	6.231	2	-2	1.27	-1.27	1.79605	0.288244
6	305	780	551	0	10.8333	6.231	2	-2	1.27	-1.27	1.79605	0.288244
6	306	780	551	0	10.8667	6.231	1	-2	0.635	-1.27	1.4199	0.227877
6	307	780	551	0	10.9	5.596	1	-1	0.635	-0.635	0.898026	0.160476
6	308	780	551	0	10.9333	4.961	1	-1	0.635	-0.635	0.898026	0.181017
6	309	780	551	0	10.9667	4.961	1	-1	0.635	-0.635	0.898026	0.181017
6	310	780	551	0	11	4.961	1	-1	0.635	-0.635	0.898026	0.181017
7	10	811	585	0	1	NA	NA	NA	NA	NA	NA	NA
7	11	811	585	0	1.03333	NA	NA	NA	NA	NA	NA	NA
7	12	814	586	2.008	1.06667	NA	NA	NA	NA	NA	NA	NA
7	13	814	585	0.635	1.1	NA	NA	NA	NA	NA	NA	NA
7	14	814	585	0	1.13333	NA	NA	NA	NA	NA	NA	NA
7	15	814	585	0	1.16667	NA	NA	NA	NA	NA	NA	NA
7	16	813	585	0.635	1.2	NA	NA	NA	NA	NA	NA	NA
7	17	813	583	1.27	1.23333	NA	NA	NA	NA	NA	NA	NA
7	18	813	583	0	1.26667	NA	NA	NA	NA	NA	NA	NA
7	19	812	584	0.898	1.3	NA	NA	NA	NA	NA	NA	NA
7	20	812	583	0.635	1.33333	NA	NA	NA	NA	NA	NA	NA
7	21	812	583	0	1.36667	NA	NA	NA	NA	NA	NA	NA
7	22	812	583	0	1.4	NA	NA	NA	NA	NA	NA	NA
7	23	812	583	0	1.43333	NA	NA	NA	NA	NA	NA	NA
7	24	812	583	0	1.46667	NA	NA	NA	NA	NA	NA	NA
7	25	812	584	0.635	1.5	6.716	1	-1	0.635	-0.635	0.898026	0.133714
7	26	812	584	0	1.53333	6.716	1	-1	0.635	-0.635	0.898026	0.133714
7	27	812	584	0	1.56667	6.716	-2	-2	-1.27	-1.27	1.79605	0.267429
7	28	814	584	1.27	1.6	5.978	0	-1	0	-0.635	0.635	0.106223
7	29	814	585	0.635	1.63333	5.978	0	0	0	0	0	0
7	30	814	585	0	1.66667	5.978	0	0	0	0	0	0
7	31	814	584	0.635	1.7	6.613	1	-1	0.635	-0.635	0.898026	0.135797
7	32	814	584	0	1.73333	5.978	1	1	0.635	0.635	0.898026	0.150222
7	33	816	585	1.42	1.76667	6.128	3	2	1.905	1.27	2.28953	0.373617
7	34	816	585	0	1.8	6.128	4	1	2.54	0.635	2.61817	0.427247
7	35	817	585	0.635	1.83333	5.865	5	2	3.175	1.27	3.41958	0.583049
7	36	818	586	0.898	1.86667	6.128	6	3	3.81	1.905	4.25971	0.695122
7	37	818	586	0	1.9	6.128	6	3	3.81	1.905	4.25971	0.695122
7	38	818	586	0	1.93333	6.128	6	3	3.81	1.905	4.25971	0.695122
7	39	818	586	0	1.96667	6.128	6	3	3.81	1.905	4.25971	0.695122
7	40	818	586	0	2	6.128	6	2	3.81	1.27	4.01609	0.655368
7	41	818	586	0	2.03333	5.493	6	2	3.81	1.27	4.01609	0.731129
7	42	820	587	1.42	2.06667	6.913	8	3	5.08	1.905	5.42544	0.784817
7	43	820	587	0	2.1	6.913	6	3	3.81	1.905	4.25971	0.616188
7	44	820	587	0	2.13333	5.643	6	2	3.81	1.27	4.01609	0.711695
7	45	822	587	1.27	2.16667	6.278	8	2	5.08	1.27	5.23634	0.834078
7	46	822	587	0	2.2	6.278	8	3	5.08	1.905	5.42544	0.864199
7	47	822	588	0.635	2.23333	6.278	8	4	5.08	2.54	5.67961	0.904685
7	48	822	589	0.635	2.26667	6.913	6	4	3.81	2.54	4.57905	0.662382
7	49	823	589	0.635	2.3	6.128	7	4	4.445	2.54	5.11953	0.835433
7	50	824	591	1.42	2.33333	7.548	7	6	4.445	3.81	5.85441	0.775624
7	51	825	592	0.898	2.36667	7.811	7	6	4.445	3.81	5.85441	0.749508
7	52	826	592	0.635	2.4	7.548	8	6	5.08	3.81	6.35	0.841282
7	53	828	593	1.42	2.43333	8.968	10	7	6.35	4.445	7.75116	0.864313
7	54	828	594	0.635	2.46667	9.603	10	8	6.35	5.08	8.13197	0.846815
7	55	828	595	0.635	2.5	10.238	10	9	6.35	5.715	8.54305	0.834445
7	56	828	595	0	2.53333	10.238	10	9	6.35	5.715	8.54305	0.834445
7	57	829	595	0.635	2.56667	10.873	9	8	5.715	5.08	7.64641	0.703248
7	58	831	597	1.796	2.6	11.249	11	10	6.985	6.35	9.43995	0.839182
7	59	835	600	3.175	2.63333	14.424	15	13	9.525	8.255	12.6044	0.873848
7	60	835	601	0.635	2.66667	15.059	13	14	8.255	8.89	12.1317	0.805608
7	61	838	604	2.694	2.7	16.483	16	17	10.16	10.795	14.8242	0.899364
7	62	838	604	0	2.73333	16.483	16	16	10.16	10.16	14.3684	0.871711
7	63	839	605	0.898	2.76667	16.746	17	16	10.795	10.16	14.8242	0.88524
7	64	838	605	0.635	2.8	16.746	15	16	9.525	10.16	13.9266	0.83164
7	65	837	603	1.42	2.83333	17.531	13	12	8.255	7.62	11.2343	0.640825
7	66	837	602	0.635	2.86667	16.746	12	10	7.62	6.35	9.91902	0.592322
7	67	837	599	1.905	2.9	17.753	11	7	6.985	4.445	8.27939	0.466366
7	68	839	600	1.42	2.93333	18.538	11	7	6.985	4.445	8.27939	0.446617
7	69	840	603	2.008	2.96667	19.126	12	9	7.62	5.715	9.525	0.498013
7	70	840	606	1.905	3	20.396	12	11	7.62	6.985	10.3371	0.506818
7	71	840	607	0.635	3.03333	20.396	12	12	7.62	7.62	10.7763	0.528354
7	72	842	614	4.623	3.06667	25.019	13	19	8.255	12.065	14.6188	0.584308
7	73	841	624	6.382	3.1	30.766	10	27	6.35	17.145	18.2831	0.594265
7	74	842	626	1.42	3.13333	30.39	7	26	4.445	16.51	17.0979	0.562616
7	75	842	626	0	3.16667	27.215	7	25	4.445	15.875	16.4856	0.605753
7	76	842	626	0	3.2	26.58	4	22	2.54	13.97	14.199	0.5342
7	77	841	625	0.898	3.23333	24.784	3	21	1.905	13.335	13.4704	0.543511
7	78	840	624	0.898	3.26667	25.682	1	19	0.635	12.065	12.0817	0.470435
7	79	843	623	2.008	3.3	26.792	5	18	3.175	11.43	11.8628	0.442773
7	80	846	623	1.905	3.33333	28.062	9	20	5.715	12.7	13.9266	0.496281
7	81	847	623	0.635	3.36667	27.277	10	21	6.35	13.335	14.7697	0.541472
7	82	848	625	1.42	3.4	28.062	11	26	6.985	16.51	17.9268	0.638828
7	83	850	629	2.84	3.43333	28.997	11	29	6.985	18.415	19.6952	0.679216
7	84	855	635	4.96	3.46667	32.537	15	32	9.525	20.32	22.4417	0.689727
7	85	856	638	2.008	3.5	32.537	16	32	10.16	20.32	22.7185	0.698234
7	86	857	638	0.635	3.53333	31.267	17	31	10.795	19.685	22.4506	0.71803
7	87	862	637	3.238	3.56667	33.87	20	23	12.7	14.605	19.3545	0.571434
7	88	862	637	0	3.6	29.247	21	13	13.335	8.255	15.6833	0.536238
7	89	864	636	1.42	3.63333	24.285	22	10	13.97	6.35	15.3455	0.631891
7	90	864	636	0	3.66667	22.865	22	10	13.97	6.35	15.3455	0.671134
7	91	864	635	0.635	3.7	23.5	22	9	13.97	5.715	15.0938	0.642288
7	92	864	634	0.635	3.73333	24.135	23	9	14.605	5.715	15.6833	0.649817
7	93	864	632	1.27	3.76667	24.507	24	8	15.24	5.08	16.0644	0.655501
7	94	864	630	1.27	3.8	24.879	21	7	13.335	4.445	14.0563	0.564988
7	95	864	630	0	3.83333	22.871	18	7	11.43	4.445	12.2639	0.53622
7	96	864	630	0	3.86667	20.966	17	7	10.795	4.445	11.6743	0.556822
7	97	863	629	0.898	3.9	21.229	15	4	9.525	2.54	9.85785	0.464358
7	98	861	628	1.42	3.93333	21.229	11	-1	6.985	-0.635	7.0138	0.330388
7	99	861	627	0.635	3.96667	19.024	6	-8	3.81	-5.08	6.35	0.333789
7	100	861	627	0	4	14.064	5	-11	3.175	-6.985	7.67273	0.545558
7	101	861	627	0	4.03333	12.056	4	-11	2.54	-6.985	7.43248	0.616497
7	102	861	627	0	4.06667	11.421	-1	-10	-0.635	-6.35	6.38167	0.558766
7	103	860	627	0.635	4.1	8.818	-2	-10	-1.27	-6.35	6.47575	0.734379
7	104	860	626	0.635	4.13333	9.453	-4	-10	-2.54	-6.35	6.83916	0.723491
7	105	860	627	0.635	4.16667	8.668	-4	-9	-2.54	-5.715	6.25402	0.721507
7	106	862	627	1.27	4.2	9.938	-2	-8	-1.27	-5.08	5.23634	0.526901
7	107	866	622	4.066	4.23333	13.369	2	-12	1.27	-7.62	7.72511	0.577837
7	108	867	618	2.618	4.26667	15.352	3	-14	1.905	-8.89	9.09182	0.592224
7	109	875	586	20.945	4.3	35.027	11	-44	6.985	-27.94	28.7999	0.82222
7	110	875	582	2.54	4.33333	36.297	11	-48	6.985	-30.48	31.2701	0.861507
7	111	873	576	4.016	4.36667	40.313	9	-54	5.715	-34.29	34.763	0.862327
7	112	870	570	4.26	4.4	44.573	7	-59	4.445	-37.465	37.7278	0.846426
7	113	863	562	6.75	4.43333	50.425	2	-66	1.27	-41.91	41.9292	0.831517
7	114	860	559	2.694	4.46667	51.699	-1	-68	-0.635	-43.18	43.1847	0.83531
7	115	859	558	0.898	4.5	51.962	-2	-69	-1.27	-43.815	43.8334	0.843566
7	116	856	555	2.694	4.53333	54.656	-5	-72	-3.175	-45.72	45.8301	0.838519
7	117	856	554	0.635	4.56667	55.291	-5	-73	-3.175	-46.355	46.4636	0.840347
7	118	856	551	1.905	4.6	57.196	-4	-76	-2.54	-48.26	48.3268	0.844933
7	119	856	551	0	4.63333	56.561	-4	-75	-2.54	-47.625	47.6927	0.843208
7	120	862	552	3.863	4.66667	59.789	2	-75	1.27	-47.625	47.6419	0.796834
7	121	862	552	0	4.7	59.154	0	-75	0	-47.625	47.625	0.805102
7	122	862	552	0	4.73333	57.884	-4	-70	-2.54	-44.45	44.5225	0.769168
7	123	862	551	0.635	4.76667	54.453	-5	-67	-3.175	-42.545	42.6633	0.783489
7	124	861	551	0.635	4.8	52.47	-14	-35	-8.89	-22.225	23.9371	0.456205
7	125	862	552	0.898	4.83333	32.423	-13	-30	-8.255	-19.05	20.7617	0.640338
7	126	862	552	0	4.86667	29.883	-11	-24	-6.985	-15.24	16.7645	0.561004
7	127	859	551	2.008	4.9	27.875	-11	-19	-6.985	-12.065	13.9411	0.500129
7	128	856	550	2.008	4.93333	25.623	-7	-12	-4.445	-7.62	8.8217	0.344288
7	129	854	549	1.42	4.96667	20.293	-6	-10	-3.81	-6.35	7.40531	0.364919
7	130	853	549	0.635	5	18.234	-6	-9	-3.81	-5.715	6.86858	0.376691
7	131	853	549	0	5.03333	17.336	-3	-6	-1.905	-3.81	4.25971	0.245715
7	132	851	552	2.29	5.06667	16.932	-5	-2	-3.175	-1.27	3.41958	0.20196
7	133	849	551	1.42	5.1	17.717	-7	0	-4.445	0	4.445	0.250889
7	134	848	552	0.898	5.13333	16.71	-8	1	-5.08	0.635	5.11953	0.306375
7	135	846	555	2.29	5.16667	19	-16	3	-10.16	1.905	10.3371	0.544055
7	136	844	559	2.84	5.2	17.977	-18	7	-11.43	4.445	12.2639	0.682199
7	137	843	560	0.898	5.23333	18.875	-19	8	-12.065	5.08	13.0909	0.693556
7	138	843	560	0	5.26667	18.875	-19	9	-12.065	5.715	13.3501	0.707291
7	139	843	561	0.635	5.3	18.875	-18	10	-11.43	6.35	13.0755	0.692739
7	140	843	561	0	5.33333	18.24	-19	9	-12.065	5.715	13.3501	0.731914
7	141	842	561	0.635	5.36667	17.977	-20	9	-12.7	5.715	13.9266	0.774692
7	142	842	561	0	5.4	17.977	-17	10	-10.795	6.35	12.5242	0.696677
7	143	842	561	0	5.43333	15.969	-14	11	-8.89	6.985	11.3059	0.707988
7	144	841	563	1.42	5.46667	15.381	-13	14	-8.255	8.89	12.1317	0.788743
7	145	841	566	1.905	5.5	15.866	-12	17	-7.62	10.795	13.2135	0.832818
7	146	841	568	1.27	5.53333	16.501	-12	19	-7.62	12.065	14.2699	0.864787
7	147	842	570	1.42	5.56667	17.921	-9	18	-5.715	11.43	12.7791	0.713081
7	148	842	571	0.635	5.6	16.266	-7	20	-4.445	12.7	13.4554	0.827211
7	149	843	573	1.42	5.63333	16.266	-5	21	-3.175	13.335	13.7078	0.842725
7	150	843	574	0.635	5.66667	16.003	-3	19	-1.905	12.065	12.2145	0.763261
7	151	843	574	0	5.7	13.713	-1	15	-0.635	9.525	9.54614	0.696138
7	152	843	574	0	5.73333	10.873	0	14	0	8.89	8.89	0.817622
7	153	843	574	0	5.76667	9.975	0	14	0	8.89	8.89	0.891228
7	154	843	573	0.635	5.8	10.61	0	12	0	7.62	7.62	0.71819
7	155	843	573	0	5.83333	9.975	0	12	0	7.62	7.62	0.76391
7	156	843	573	0	5.86667	9.975	1	12	0.635	7.62	7.64641	0.766558
7	157	843	573	0	5.9	9.34	1	12	0.635	7.62	7.64641	0.818674
7	158	846	572	2.008	5.93333	11.348	4	11	2.54	6.985	7.43248	0.65496
7	159	846	572	0	5.96667	11.348	5	9	3.175	5.715	6.53773	0.576113
7	160	846	572	0	6	9.928	5	6	3.175	3.81	4.95951	0.499548
7	161	846	572	0	6.03333	8.023	5	4	3.175	2.54	4.06598	0.506791
7	162	846	572	0	6.06667	6.753	4	2	2.54	1.27	2.83981	0.420525
7	163	846	571	0.635	6.1	5.968	4	0	2.54	0	2.54	0.425603
7	164	846	571	0	6.13333	5.333	3	-2	1.905	-1.27	2.28953	0.429313
7	165	846	571	0	6.16667	3.913	3	-3	1.905	-1.905	2.69408	0.688494
7	166	846	571	0	6.2	3.278	3	-3	1.905	-1.905	2.69408	0.821866
7	167	846	571	0	6.23333	3.278	3	-3	1.905	-1.905	2.69408	0.821866
7	168	846	571	0	6.26667	3.278	3	-3	1.905	-1.905	2.69408	0.821866
7	169	846	571	0	6.3	3.278	3	-2	1.905	-1.27	2.28953	0.698452
7	170	846	571	0	6.33333	2.643	3	-2	1.905	-1.27	2.28953	0.86626
7	171	848	570	1.42	6.36667	4.063	5	-3	3.175	-1.905	3.70265	0.91131
7	172	848	572	1.27	6.4	5.333	5	-1	3.175	-0.635	3.23788	0.60714
7	173	848	572	0	6.43333	5.333	2	0	1.27	0	1.27	0.23814
7	174	848	572	0	6.46667	3.325	2	0	1.27	0	1.27	0.381955
7	175	848	573	0.635	6.5	3.96	2	1	1.27	0.635	1.4199	0.358561
7	176	847	573	0.635	6.53333	4.595	1	1	0.635	0.635	0.898026	0.195435
7	177	847	573	0	6.56667	4.595	1	1	0.635	0.635	0.898026	0.195435
7	178	848	575	1.42	6.6	6.015	2	4	1.27	2.54	2.83981	0.472121
7	179	848	575	0	6.63333	5.38	2	4	1.27	2.54	2.83981	0.527845
7	180	849	576	0.898	6.66667	6.278	3	5	1.905	3.175	3.70265	0.589782
7	181	852	577	2.008	6.7	8.286	6	6	3.81	3.81	5.38815	0.650272
7	182	852	577	0	6.73333	8.286	6	6	3.81	3.81	5.38815	0.650272
7	183	852	577	0	6.76667	8.286	6	6	3.81	3.81	5.38815	0.650272
7	184	852	577	0	6.8	8.286	6	6	3.81	3.81	5.38815	0.650272
7	185	866	577	8.89	6.83333	17.176	20	6	12.7	3.81	13.2592	0.77196
7	186	867	576	0.898	6.86667	18.074	19	6	12.065	3.81	12.6523	0.700027
7	187	869	577	1.42	6.9	18.074	21	5	13.335	3.175	13.7078	0.758425
7	188	869	577	0	6.93333	16.804	21	5	13.335	3.175	13.7078	0.815744
7	189	869	577	0	6.96667	16.804	21	5	13.335	3.175	13.7078	0.815744
7	190	867	577	1.27	7	18.074	19	4	12.065	2.54	12.3295	0.682166
7	191	866	579	1.42	7.03333	18.859	19	6	12.065	3.81	12.6523	0.670888
7	192	865	579	0.635	7.06667	18.859	18	6	11.43	3.81	12.0483	0.638861
7	193	864	579	0.635	7.1	19.494	16	4	10.16	2.54	10.4727	0.537226
7	194	863	579	0.635	7.13333	18.709	15	4	9.525	2.54	9.85785	0.526904
7	195	863	579	0	7.16667	18.709	14	3	8.89	1.905	9.09182	0.48596
7	196	862	579	0.635	7.2	18.446	10	2	6.35	1.27	6.47575	0.351066
7	197	862	579	0	7.23333	16.438	10	2	6.35	1.27	6.47575	0.39395
7	198	861	580	0.898	7.26667	17.336	9	3	5.715	1.905	6.02414	0.347493
7	199	859	582	1.796	7.3	19.132	7	5	4.445	3.175	5.46248	0.285515
7	200	857	582	1.27	7.33333	20.402	-9	5	-5.715	3.175	6.53773	0.320445
[truncated: 34,120 more rows]
