# Supplementary material for: Cell and molecular transitions during efficient dedifferentiation
Source: eLife journal article supplement (doi:10.7554/elife.55435), 2020-04-07
Supplement: supp [file elife-55435-supp-v1.zip › elife_poa_e55435_Figure_6_source_data_1.xlsx]

## Sheet: Fig 6A cryS and division
Fig 6A cryS and division
Mean cryS intensity (AU)
Divides	No division
1.353	1.138
1.045	-0.513
1.703	0.866
1.123	2.81
1.973	1.132
7.071	1.384
0.315	0.763
2.754	0.915
1.585	1.487
2.078	4.018
1.205	4.484
1.886	0.402
0.511	1.513
1.201	-0.196
2.658	0.717
0.629	-0.083
-0.094	3.475
3.77	0.565
-0.042	3.002
1.605	1.962
2.594	3.335
4.266	1.074
-2.842	3.964
1.031	0.962
1.81	2.645
1.609	0.112
2.92	1.9
1.42	4.094
2.422	1.355
2.6	3.368
0.165	1.688
0.969	2.473
3.96	1.882
1.65	6.645
13.596	2.511
2.033	-0.1
2.475	1.112
2.616	0.275
0.192	1.525
4.025	0.723
4	0.712
-1.391	-0.116
2.634	4.826
1.438	1.288
1.694	3.783
2.542	-0.051
1.176	1.067
1.549	0.408
0.915	1.699
-1.504	6.223
1.433	2.743
2.886	-0.819
1.77	0.58
5.121	1.998
0.911	0.627
1.951	1.777
-1.931	1.768
-0.734	2.661
1.181	1.96
0.368	1.058
0.234	2.797
1.583	6.174
1.433	2.743
0.645	2.431
0.46	1.685
0.386	5.154
0.906	-0.527
1.279	1.263
0.98	-0.556
0.857	5.873
0.478	0.864
1.808	1.853
1.603	2.438
5.118	3.596
0.808	0.969
1.25	1.051
1.114	1.777
0.917	0.592
0.453	0.737
0.627	0.732
-0.375	1.17
1.304	3.944
-0.078	0.205
0.795	5.891
1.73	1.388
1.355	4.118
5.975	1.645
0.281	1.864
4.616	1.824
0.924	3.406
2.134	1.982
2.21	4.56
2.167	1.549
2.312	1.739
1.375	0.558
0.719	1.625
1.17	1.536
1.799	7.031
1.623	0.663
2.58	3.138
0.991	-0.049
0.181	1.353
0.44	0.728
0.498	2.844
2.174	0.812
2.042	1.538
0.647	5.484
0.328	1.685
-0.018	1.321
2.085	-1.248
0.705	-0.6
1.192	2.886
1.147	1.194
1.228	3.933
4.752	1.475
0.641	1.391
0.884	1.324
-0.846	0.924
0.33	0.837
0.333	5.411
1.44	1.353
0.033	5.002
1.5	1.145
1.078	0.897
	0.667
	9.002
	2.056
	3.978
	2.422
	1.522
	-0.141
	1.583
	0.045
	0.462
	2.353
	2.033
	0.719

## Sheet: Fig 6B div time vs cryS
Fig 6B Division time vs mean cryS intensity
mean cryS intensity (AU)	division time (h)
1.353	27.9
1.045	27.7333
1.703	27.7
1.123	27.3
1.973	27.1333
7.071	26.5
0.315	26.4667
2.754	26.0667
1.585	25.9333
2.078	25.9
1.205	25.7
1.886	25.6333
0.511	25.4667
1.201	25.4
2.658	25.3333
0.629	25.2667
-0.094	25.2333
3.77	25.1
-0.042	25.1
1.605	25.0667
2.594	24.8333
4.266	24.8
-2.842	24.6
1.031	24.6
1.81	24.4333
1.609	24.3667
2.92	24.2667
1.42	23.9
2.422	23.6333
2.6	23.5333
0.165	23.0333
0.969	22.9
3.96	22.8333
1.65	22.7667
13.596	22.1667
2.033	21.9333
2.475	21.8
2.616	21.7
0.192	21.4333
4.025	21.2
4	20.9
-1.391	20.7667
2.634	20.5667
1.438	20.4
1.694	20.2
2.542	20
1.176	19.9667
1.549	19.8333
0.915	19.8
-1.504	19.7667
1.433	19.7
2.886	19.5333
1.77	19.4333
5.121	19.4
0.911	19.2333
1.951	19.1
-1.931	18.9667
-0.734	18.7667
1.181	18.6667
0.368	18.4
0.234	18.4
1.583	18.1333
1.433	17.6667
0.645	17.5333
0.46	17.4667
0.386	16.9667
0.906	16.6333
1.279	16.5333
0.98	16.3
0.857	15.9333
0.478	15.7333
1.808	15.7333
1.603	15.5667
5.118	15.4
0.808	15.2667
1.25	15.2667
1.114	15.1667
0.917	14.5333
0.453	14.5333
0.627	14.3333
-0.375	14
1.304	14
-0.078	13.4
0.795	13.3667
1.73	13.2333
1.355	13.0667
5.975	13
0.281	12.7333
4.616	12.5
0.924	12.4667
2.134	12.1333
2.21	12.0667
2.167	12
2.312	11.6667
1.375	11.5333
0.719	11.0333
1.17	10.8667
1.799	10.8
1.623	10.8
2.58	10.7667
0.991	10.6667
0.181	10.2
0.44	9.96667
0.498	9.83333
2.174	9.53333
2.042	9.5
0.647	9.36667
0.328	8.66667
-0.018	8.13333
2.085	7.8
0.705	7.5
1.192	7.5
1.147	7.43333
1.228	7.4
4.752	7.06667
0.641	6.9
0.884	6.8
-0.846	6.53333
0.33	6.26667
0.333	6.1
1.44	5.96667
0.033	5.46667
1.5	5.4
1.078	4.7

## Sheet: Fig 6C mean speed vs cryS
Fig 6C mean cell speed vs initial cryS intensity
Initial CryS intensity (AU)	Mean speed (µm/s)
15.5976	0.013456
9.16466	0.017808
12.6821	0.016655
9.84611	0.022319
10.8326	0.025619
10.3995	0.012003
9.70795	0.02679
13.1298	0.015196
10.4819	0.017279
13.2111	0.016791
13.1855	0.05836
12.2896	0.026094
13.2673	0.033331
8.31823	0.031963
-2.22827	0.044368
-3.9245	0.059399
-0.30715	0.014351
-3.74988	0.040445
-1.75261	0.003883
8.41687	0.01323
2.13494	0.006245
-2.55888	0.017015
-6.57974	0.056072
8.39615	0.019165
13.0477	0.035374
7.6845	0.014125
8.03614	0.030066
14.4882	0.013363
9.36048	0.061508
6.65398	0.040049
6.42297	0.017711
10.1958	0.048355
10.119	0.01315
25.3966	0.04026
11.5282	0.025803
6.62056	0.037959
23.3562	0.015738
6.12803	0.020741
7.49847	0.015099
8.18233	0.059144
9.89655	0.031863
9.53092	0.010208
9.91678	0.013614
9.74024	0.011053
8.45397	0.046931
10.1285	0.030645
7.96948	0.026663
14.4326	0.028082
11.5985	0.009072
15.3539	0.018968
7.09526	0.019189
11.0614	0.023351
7.11052	0.015044
0.560638	0.226584
4.04434	0.011167
1.51229	0.011788
37.9401	0.011238
0.1245	0.088443
-1.44691	0.015142
2.13976	0.006221
0.713089	0.010452
-9.26705	0.03157
-1.54088	0.046284
-0.93189	0.039172
-4.94683	0.181446
-2.82795	0.067739
-4.76562	0.026024
-2.96241	0.019438
-3.95261	0.010205
0.516306	0.05335
-2.9812	0.028127
-1.18434	0.025752
-2.65815	0.041999
-4.37687	0.019186
1.87631	0.013169
-3.61607	0.05577
-3.68562	0.034151
-3.28096	0.034592
-2.77157	0.022191
-4.32249	0.046186
-4.34289	0.014392
-3.14056	0.022697
1.46715	0.062021
-2.4037	0.012178
-1.65655	0.010065
2.34892	0.014106
-1.20257	0.025248
1.54522	0.02128
-2.83871	0.069972
-3.22281	0.015805
-0.82988	0.019677
1.19406	0.017966
-3.42875	0.023672
1.91197	0.047566
-0.08996	0.008626
14.7688	0.008672
2.36161	0.036281
0.941525	0.005105
0.00145	0.013635
2.25783	0.003795
-1.74538	0.030842
1.48	0.014235
0.503131	0.005044
-2.86538	0.038095
2.44819	0.019388
2.45574	0.018847
-1.20787	0.021684
-0.75164	0.056557
1.00337	0.028474
-2.85317	0.03388
-3.11357	0.011099
2.27759	0.02679
-2.62827	0.02128
6.14377	0.032311
6.65751	0.026713
-1.47502	0.025698
-0.52144	0.018671
-2.01028	0.024413
-0.89703	0.00857
-1.87101	0.025487
-1.90795	0.025289
-1.12401	0.002398
3.15663	0.014944
0.940241	0.022351
-1.49012	0.018531
-0.99566	0.039082
-0.56948	0.035521
3.50731	0.023333
0.29462	0.010153
-0.30121	0.026064
6.47502	0.009323
6.32611	0.036331
-1.96257	0.048308
3.90265	0.022373
2.45944	0.012851
3.28851	0.010052
3.39358	0.003776
0.51727	0.013673
1.49414	0.005426
0.238074	0.033016
-2.00691	0.028808
-1.88145	0.042278
-0.72964	0.032969
0.71759	0.004249
-1.98747	0.022838
1.45398	0.044709
-3.24868	0.028199
-2.72418	0.031749
7.66554	0.006063
-0.43052	0.00344
-2.02361	0.015061
-1.07357	0.029835
-1.93534	0.003991
-1.40755	0.022048
-1.97574	0.061382
0.600159	0.011635
-1.80723	0.022774
3.22089	0.028047
3.59418	0.022009
12.6872	0.047888
0.920001	0.007705
-1.80402	0.009933
-2.41574	0.019927
1.91743	0.01702
0.970599	0.06364
2.8506	0.021713
3.8898	0.023478
2.65446	0.010934
-2.12819	0.01847
-2.63727	0.030879
0.414941	0.04018
1.33911	0.019925
-1.96729	0.011846
-2.2853	0.019145
4.24755	0.034963
-1.85478	0.025552
0.50506	0.044124
-0.67663	0.055491
8.40787	0.02305
8.3947	0.042923
7.12273	0.024244
-1.87743	0.060327
0.915341	0.043461
2.03068	0.05089
-0.17526	0.021808
0.607712	0.019159
0.589236	0.017707
-0.36048	0.033441
-0.73719	0.022821
13.8916	0.137275
-1.41205	0.05144
1.17559	0.027797
59.8418	0.079667
62.5947	0.040995
-2.8249	0.034954
7.10137	0.088281
-1.60755	0.030789
-0.41333	0.005253
-1.36755	0.004
2.94699	0.045629
-1.60659	0.019068
-2.75132	0.019747
0.291565	0.047854
2.19261	0.026397
-2.10731	0.022629
1.92273	0.013085
-1.30362	0.012839
-3.00514	0.155646
-2.14812	0.036793
-0.93318	0.066773
-3.0906	0.043994
-0.19663	0.017498
-3.98233	0.017637
-2.39052	0.027525
-1.70779	0.006038
-0.15903	0.020695
6.13542	0.003309
1.75253	0.055242
2.91808	0.017644
2.71951	0.031376
2.94265	0.023289
7.86129	0.005328
3.18924	0.021561
2.94361	0.014775
6.20772	0.007699
1.32642	0.047392
9.03486	0.028167
11.7725	0.005477
3.36932	0.012239
3.6755	0.032791
3.24836	0.023496
8.7653	0.009439
3.45527	0.03824
6.19823	0.013285
6.6959	0.031056
8.5894	0.03919
7.57044	0.010866
7.53406	0.043243
4.35984	0.034997
4.3963	0.015861
5.11213	0.041231
6.23502	0.014632
4.30056	0.0312
6.92176	0.013941
8.37269	0.059153
-2.95779	0.065357
-1.07494	0.061003
2.92338	0.040936
2.43382	0.023074
1.64755	0.045095
2.75421	0.045829
2.68386	0.00424
4.41655	0.010711
1.60835	0.02923
3.66763	0.044861
2.6294	0.063529
2.5155	0.036253
3.05012	0.034522
4.53494	0.022519
2.72787	0.029819
6.67663	0.027966
2.48353	0.066214
2.93446	0.022158
2.88192	0.02799
5.25671	0.013944
3.69446	0.067463
2.02442	0.030813
2.92931	0.021783
1.95245	0.038835
1.5155	0.01868
9.4351	0.031296
2.27695	0.011734
7.81773	0.045339
-8.82426	0.073767
15.9745	0.001069
1.62222	0.00486
-3.3216	0.009512
-3.39839	0.036753
-3.89205	0.018585
-2.29687	0.023005
-3.49057	0.01196
-3.21269	0.012599
-3.50201	0.029433
-1.63389	0.026889
-1.86394	0.014263
-2.27357	0.018104
-2.01092	0.005695
-2.50843	0.022475
67.1504	0.007298
4.66029	0.001675
60.0527	0.101274
1.67438	0.017189
-2.69832	0.048085
-2.02313	0.225543
1.87743	0.034625
-0.35872	0.031391
1.04321	0.01824
0.322894	0.013182
1.81927	0.072608
5.21671	0.001219
0.215582	0.012126
-0.81414	0.065592
-3.79422	0.011463
-4.289	0.031548
-4.05831	0.041401
-3.35518	0.022031
-0.48867	0.042713
-1.15052	0.047944
-5.77695	0.013977
-1.1596	0.054471
3.63213	0.050773
0.252209	0.030306
-2.04948	0.041289
3.76144	0.001949
-1.5804	0.01274
-4.47839	0.036463
-2.12643	0.023209
-3.22763	0.015502
0.693091	0.036945
-0.84514	0.021287
-3.42667	0.012849
-1.61317	0.024873
-1.02314	0.014994
-3.69494	0.017259
1.51707	0.164314
7.39824	0.021997
2.59899	0.037744
1.23374	0.013467
0.959357	0.034926
-0.70603	0.037943
3.2657	0.005523
-0.38281	0.020829
9.77687	0.001998
0.119678	0.020261
0.270041	0.018415
0.063132	0.017354
1.16722	0.046272
0.734457	0.021203
1.93077	0.029615
1.15663	0.035548
1.95438	0.024755
1.99454	0.044264
2.76803	0.019224
1.75165	0.025351
1.68161	0.016756
4.6045	0.017714
2.43277	0.045619
2.30346	0.009606
4.92112	0.042984
29.2236	0.012491
1.18956	0.005245
4.80587	0.049063
1.13799	0.099494
-0.25815	0.00798
3.92128	0.017735
47.6803	0.017161
-0.89173	0.013983
-2.79759	0.02593
-2.57542	0.023499
-0.60289	0.040988
-3.3155	0.007736
-3.08804	0.027209
-0.24386	0.024671
-3.05349	0.027123
3.2351	0.03109
0.323853	0.011962
-1.64225	0.017897
0.44032	0.017409
1.12836	0.011179
-1.05365	0.025389
-1.27566	0.01943
2.8959	0.016718
0.924979	0.003911
-0.15454	0.025937
1.87036	0.014866
-0.50281	0.012406
-0.69277	0.023818
-5.11832	0.060043
-1.10811	0.028598
-0.02281	0.01731
1.96225	0.013509
-1.4514	0.031053
-2.66787	0.03437
-1.99743	0.032576
1.19052	0.030881
2.14763	0.023252
3.22322	0.142724
1.01365	0.011017
6.22361	0.018486
0.255096	0.025168
-1.36386	0.007373
-1.28338	0.008519
3.90121	0.032844
-0.74619	0.210793
2.34795	0.049513
2.5951	0.052012
-1.45414	0.004387
2.94554	0.038587
1.93823	0.030884
-0.17831	0.0215
-0.63213	0.005647
-1.23647	0.022081
-0.91277	0.044063
2.64787	0.006036
1.93879	0.01987
2.81639	0.041237
1.50908	0.020847
1.97429	0.033394
0.674536	0.018776
-0.28658	0.003544
-0.18474	0.030062
3.42329	0.014947
-0.49734	0.013979
0.836627	0.004465
-1.61671	0.05637
-0.71181	0.015698
15.1714	0.049765
14.6294	0.058989
19.1185	0.058053
6.31719	0.043224
-4.62567	0.043755
6.31679	0.010152
3.65751	0.012852
1.93687	0.024371
7.07181	0.029214
2.45205	0.012744
2.58233	0.004083
1.8943	0.011466
5.75968	0.027942
4.30177	0.042811
-1.77213	0.02225
-2.14699	0.01786
2.20546	0.019006
-2.29815	0.050763
-1.55678	0.055403
0.983932	0.024307
-2.39984	0.018338
0.20466	0.025813
0.404657	0.035571
-2.83084	0.12544
-3.15189	0.039835
0.003854	0.020535
