# Supplementary material for: Cell and molecular transitions during efficient dedifferentiation
Source: eLife journal article supplement (doi:10.7554/elife.55435), 2020-04-07
Supplement: supp [file elife_poa_e55435_Figure_2_figure_supplement_2.pdf › elife_poa_e55435_Figure_2_figure_supplement_2.pdf]

A

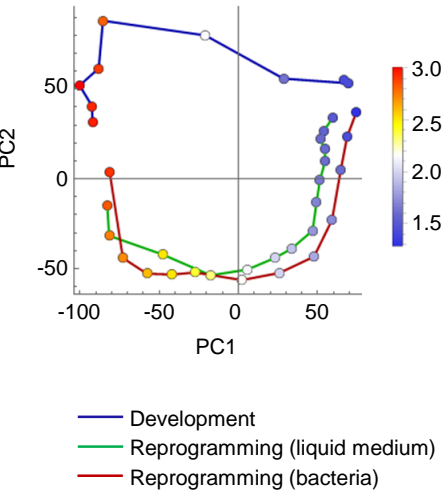

B

| GO biological process complete                          | FC   | p-value              |
|---------------------------------------------------------|------|----------------------|
| regulation of cell-cell adhesion                        | 9.91 | 0.00072              |
| sorocarp stalk cell differentiation                     | 6.11 | 1.5·10 <sup>-5</sup> |
| exogenous drug catabolic process                        | 6.03 | 0.00004              |
| sorocarp spore cell differentiation                     | 5.71 | 0.00076              |
| xenobiotic metabolic process                            | 5.45 | 3.5·10 <sup>-5</sup> |
| cAMP-mediated signaling                                 | 5    | 0.00031              |
| sporulation resulting in formation of a cellular spore  | 4.63 | 3.3·10 <sup>-9</sup> |
| negative regulation of hydrolase activity               | 4.31 | 0.00075              |
| phototaxis                                              | 4.27 | 0.00153              |
| response to antineoplastic agent                        | 4.27 | 0.00153              |
| activation of GTPase activity                           | 4.2  | 6.6·10 <sup>-5</sup> |
| autophagosome organization                              | 4.16 | 0.00091              |
| response to differentiation-inducing factor 1           | 3.78 | 0.00160              |
| protein phosphorylation                                 | 2.45 | 2.3·10 <sup>-8</sup> |
| regulation of protein kinase activity                   | 2.46 | 0.00065              |
| protein dephosphorylation                               | 3.18 | 4.3·10 <sup>-5</sup> |
| sorocarp morphogenesis                                  | 3.12 | 3.4·10 <sup>-5</sup> |
| regulation of small GTPase mediated signal transduction | 2.94 | 0.00016              |
| aggregation involved in sorocarp development            | 2.84 | 7·10 <sup>-6</sup>   |
| cell adhesion                                           | 2.69 | 0.00041              |
| chemotaxis to cAMP                                      | 2.66 | 0.00046              |
| regulation of multi-organism process                    | 2.38 | 0.00161              |
| protein ubiquitination                                  | 2.13 | 0.00076              |
| ubiquitin-dependent protein catabolic process           | 2    | 0.00139              |
