# Supplementary figures and images for: Cell and molecular transitions during efficient dedifferentiation
Source: eLife journal article supplement (doi:10.7554/elife.55435), 2020-04-07

**A**

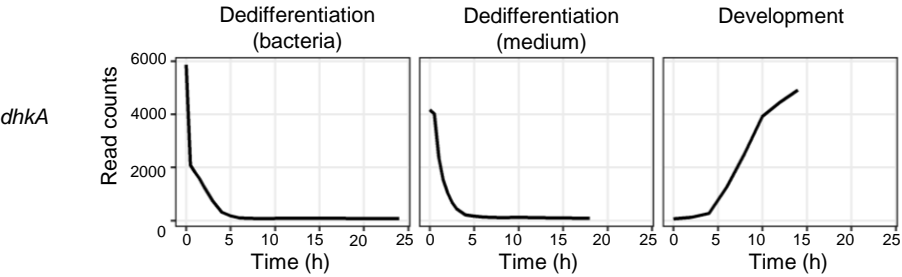

**B**

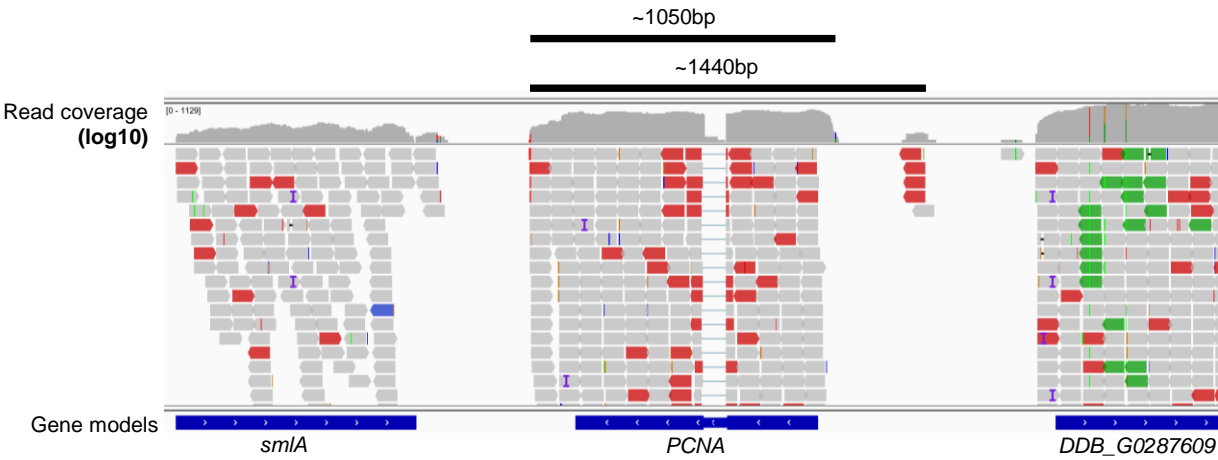

**C**

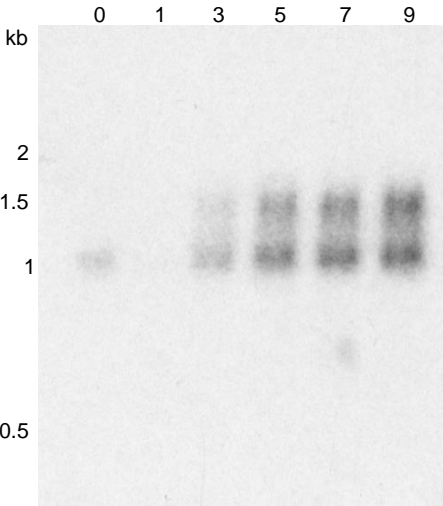

**D**

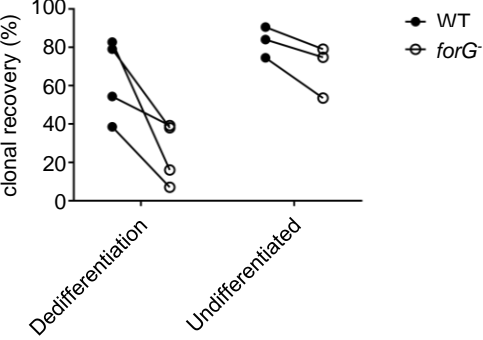

**E**

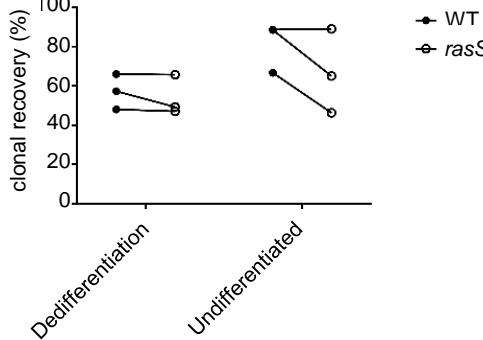

Supplement: supp [file elife-55435-supp-v1.zip › elife_poa_e55435_Figure_3_figure_supplement_1.pdf]

**A**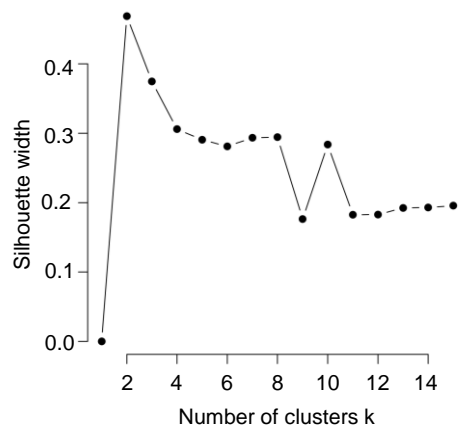**B**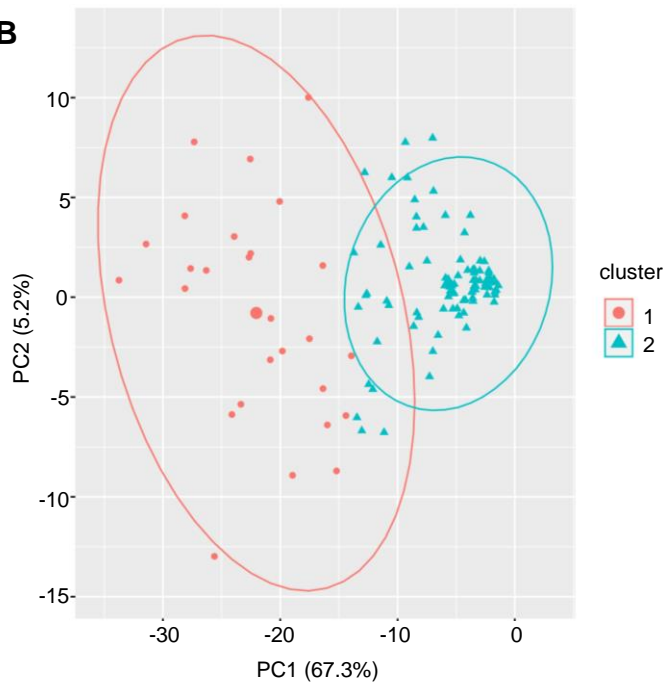**C**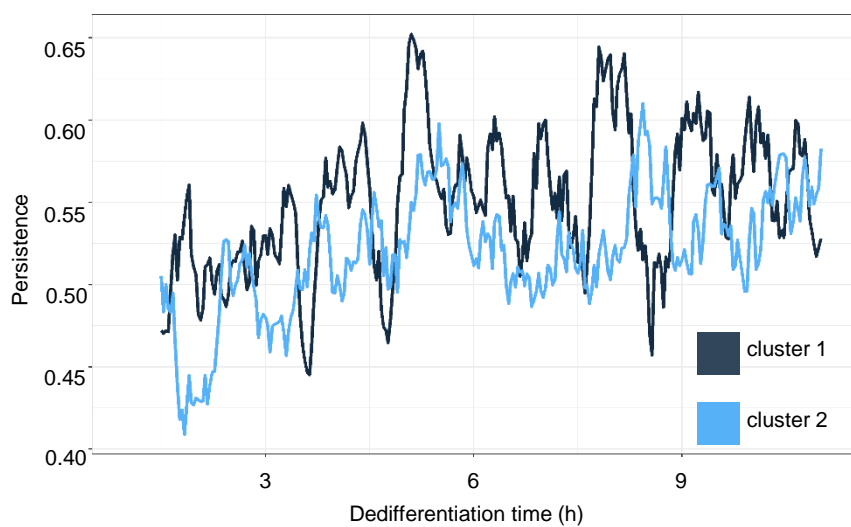

Supplement: supp [file elife-55435-supp-v1.zip › elife_poa_e55435_Figure_5_figure_supplement_1.pdf]

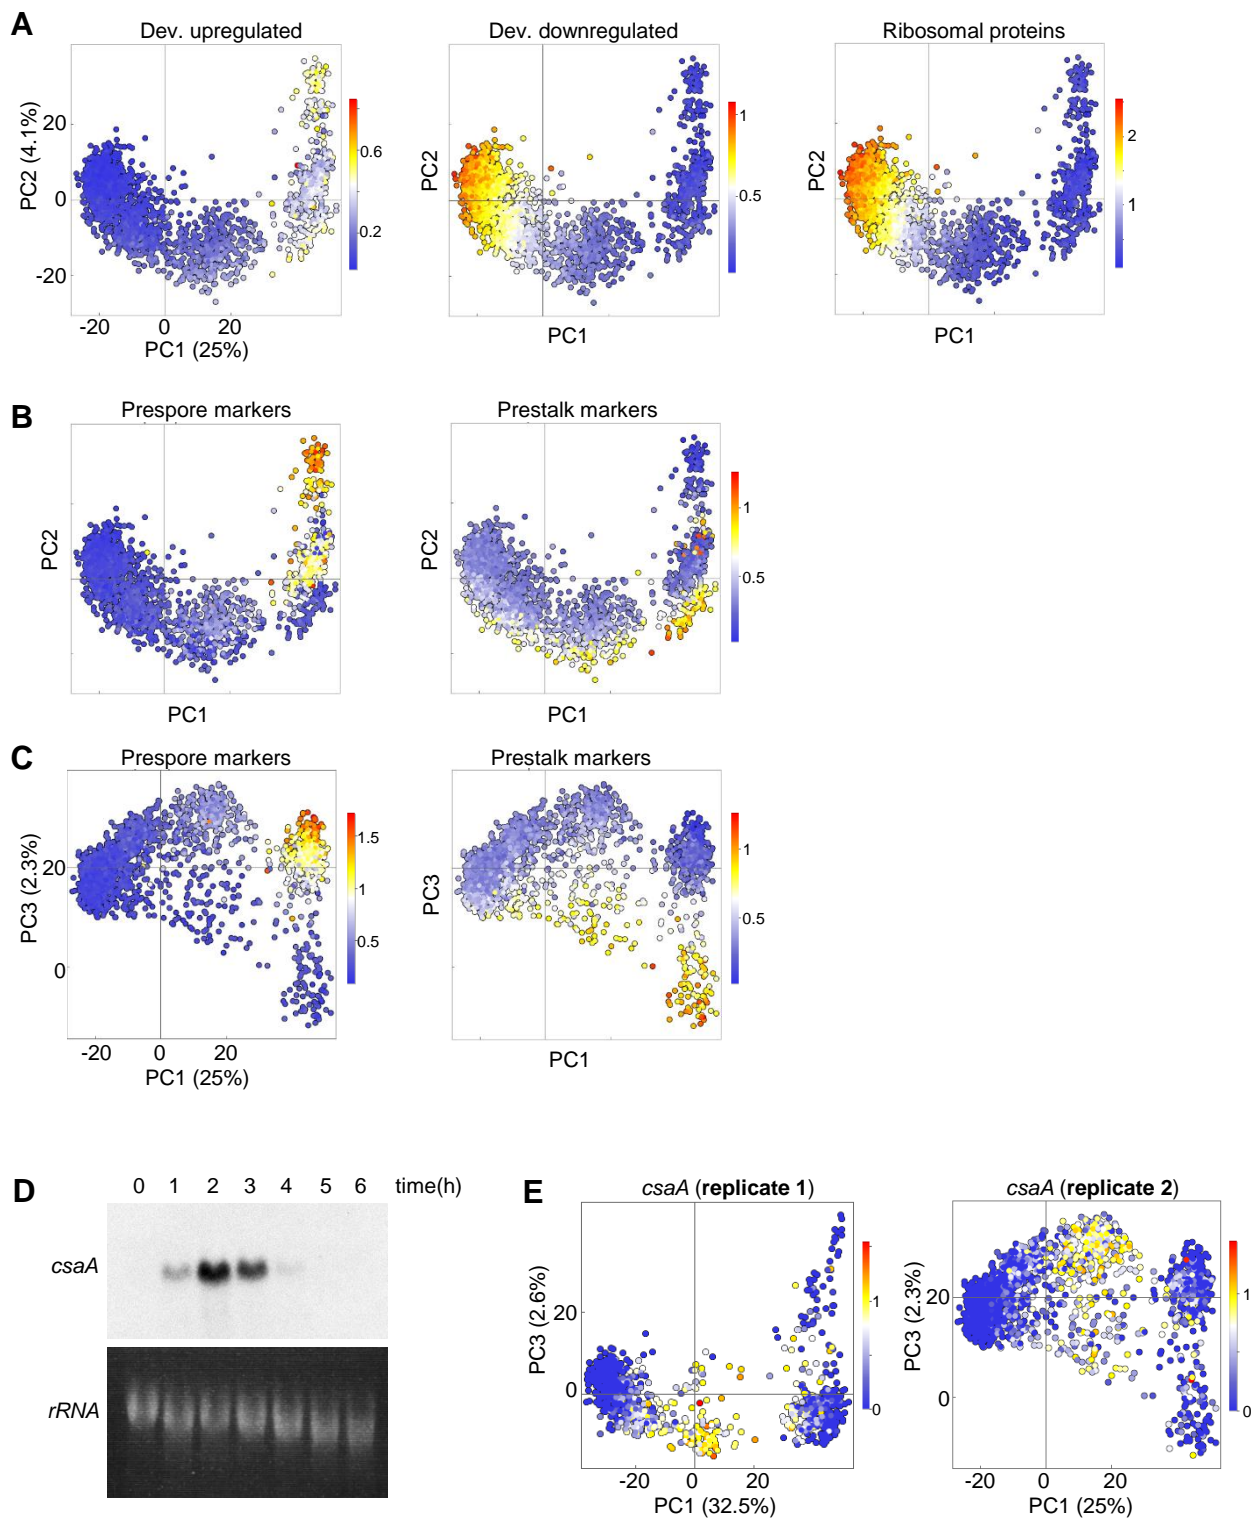

Supplement: supp [file elife-55435-supp-v1.zip › elife_poa_e55435_Figure_6_figure_supplement_1.pdf]

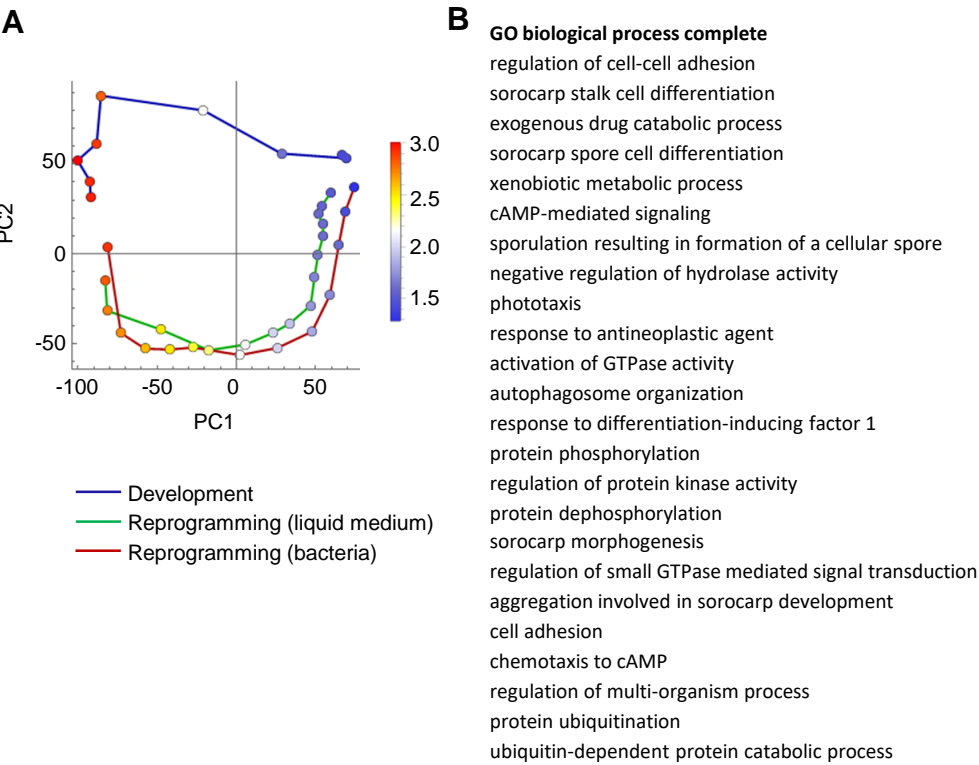

Supplement: supp [file elife-55435-supp-v1.zip › elife_poa_e55435_Figure_2_figure_supplement_2.pdf]

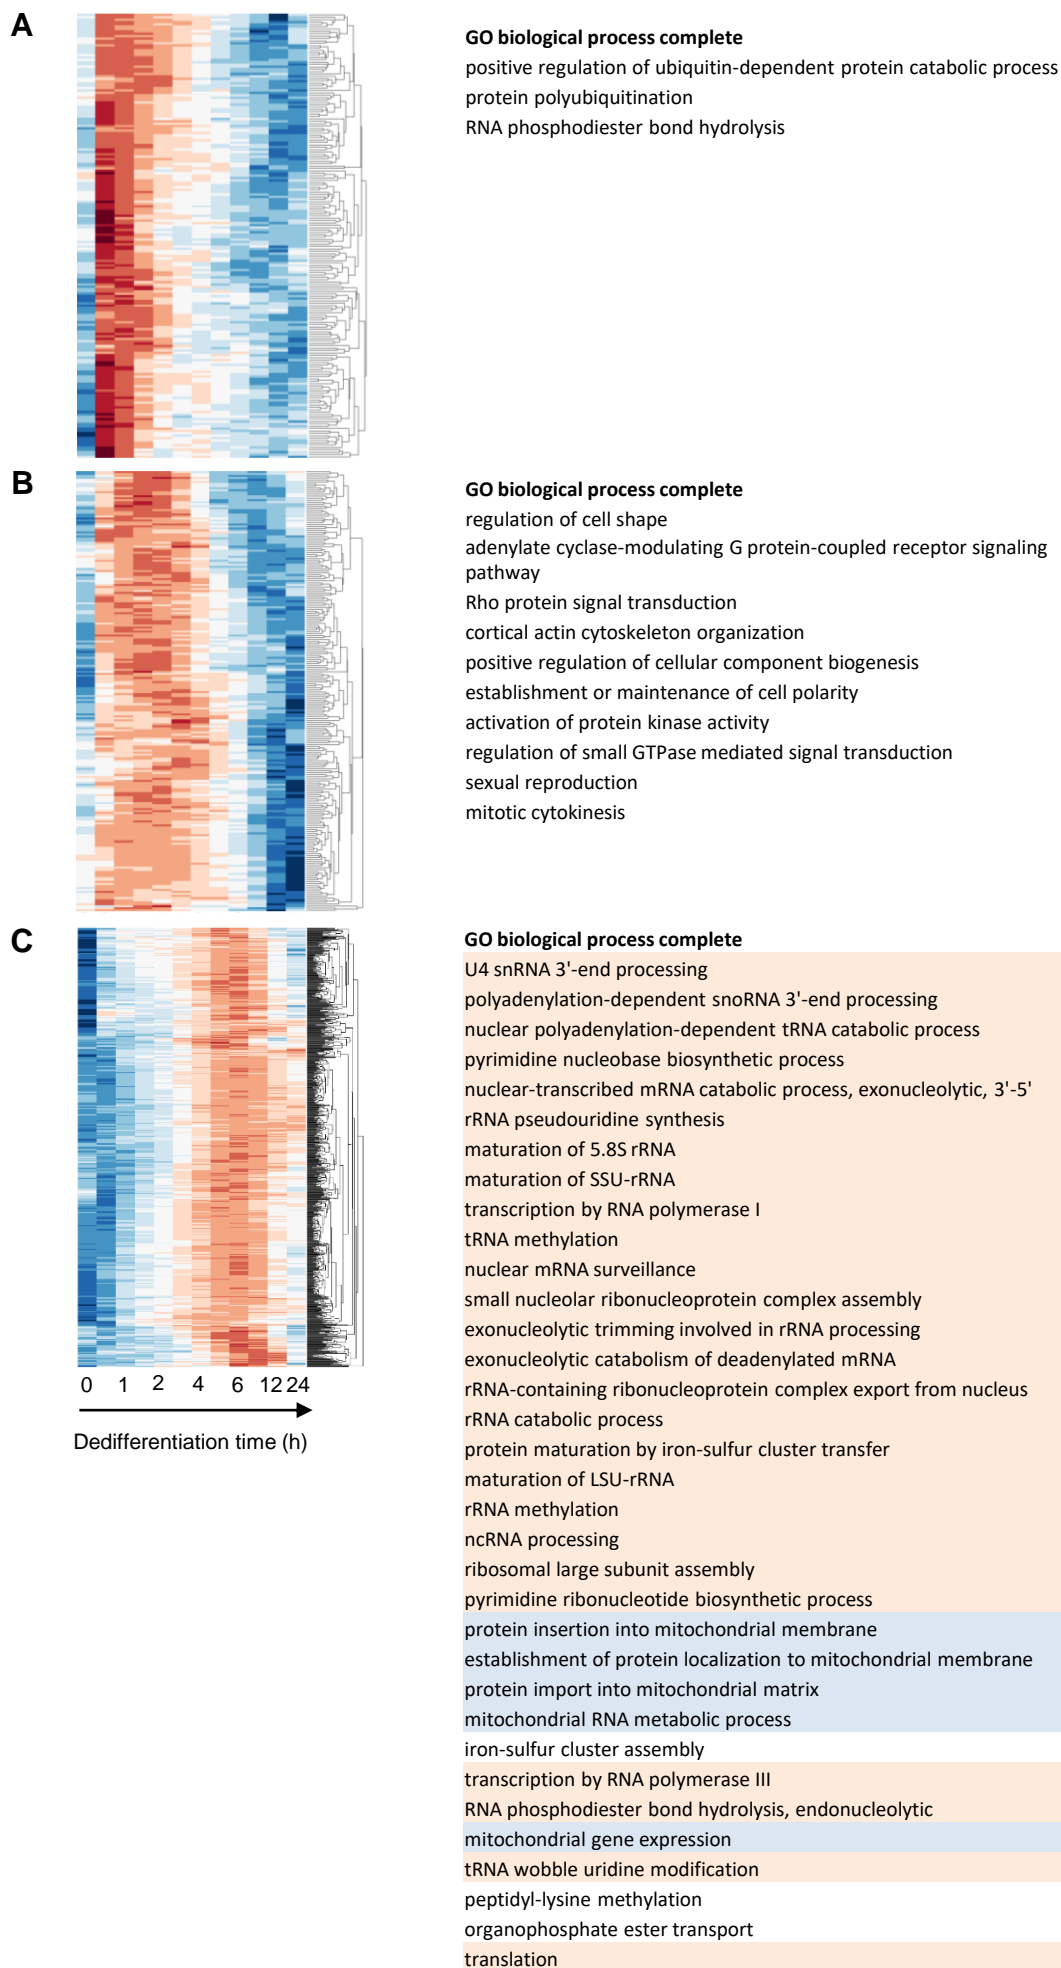

Supplement: supp [file elife-55435-supp-v1.zip › elife_poa_e55435_Figure_2_figure_supplement_7.pdf]

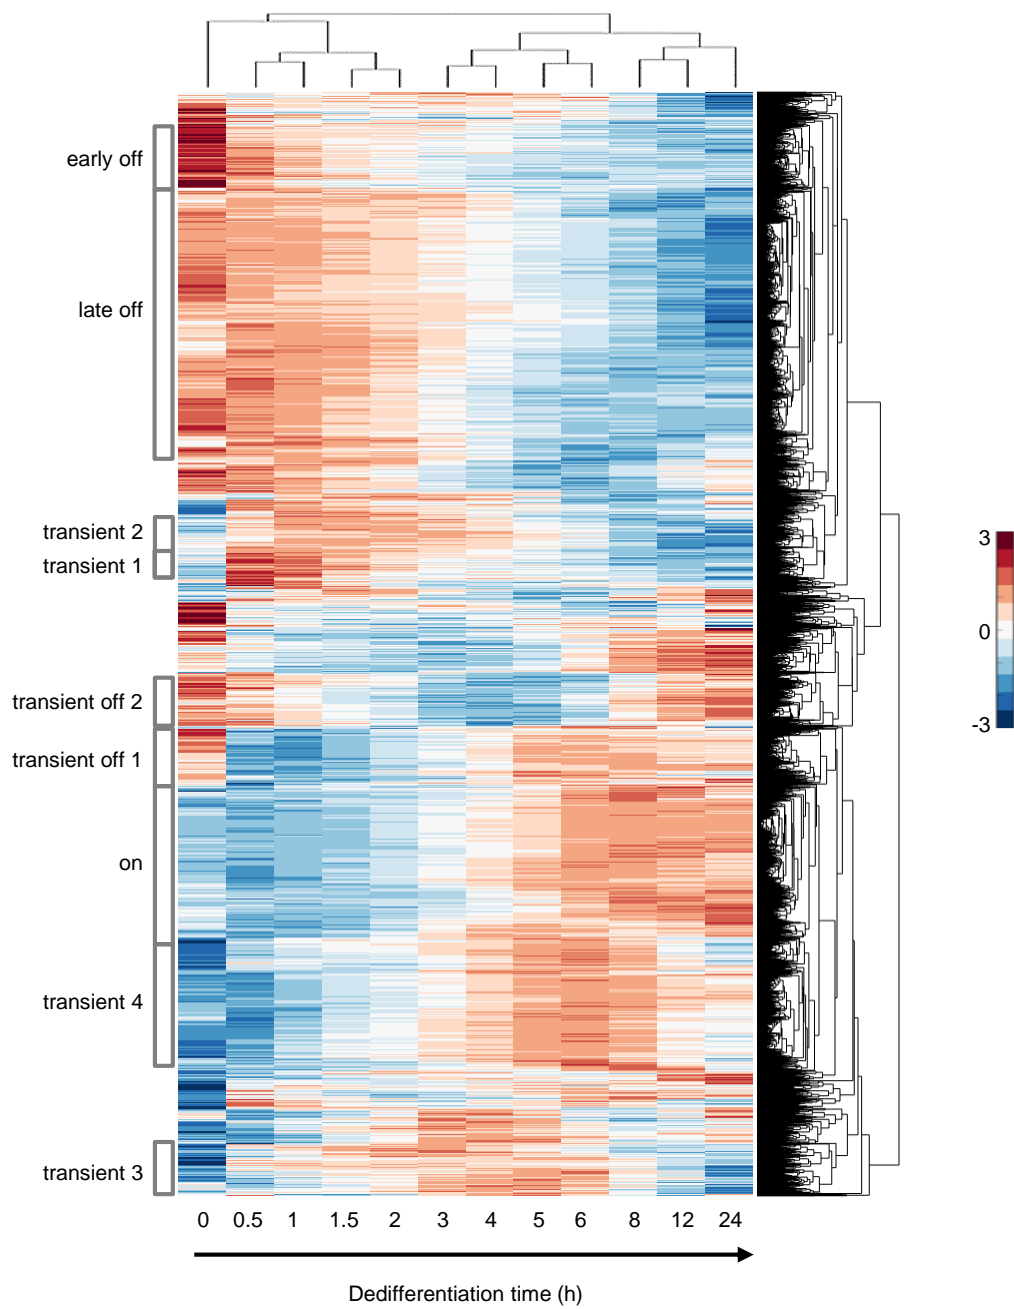

Supplement: supp [file elife-55435-supp-v1.zip › elife_poa_e55435_Figure_2_figure_supplement_5.pdf]

**A**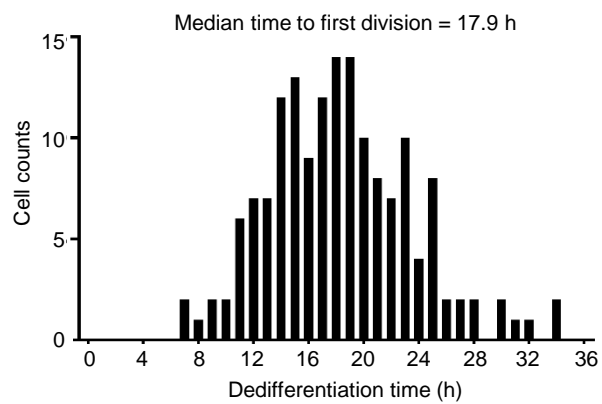**B**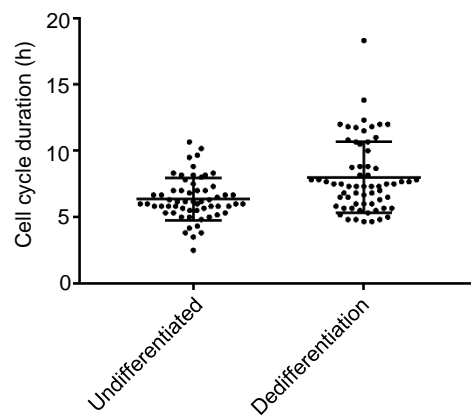**C**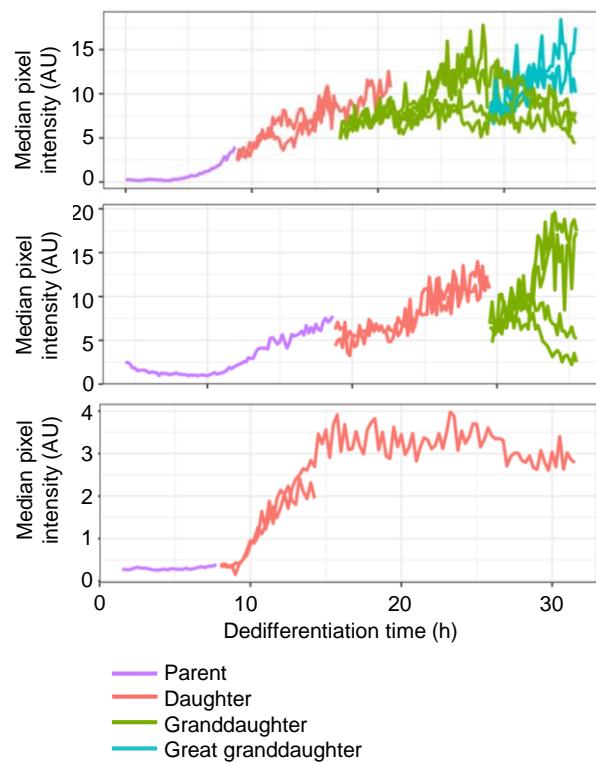**D**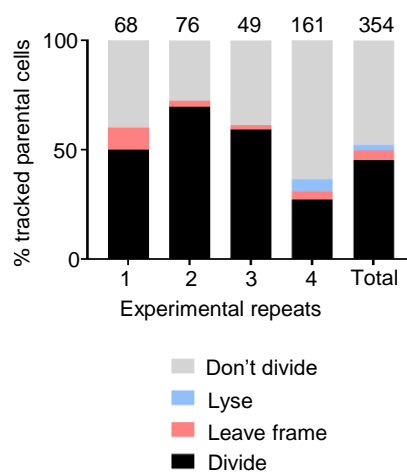

Supplement: supp [file elife-55435-supp-v1.zip › elife_poa_e55435_Figure_4_figure_supplement_1.pdf]
